# Supplementary material for: Spatial and Temporal Trends of Global Pollination Benefit
Source: PLOS journal article supplement (doi:10.1371/journal.pone.0035954), 2012-04-26

**Figure S1. Temporal trend for pollination-weighted production quantities and pollination benefits** (equation (1) and 2) and price trends per country. In addition, production quantities and producer prices-weighted production quantities for selected pollination-independent crops (maize, rice, wheat, rye, yams, sorghum, taro) are shown country. For comparison all time series have been standardized to a value of 1 for 1993.

# Albania

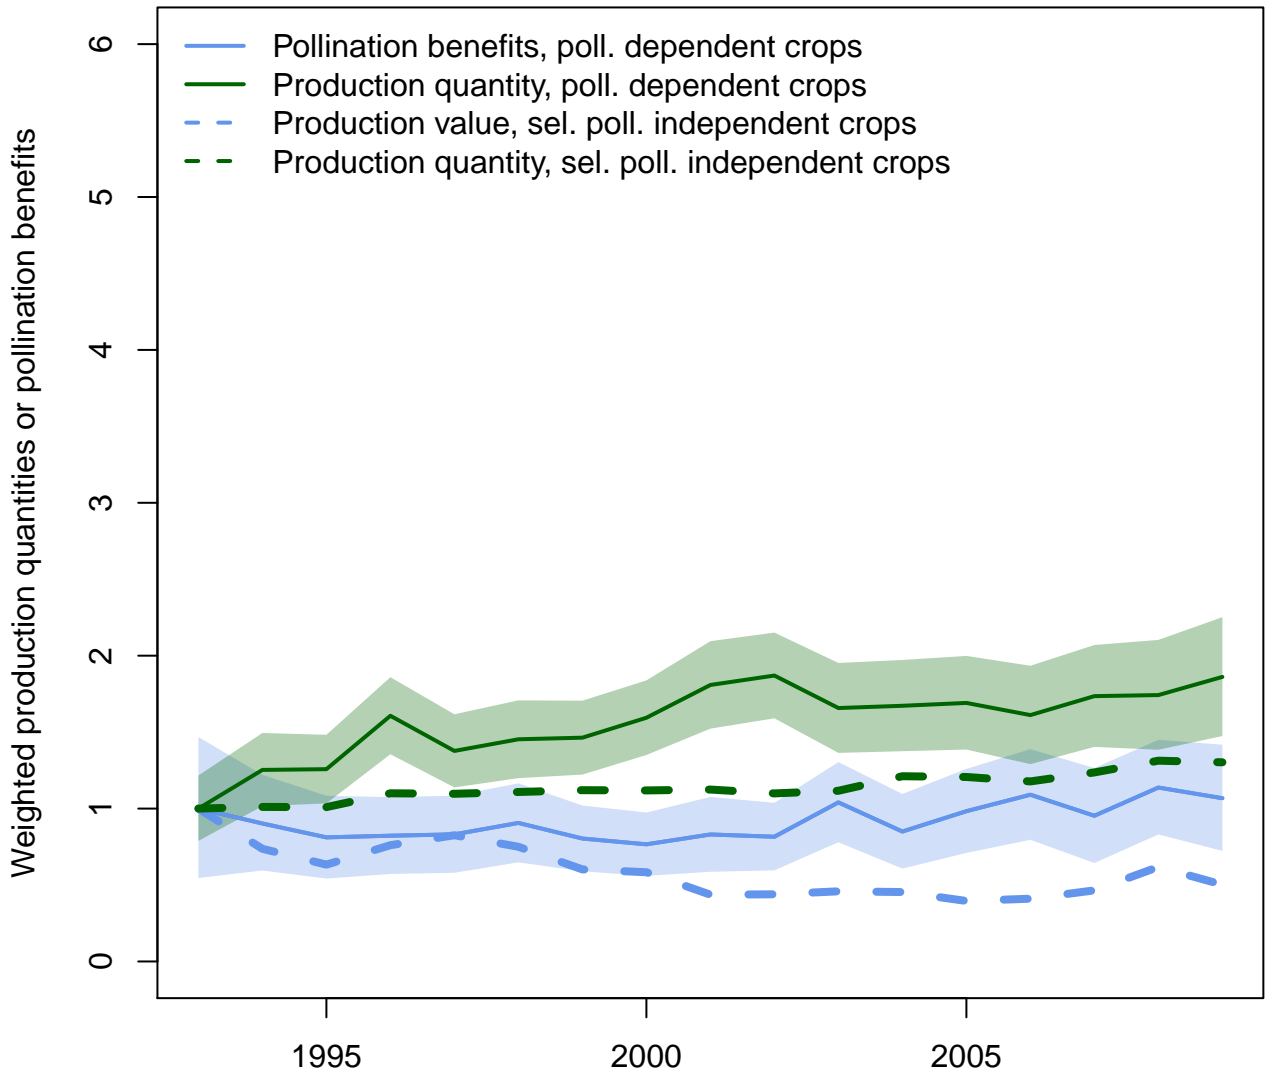

# Albania

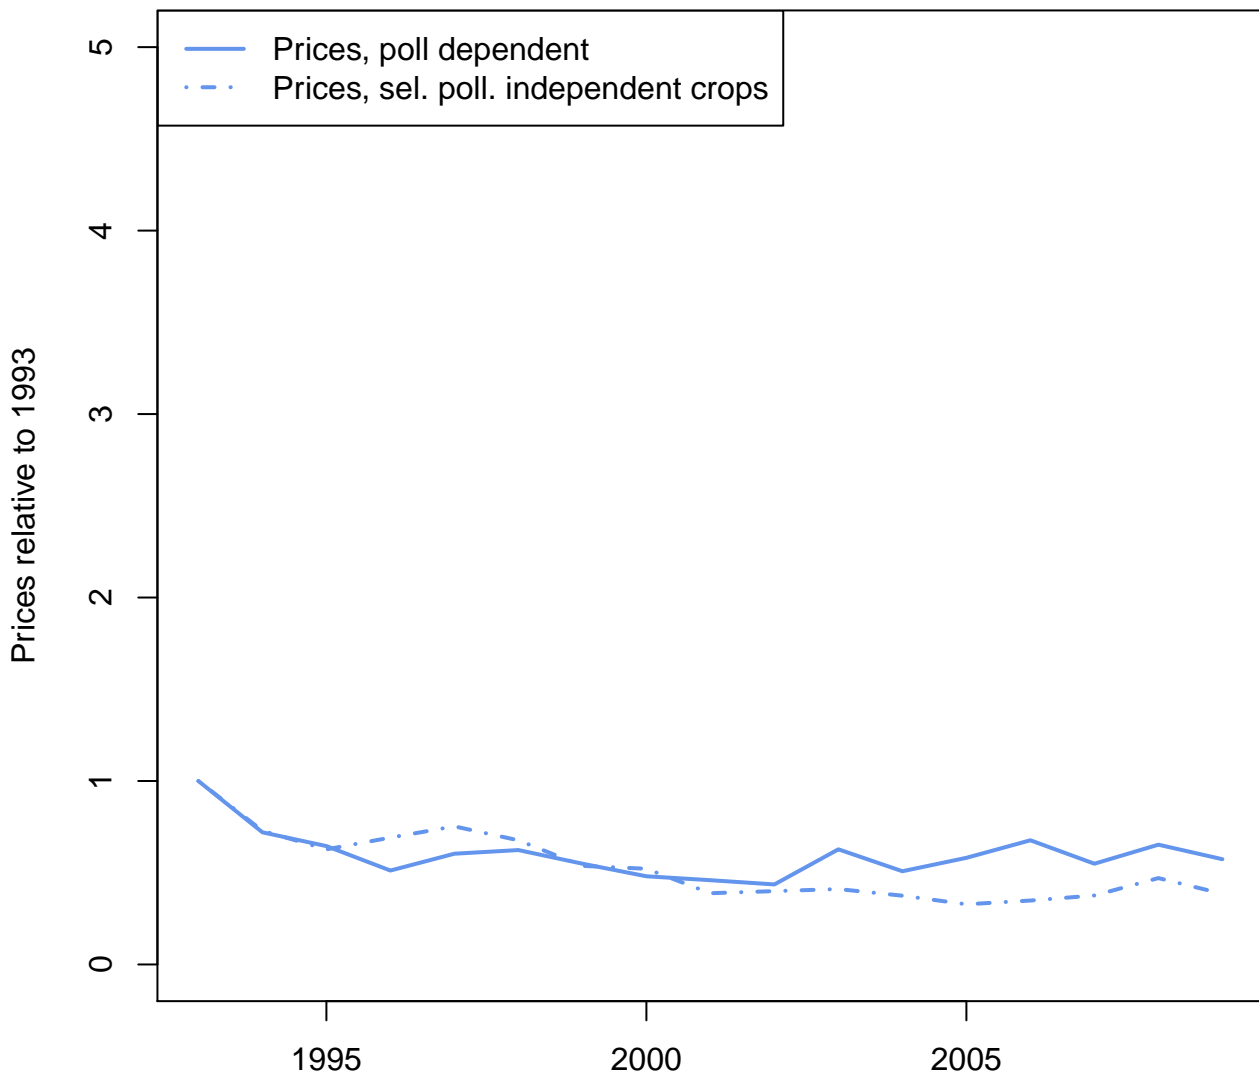

# Algeria

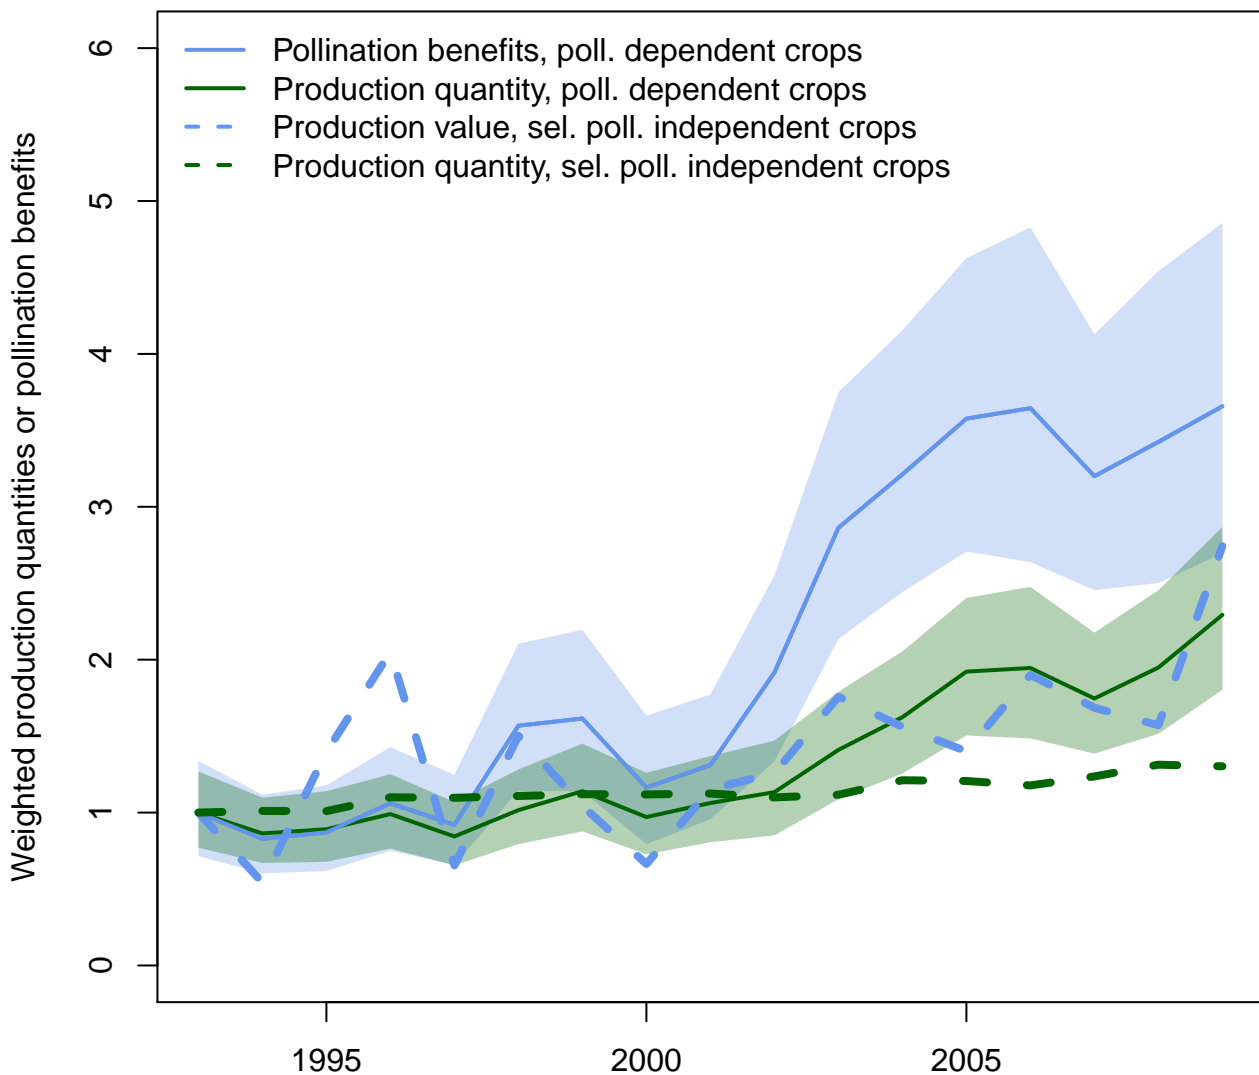

# Algeria

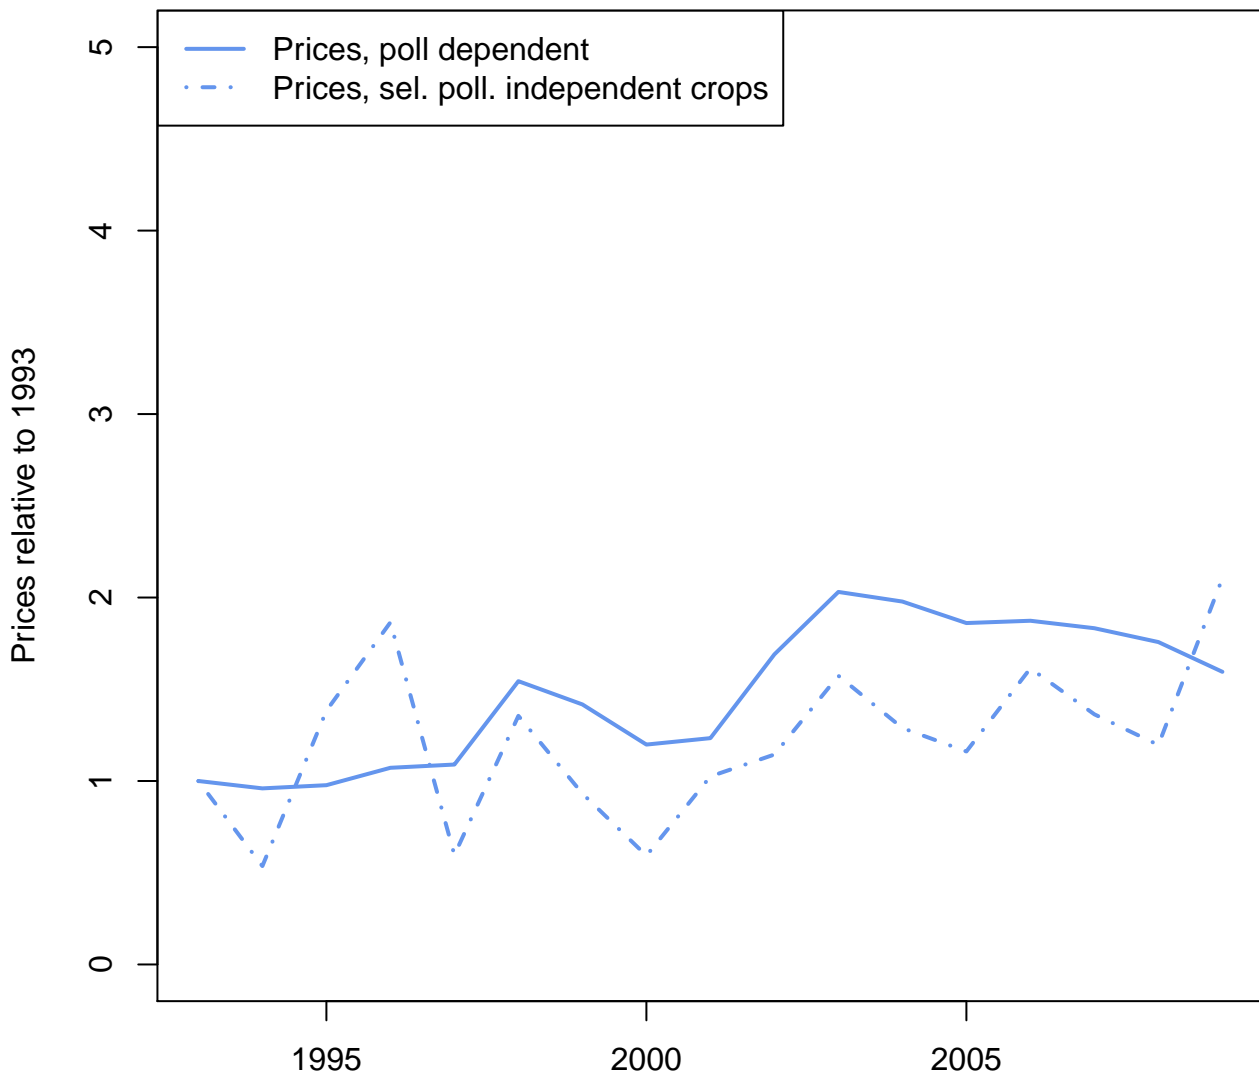

# Antigua and Barbuda

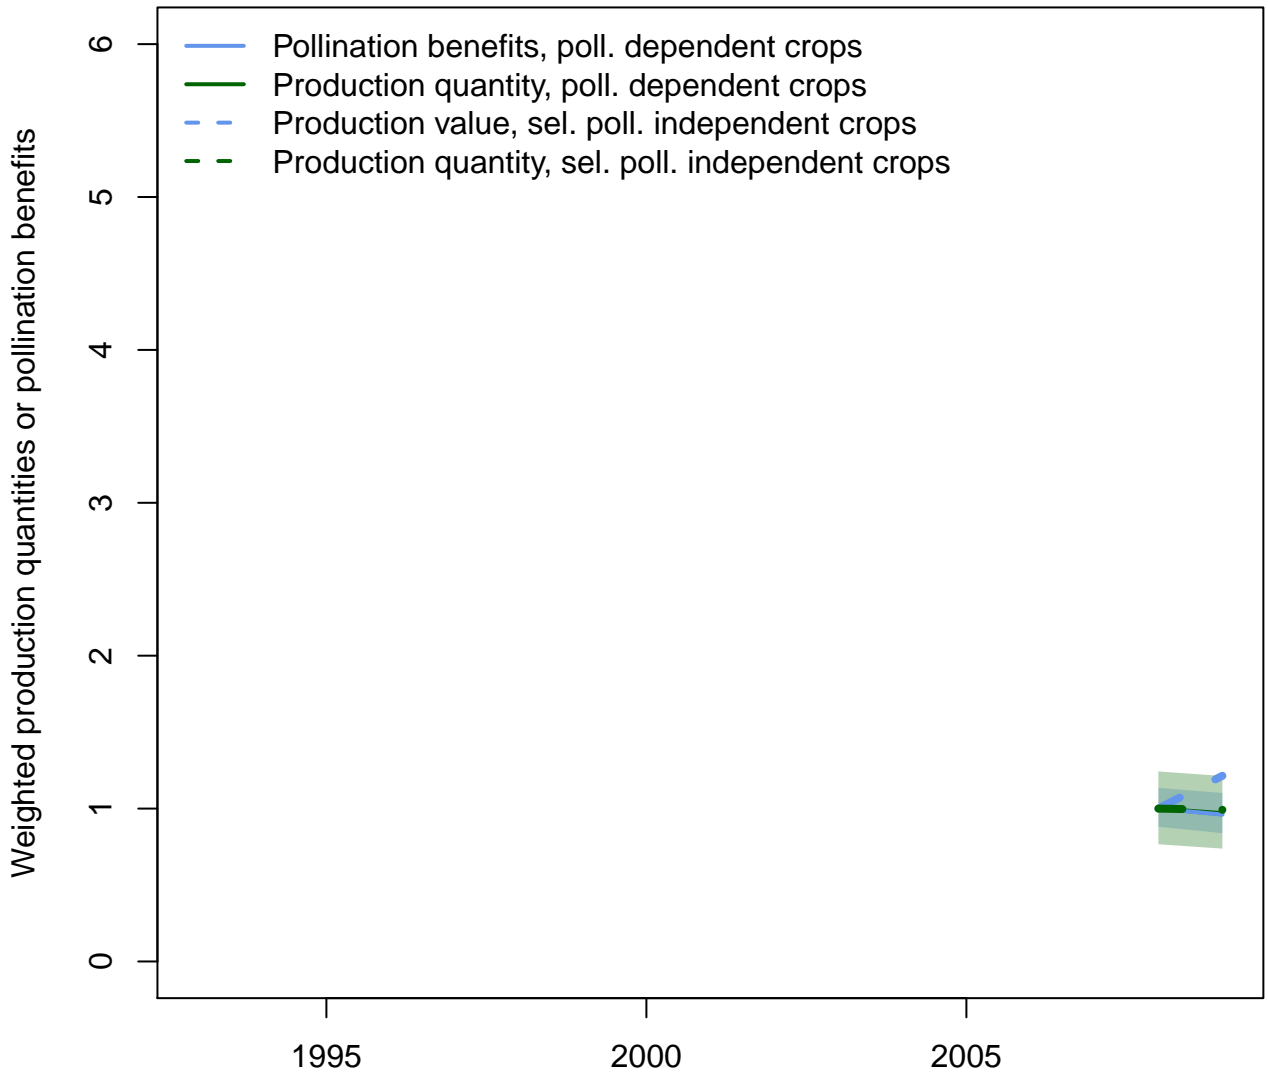

# Antigua and Barbuda

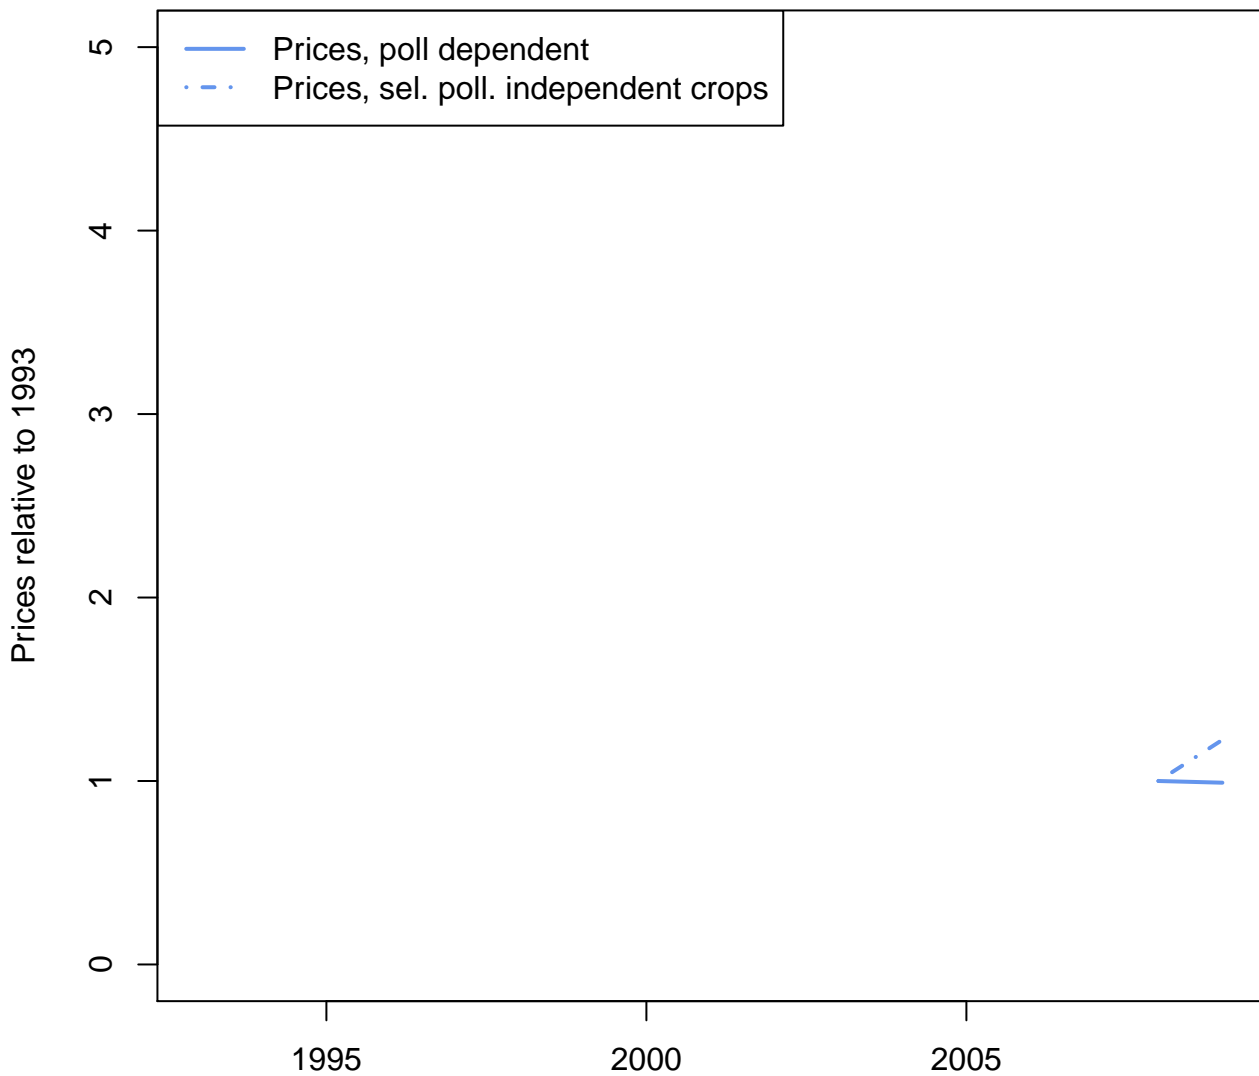

# Argentina

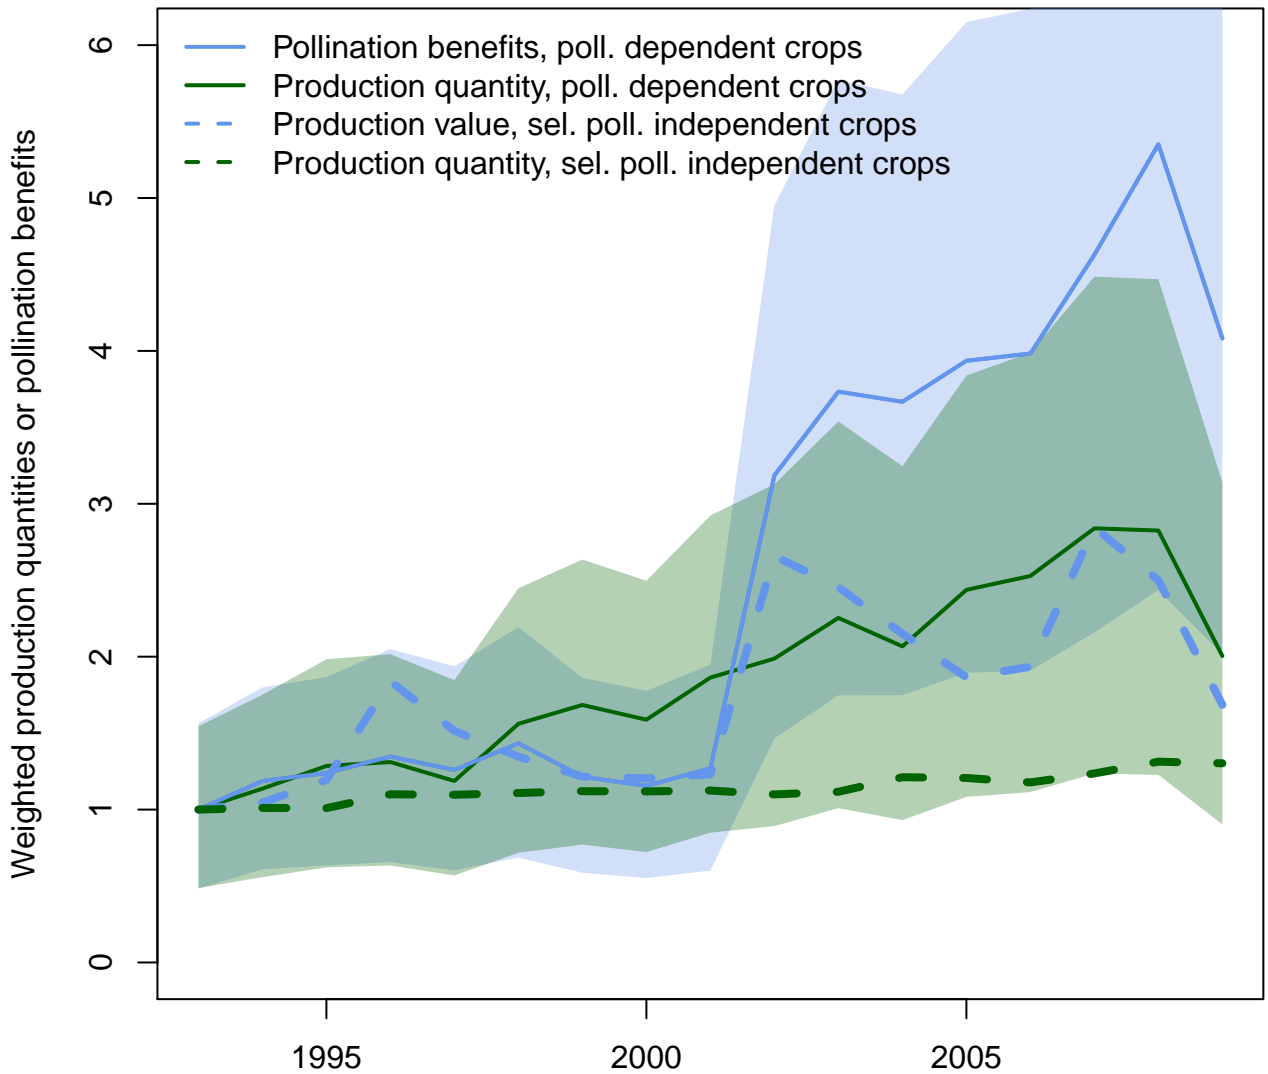



# Argentina

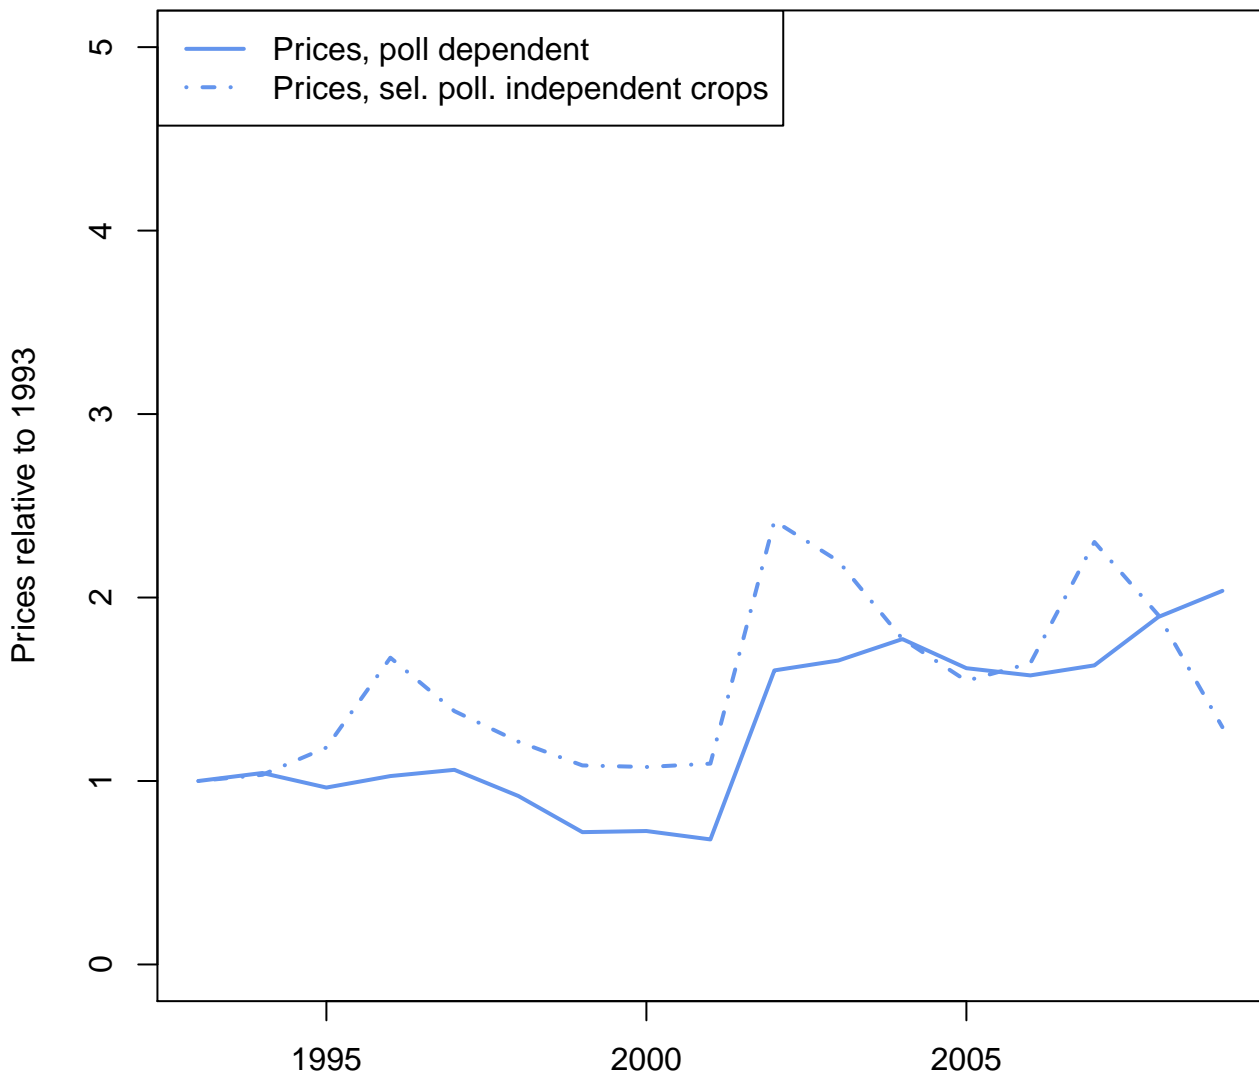

# Armenia

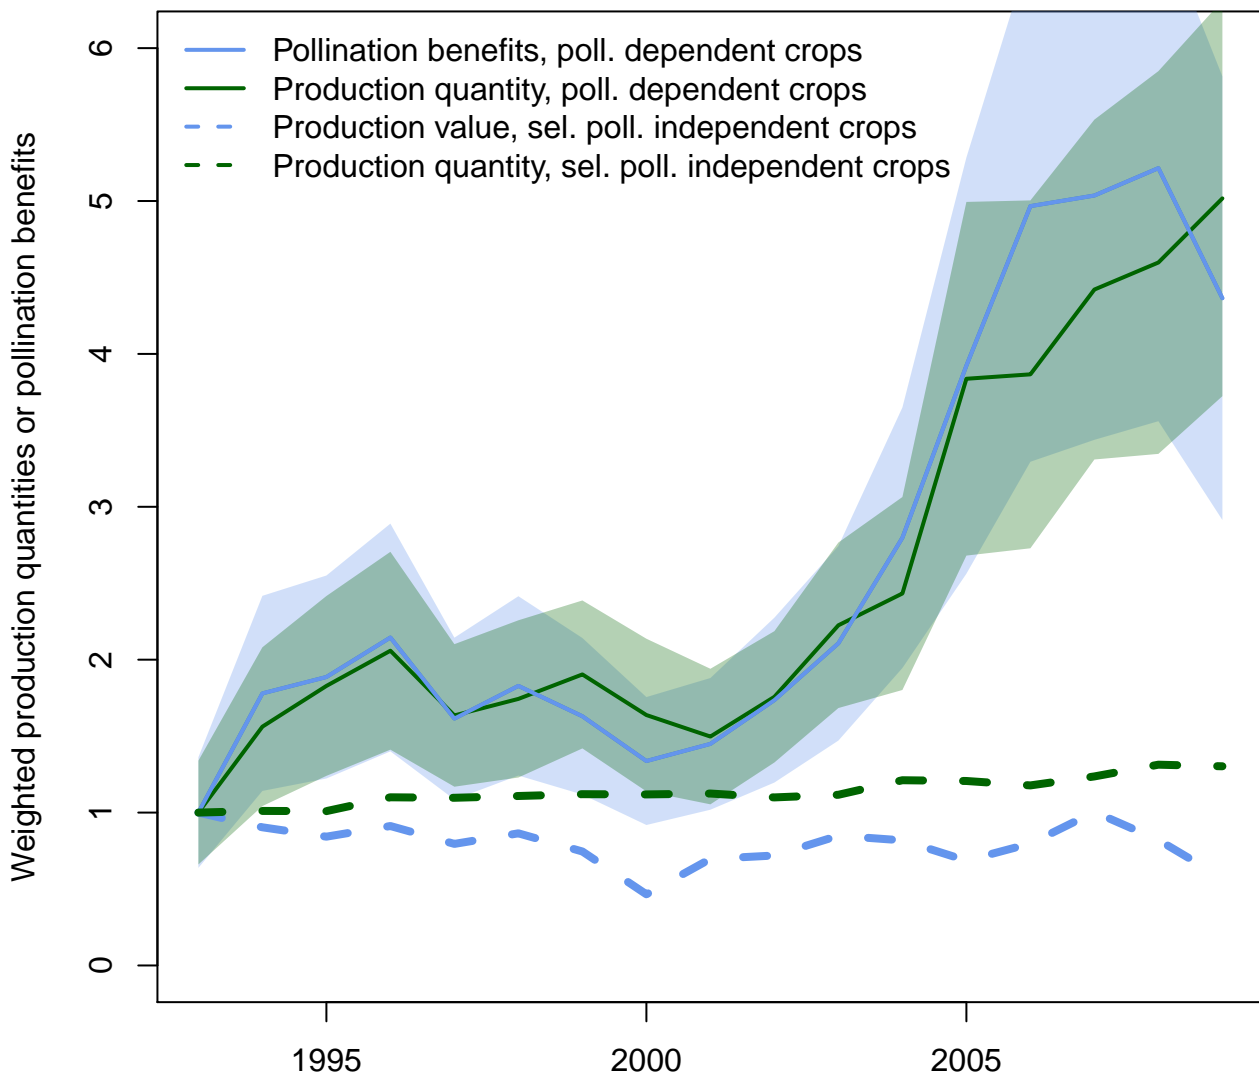

# Armenia

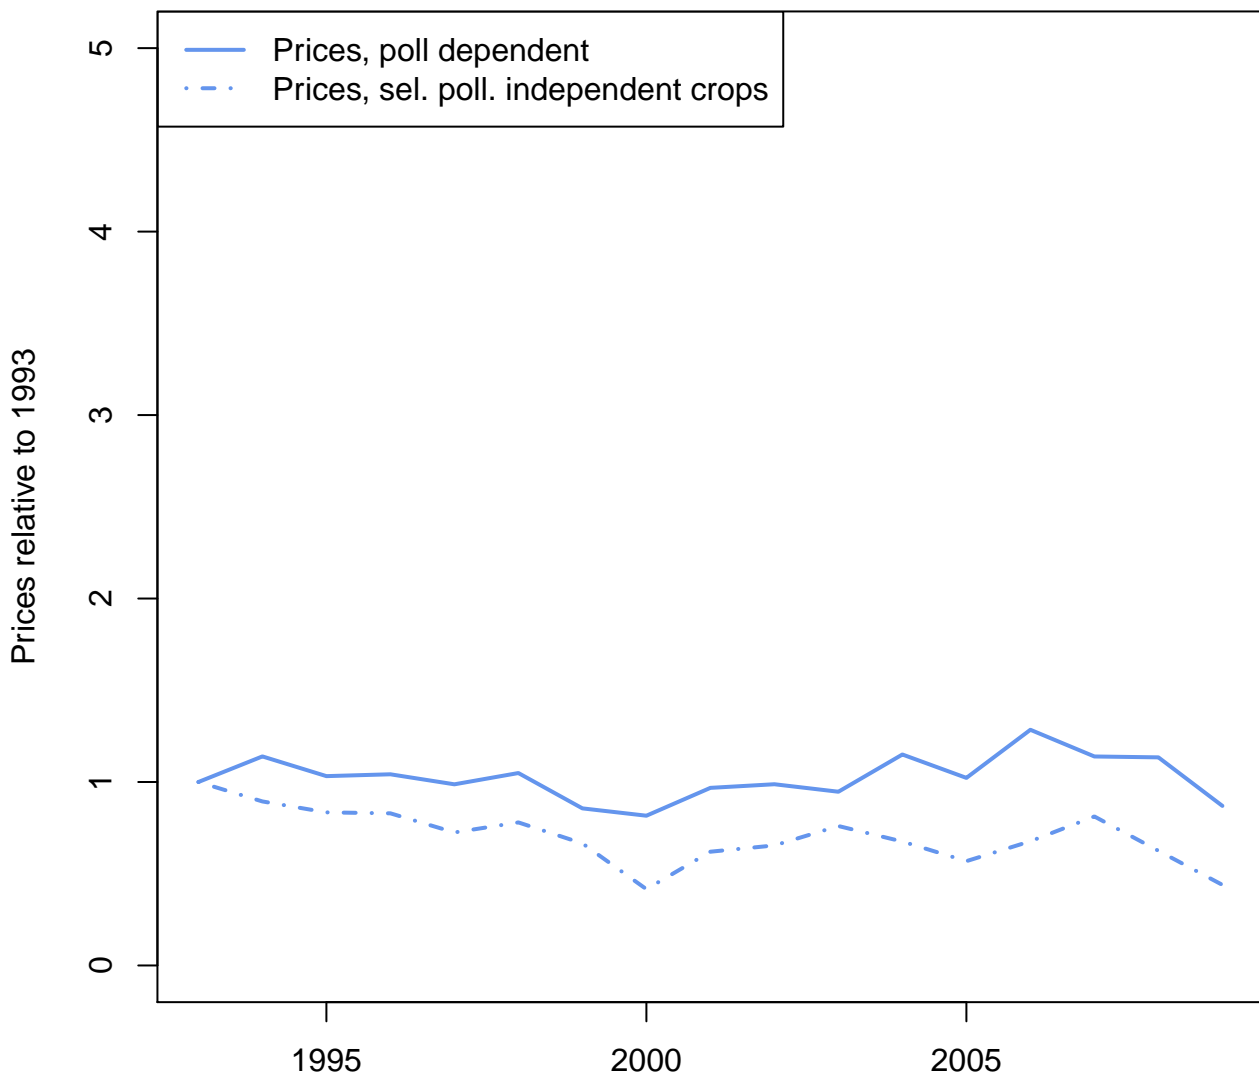

# Australia

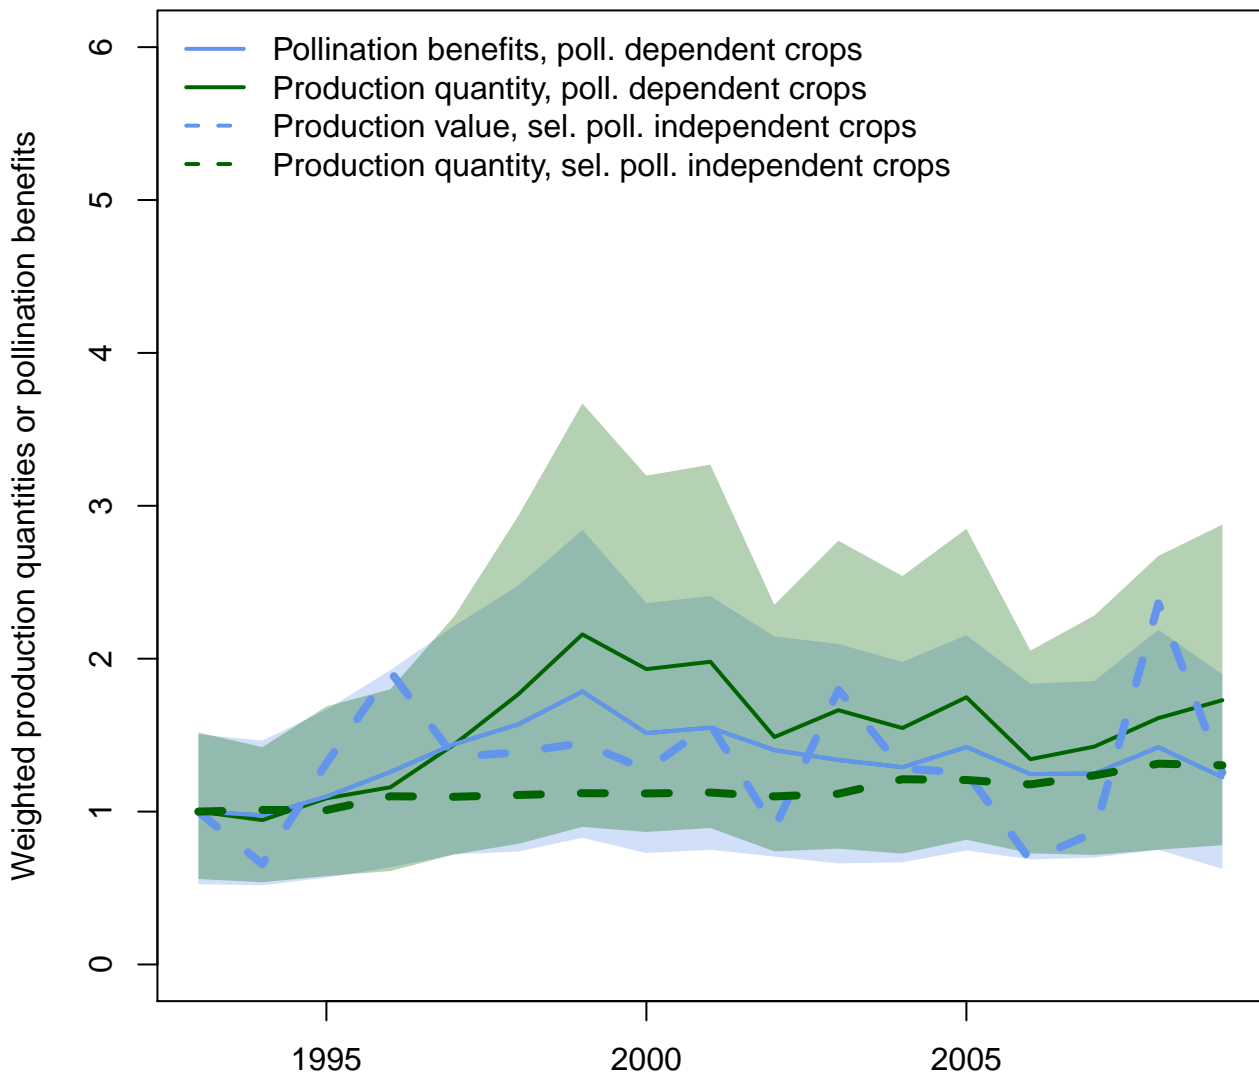

# Australia

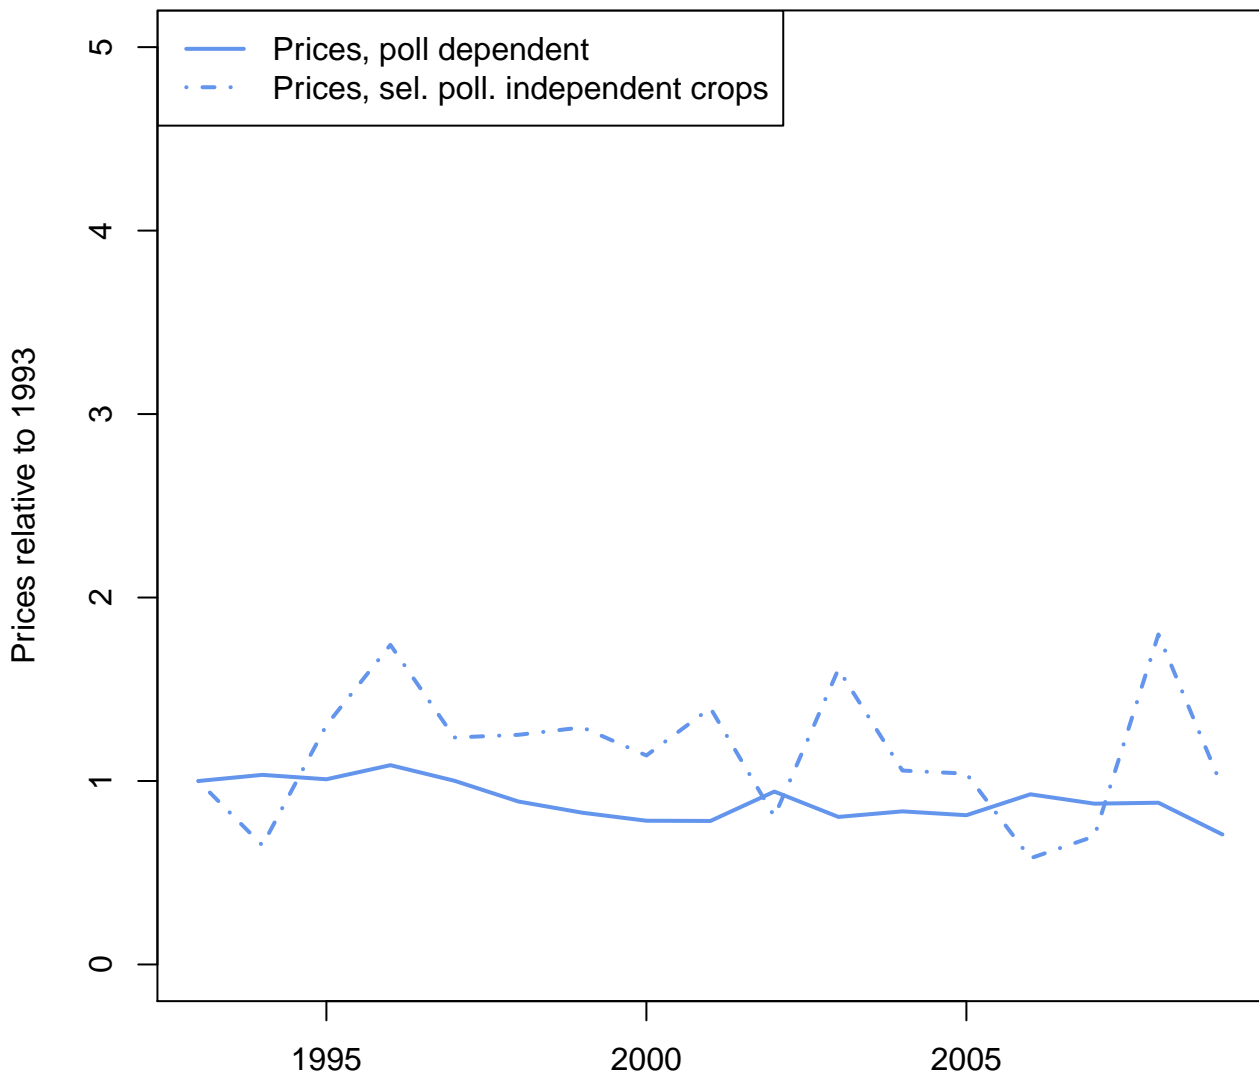

# Austria

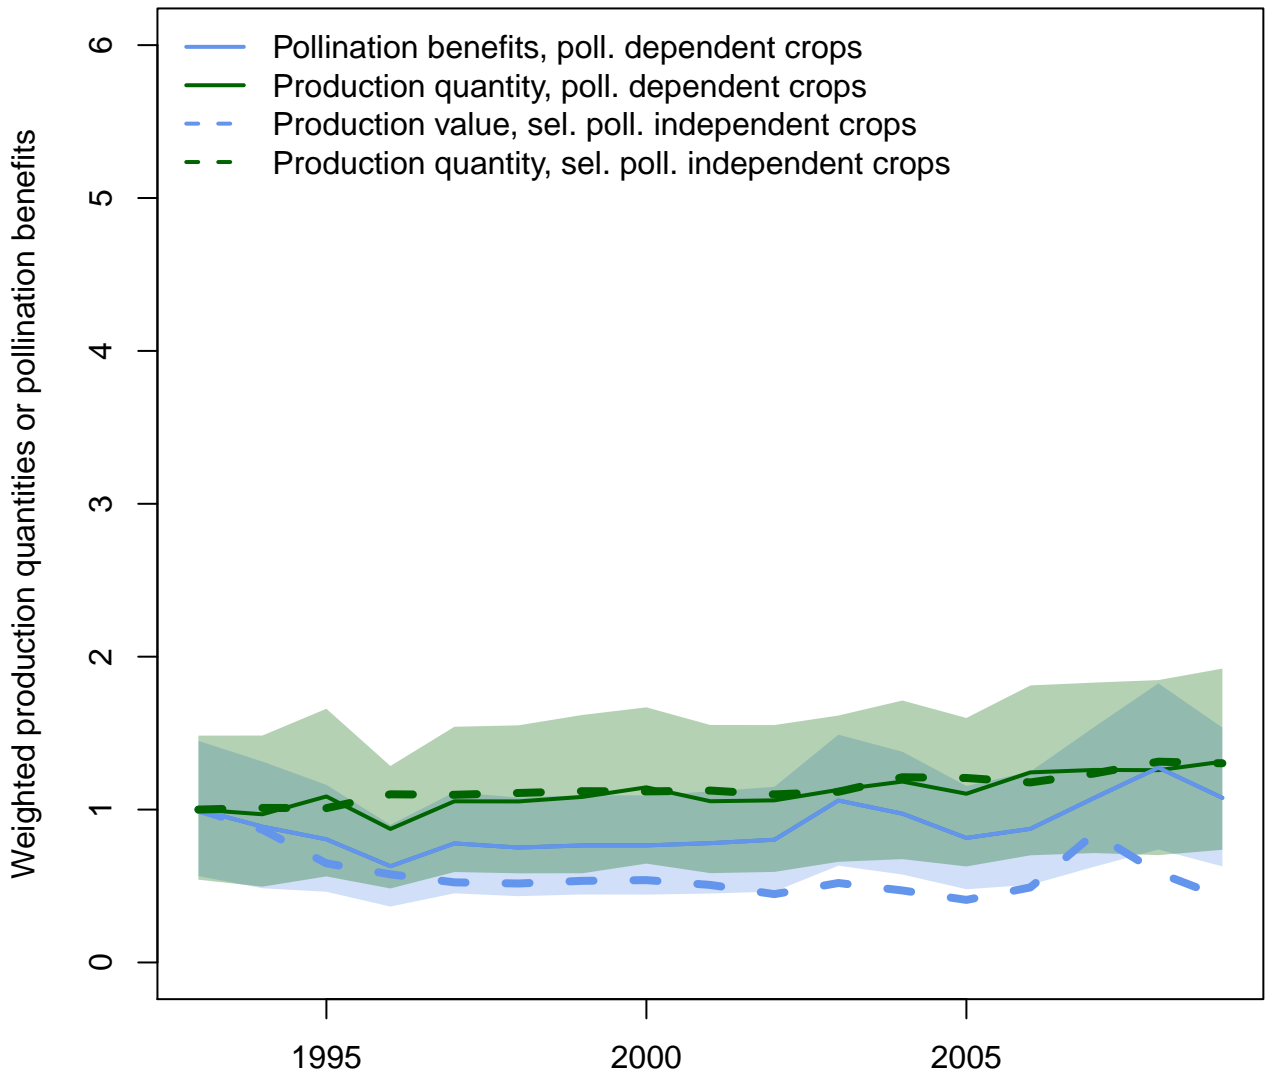

# Austria

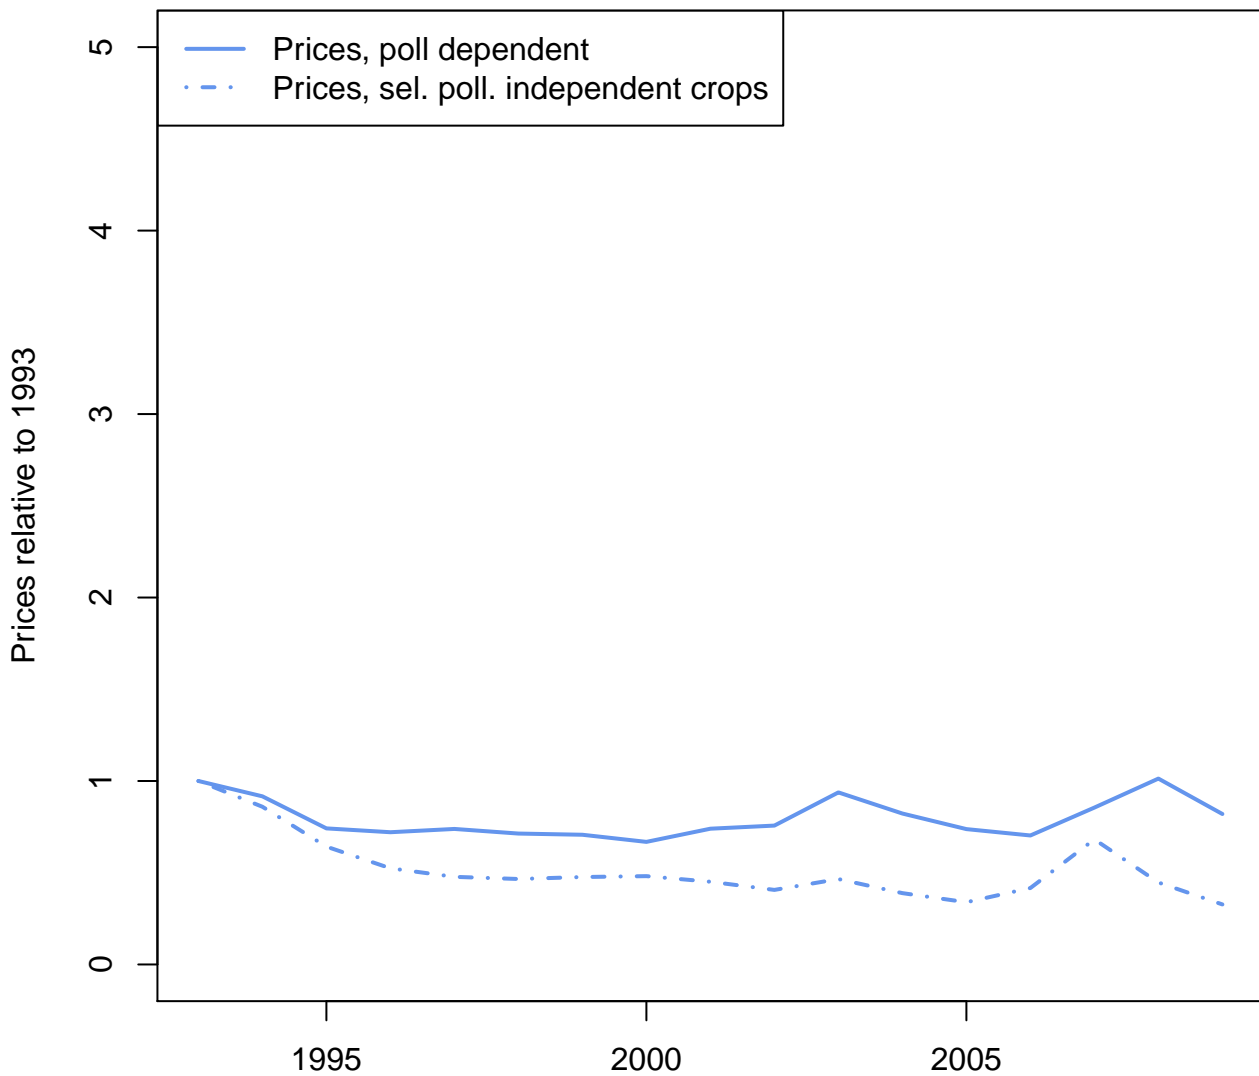

# Azerbaijan

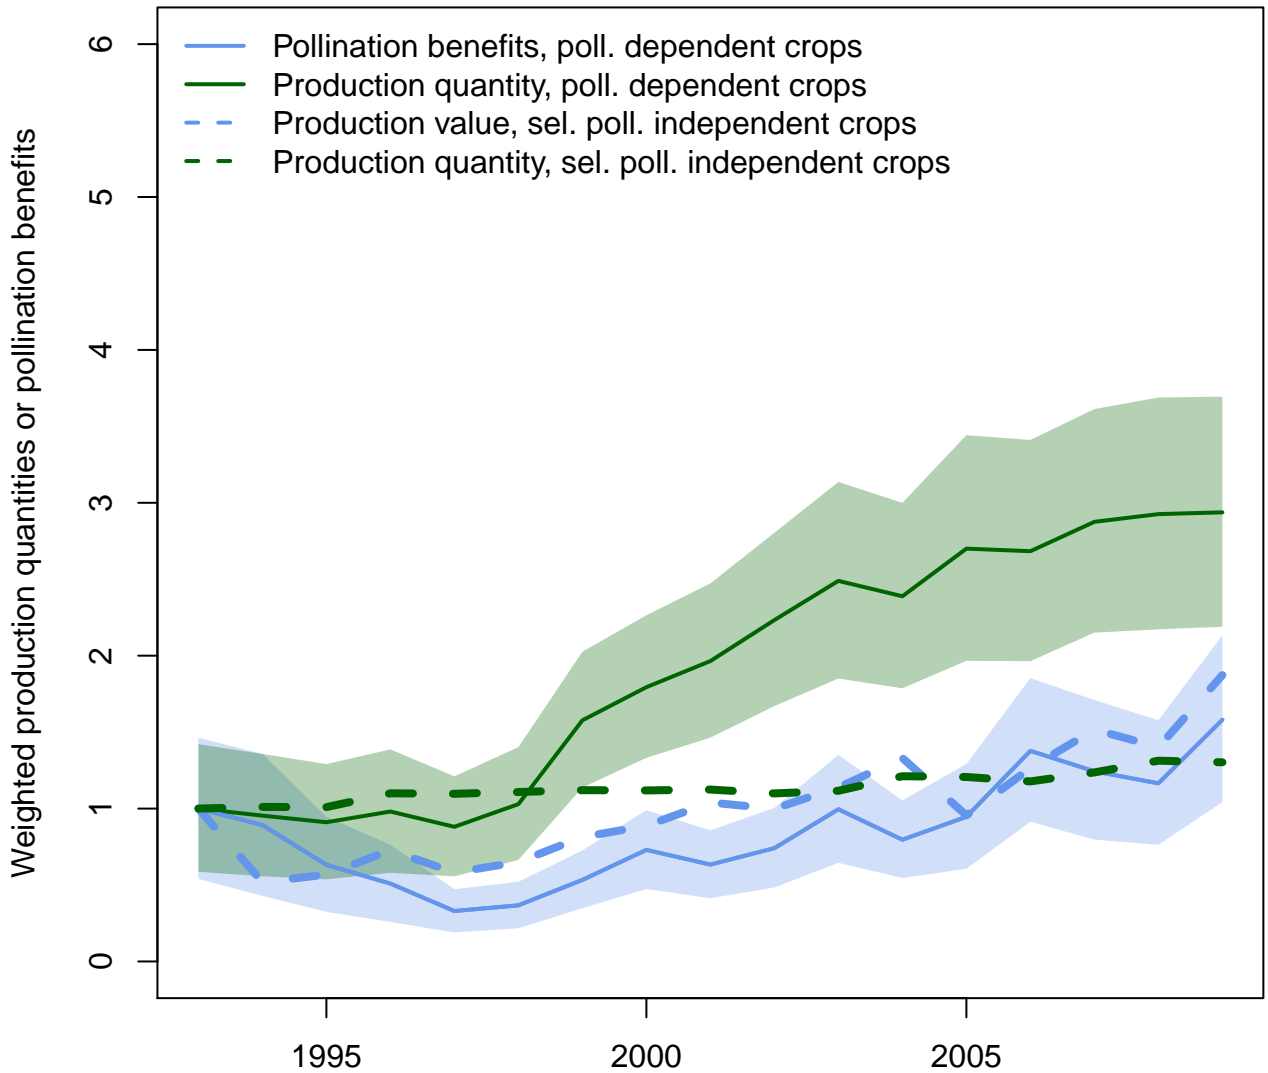



# Azerbaijan

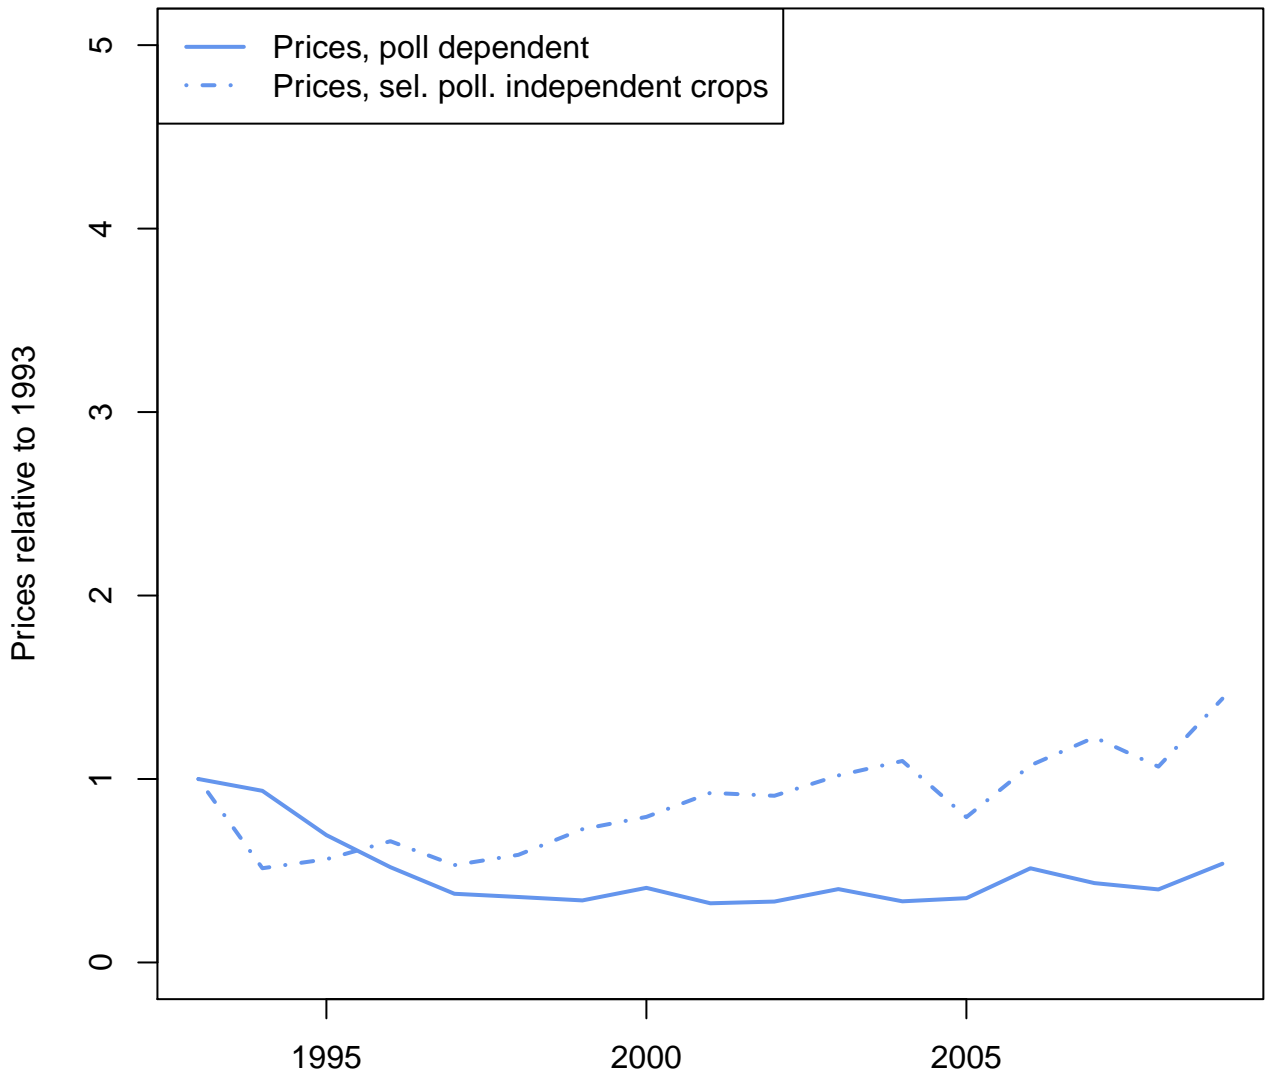

# Bangladesh

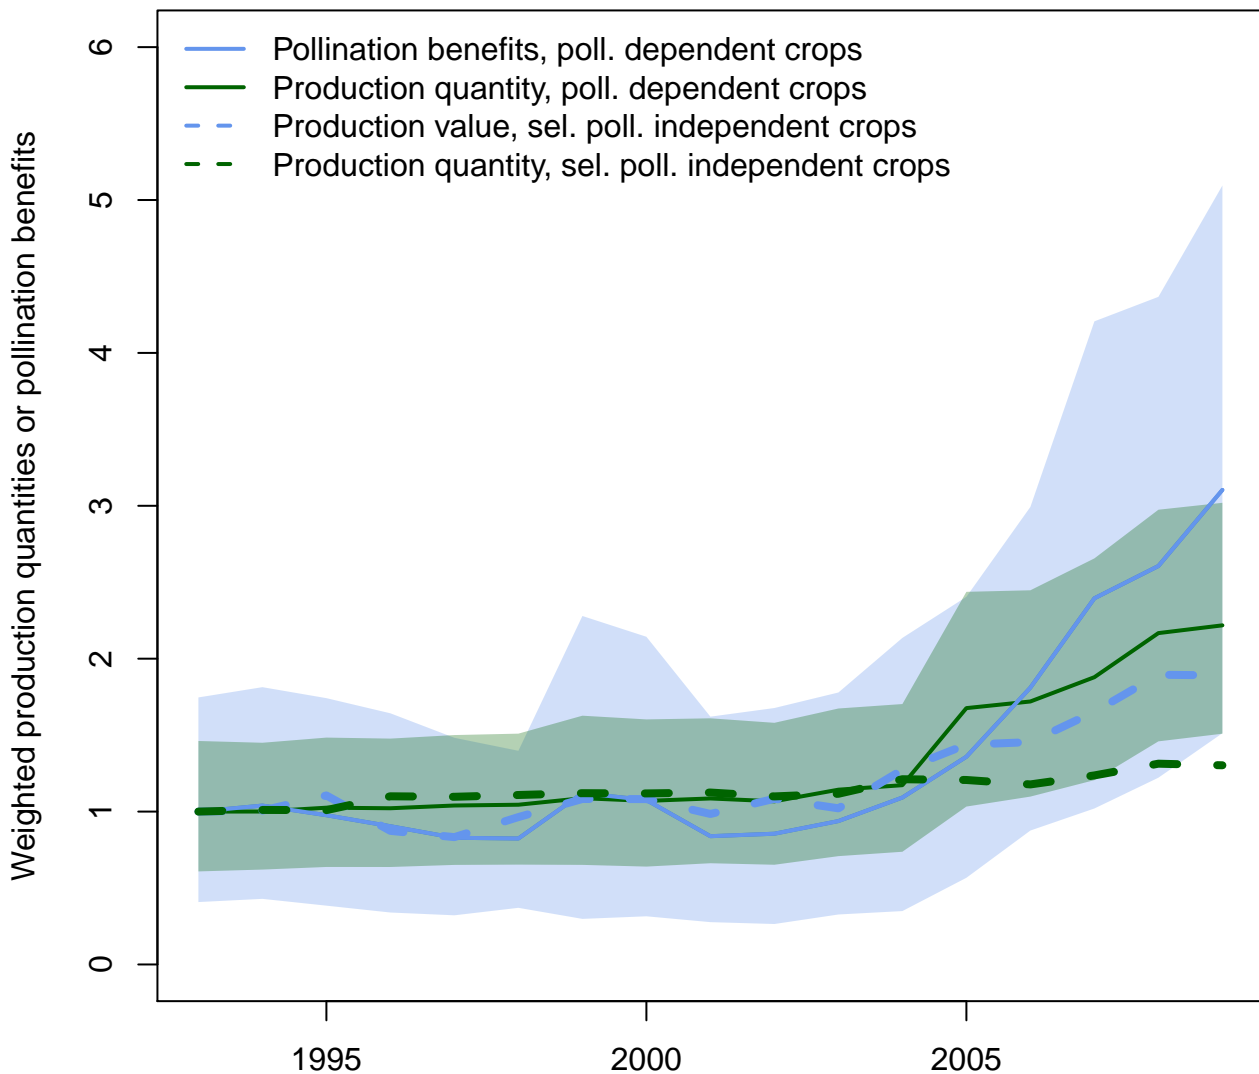

# Bangladesh

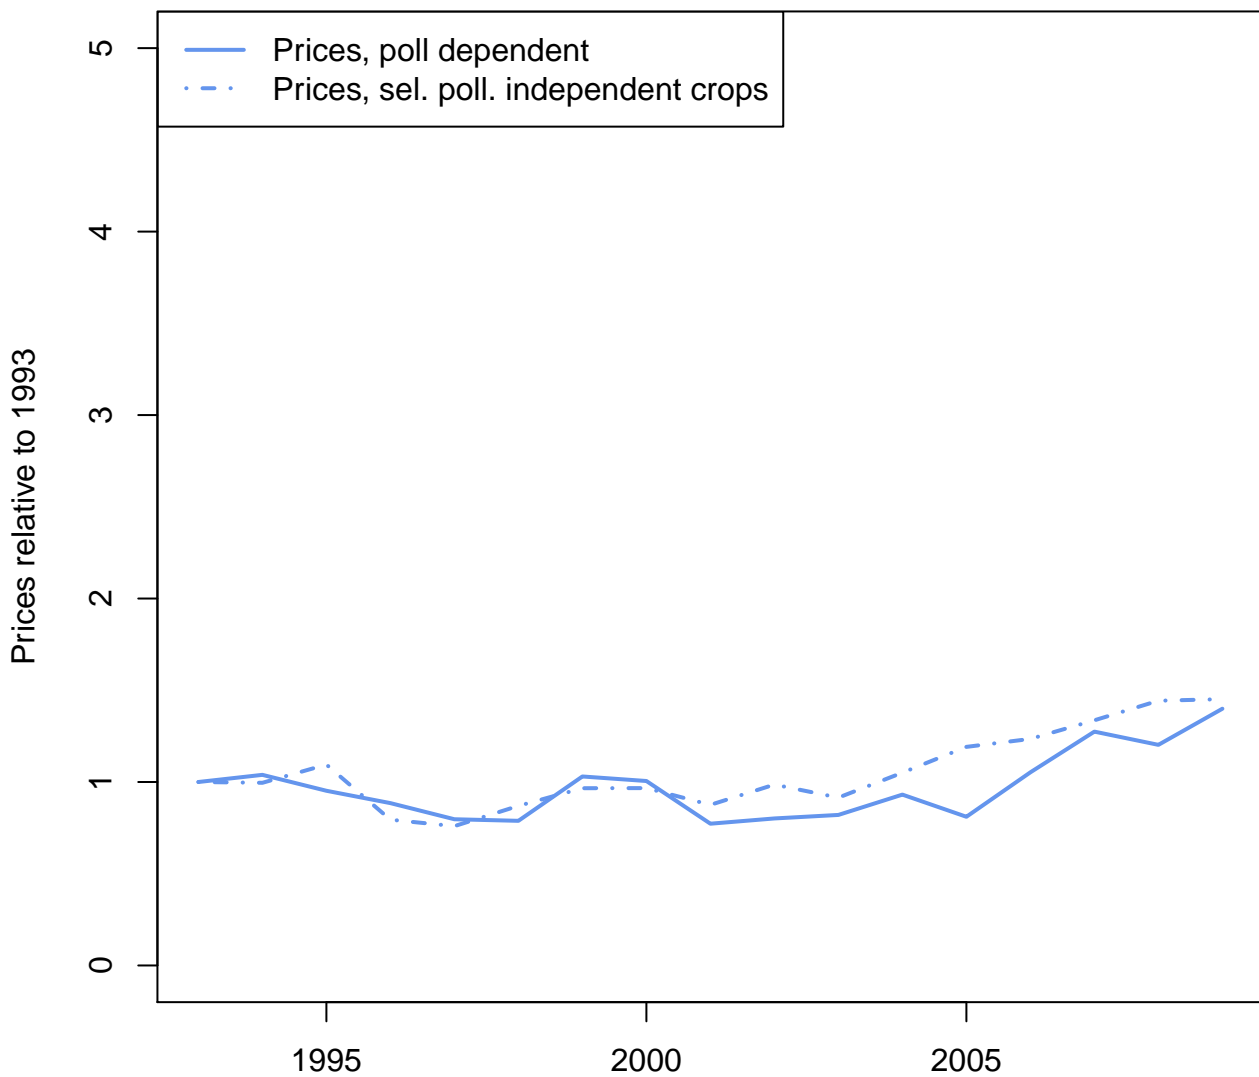

## Barbados

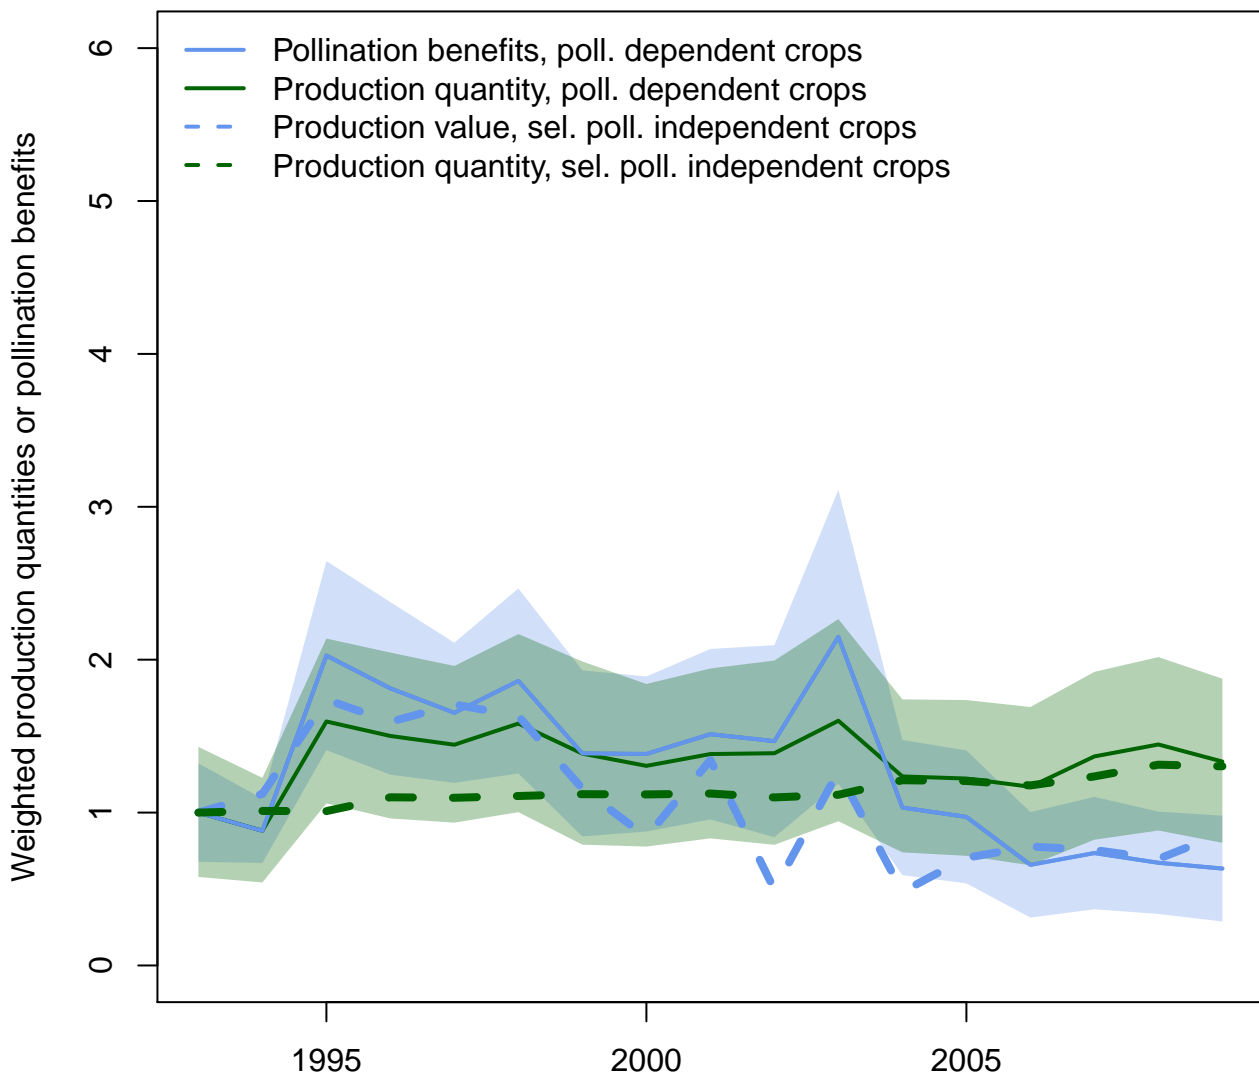

# Barbados

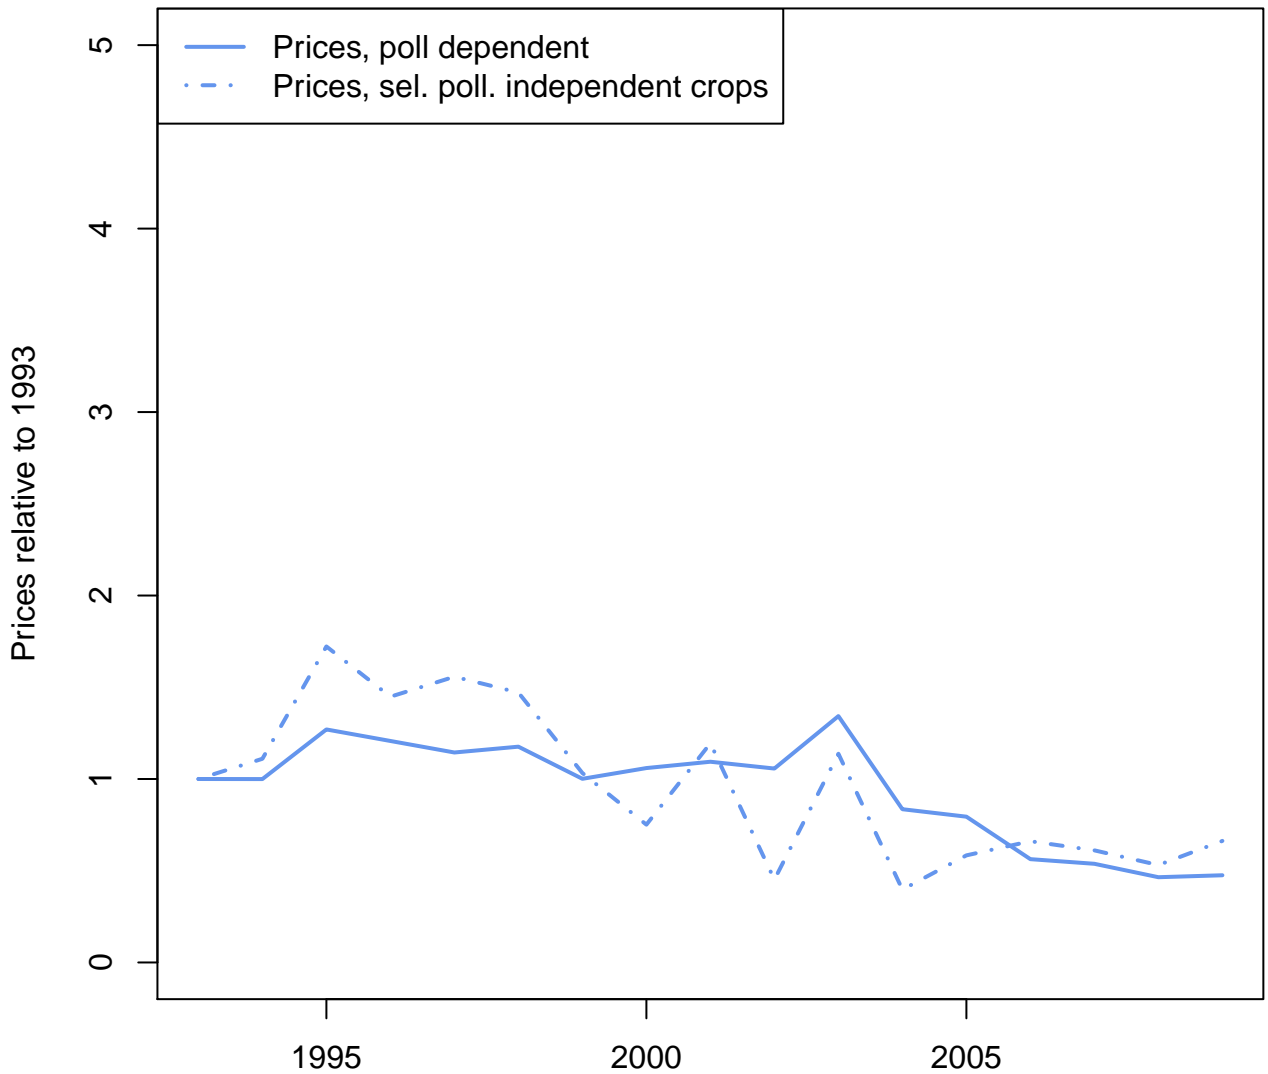

# Belarus

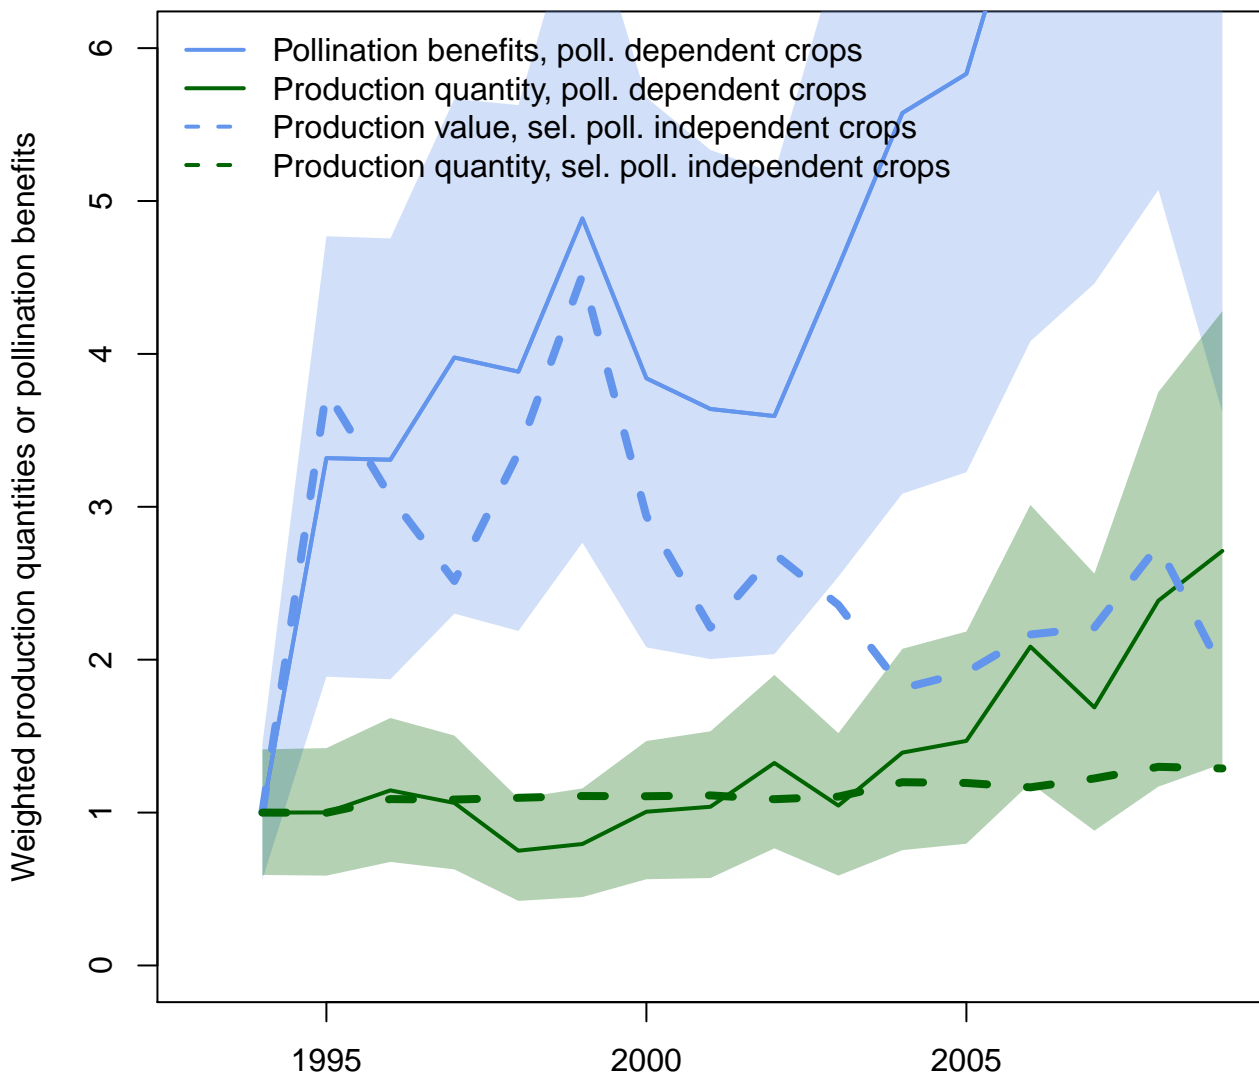

# Belarus

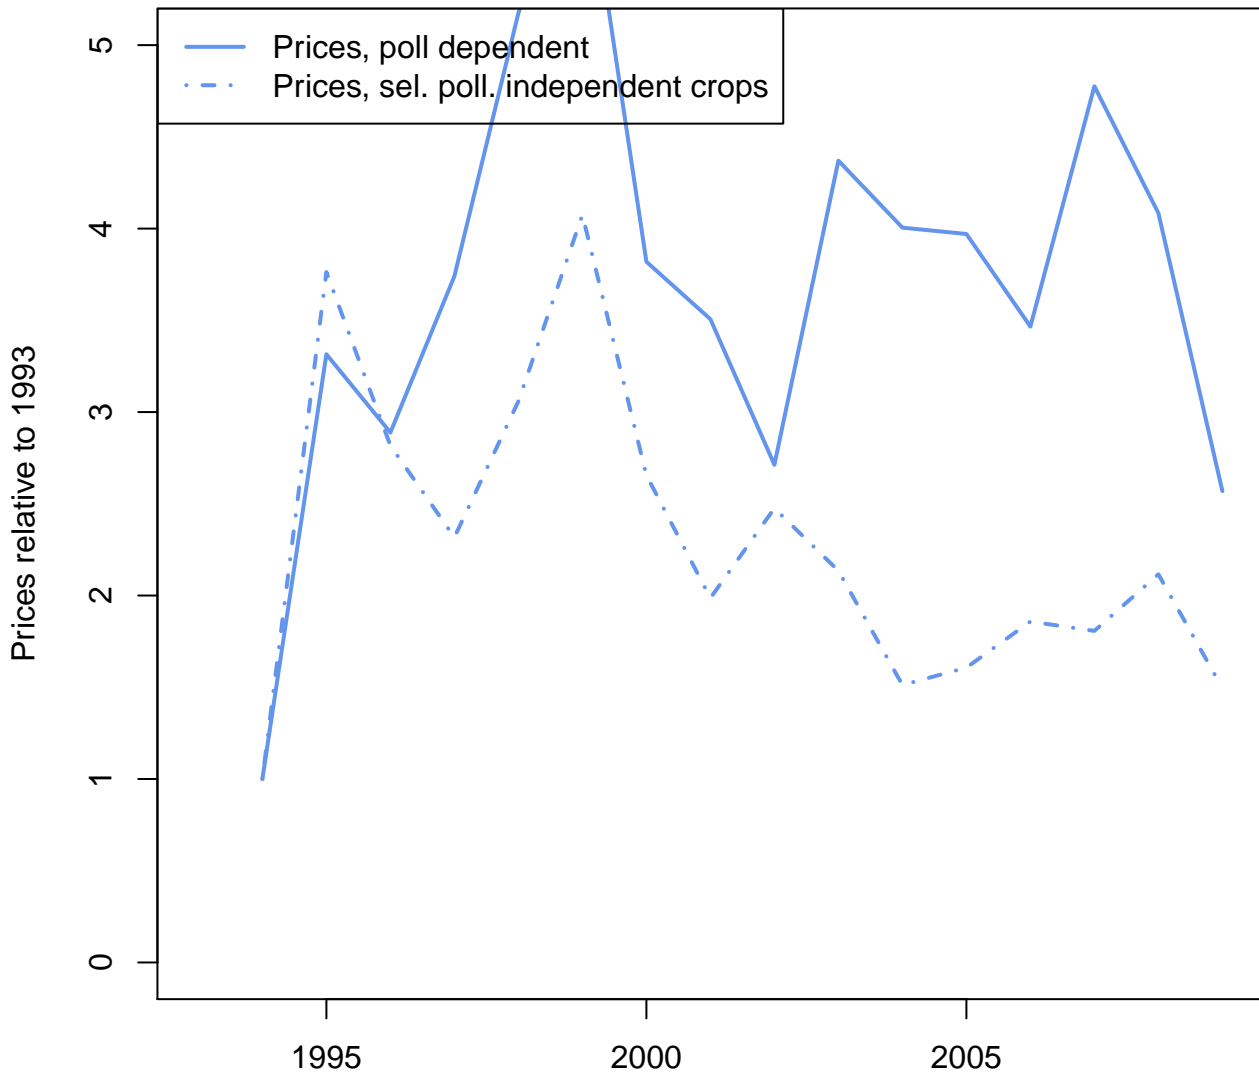

# Belgium

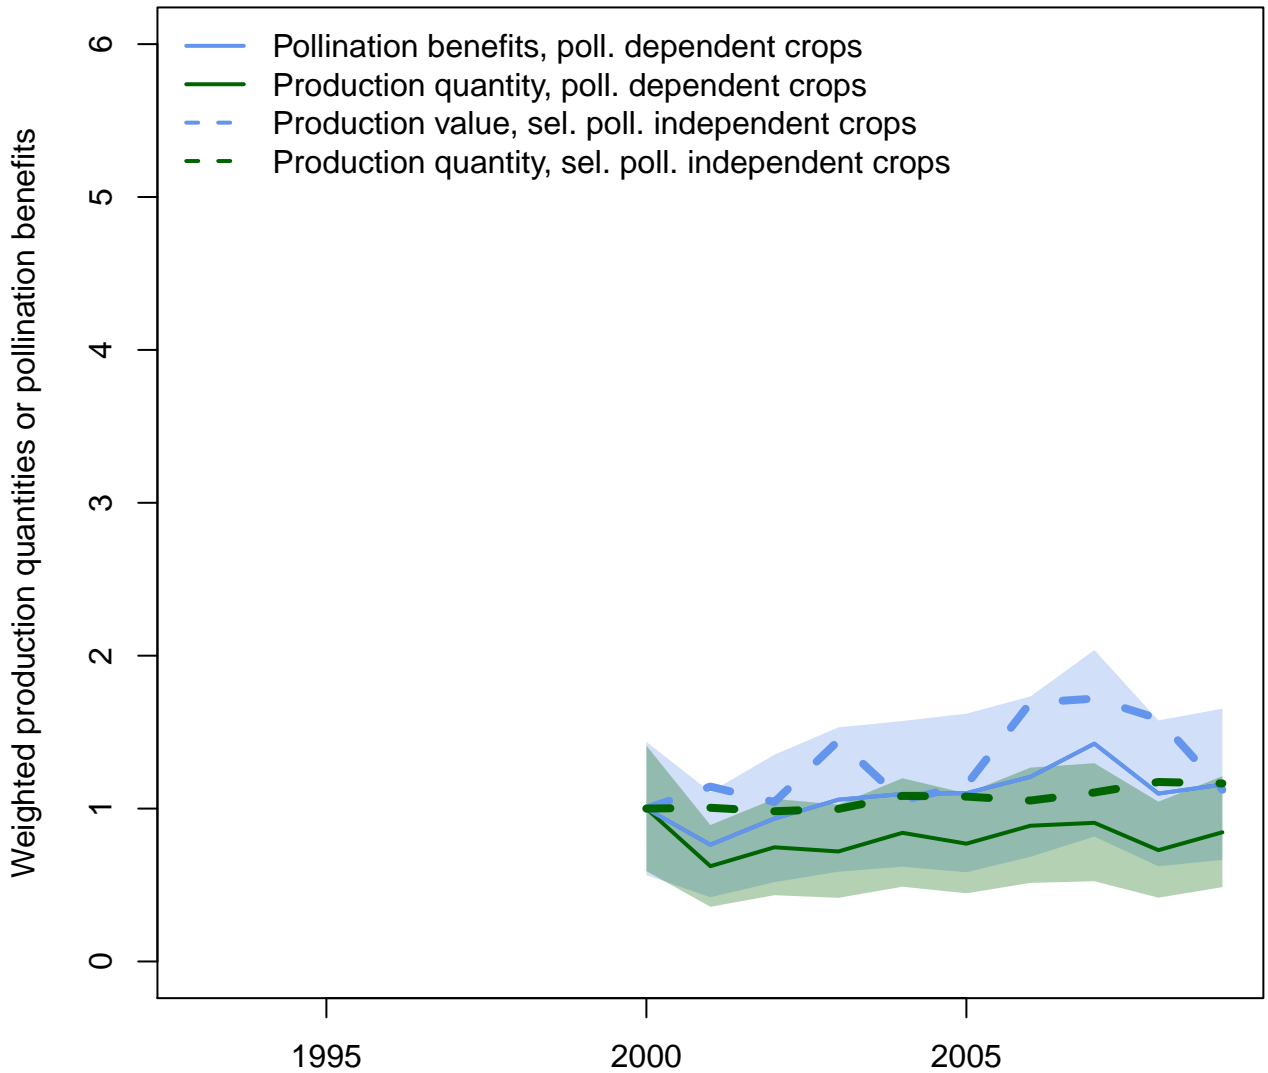



# Belgium

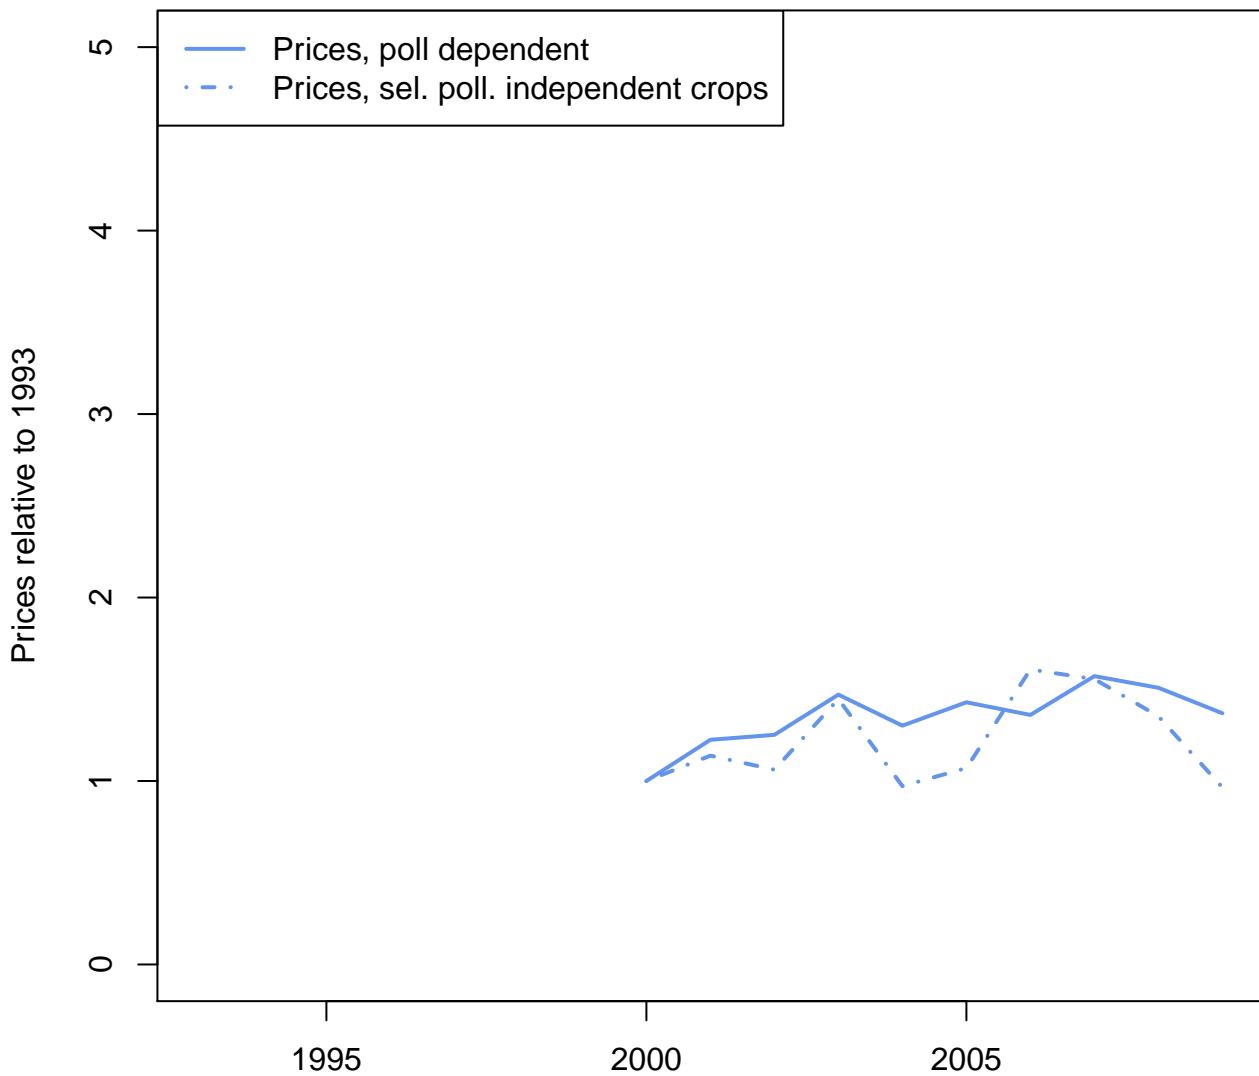

# Belize

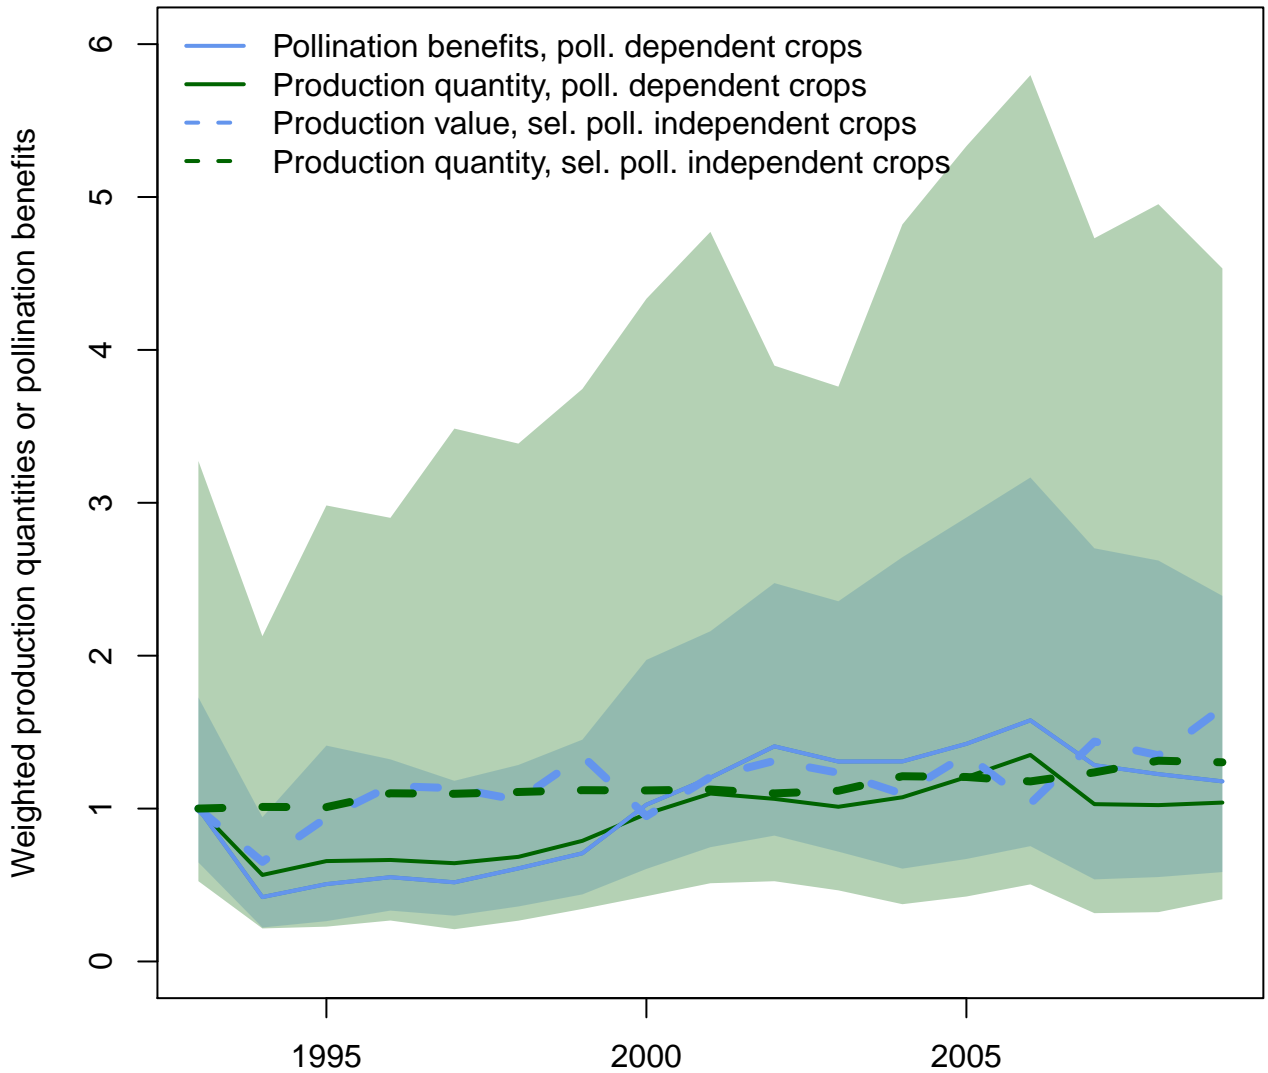

# Belize

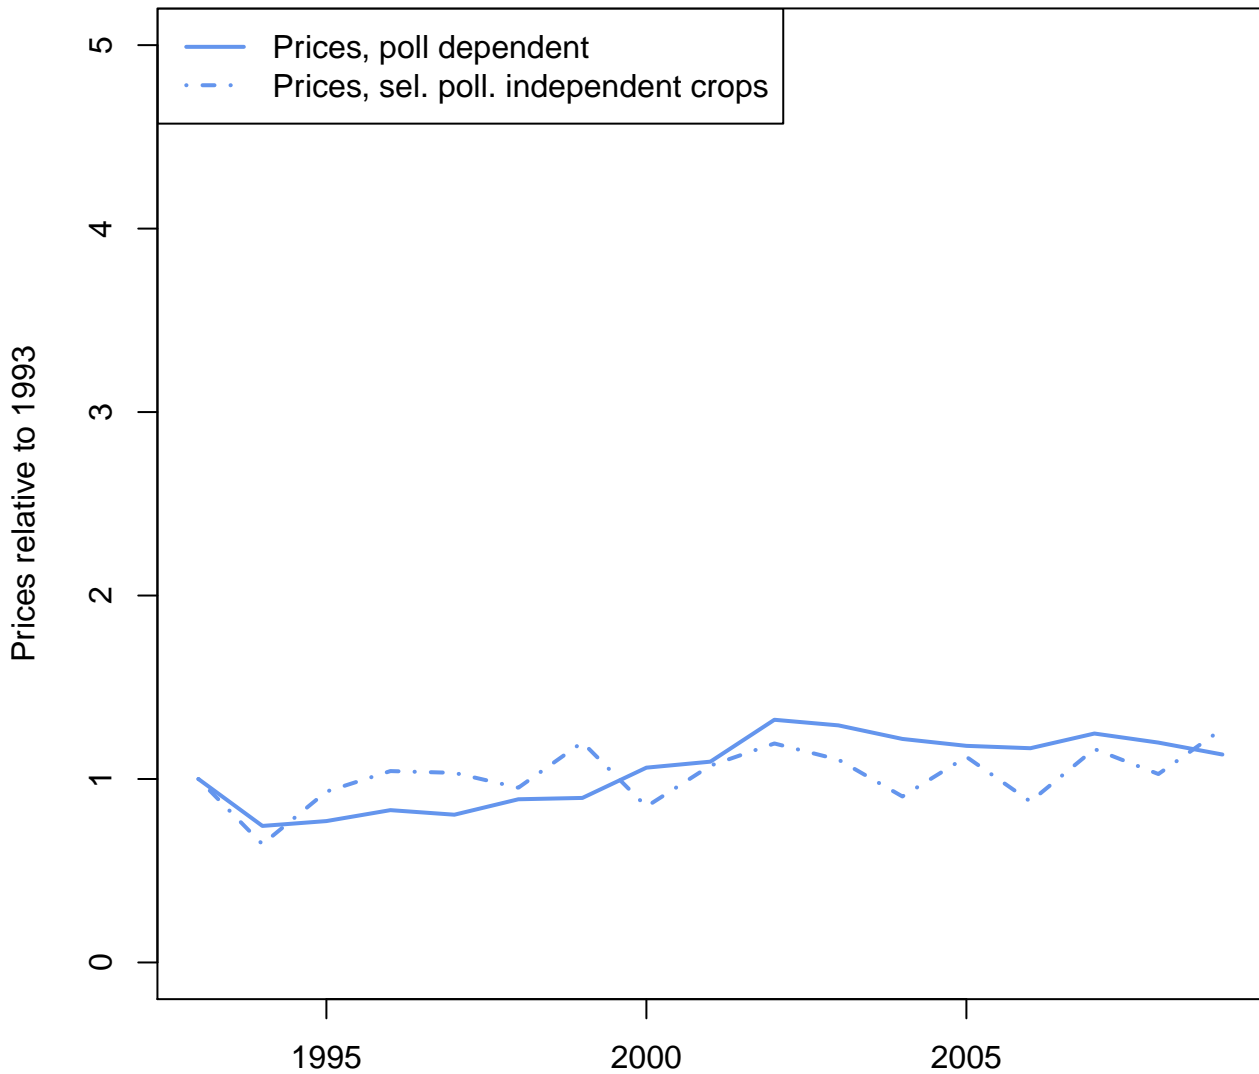

# Bhutan

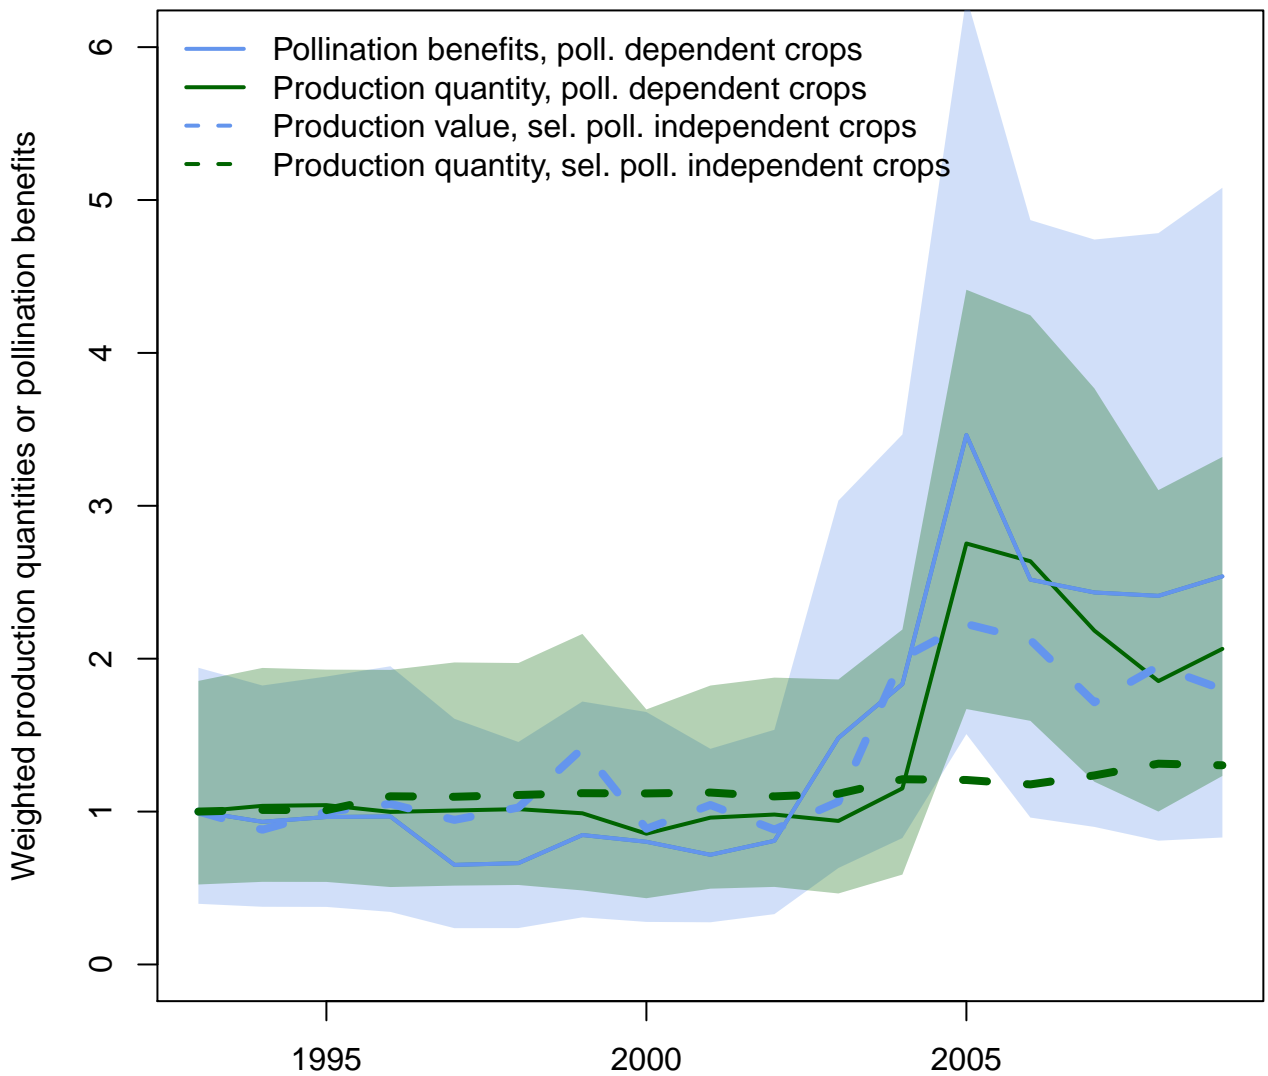

# Bhutan

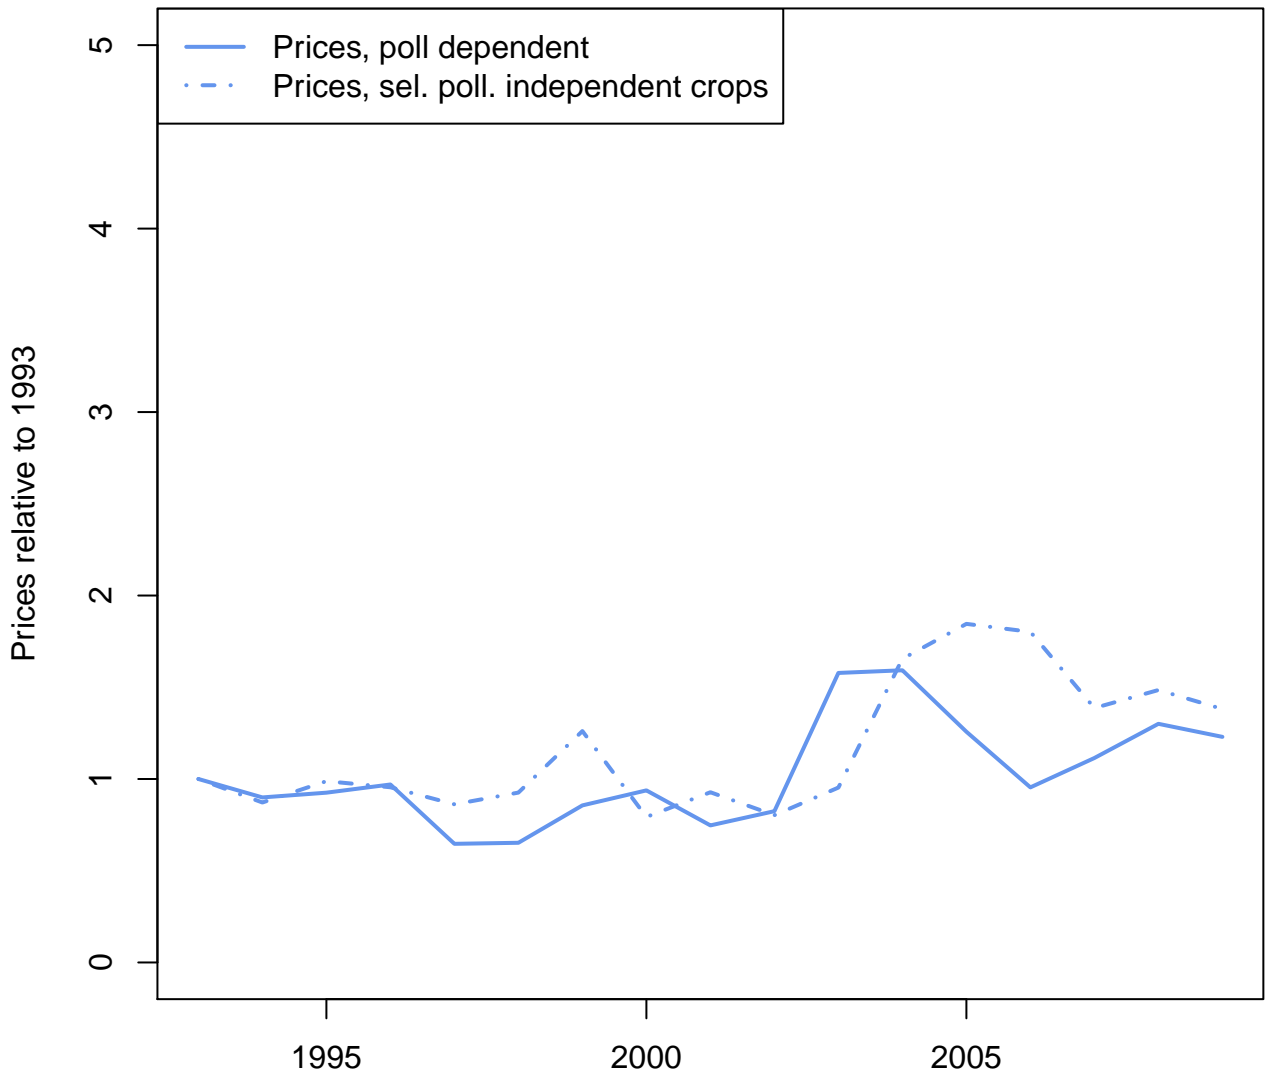

## Bolivia (Plurinational State of)

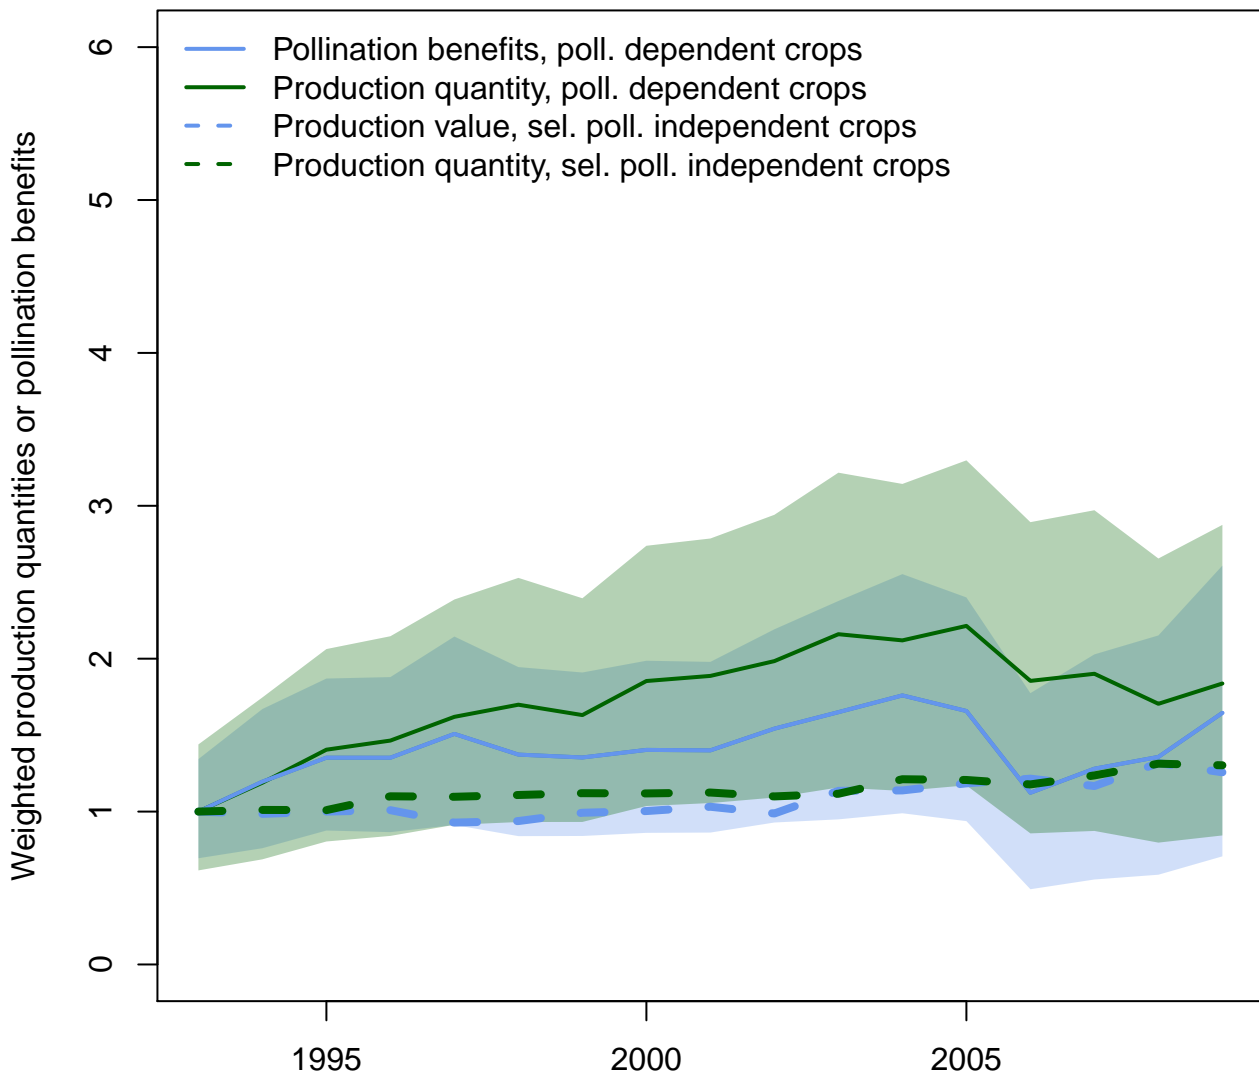

## Bolivia (Plurinational State of)

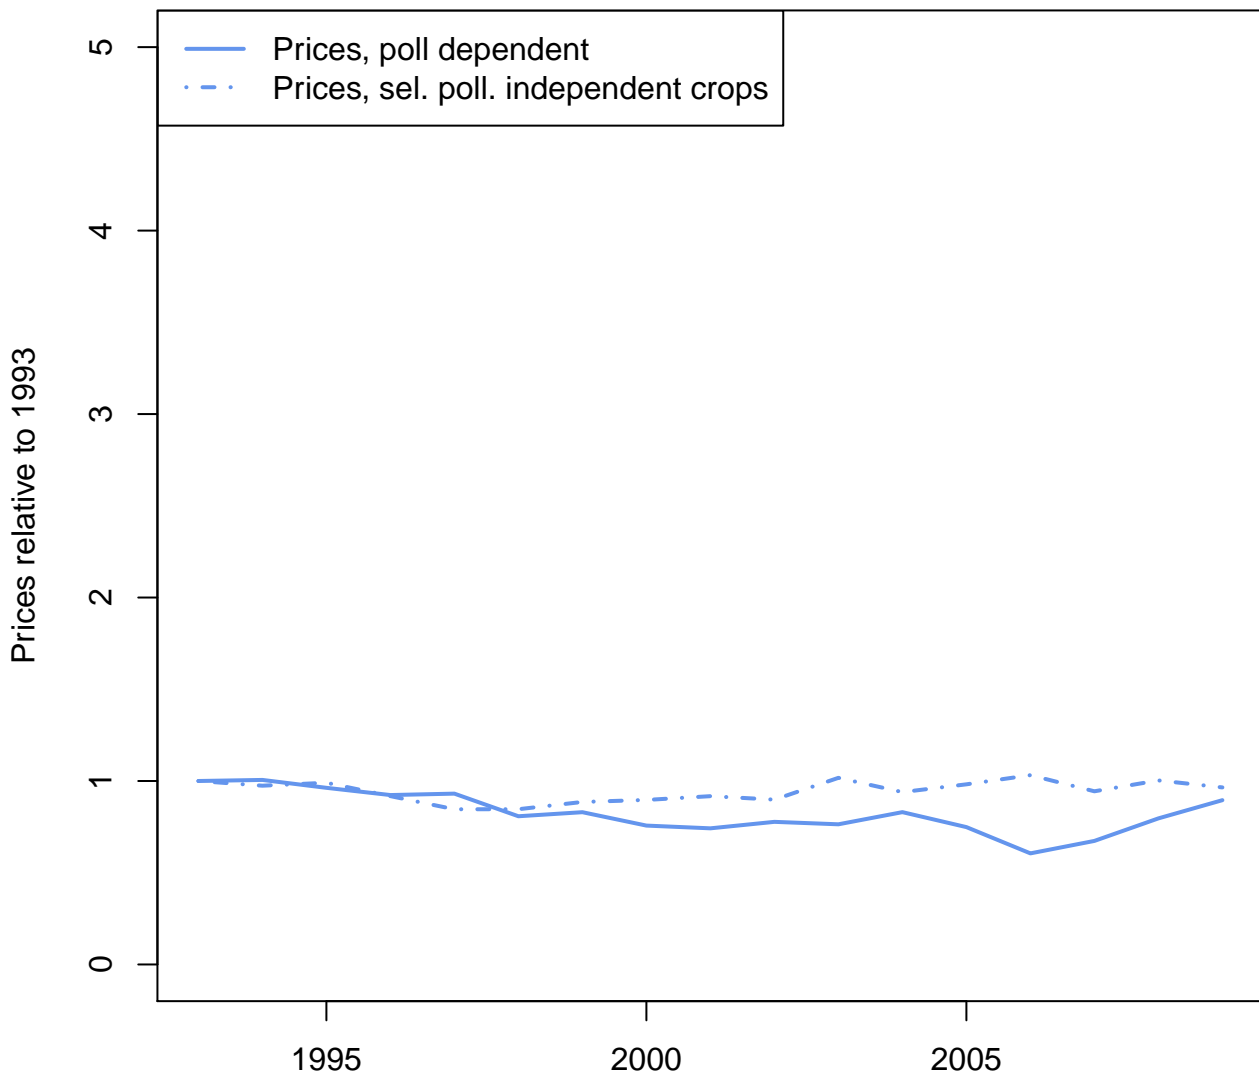

# Bosnia and Herzegovina

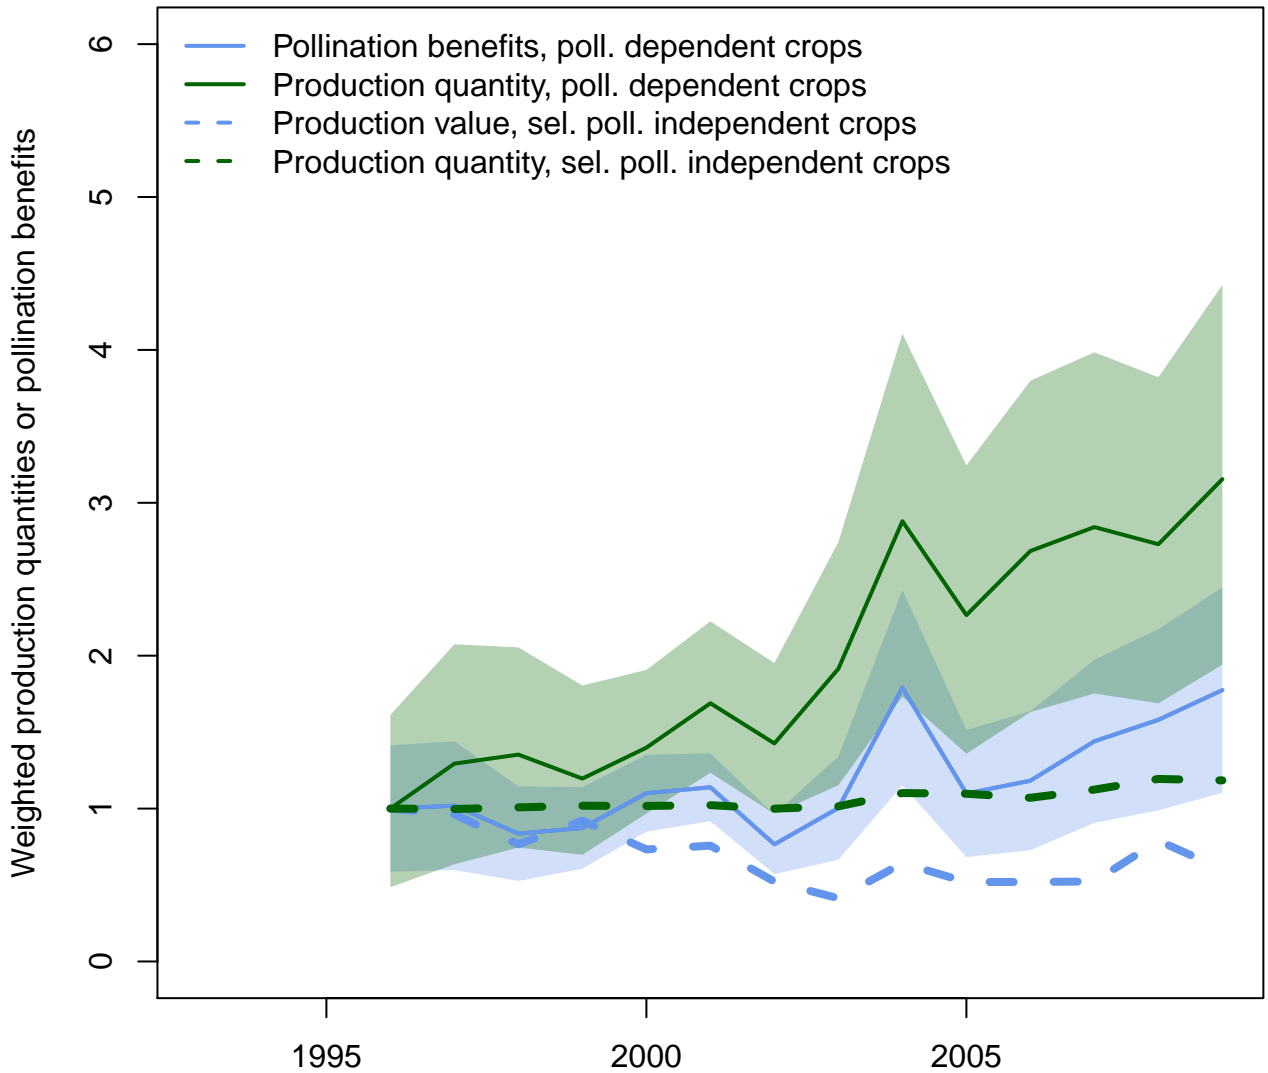



# Bosnia and Herzegovina

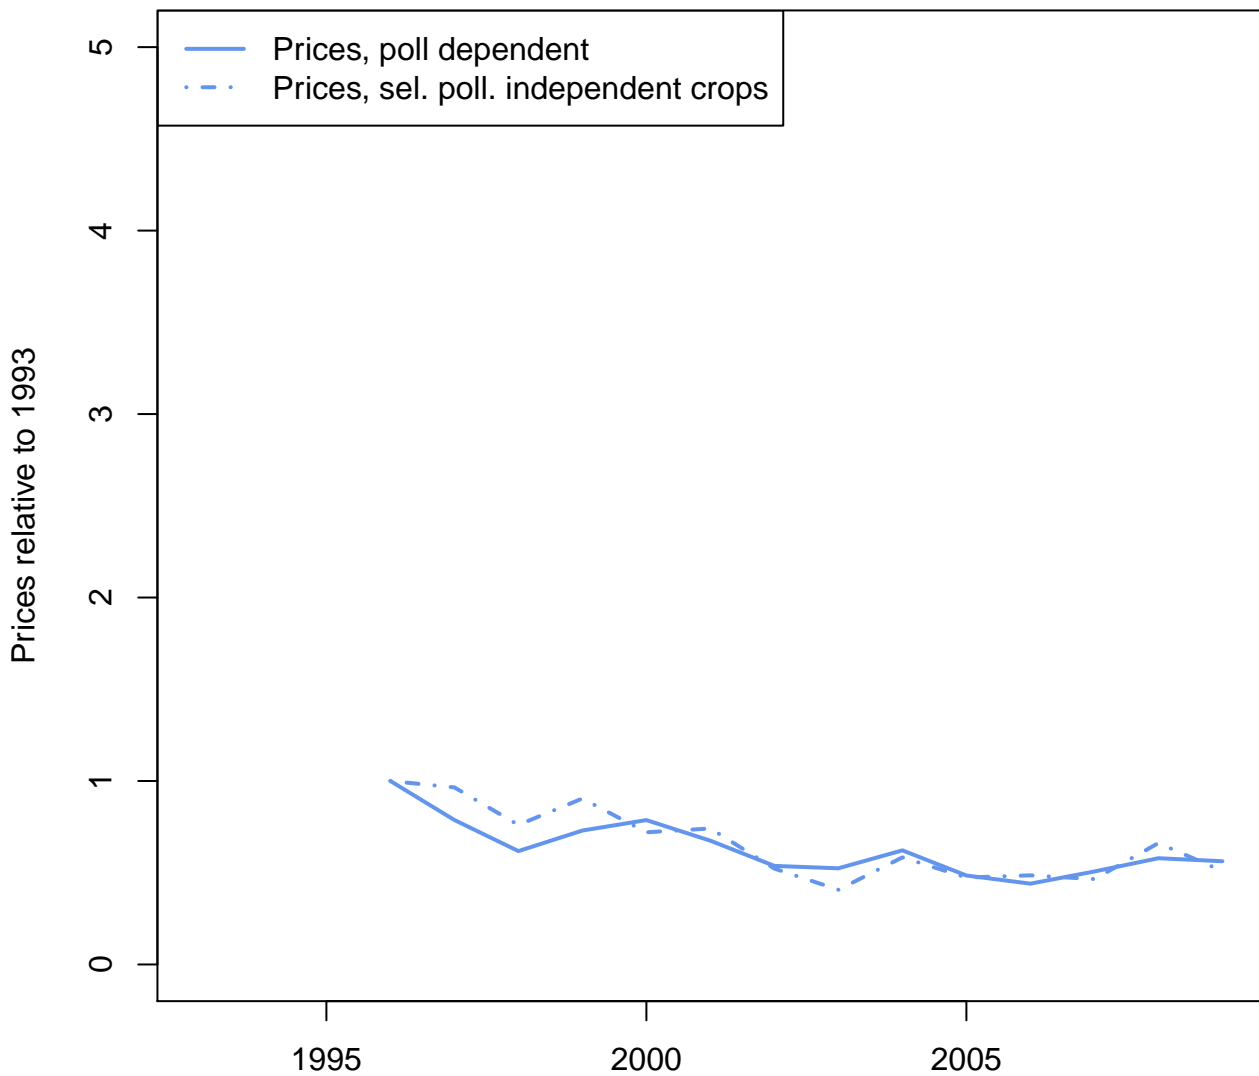

## Brazil

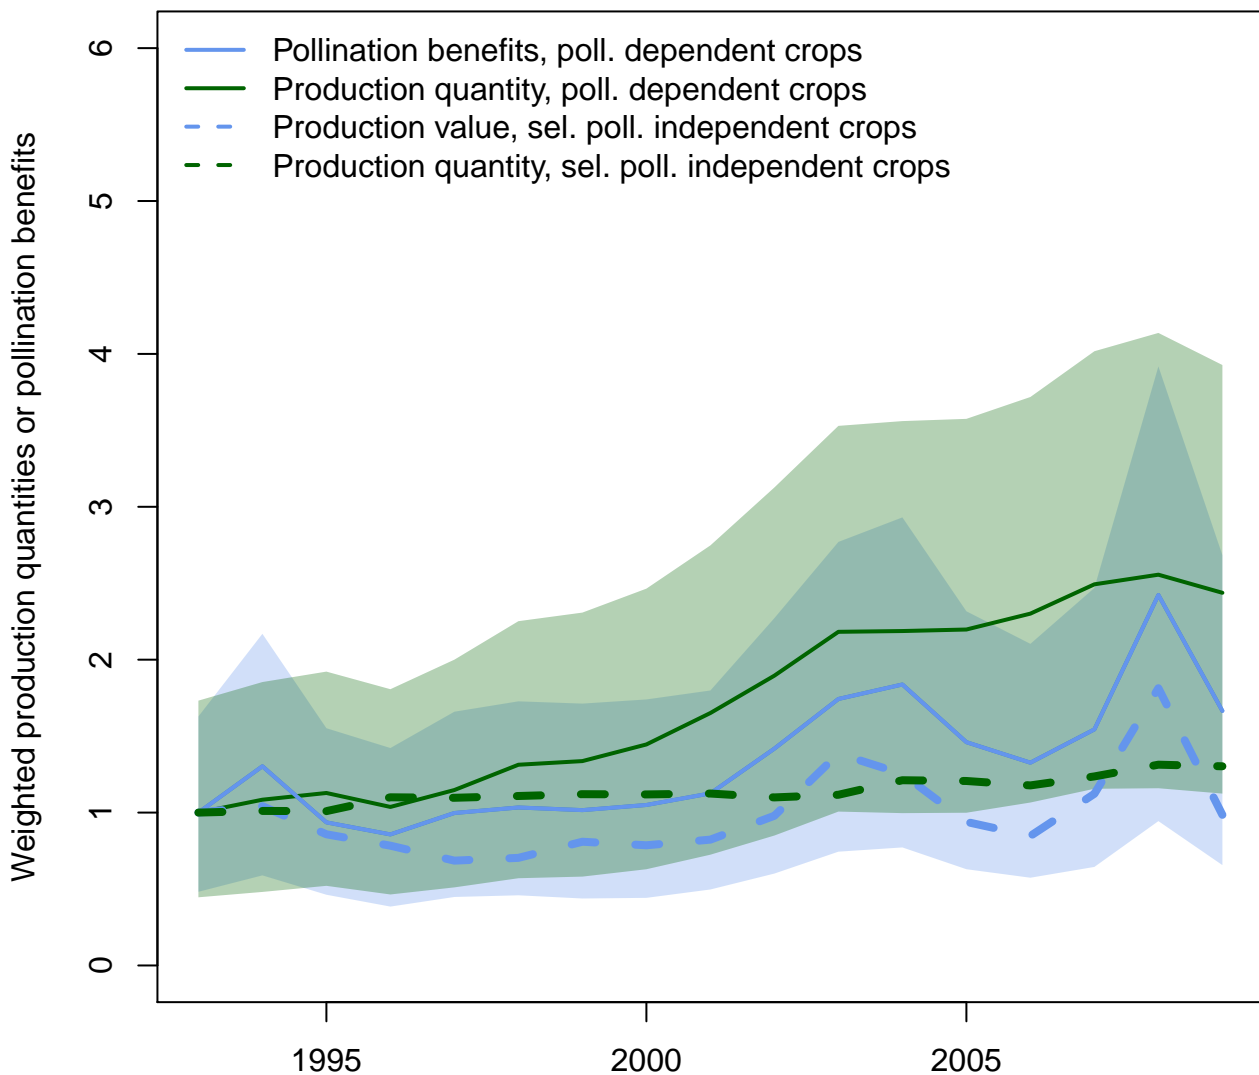

# Brazil

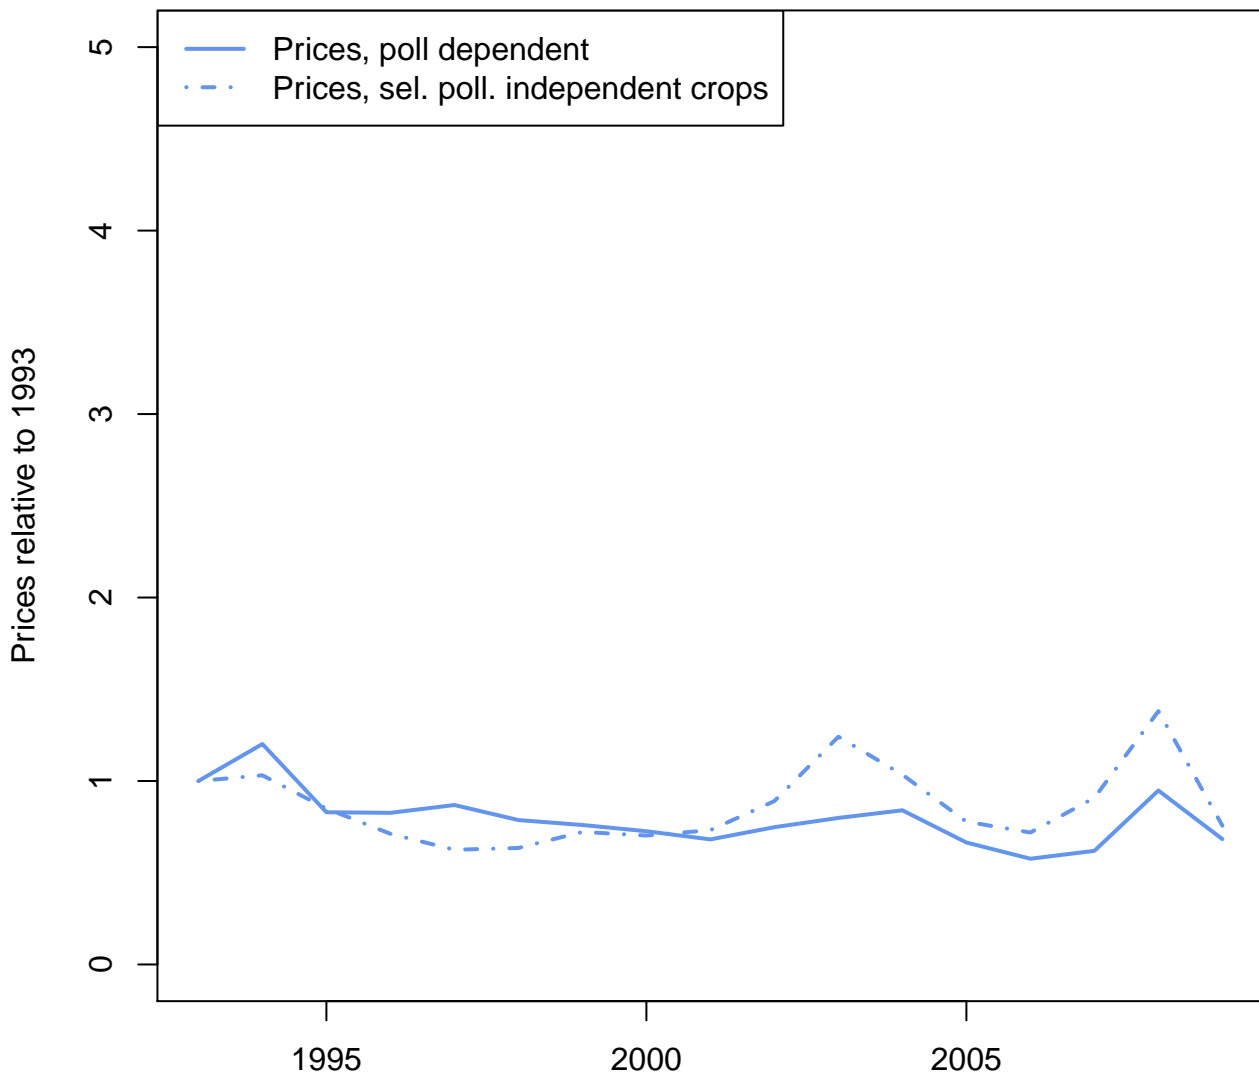

# Bulgaria

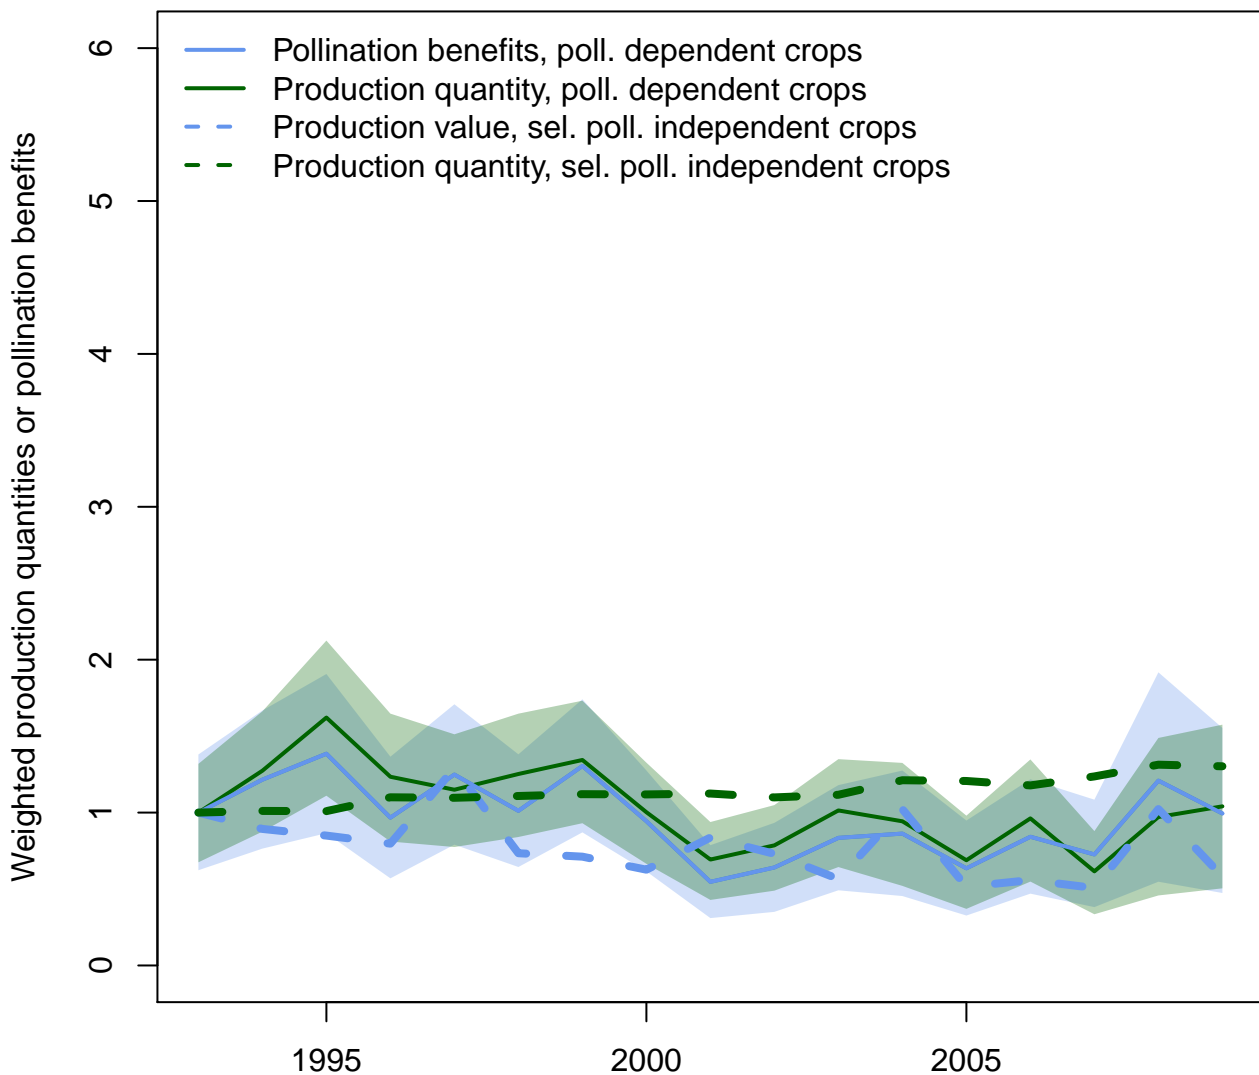

# Bulgaria

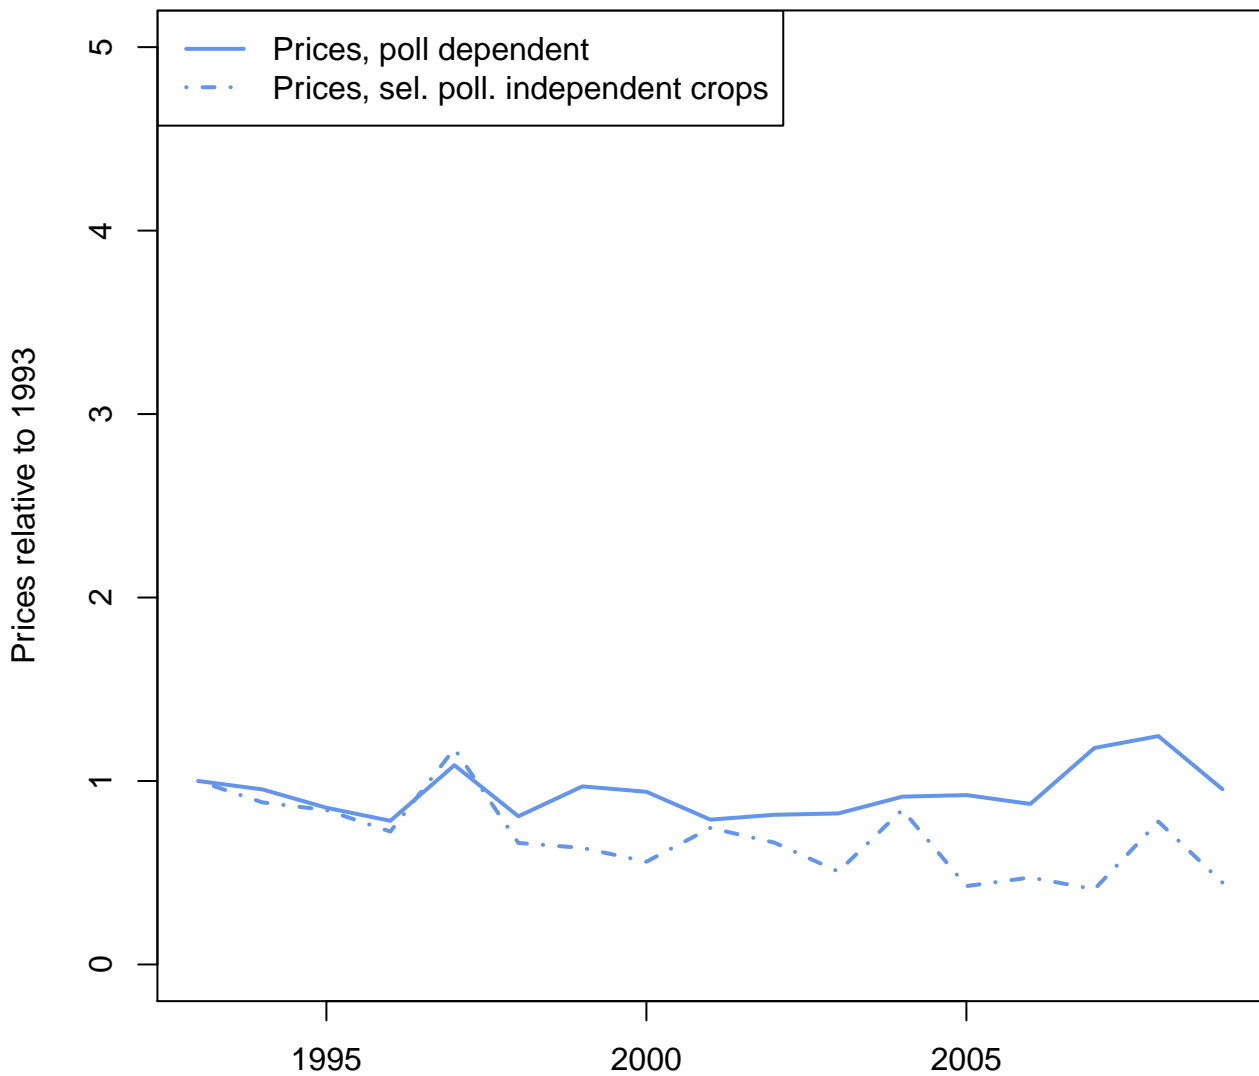

# Burkina Faso

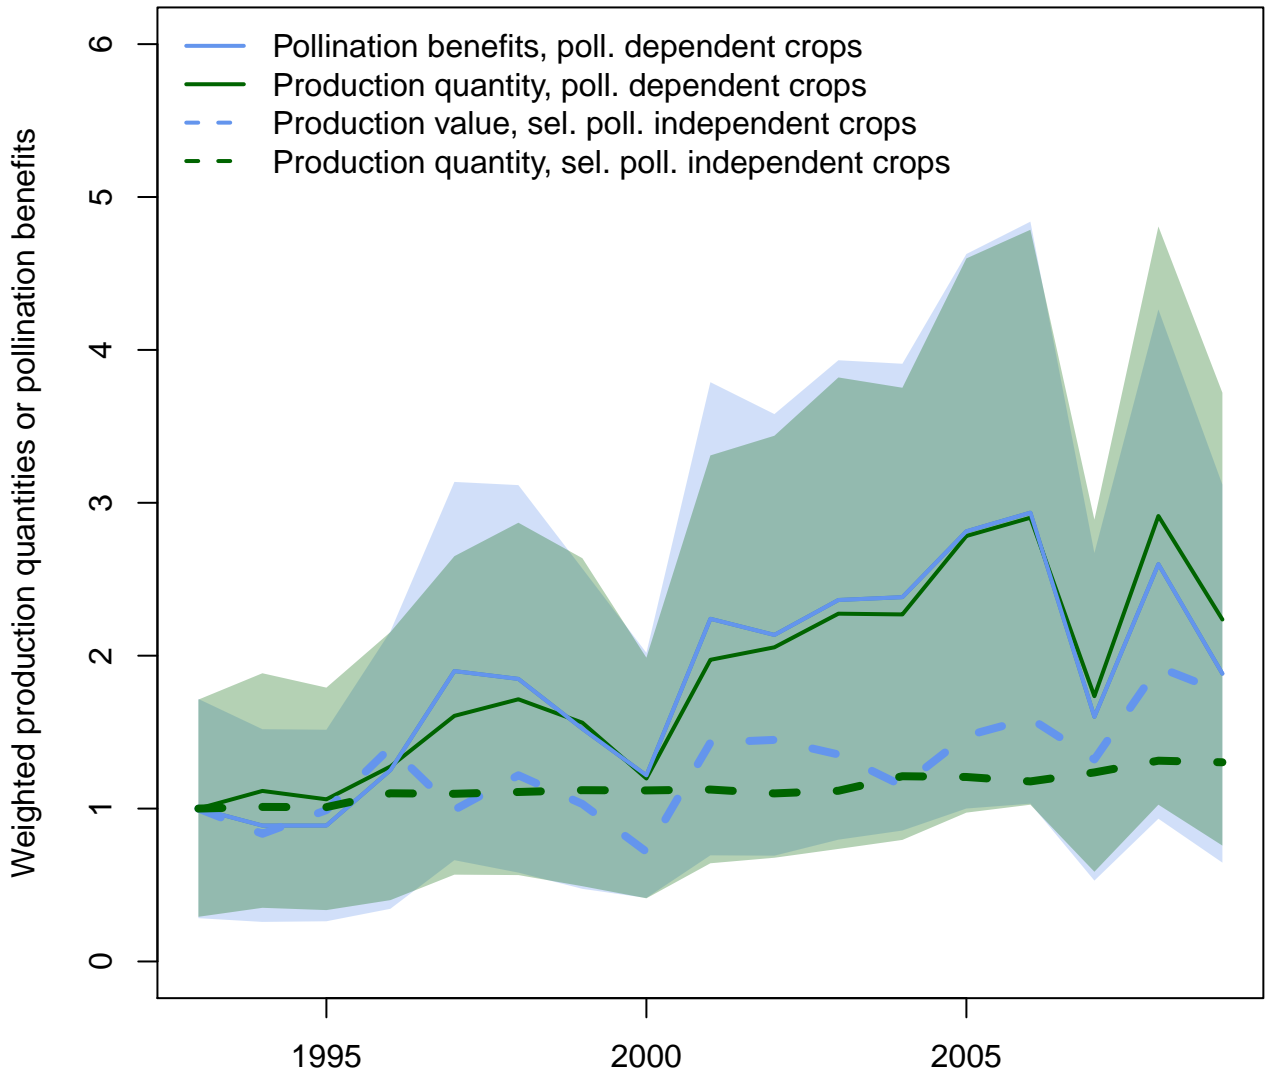

# Burkina Faso

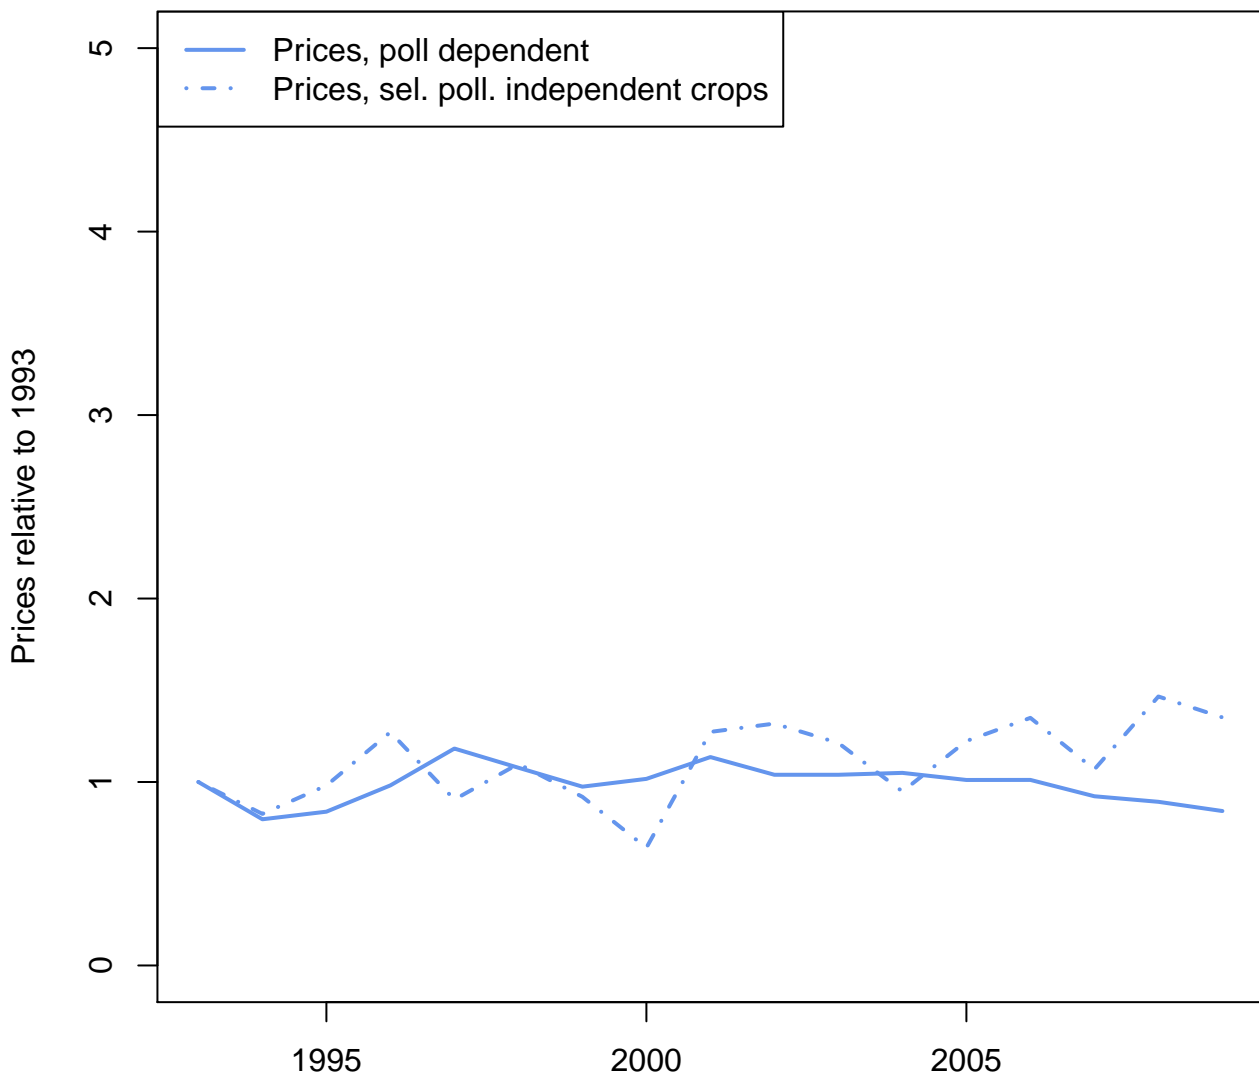

# Burundi

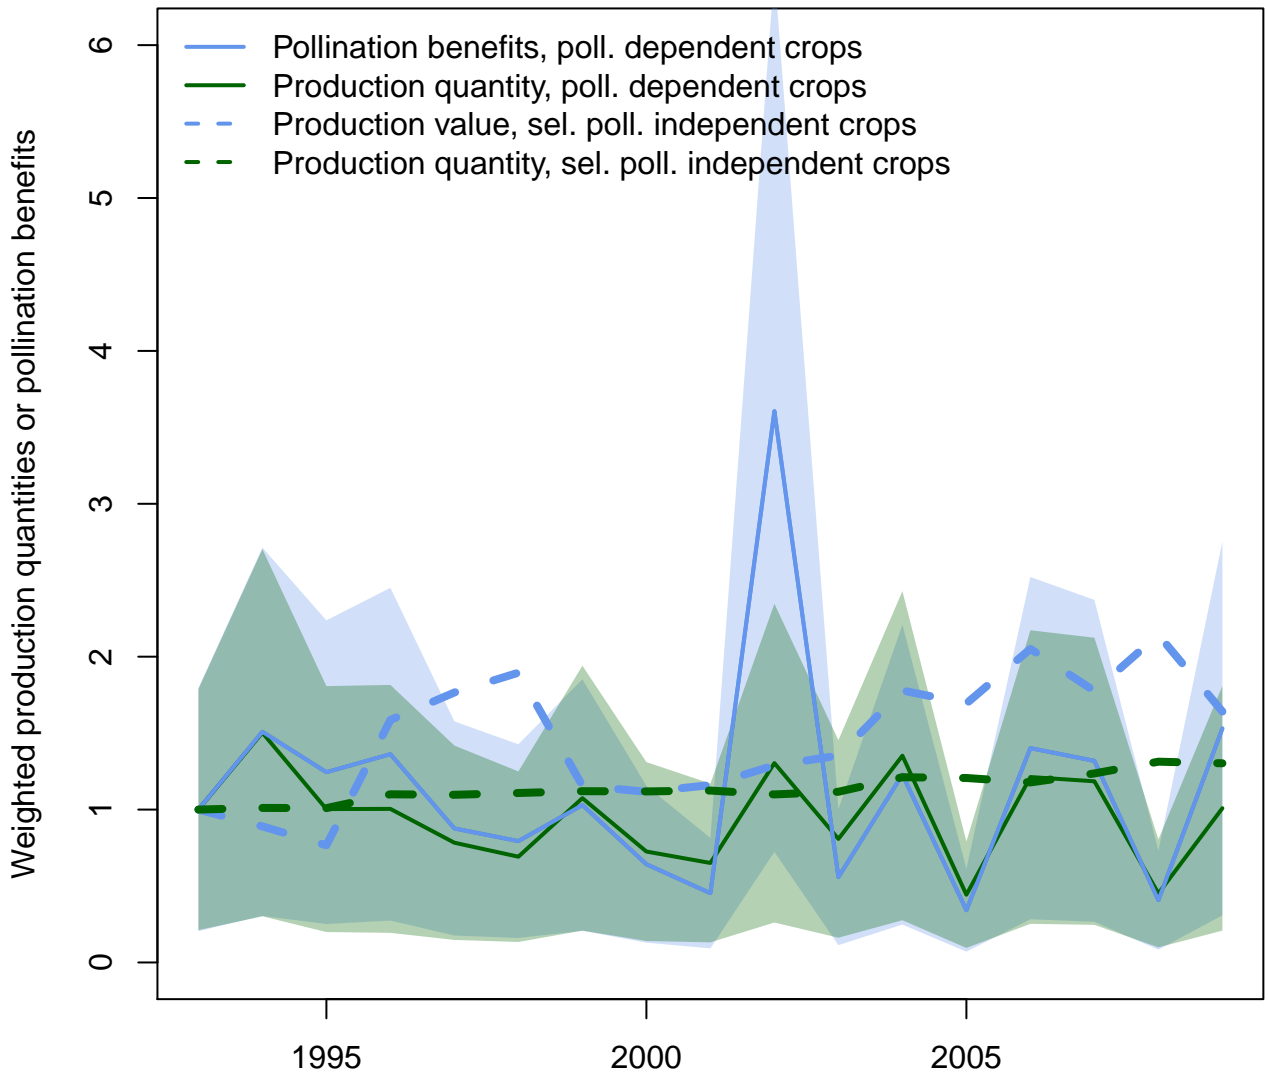



# Burundi

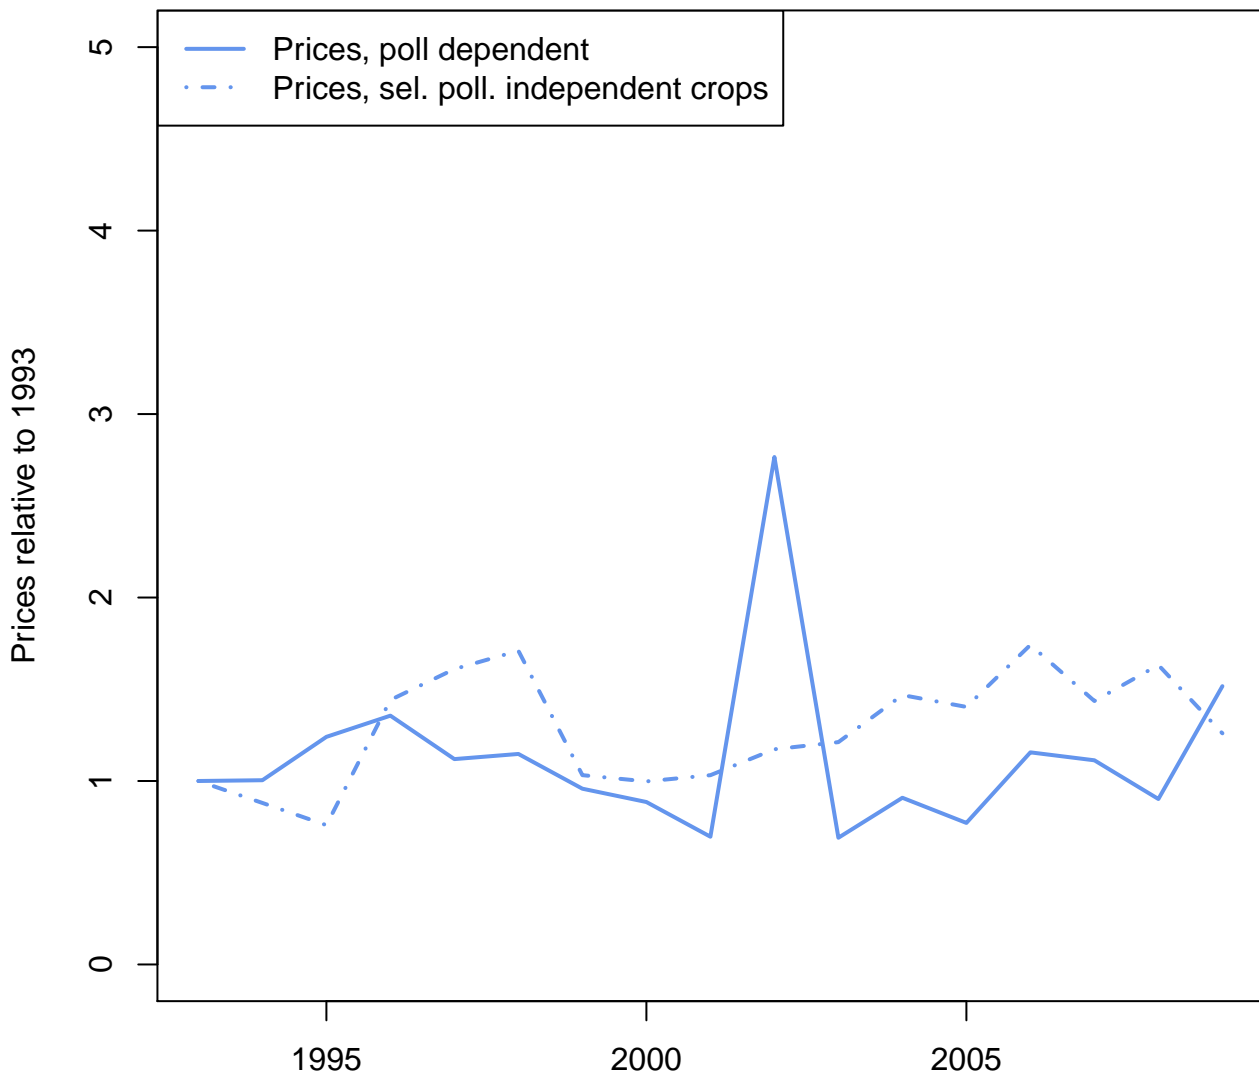

# Cambodia

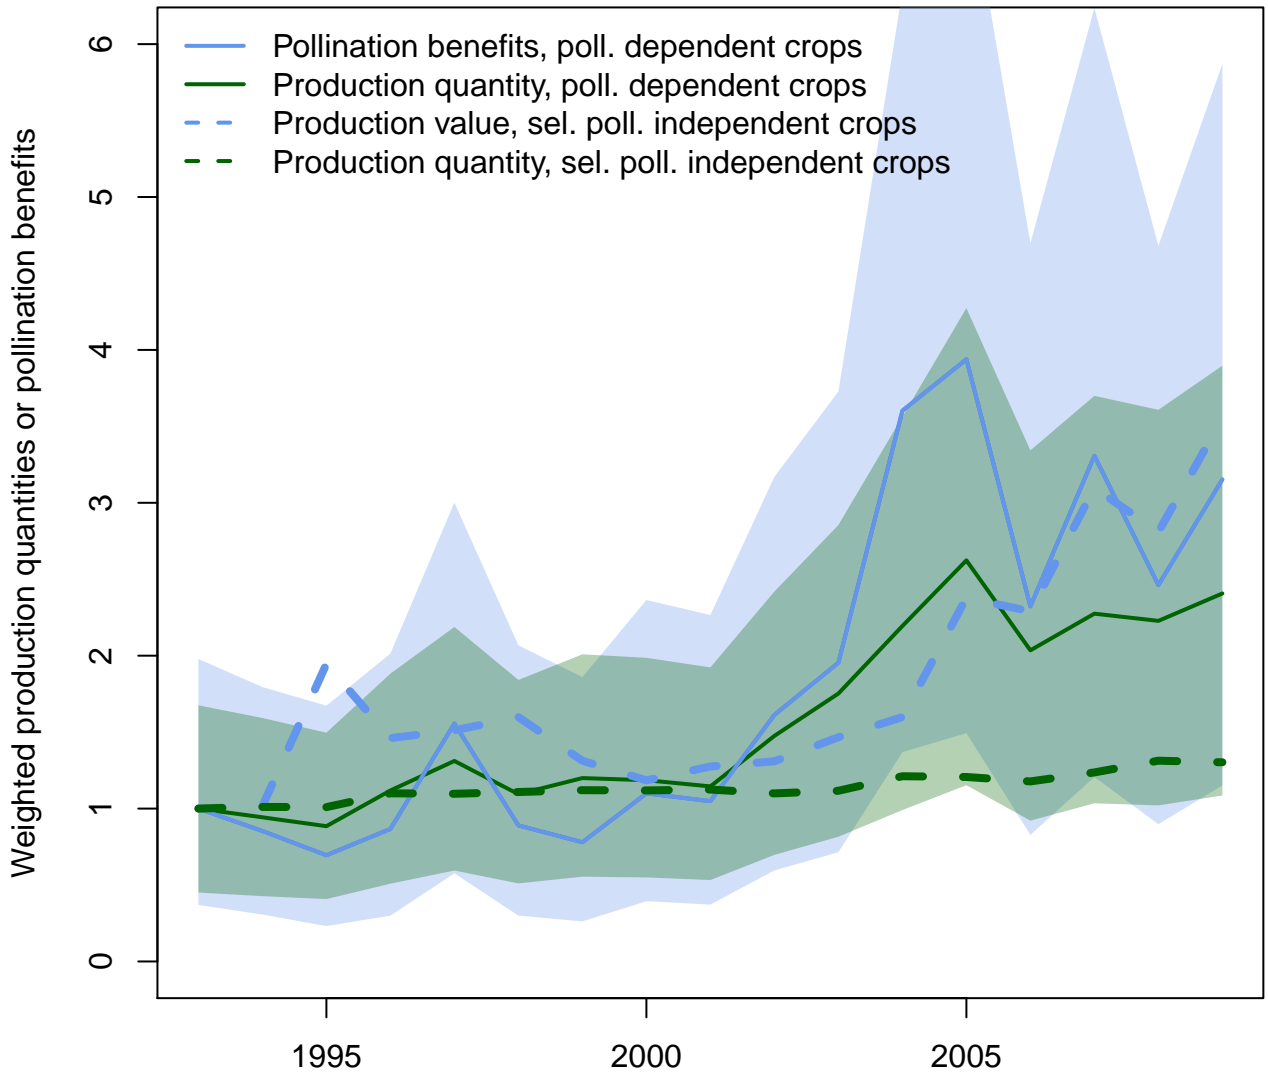

# Cambodia

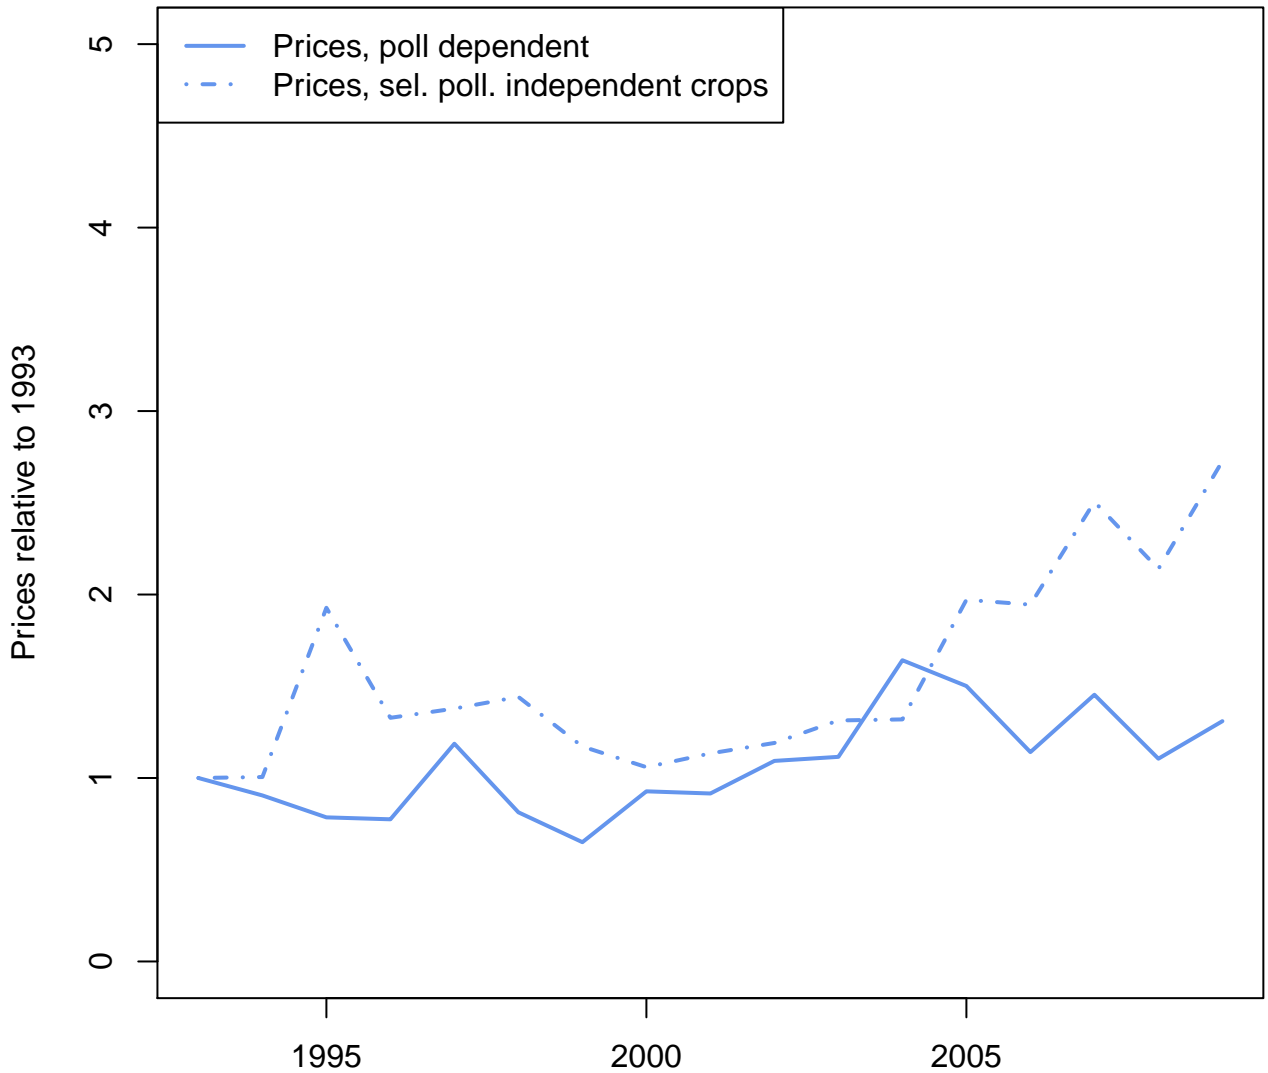

# Cameroon

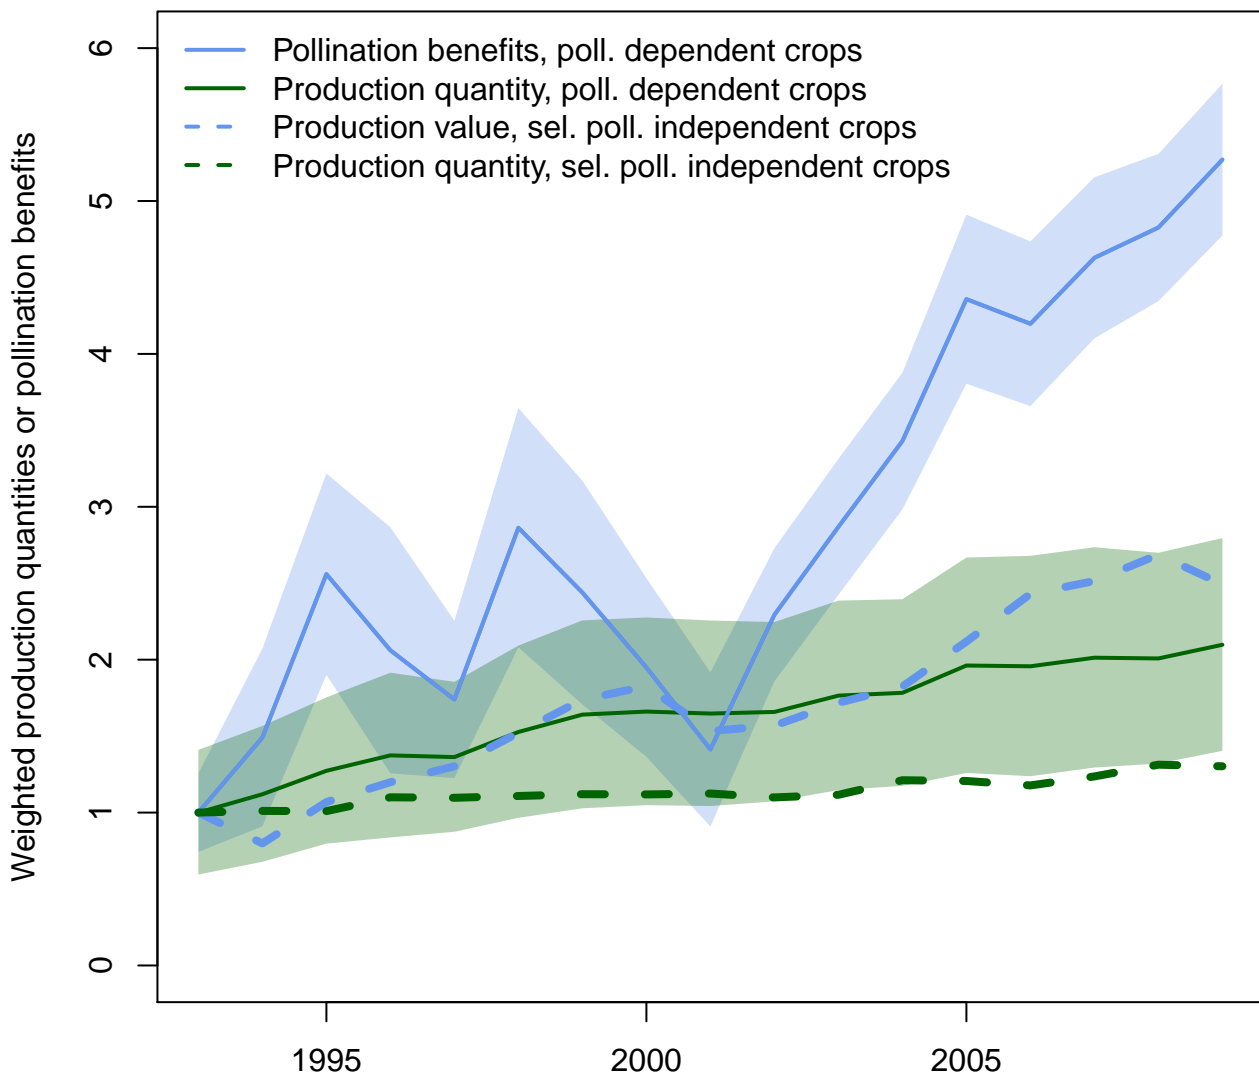

# Cameroon

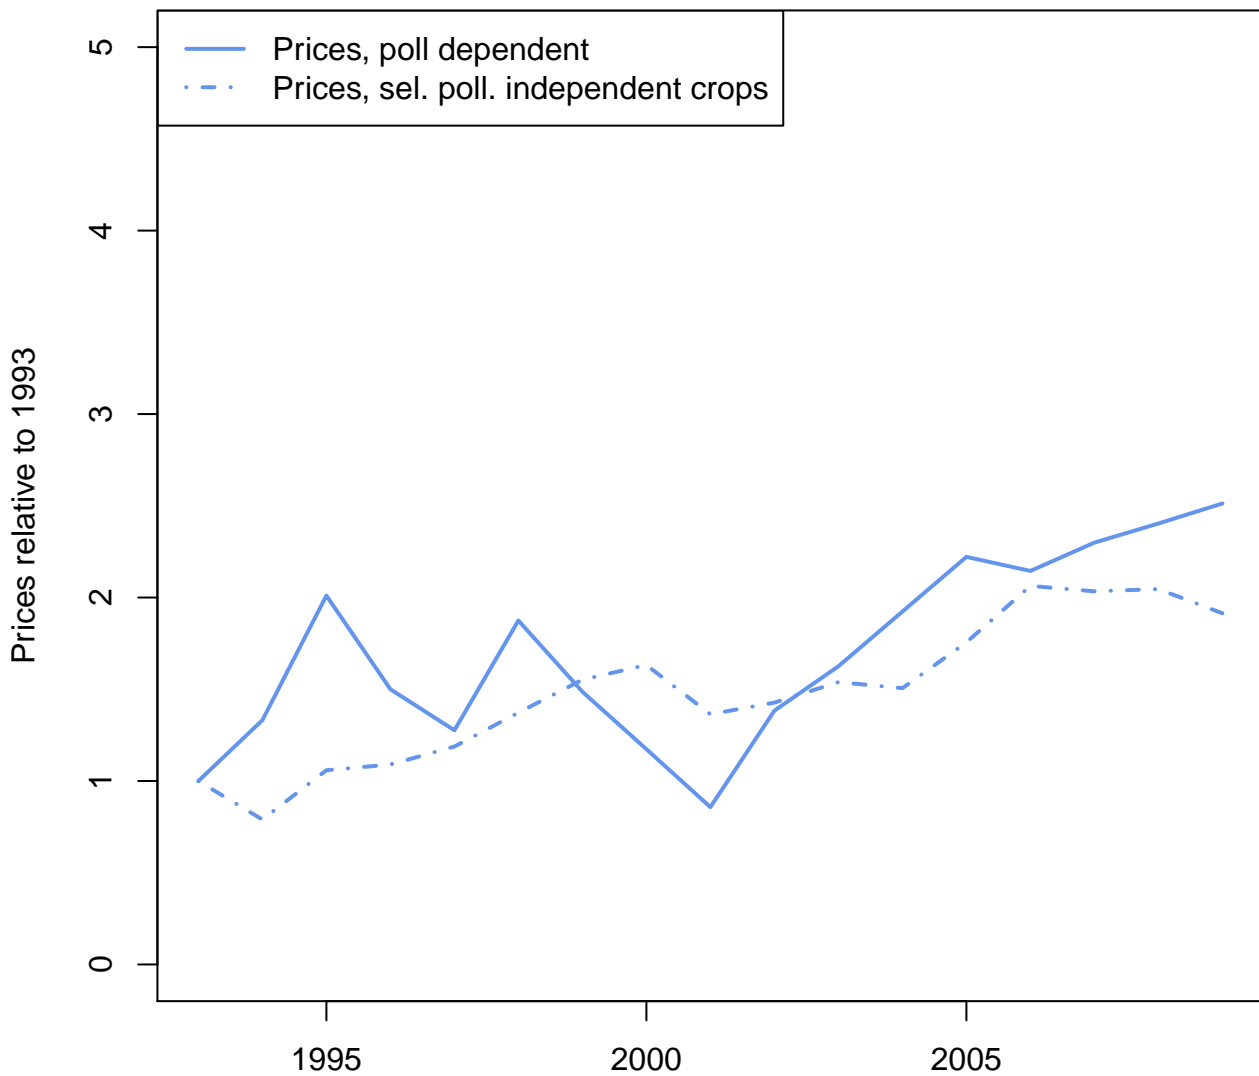

# Canada

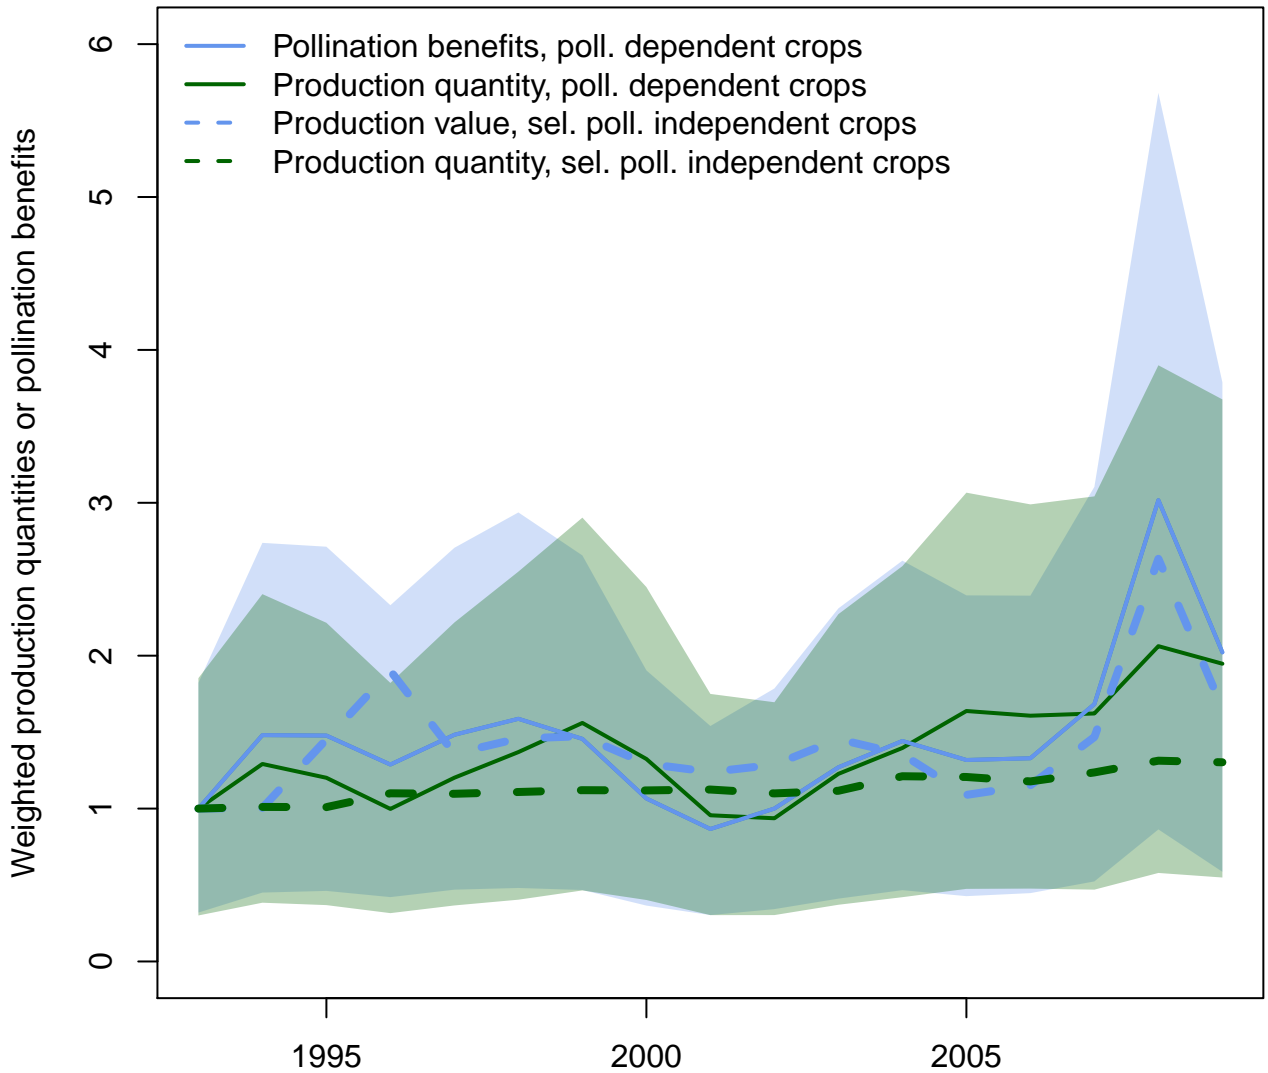

# Canada

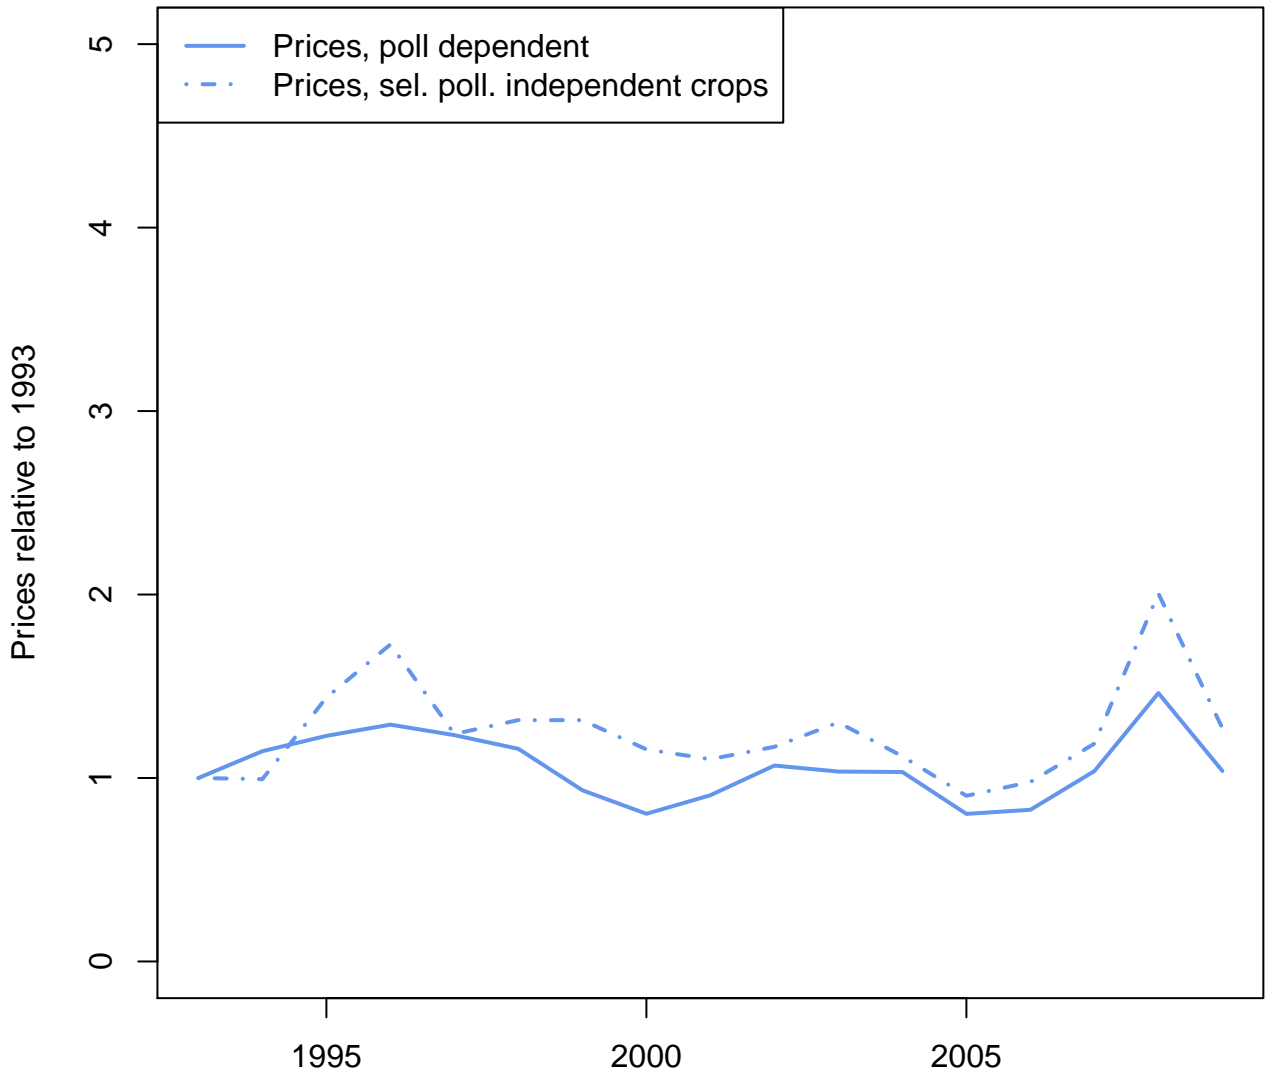

# Cape Verde

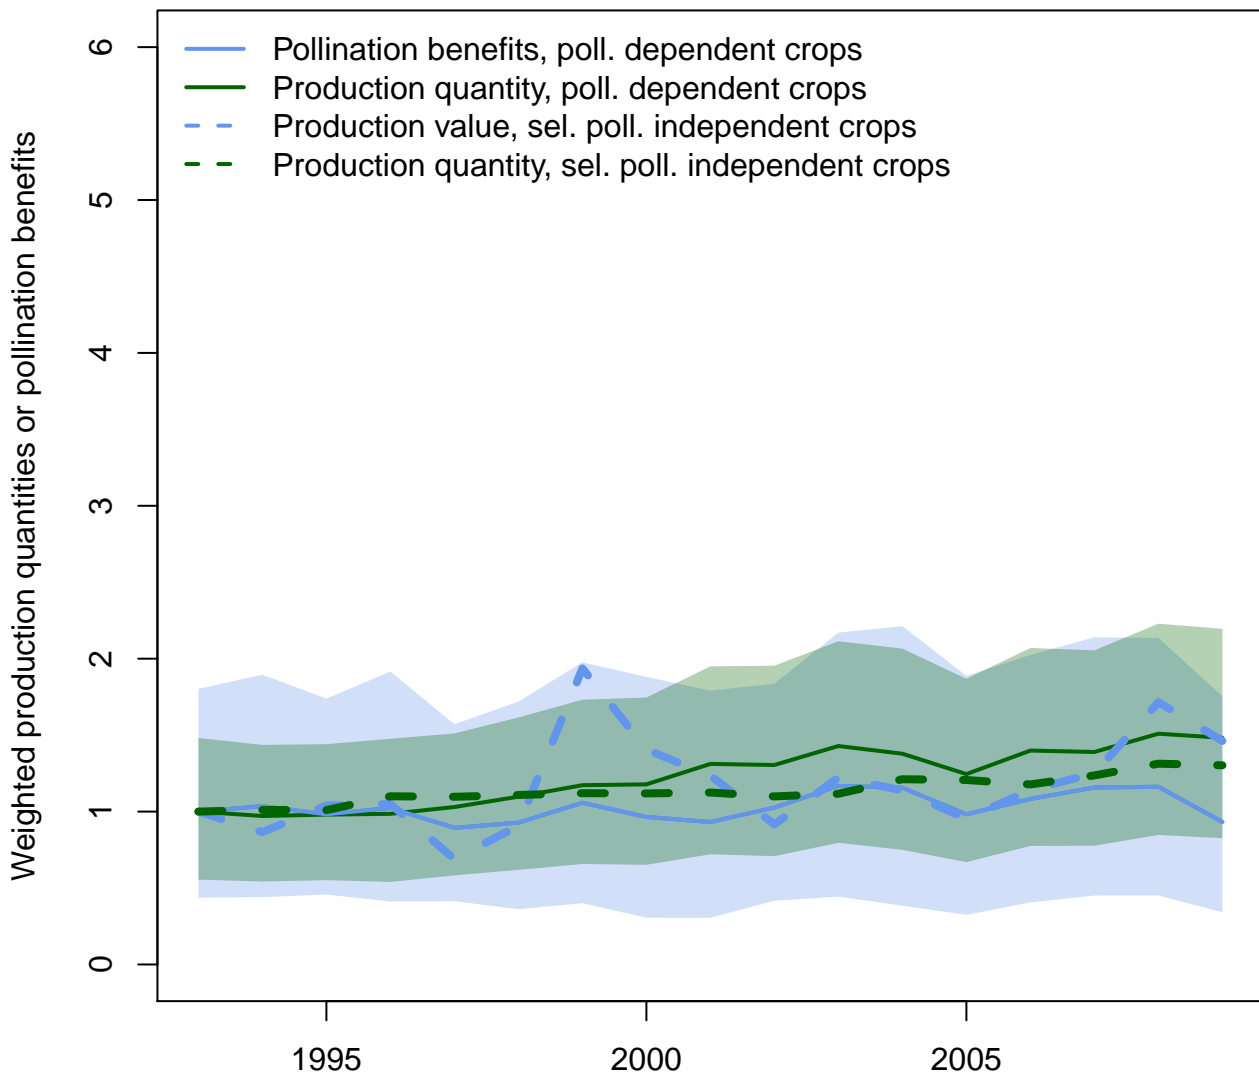



# Cape Verde

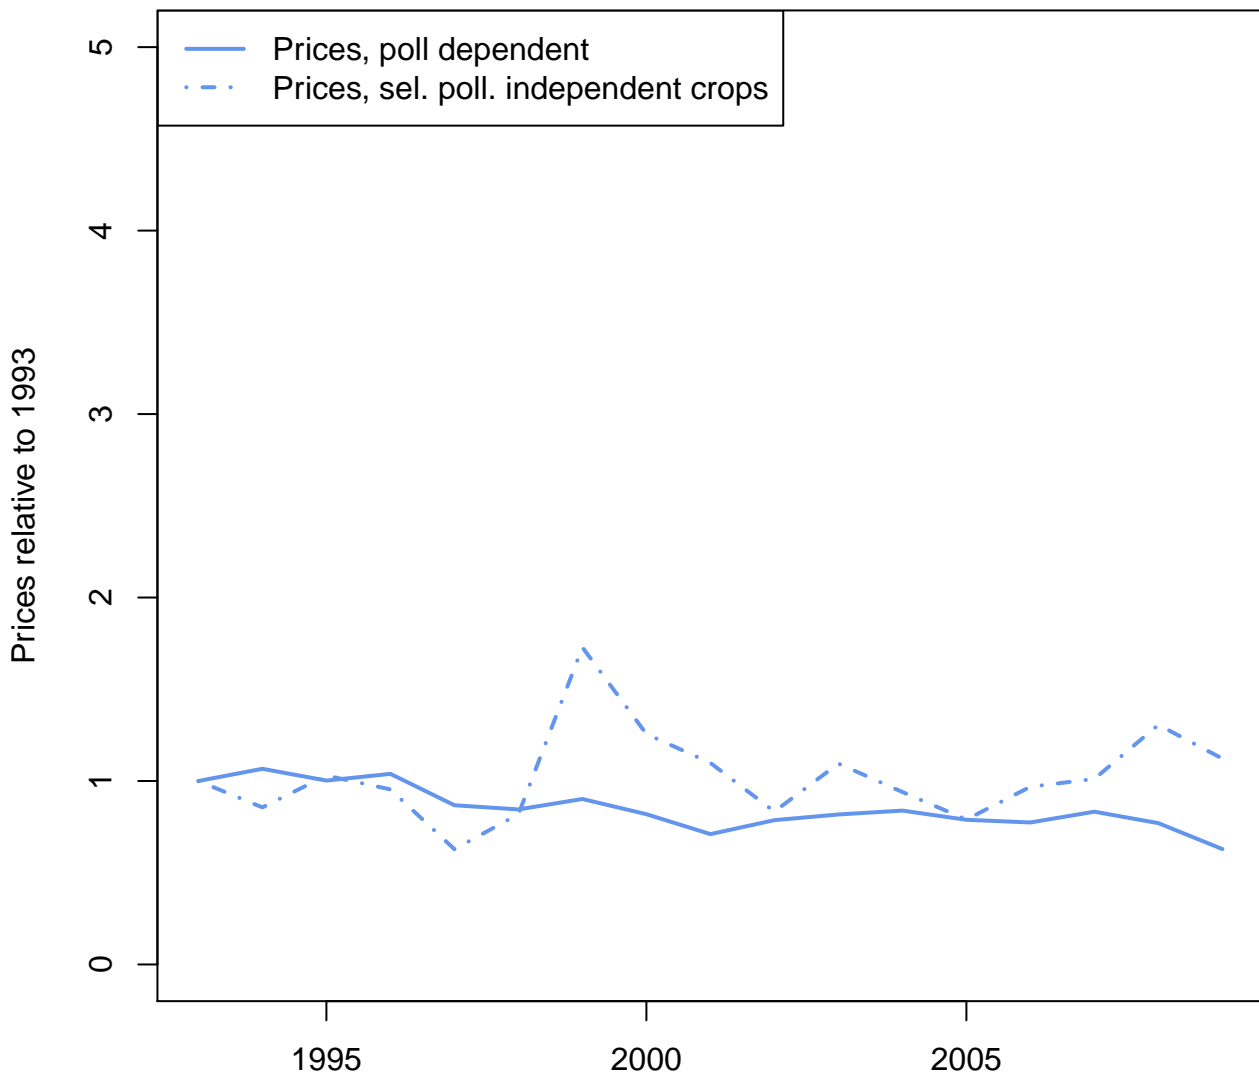

# Chile

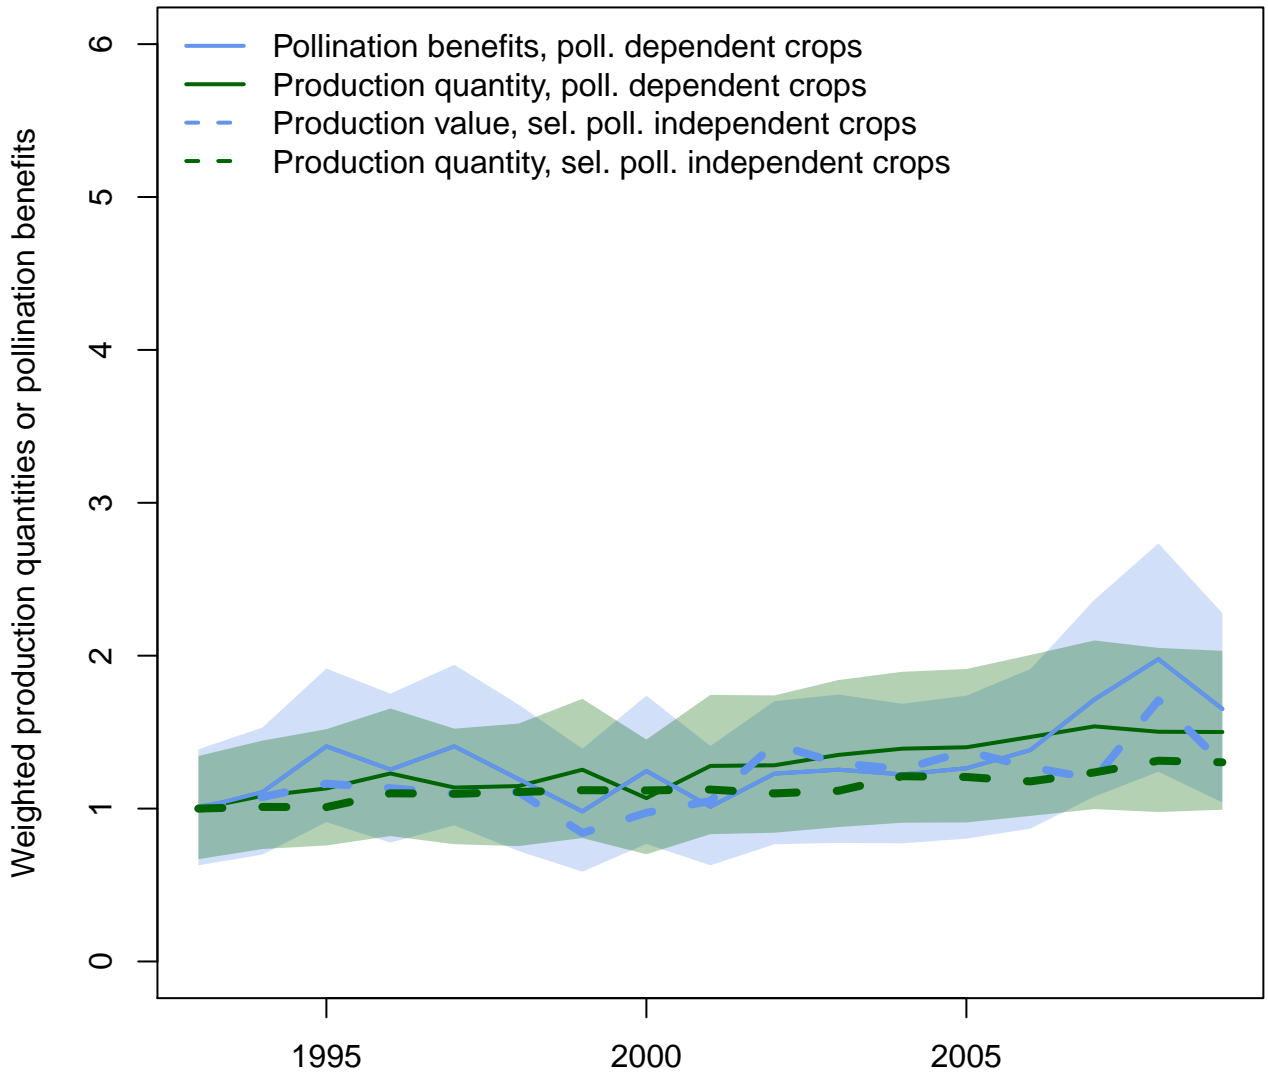

# Chile

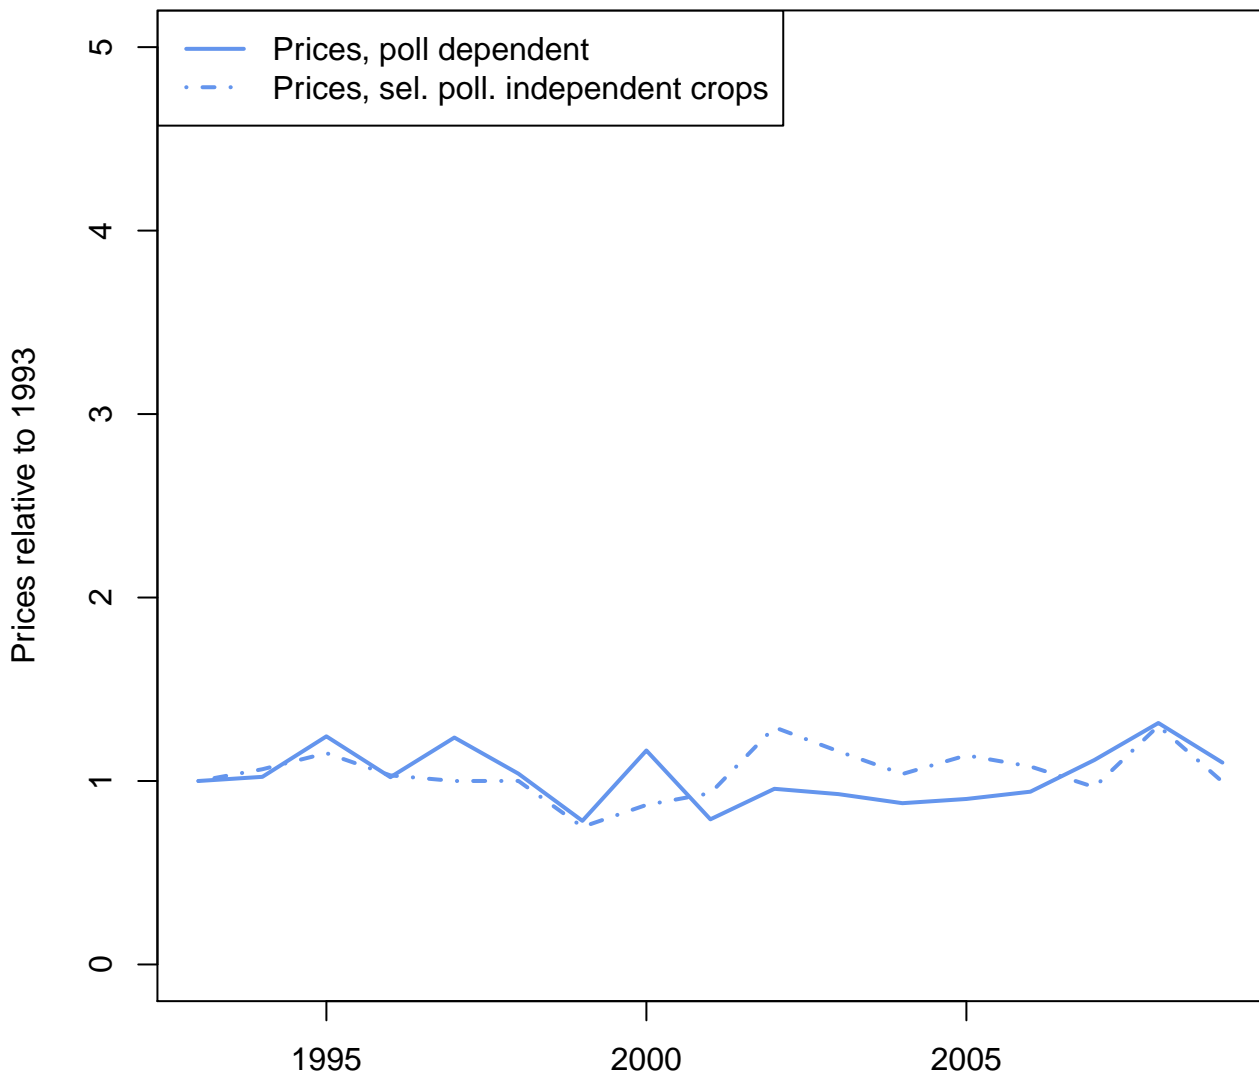

# China

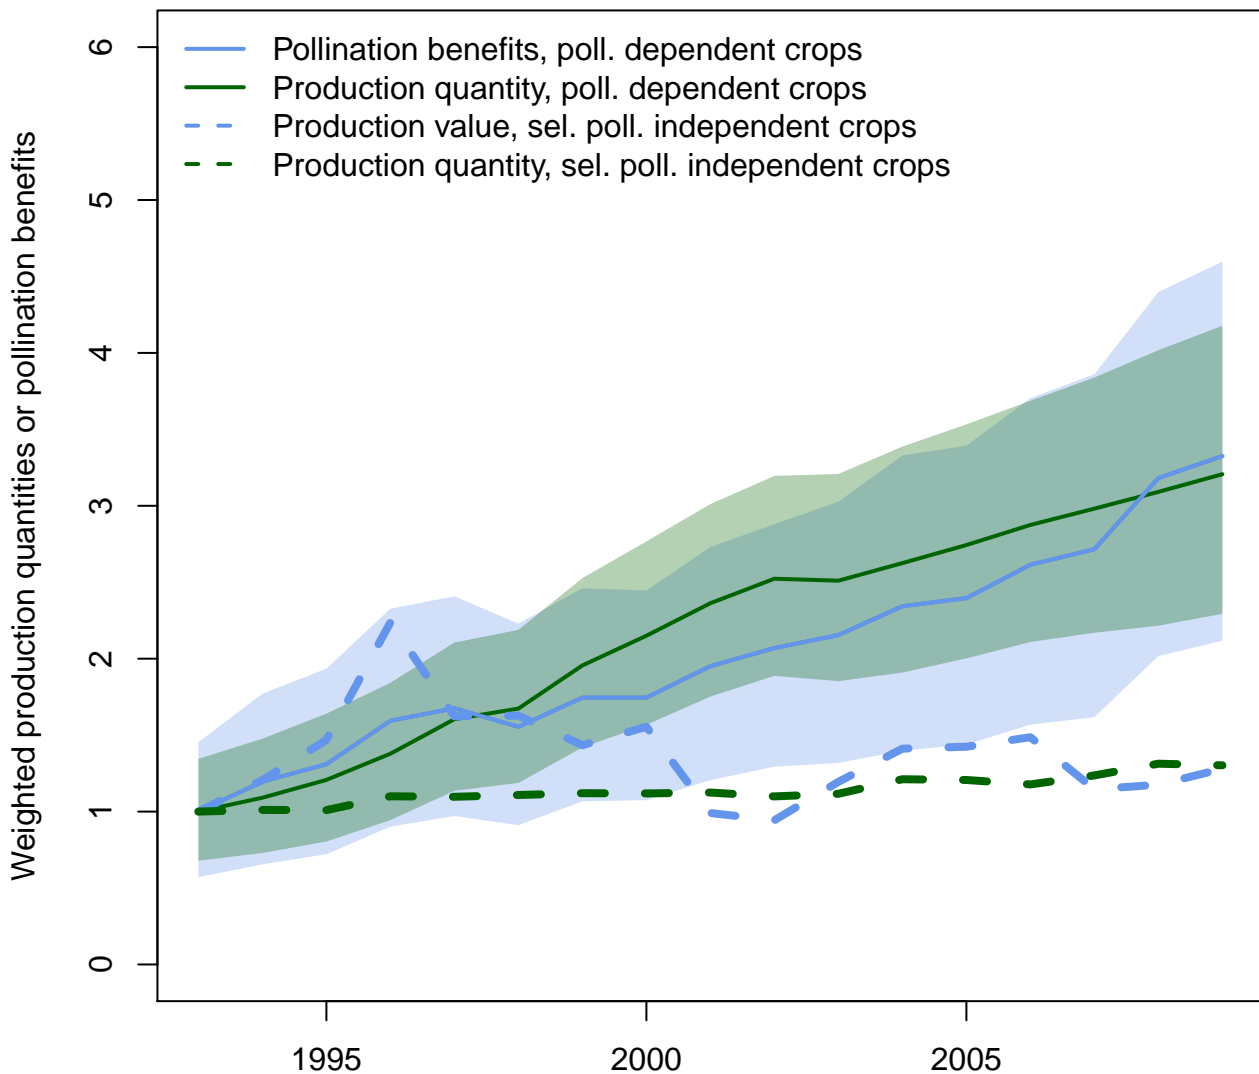

# China

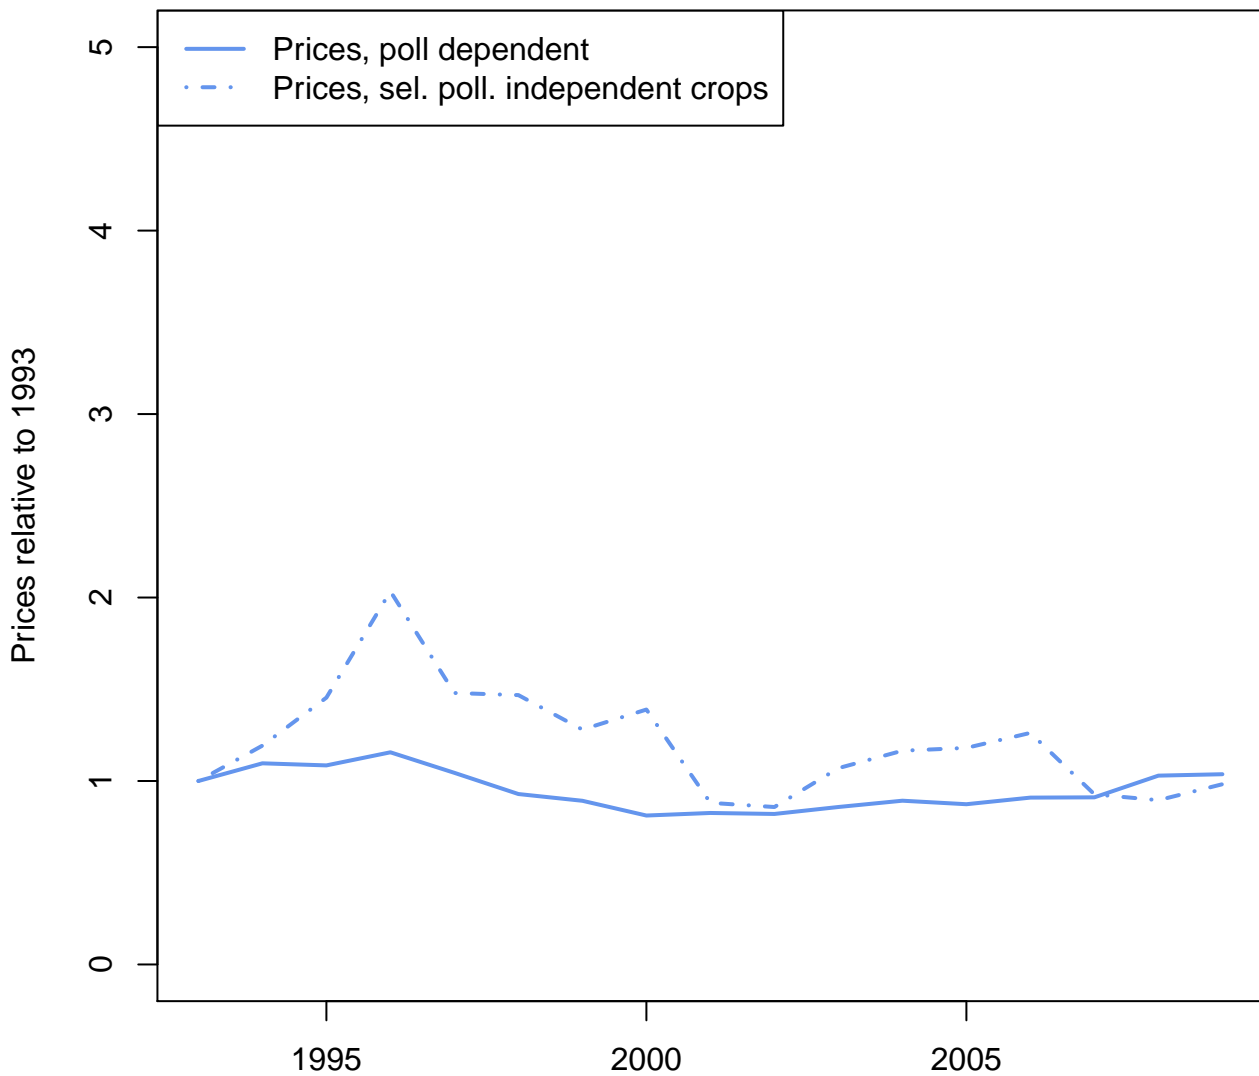

# Colombia

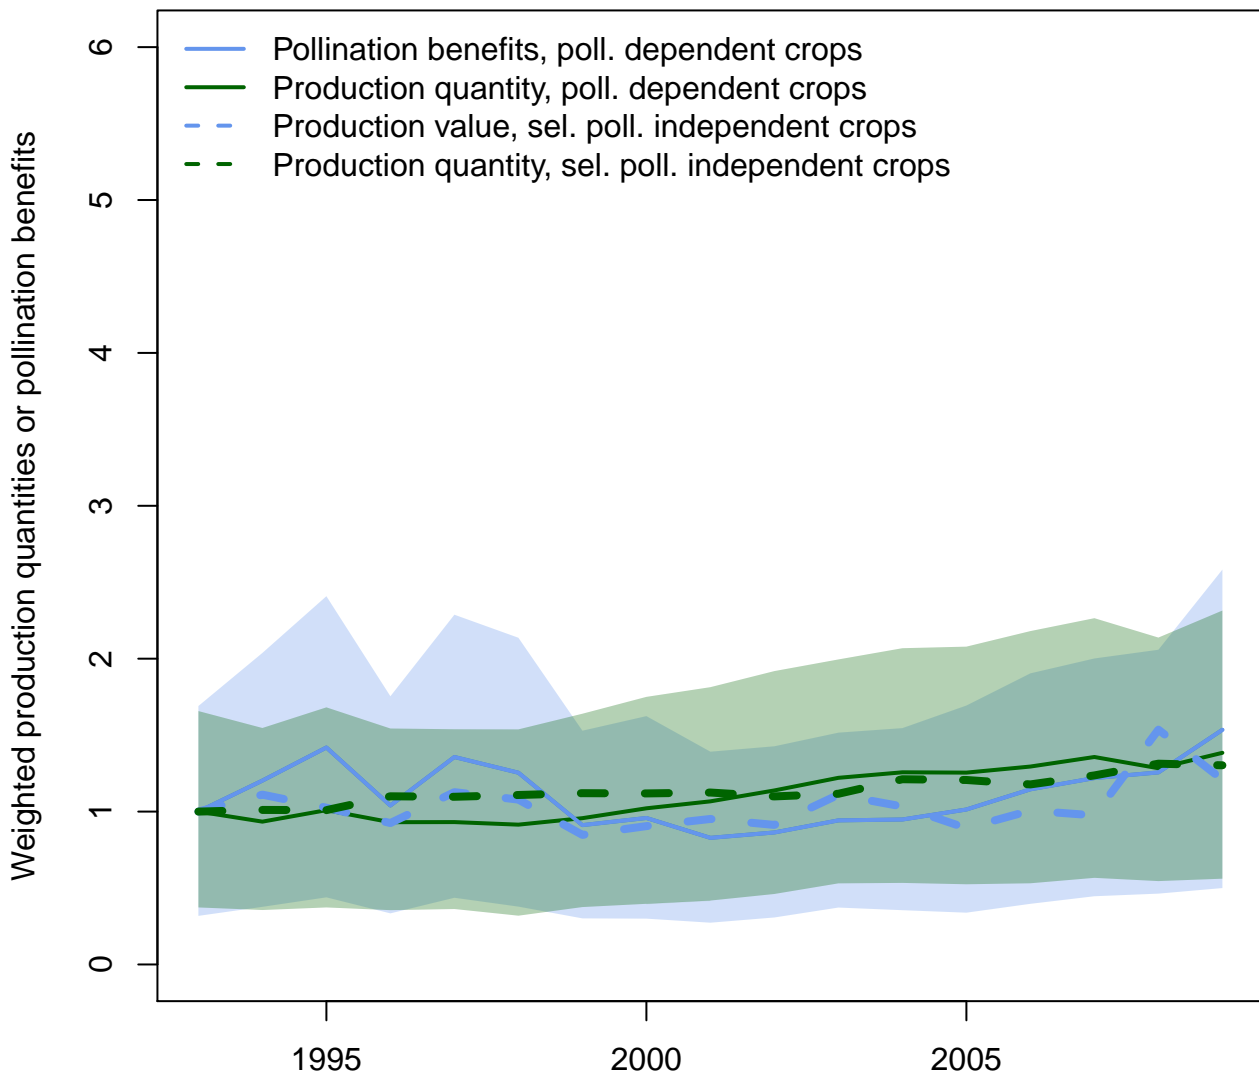

# Colombia

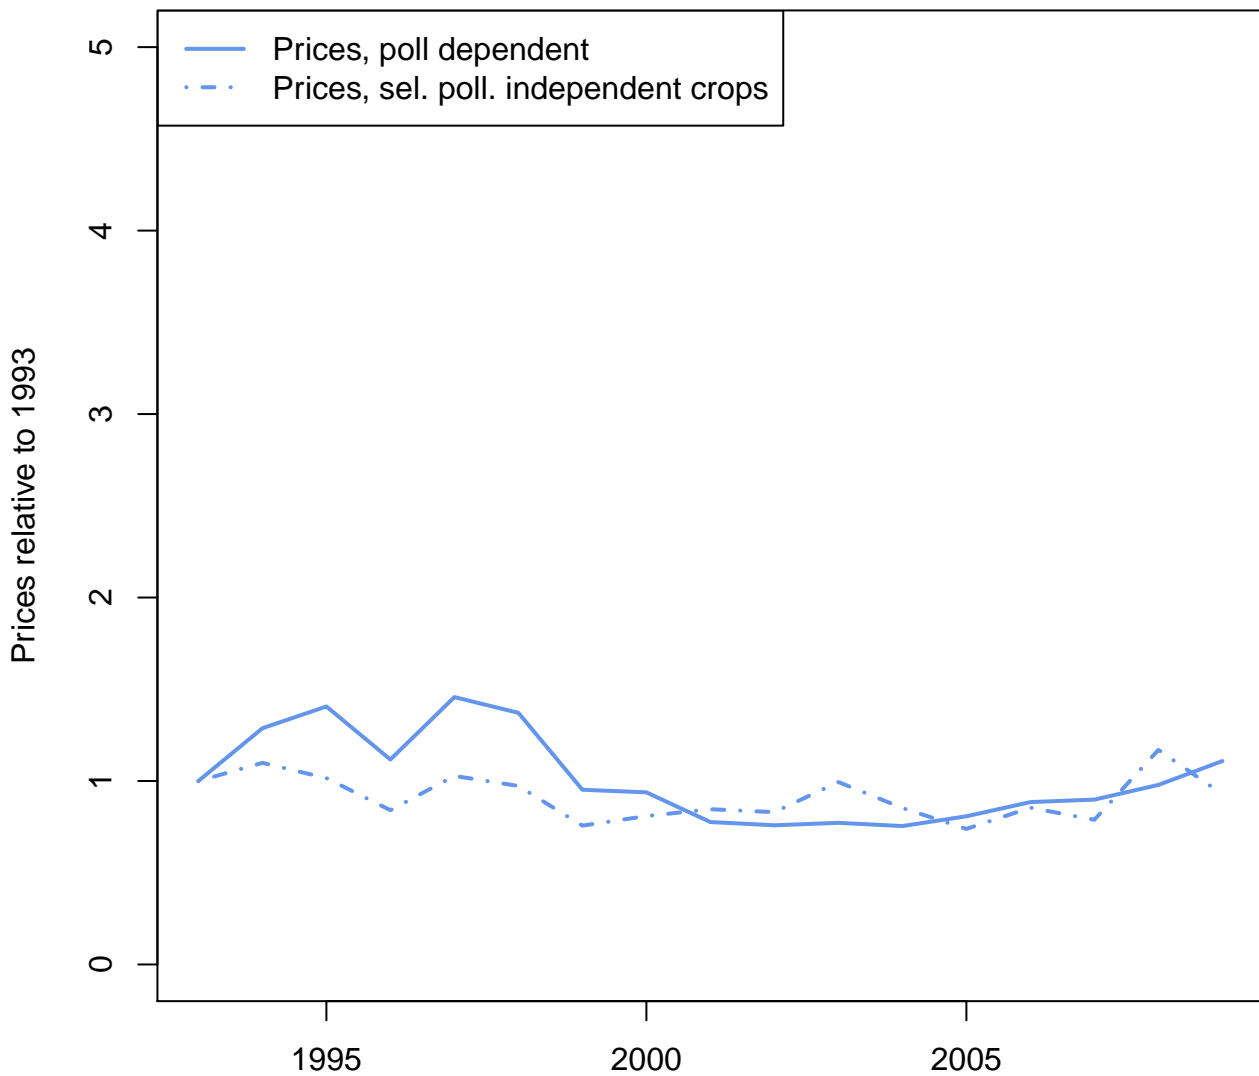

# Congo

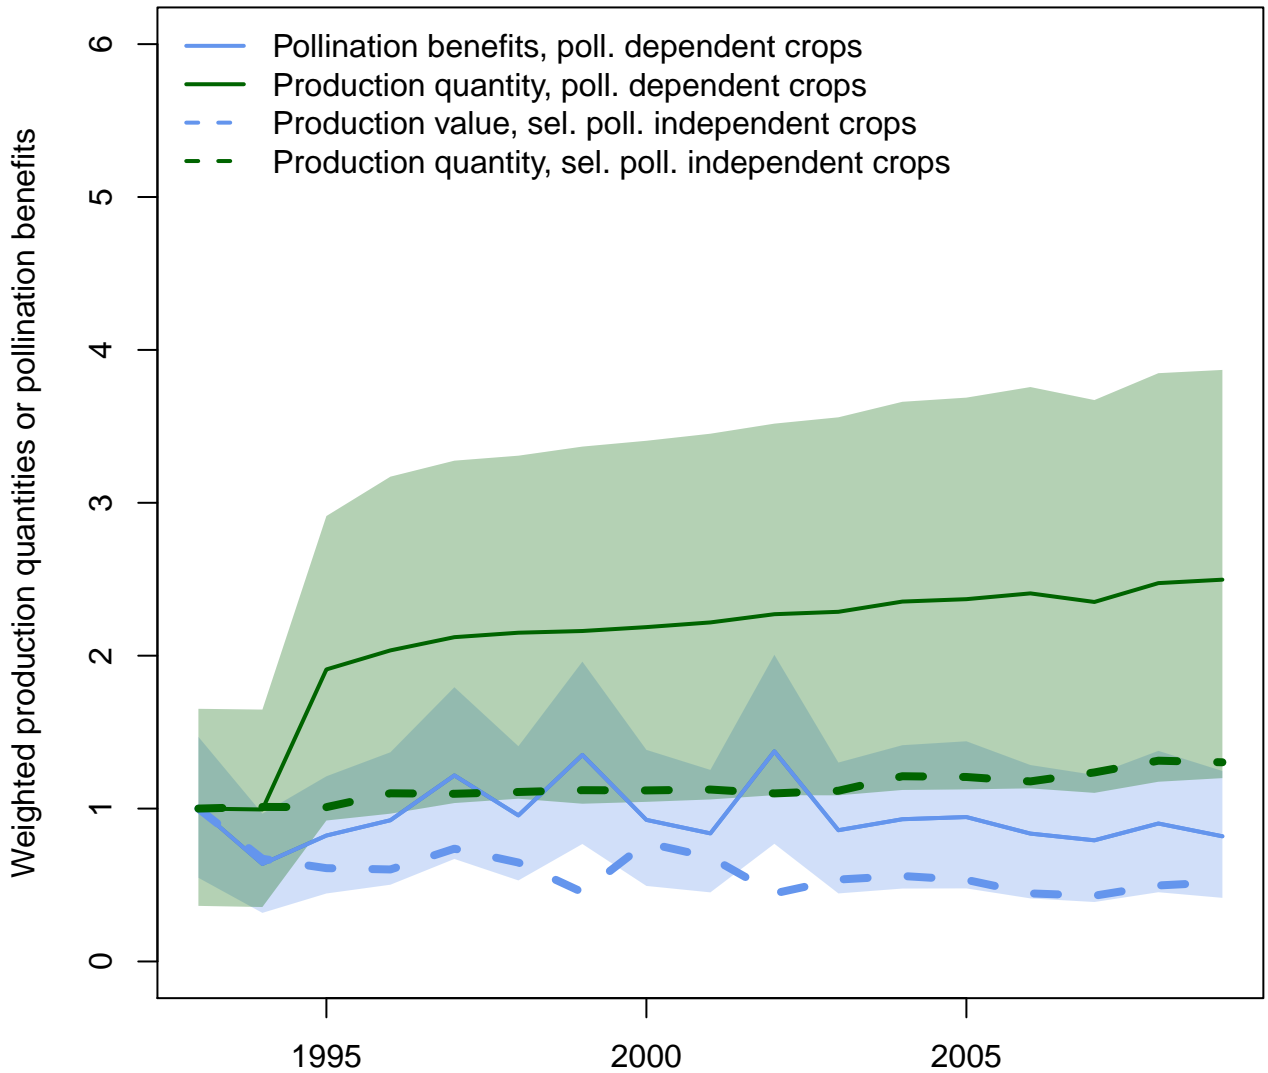



# Congo

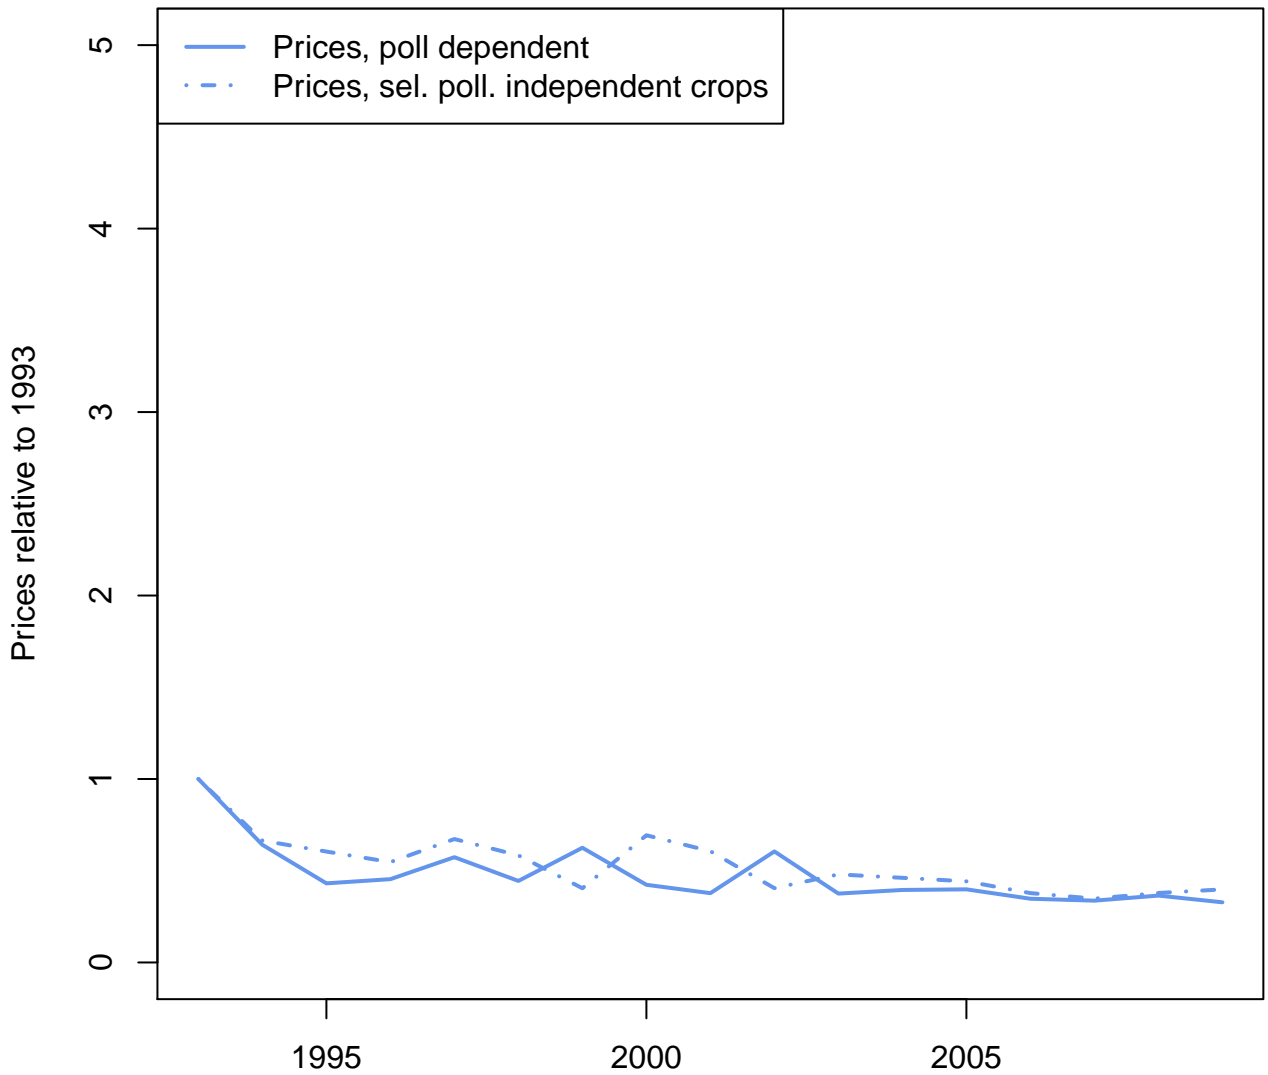

# Costa Rica

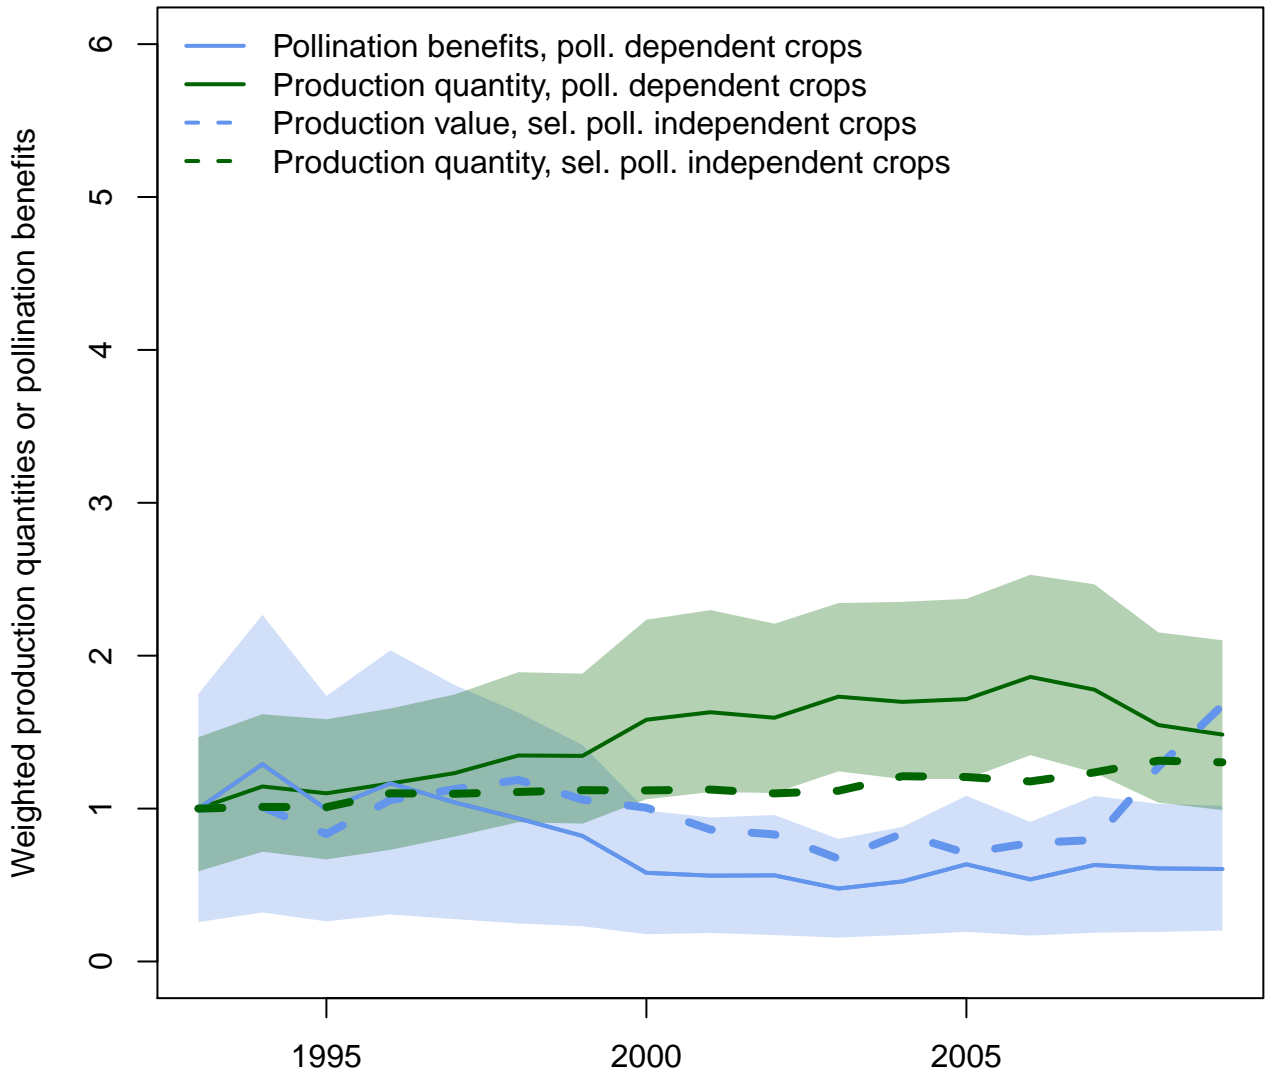

# Costa Rica

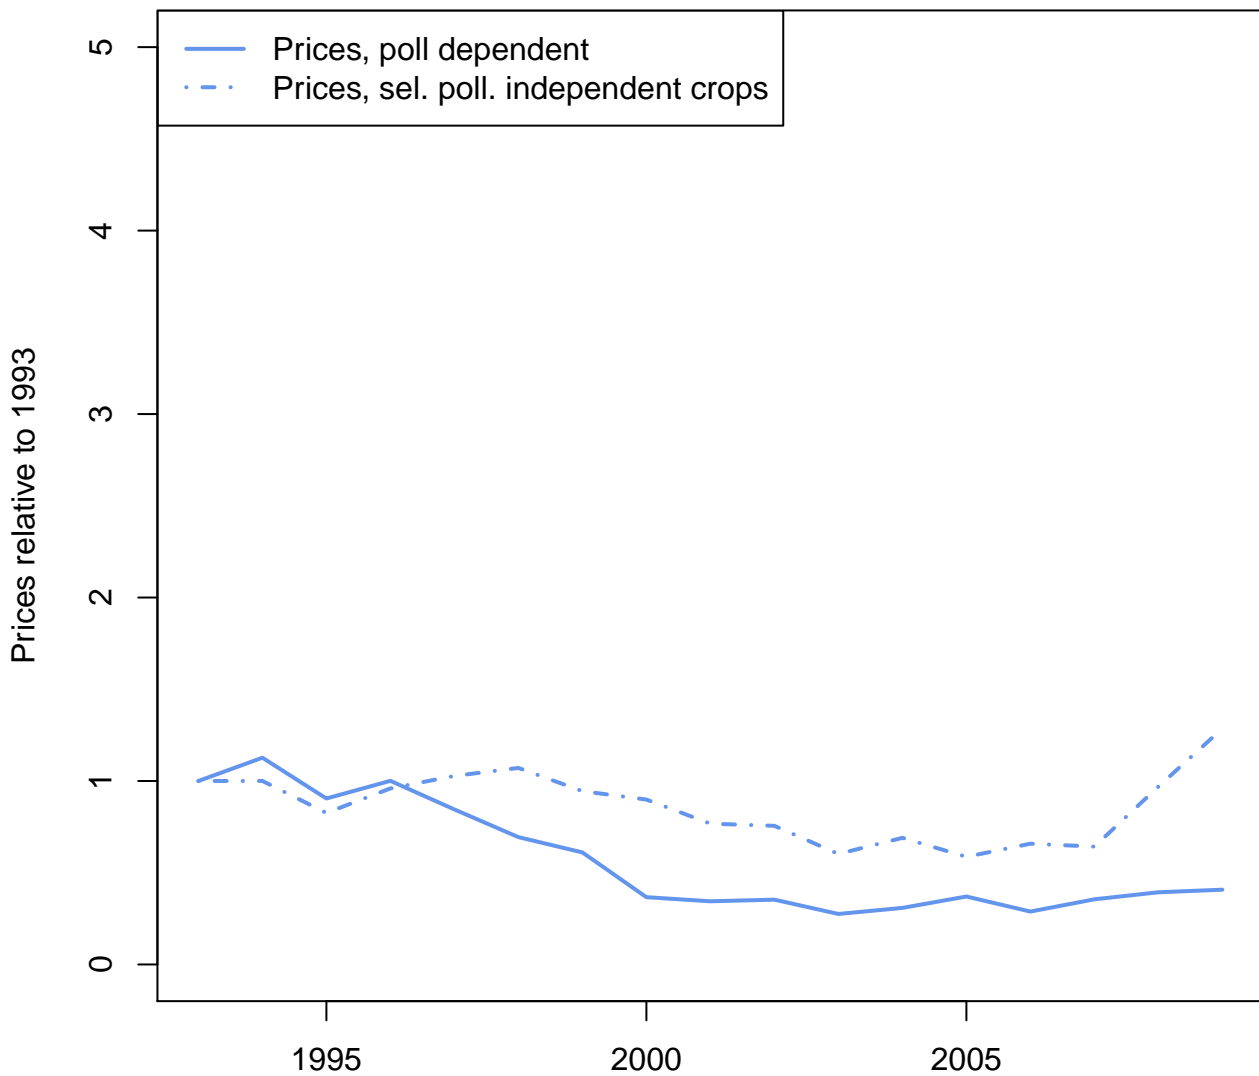

# Côte d'Ivoire

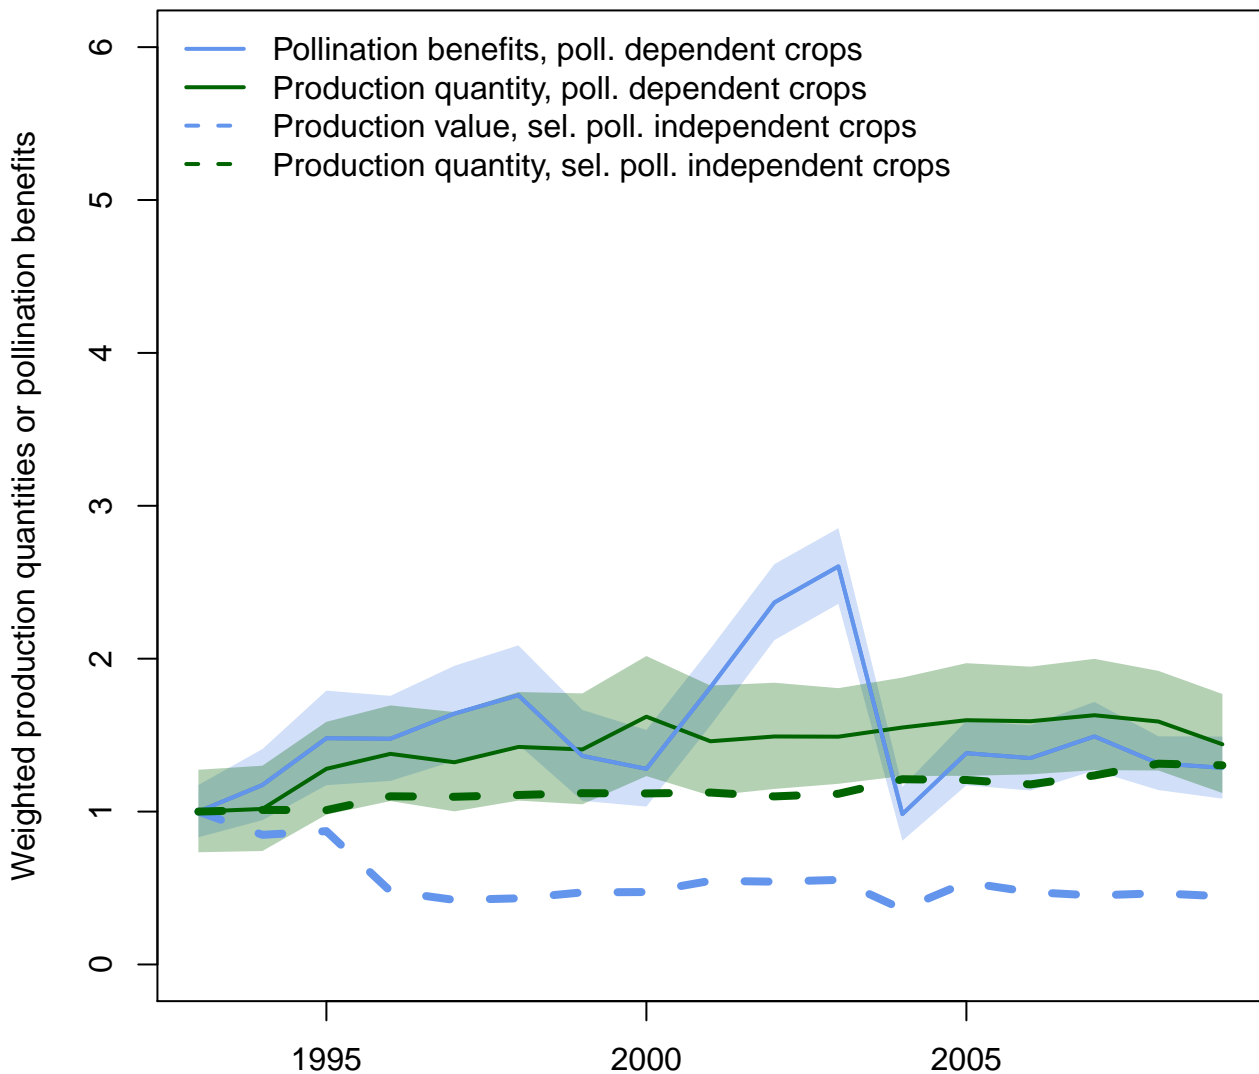

# Côte d'Ivoire

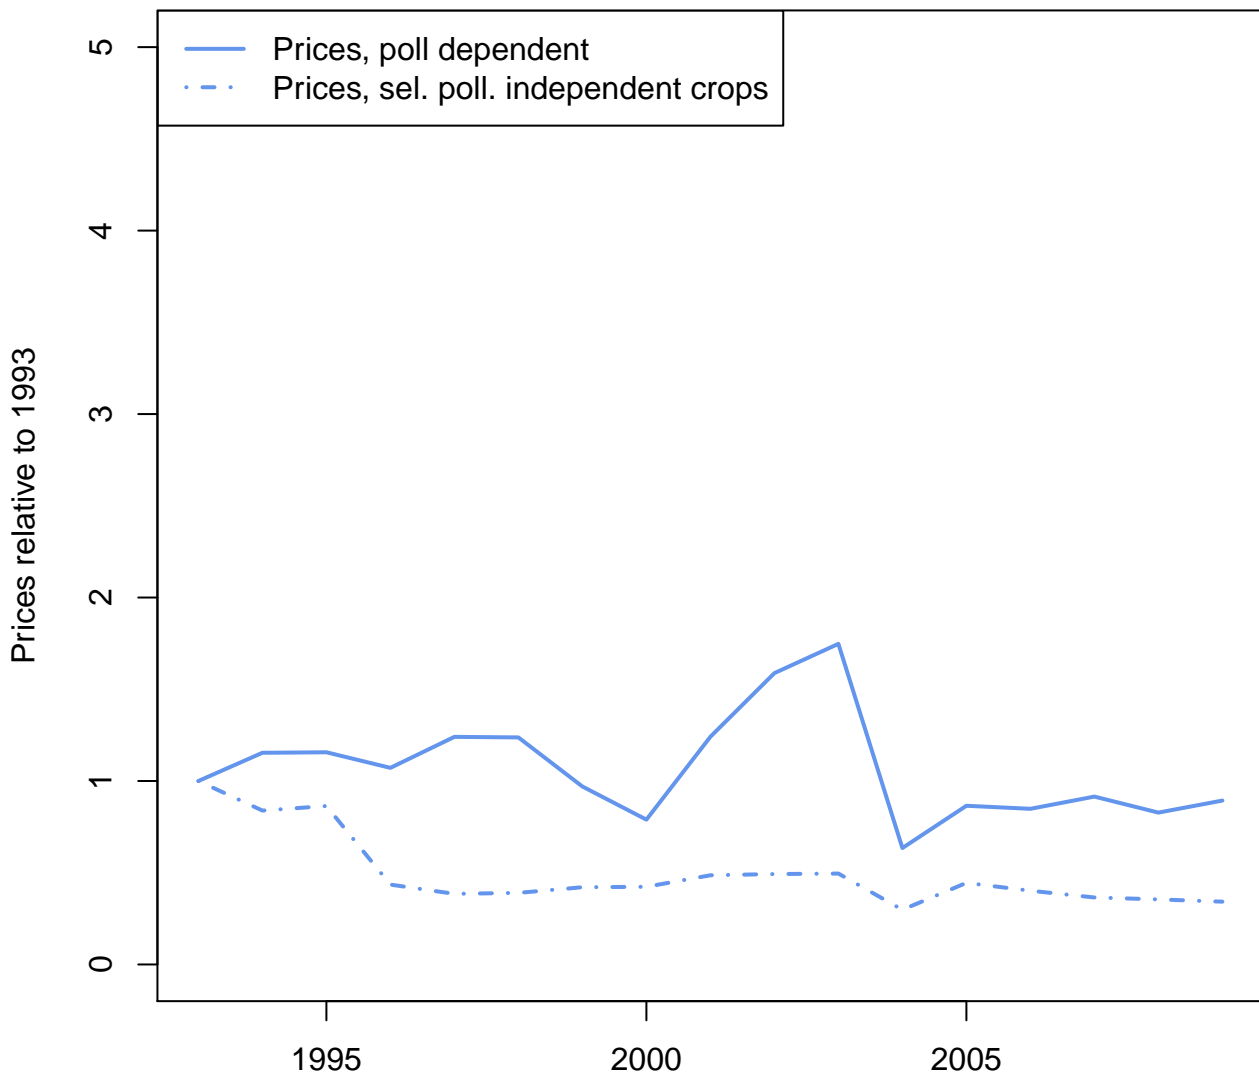

# Croatia

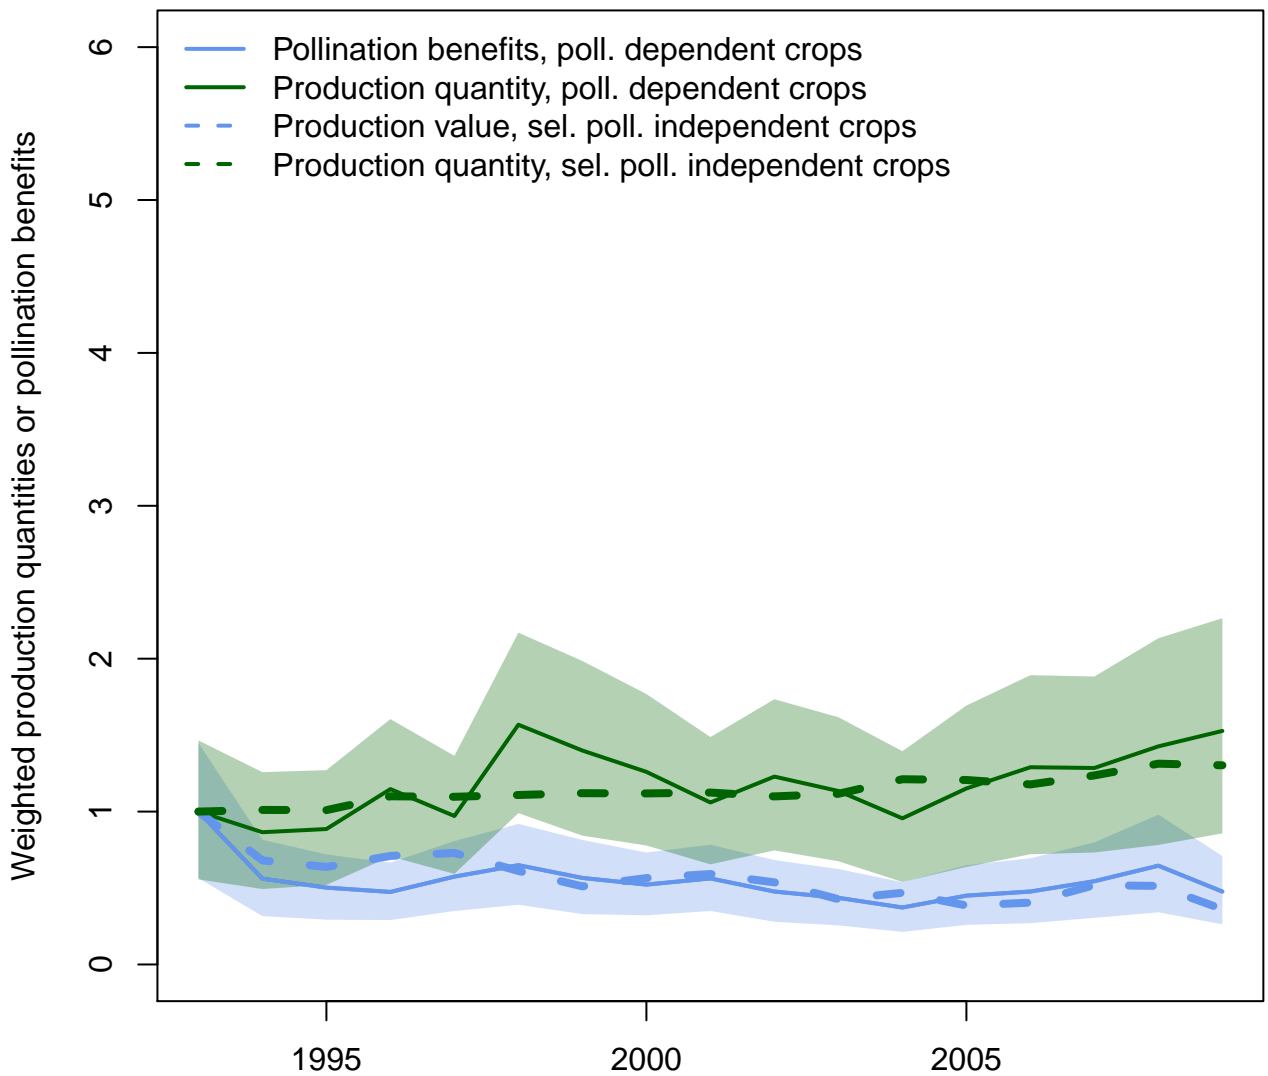

# Croatia

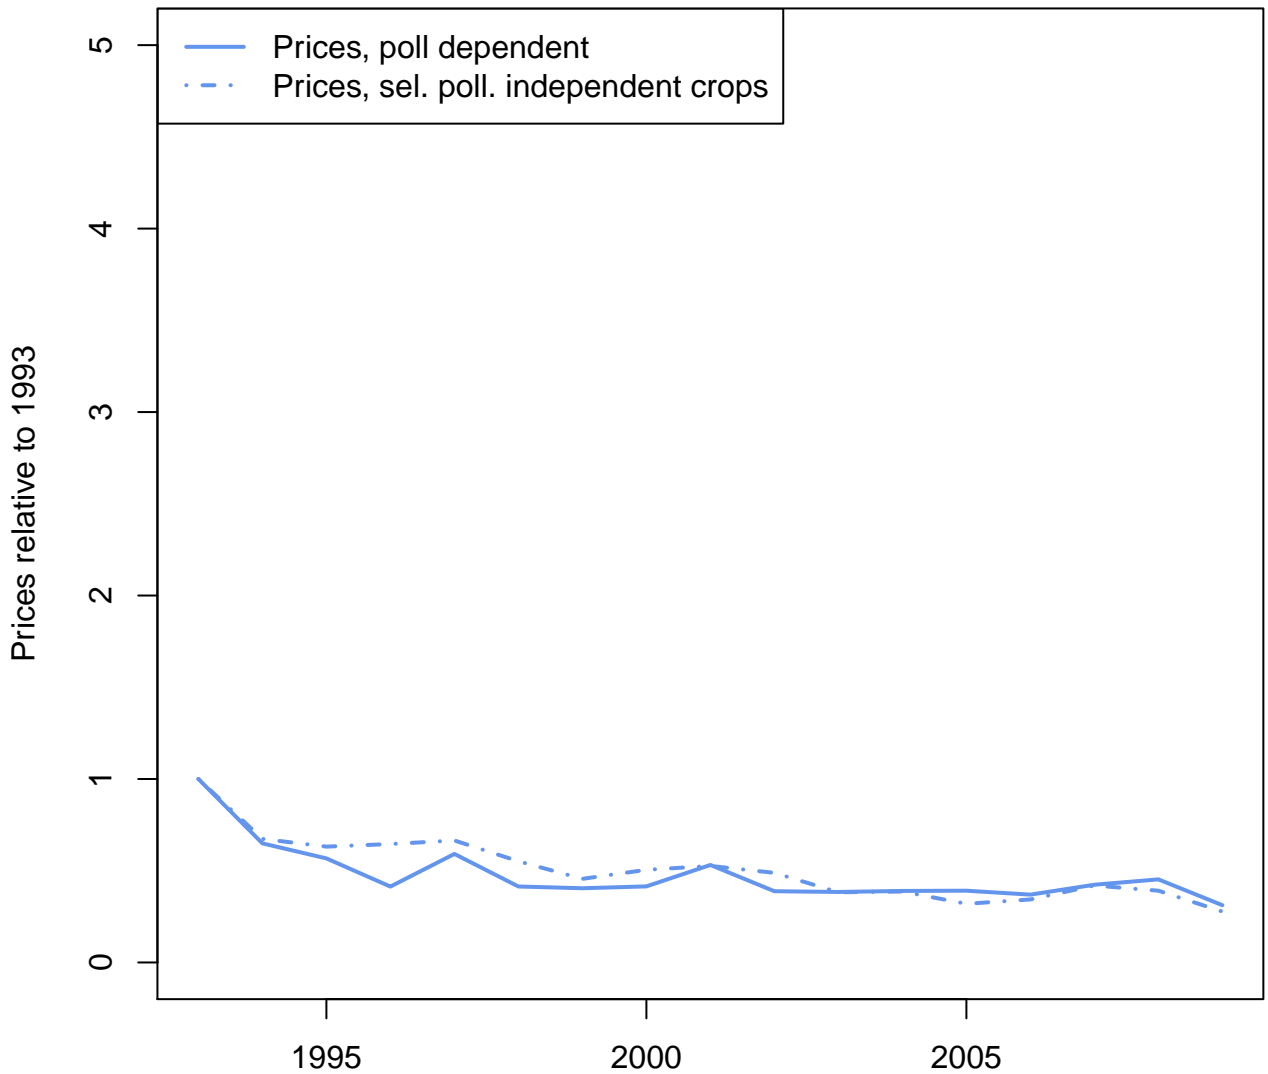

# Cyprus

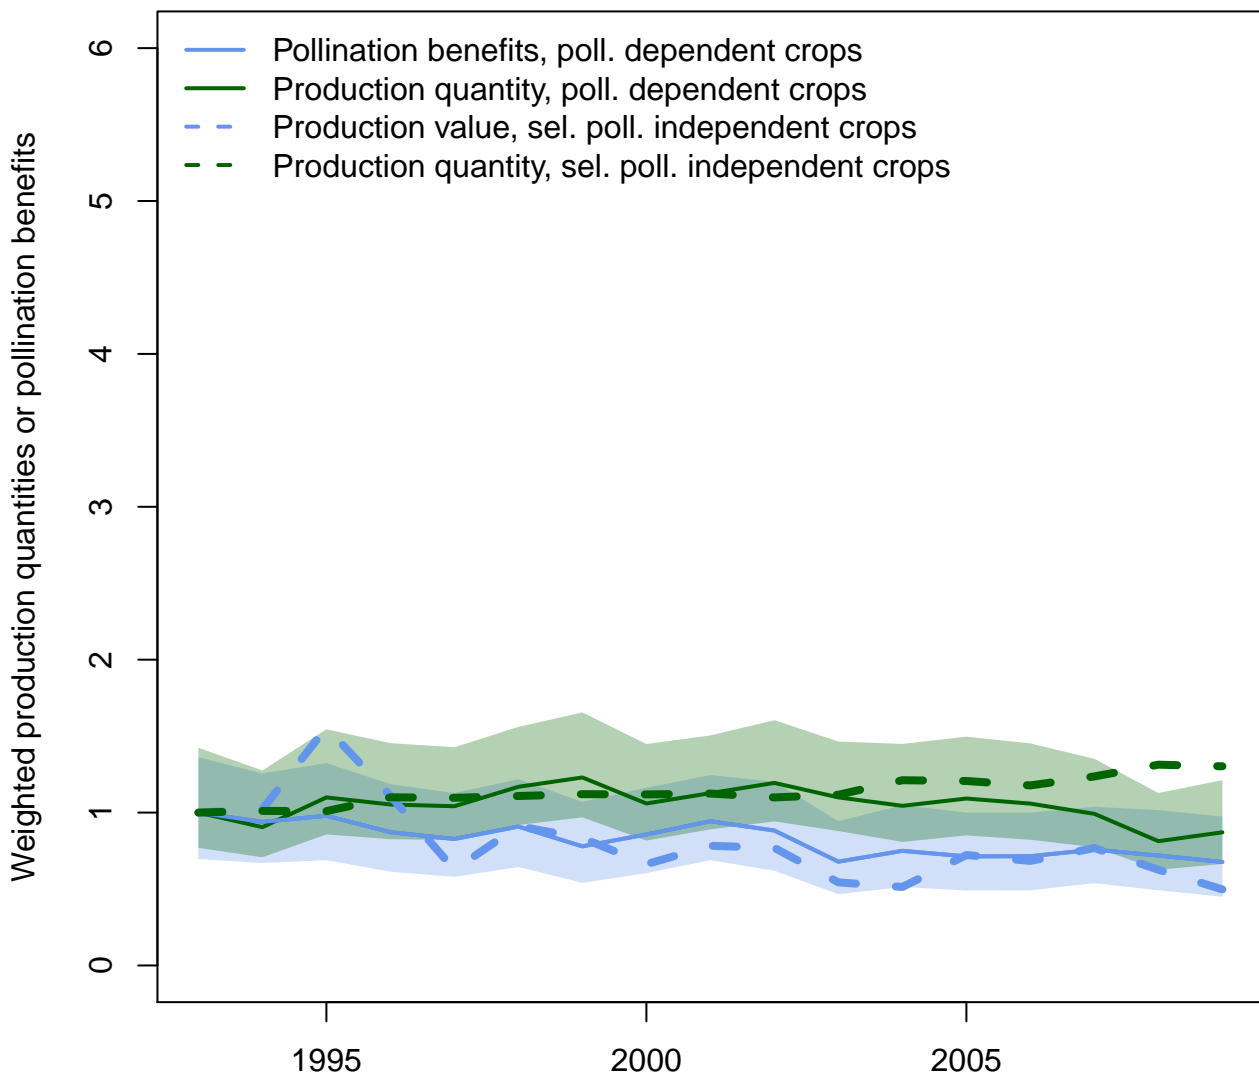



# Cyprus

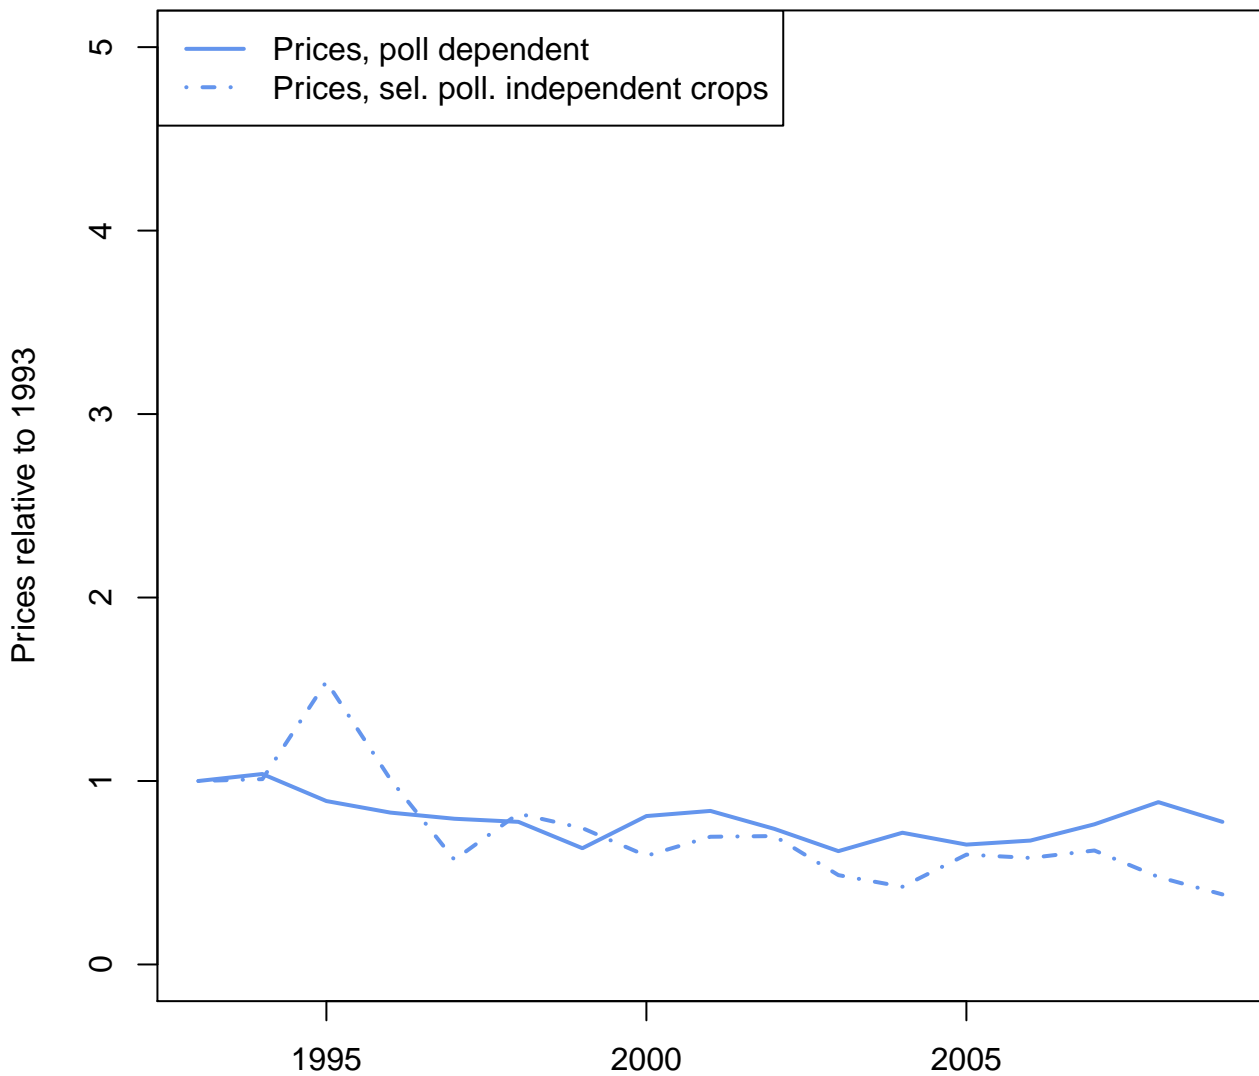

# Czech Republic

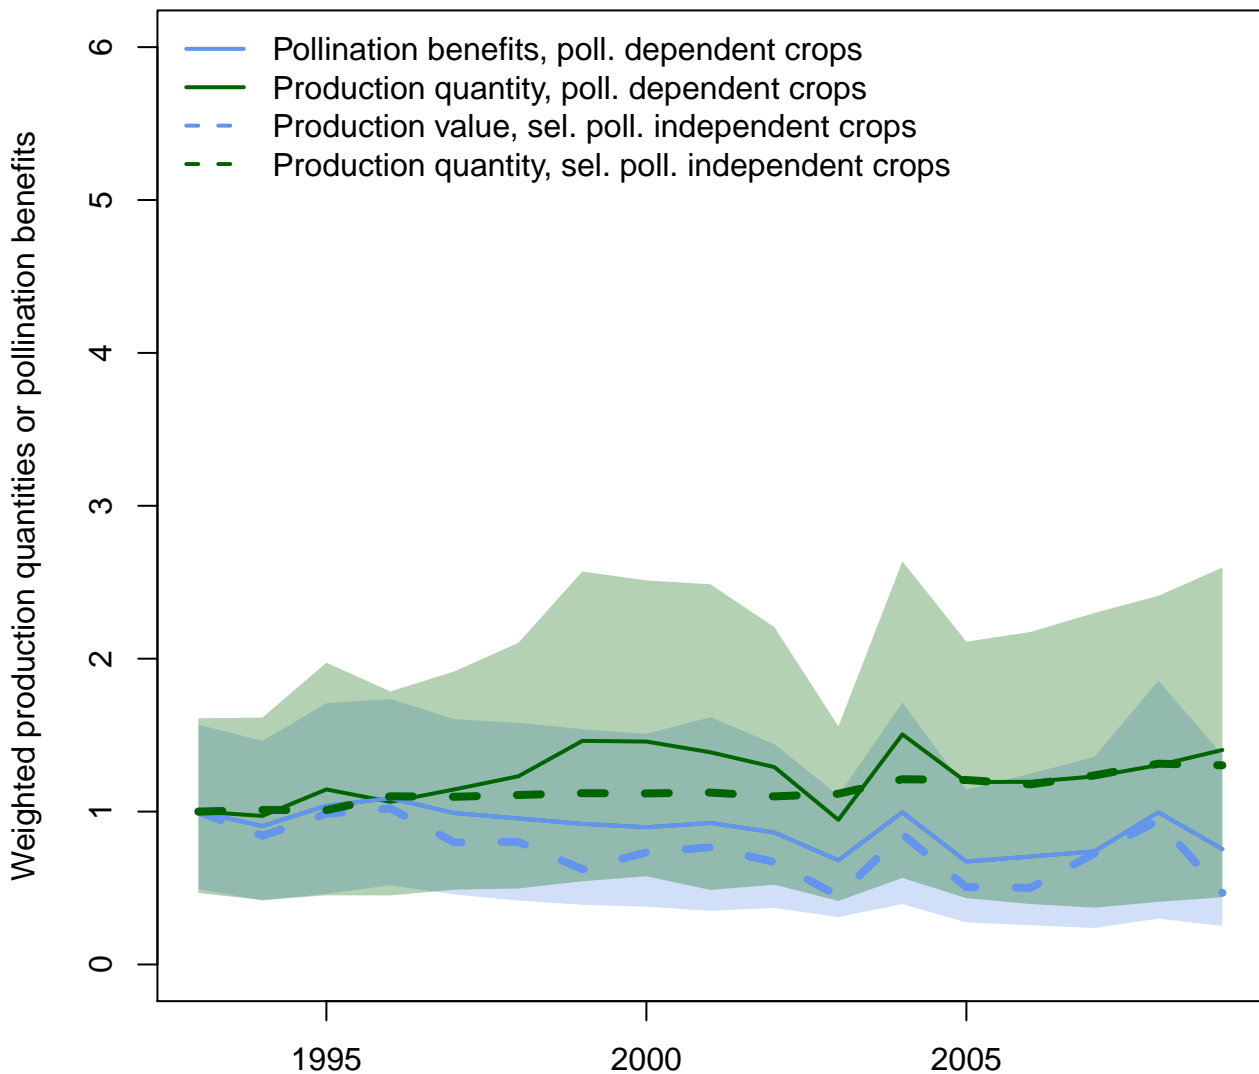

# Czech Republic

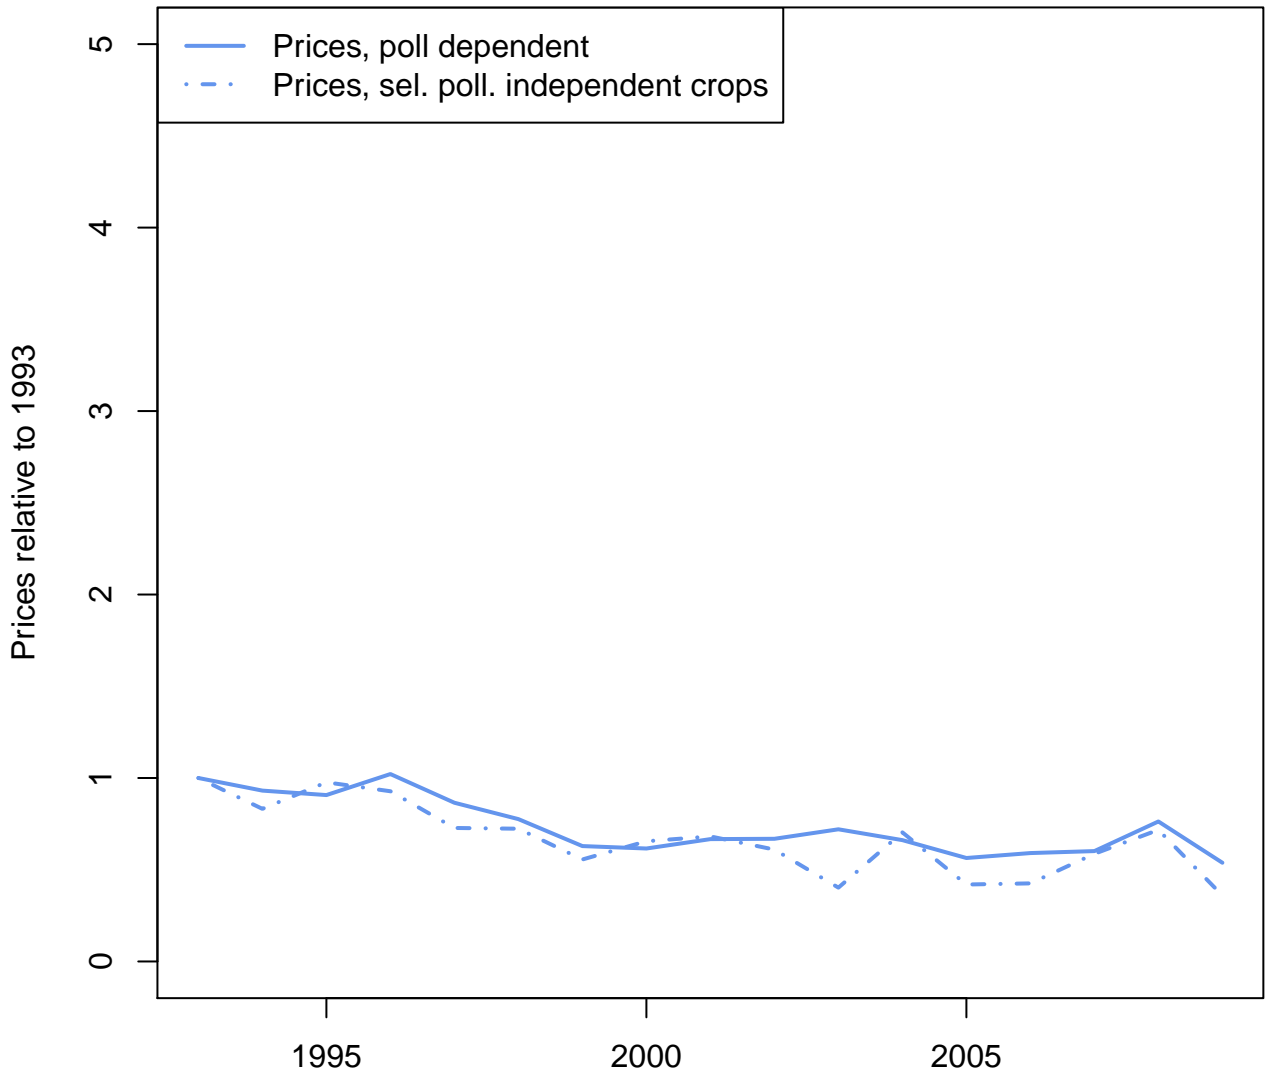

# Denmark

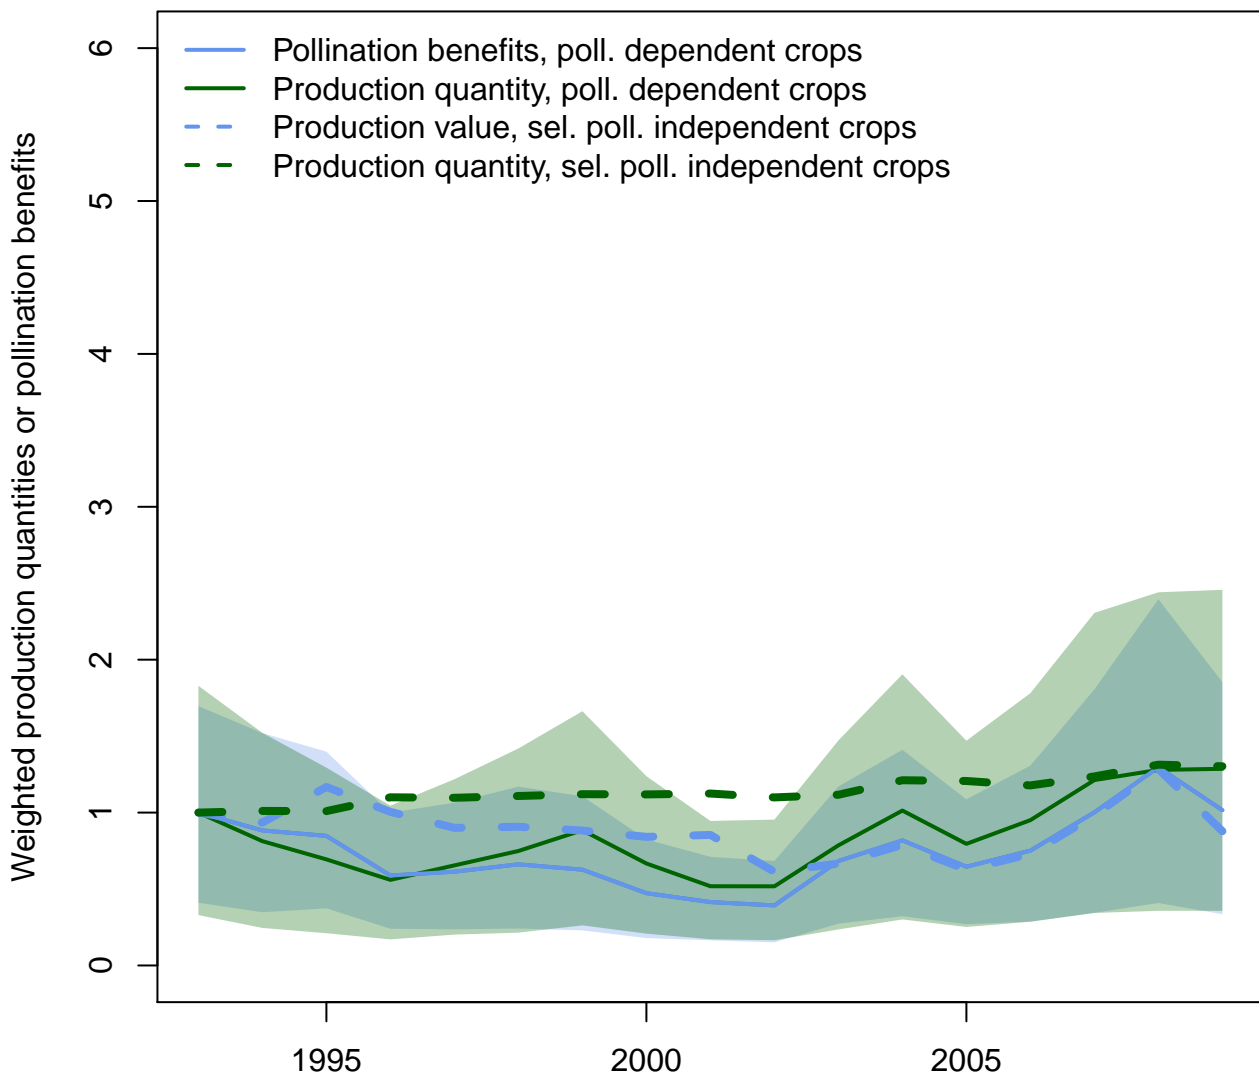

# Denmark

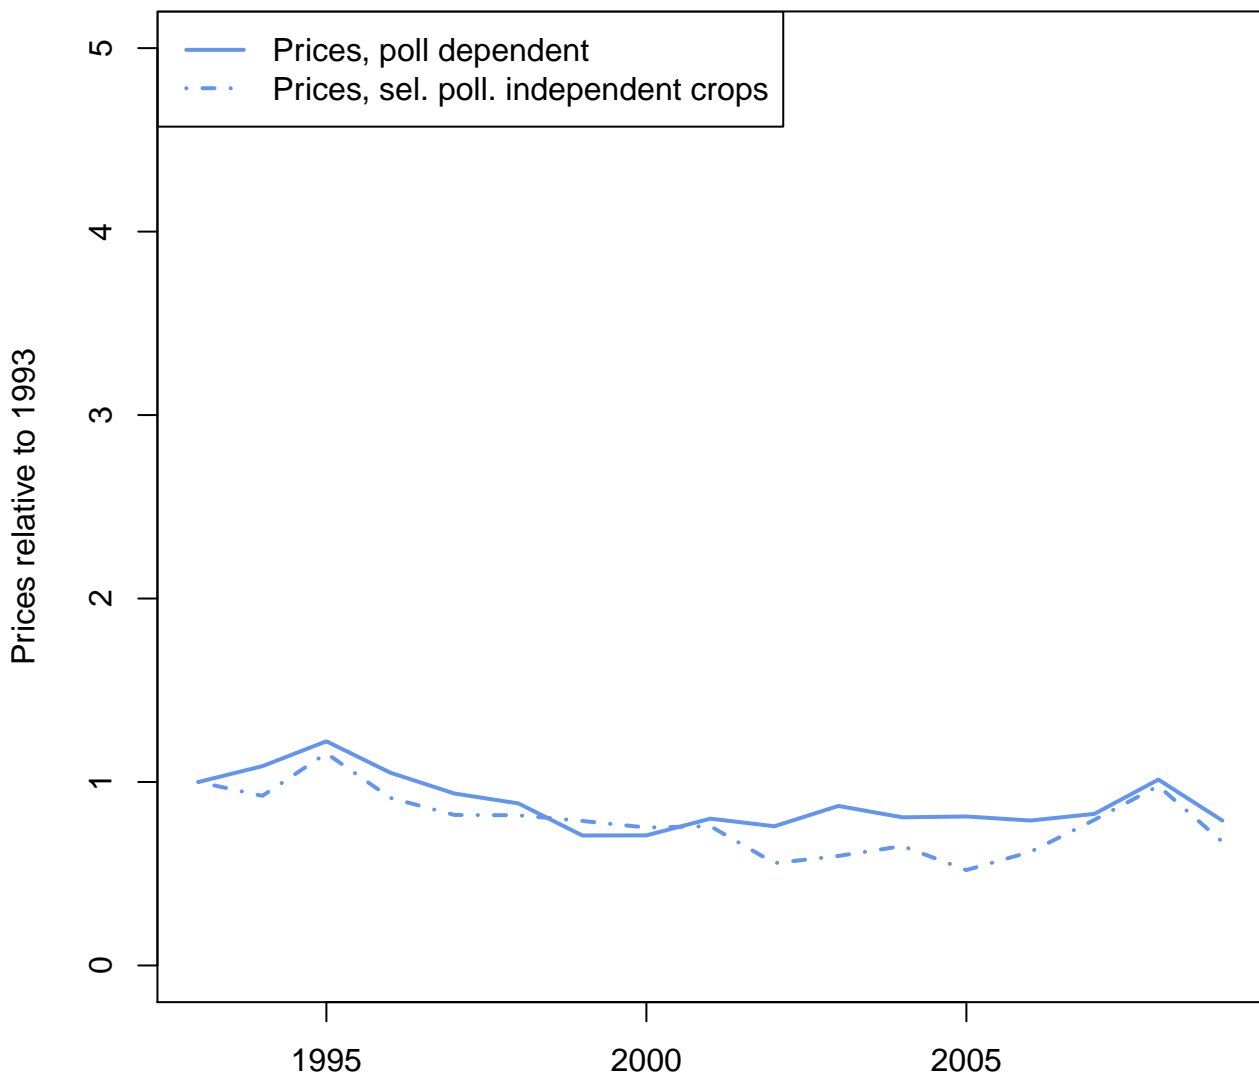

## Dominican Republic

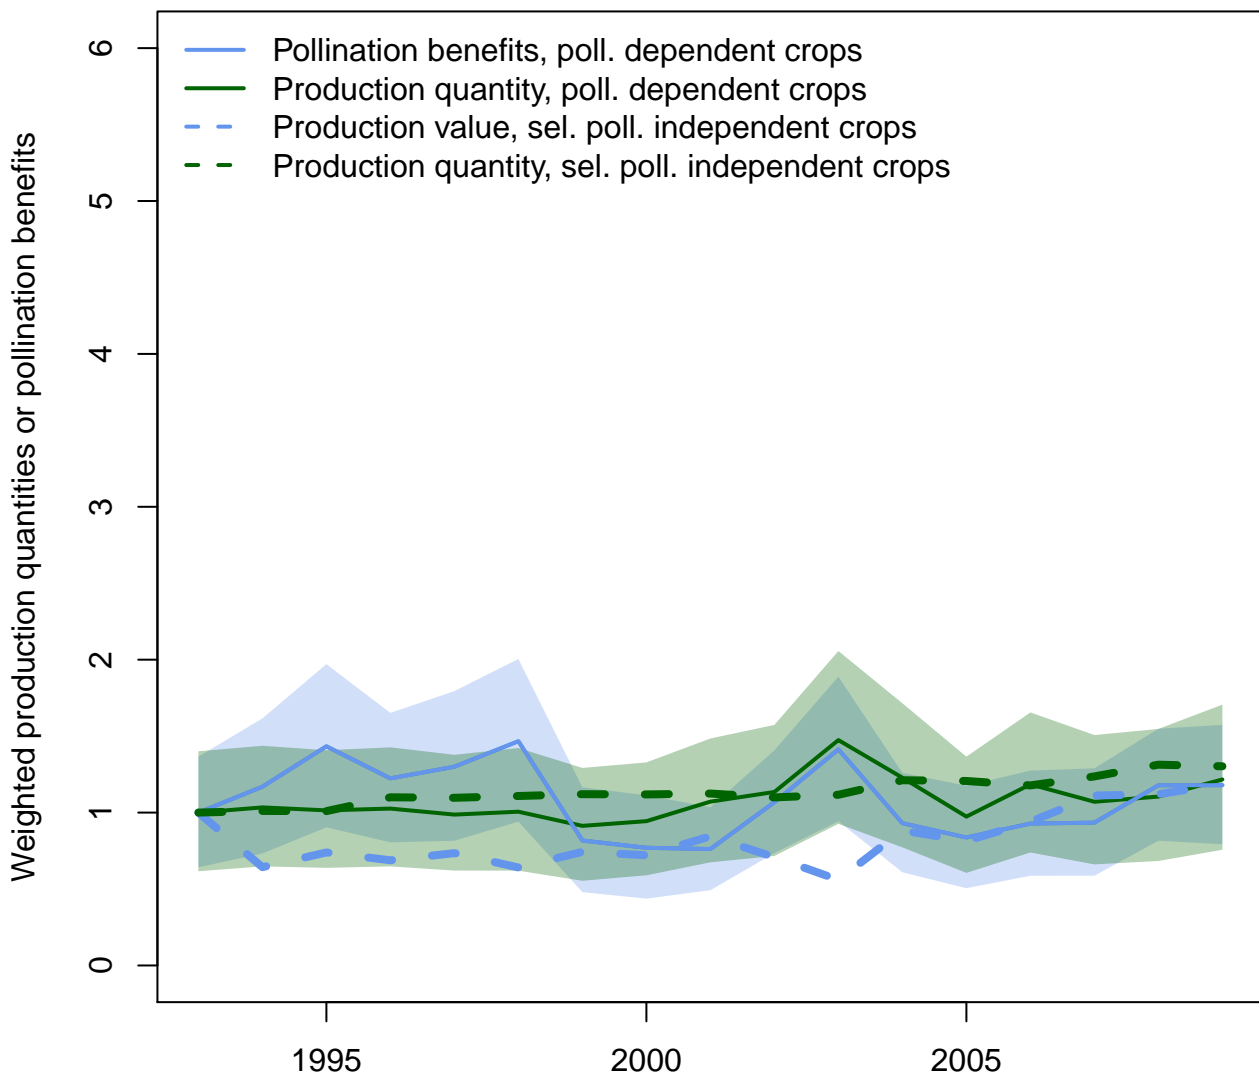

# Dominican Republic

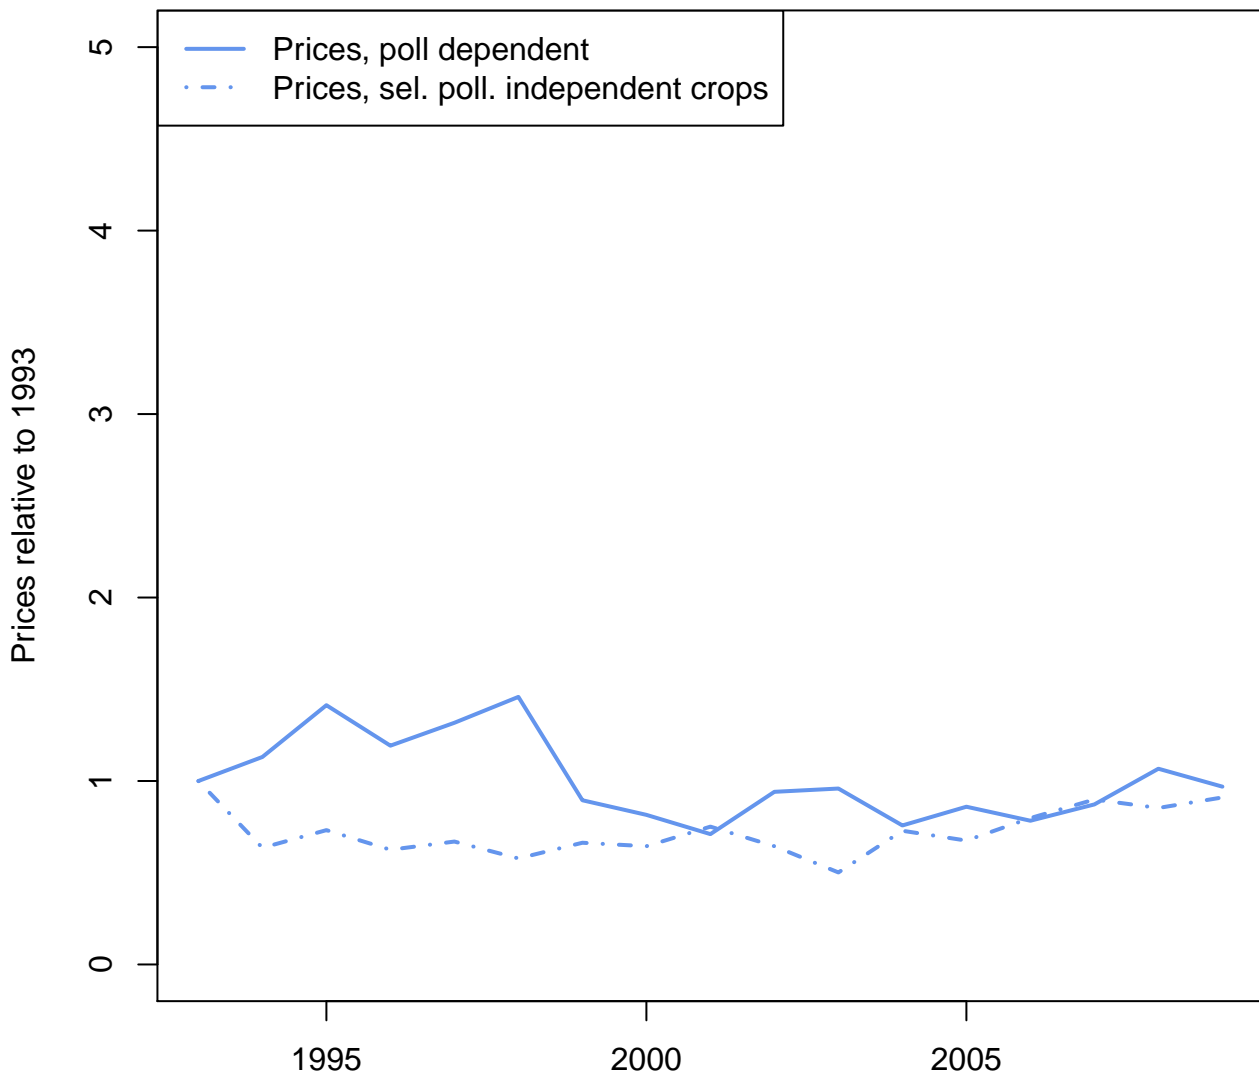

## Ecuador

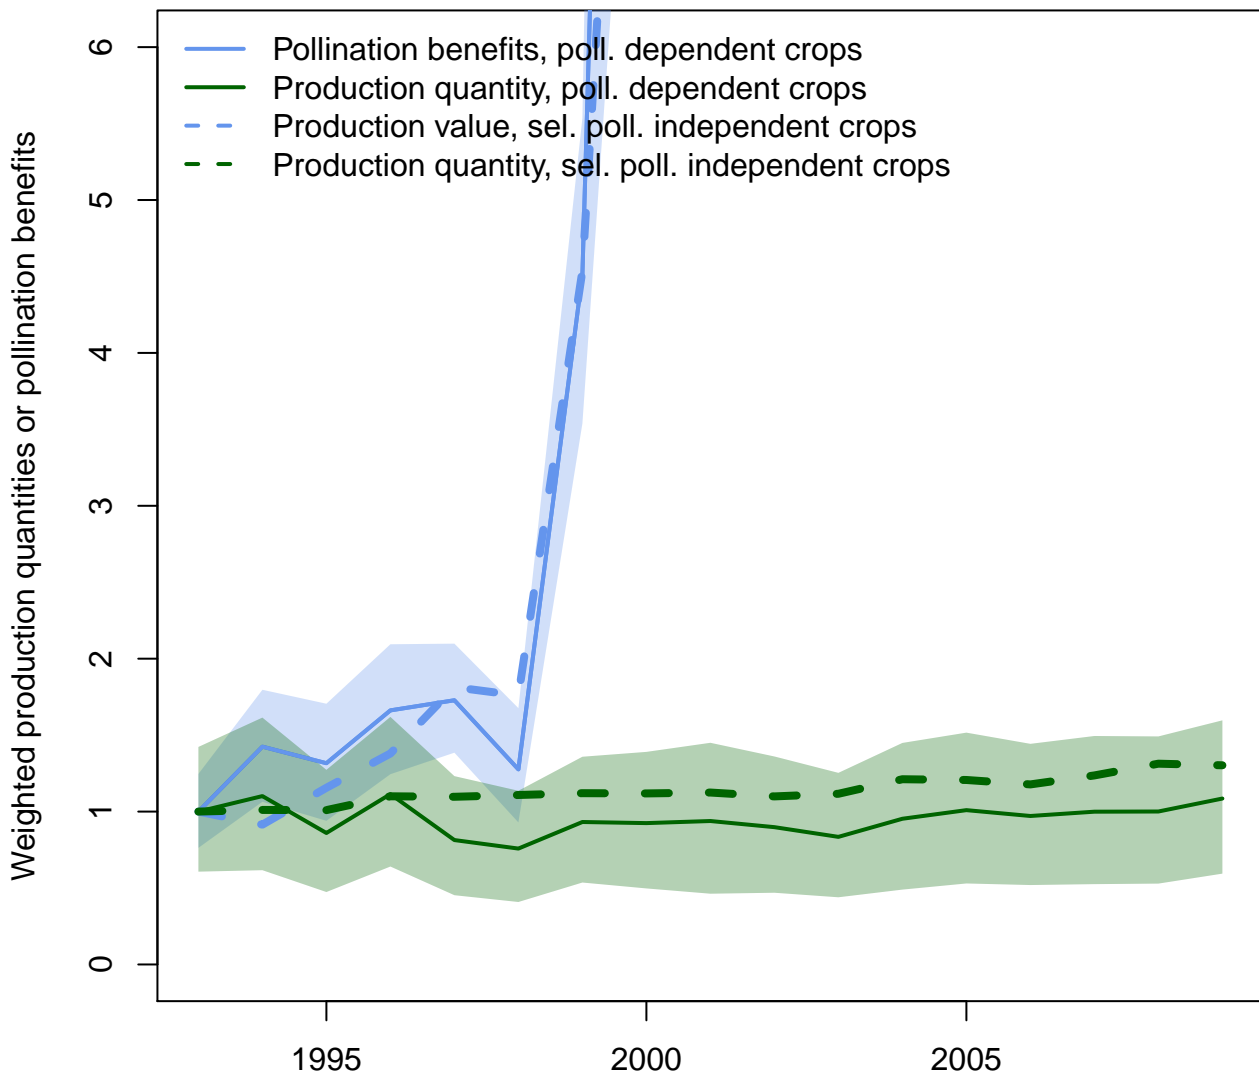



## Ecuador

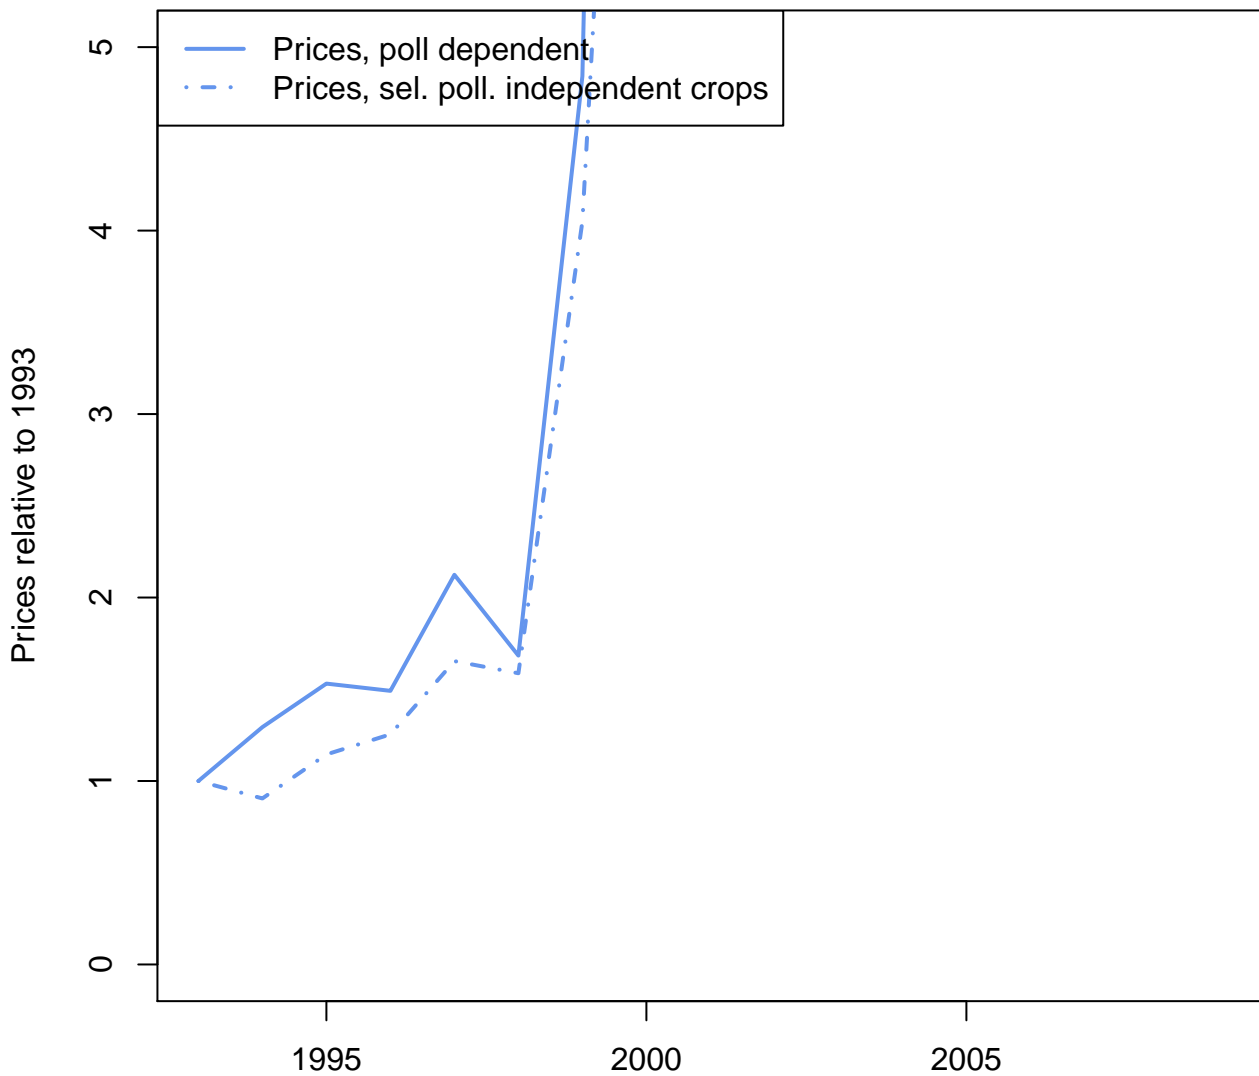

# Egypt

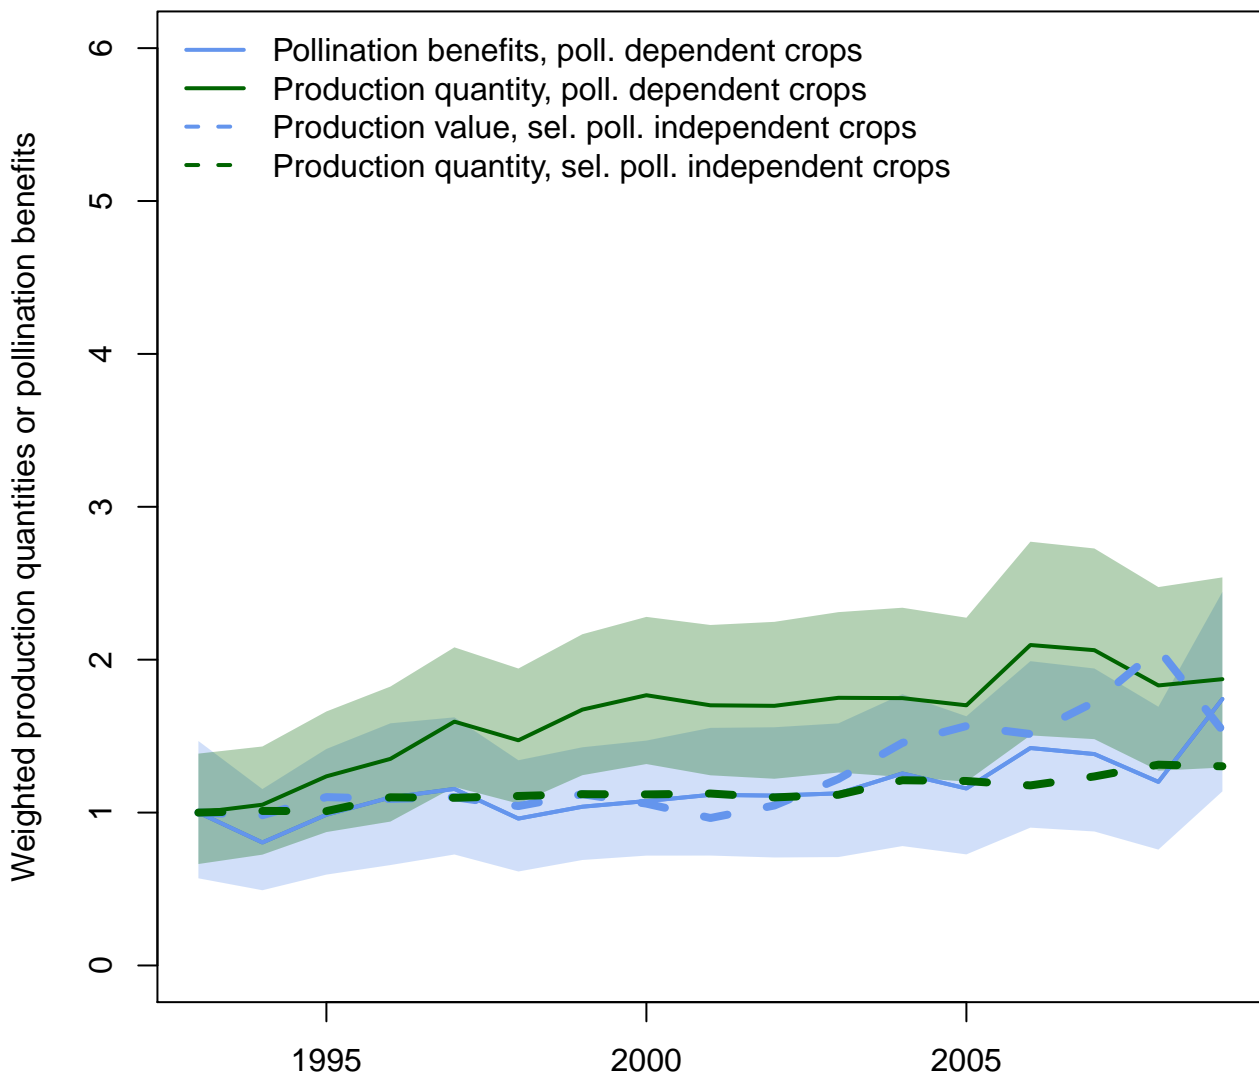

# Egypt

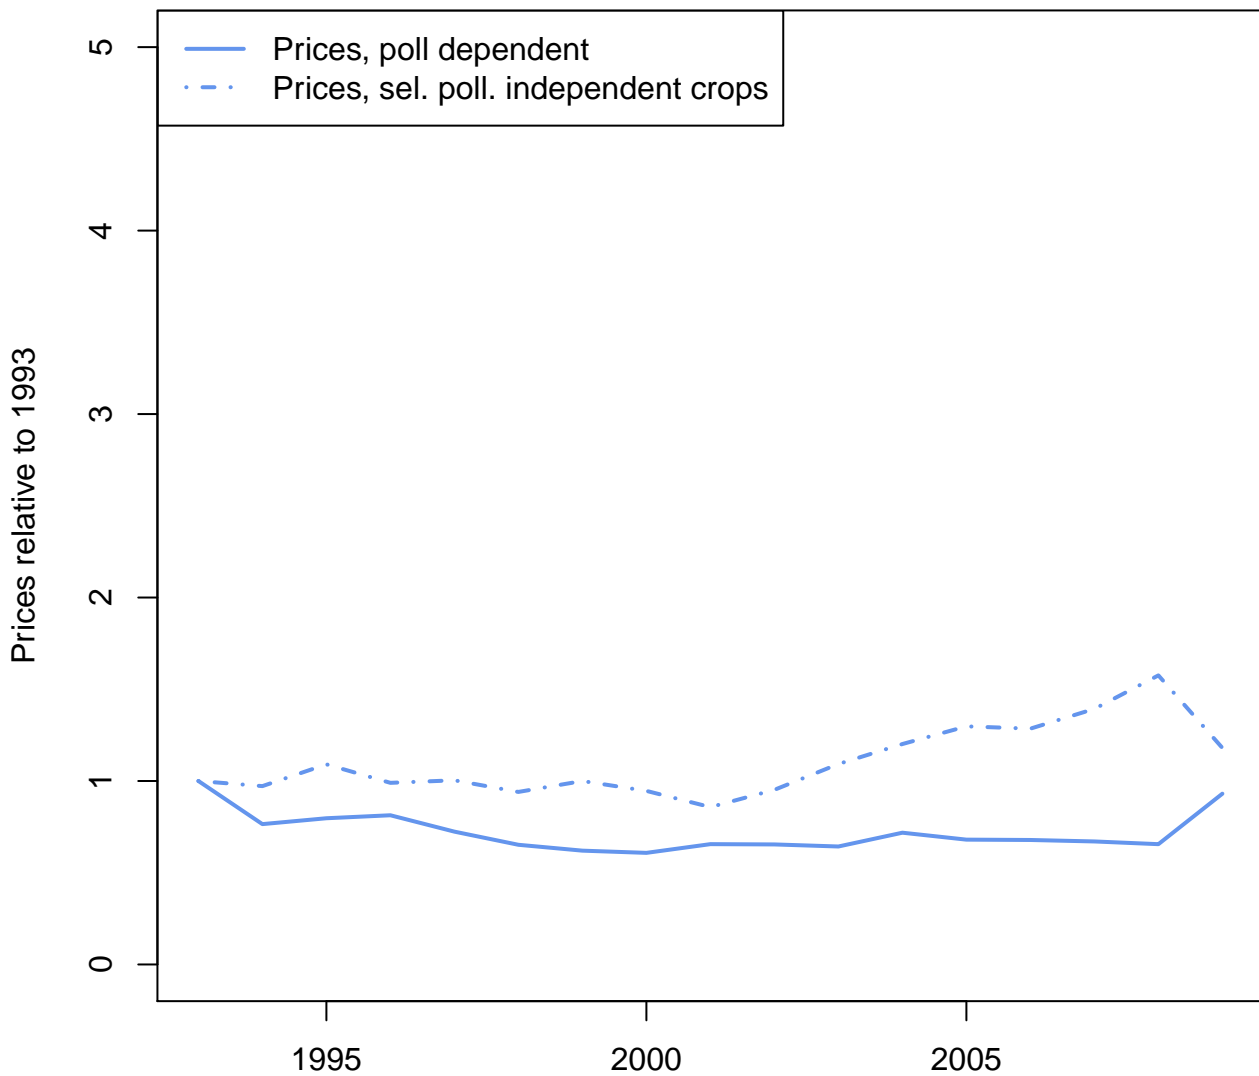

# El Salvador

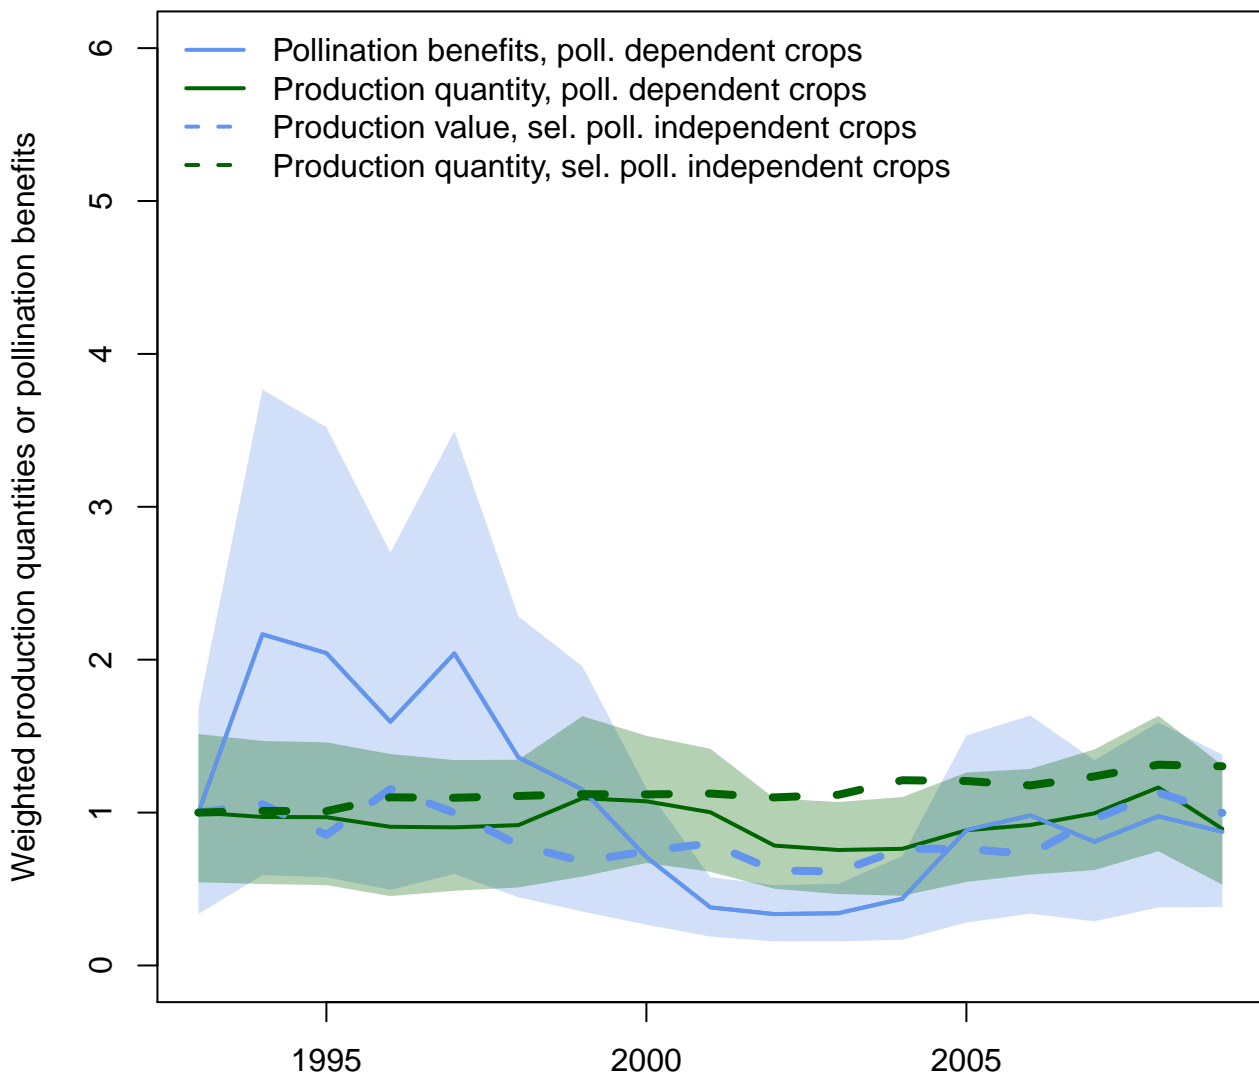

# El Salvador

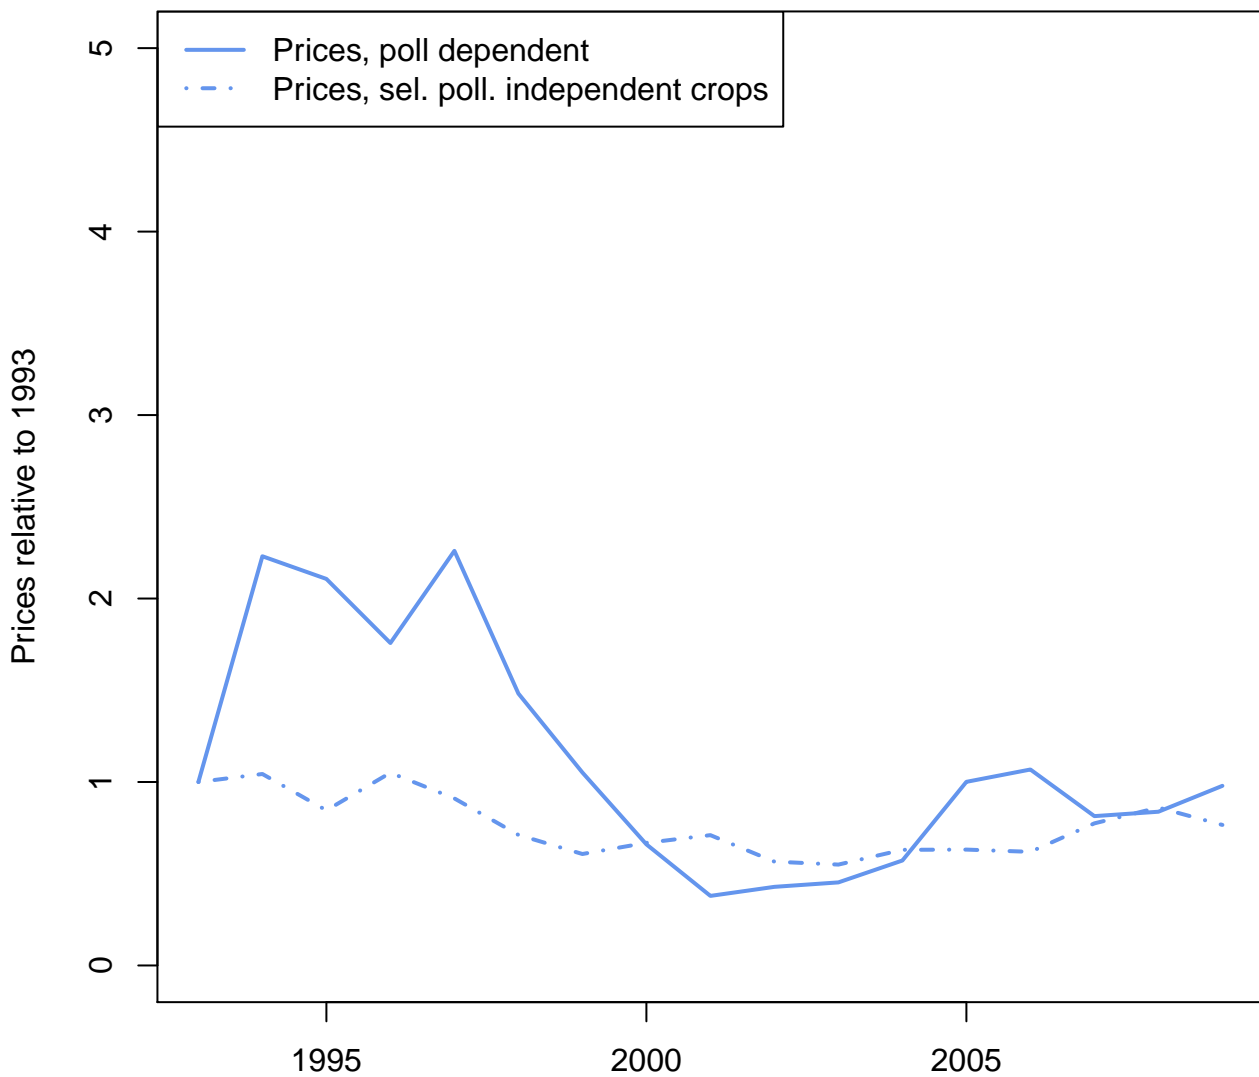

# Equatorial Guinea

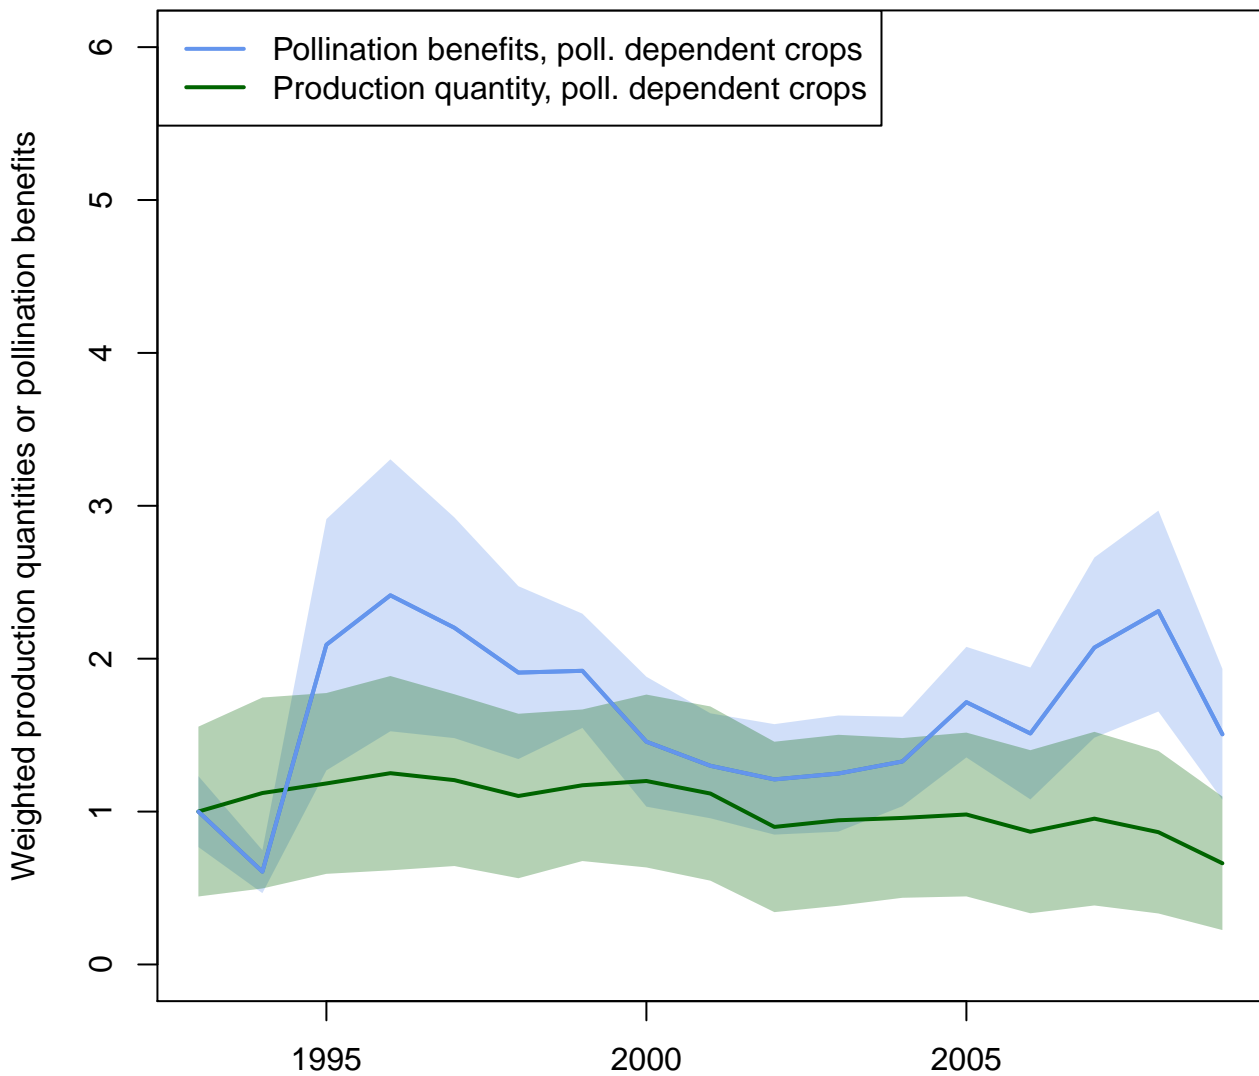

# Eritrea

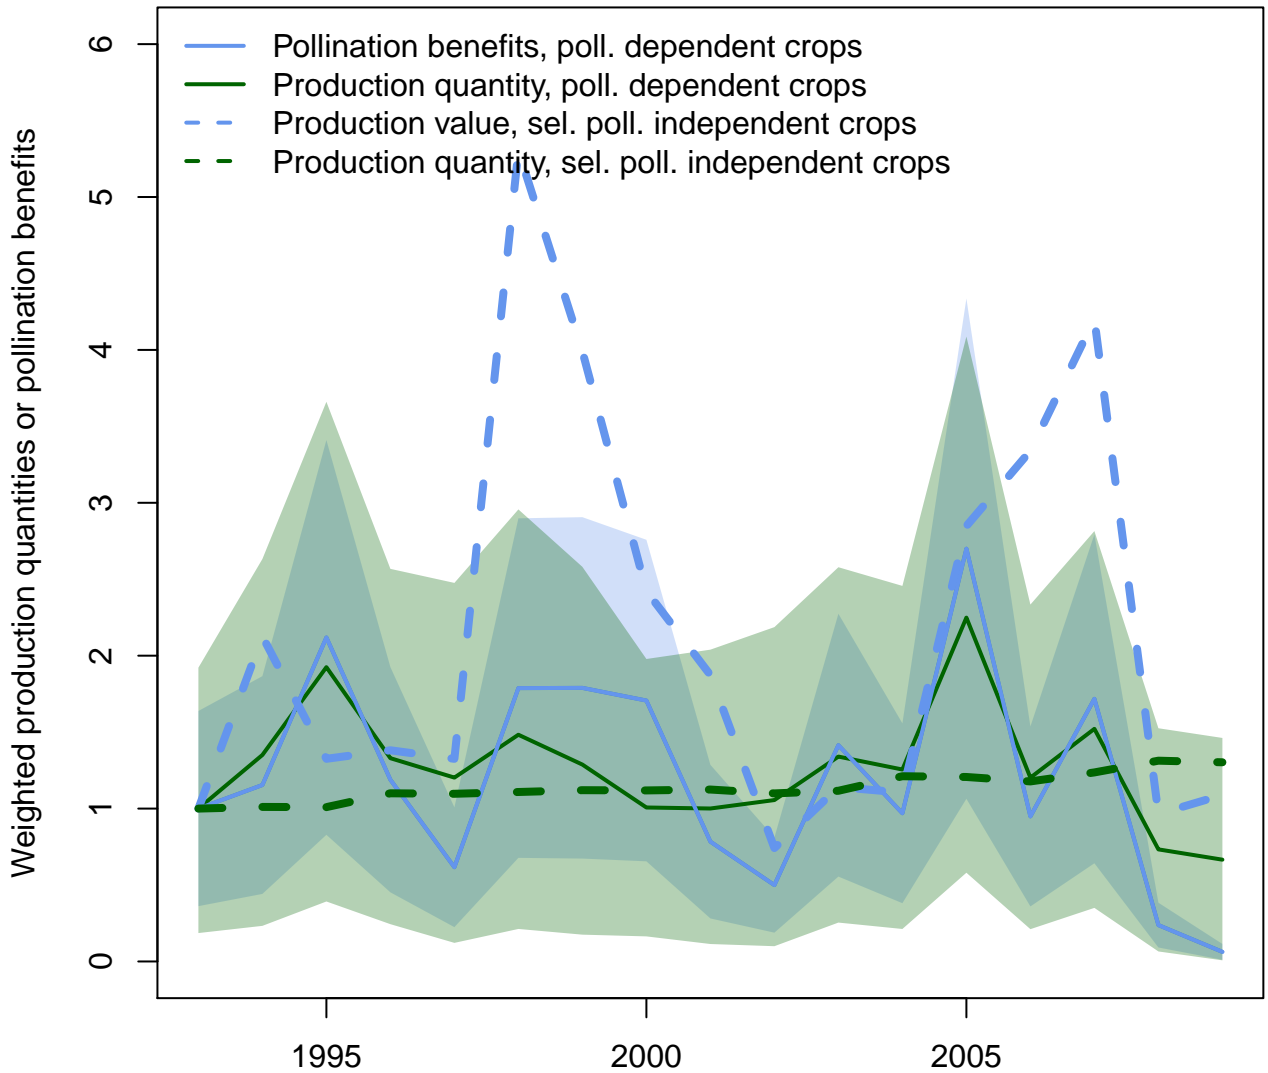

# Eritrea

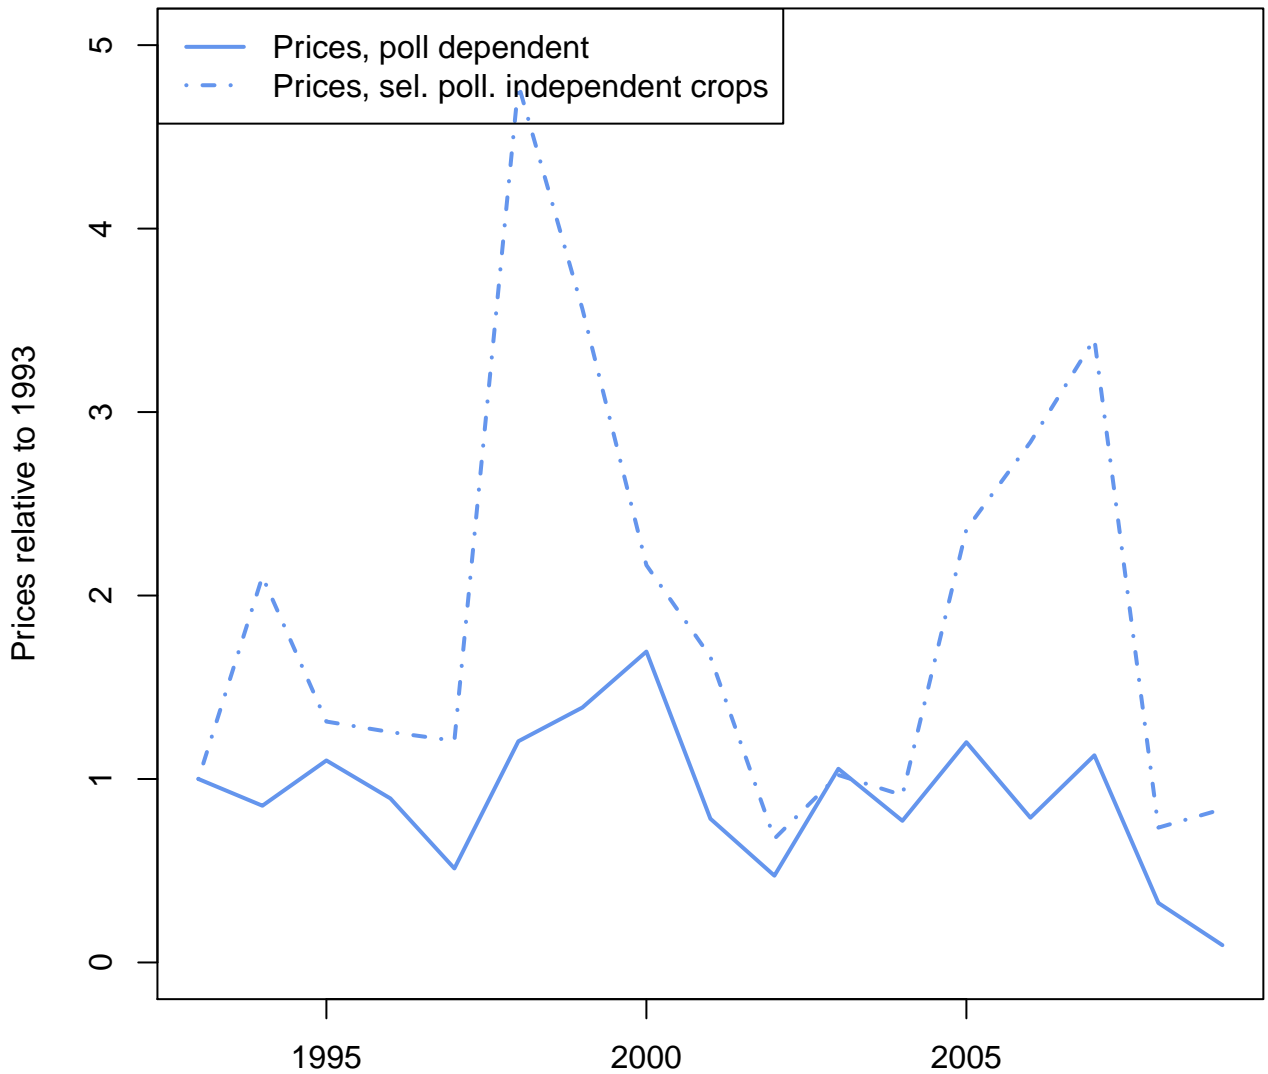



# Estonia

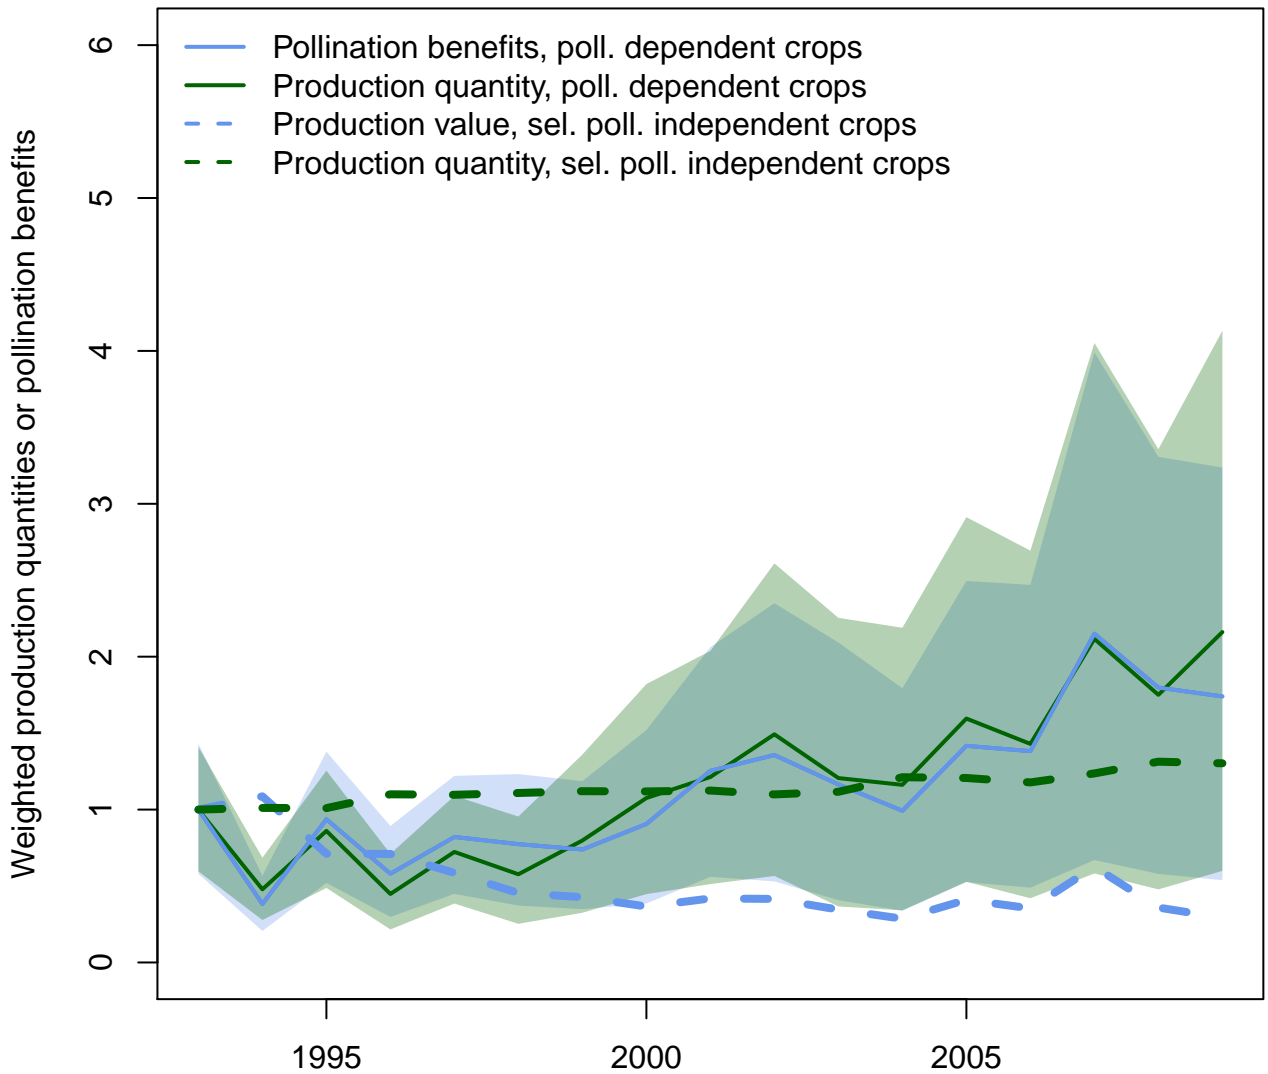

# Estonia

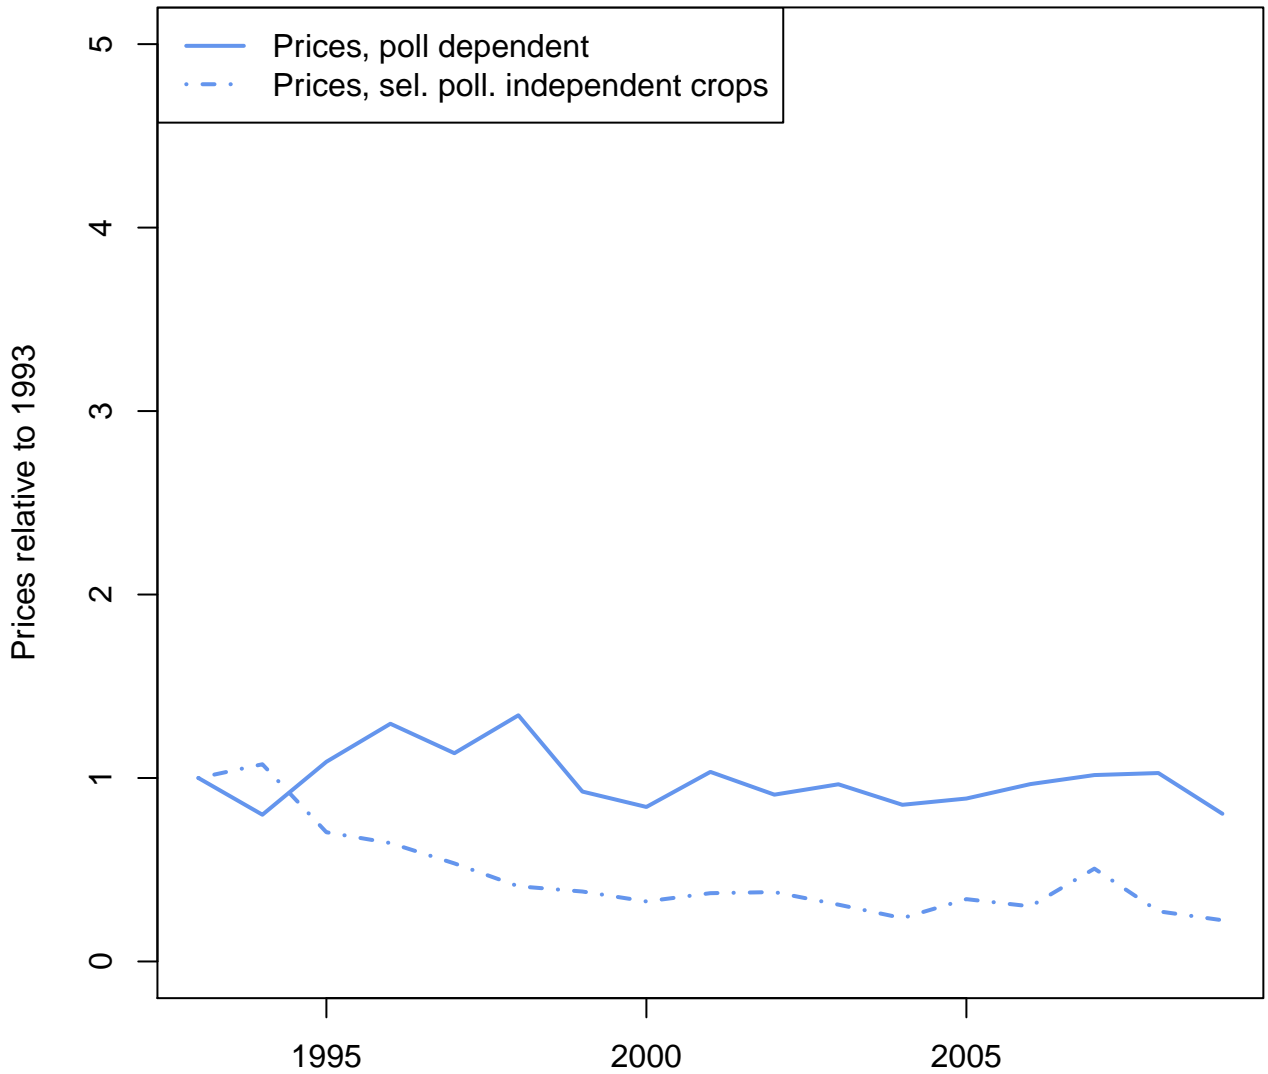

# Ethiopia

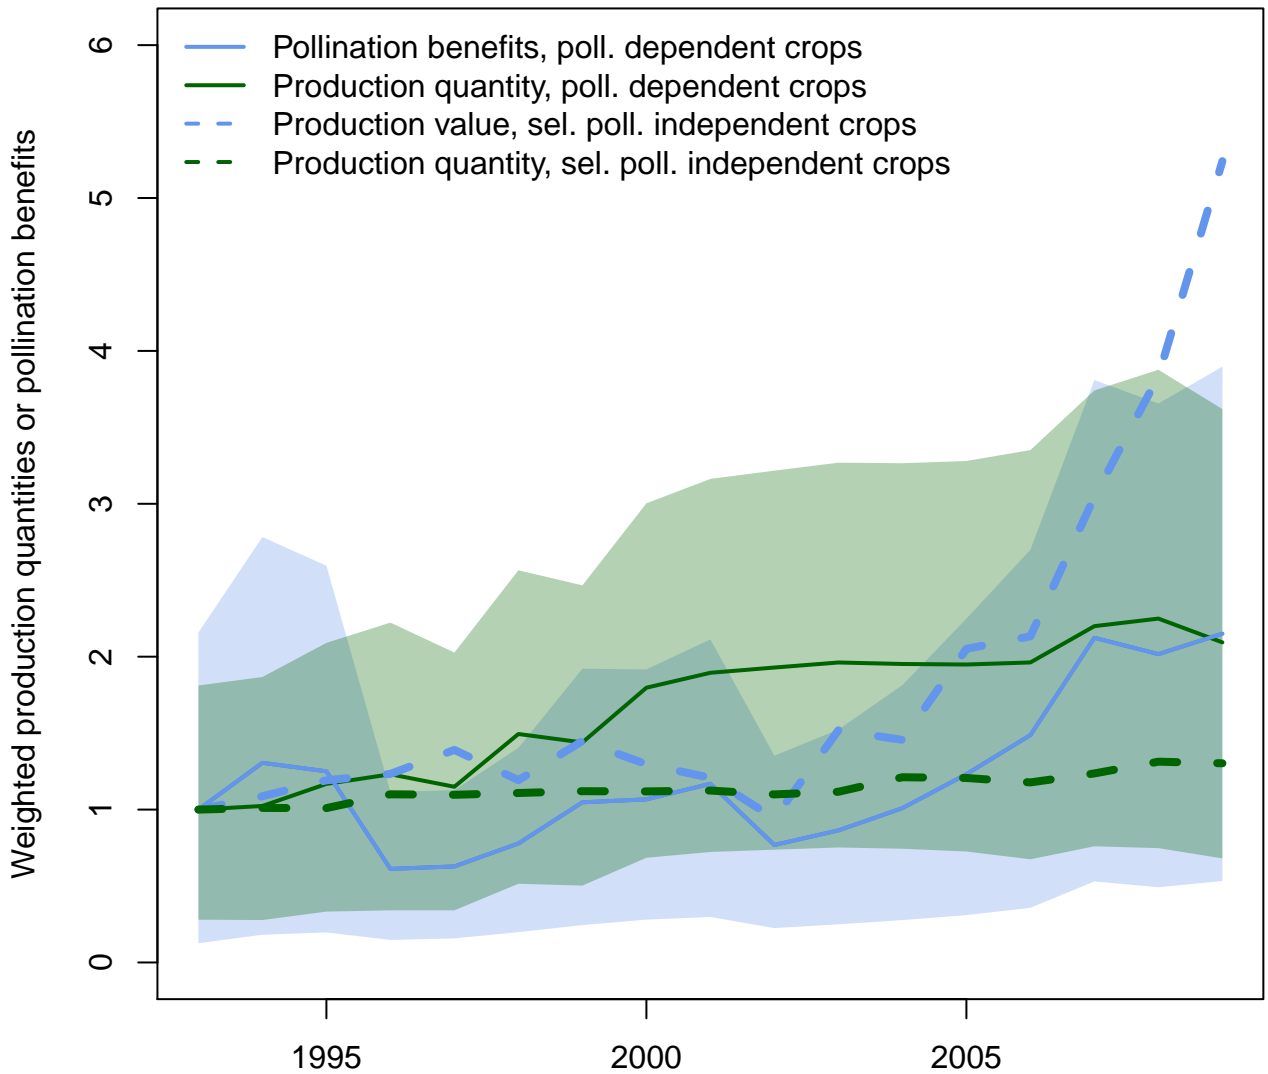

# Ethiopia

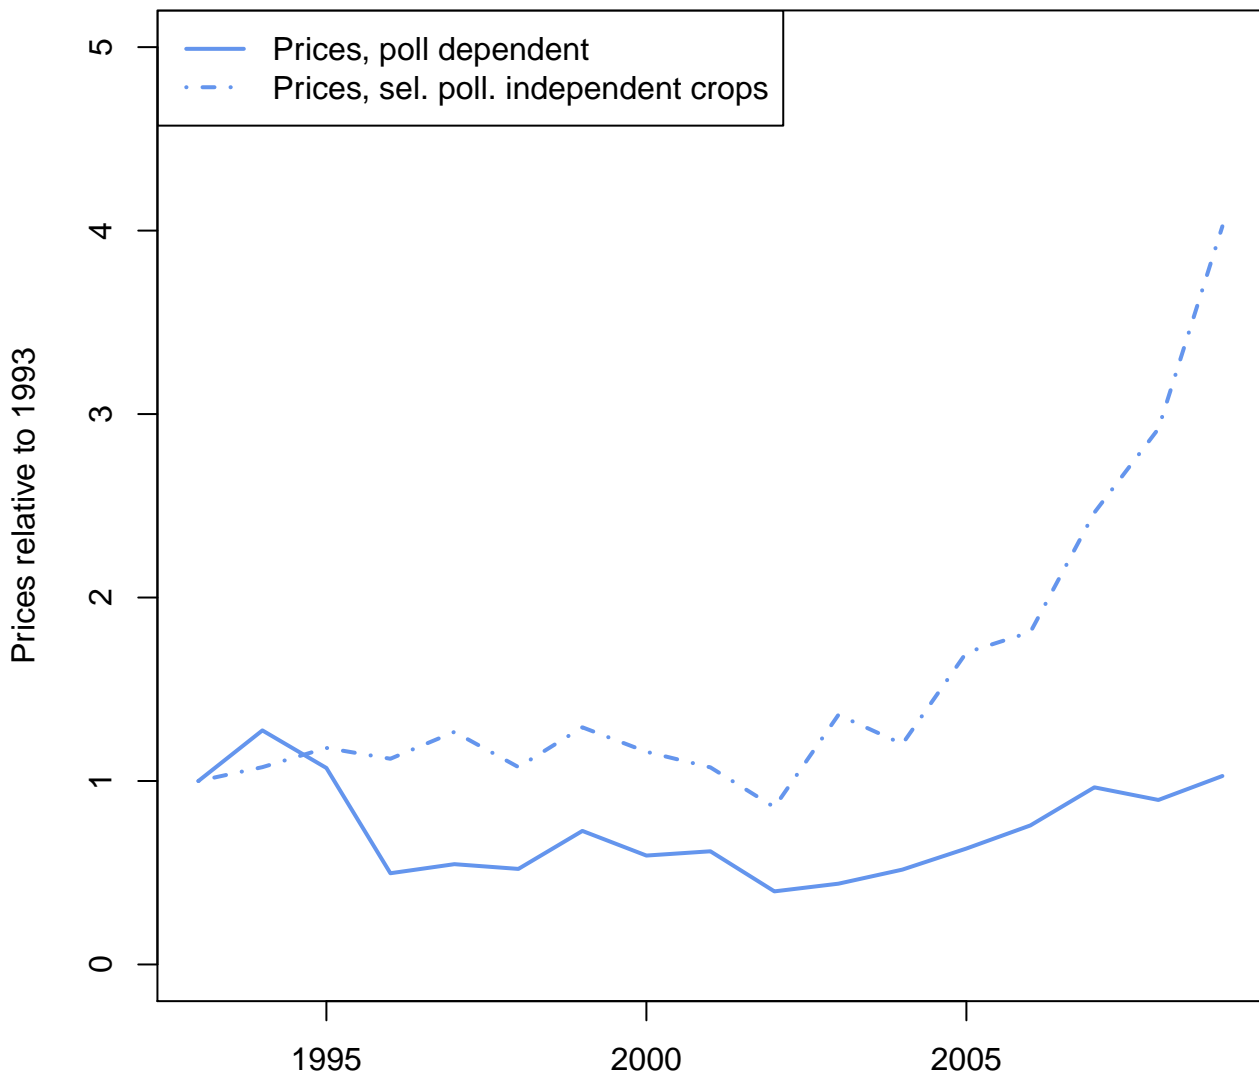

# Fiji

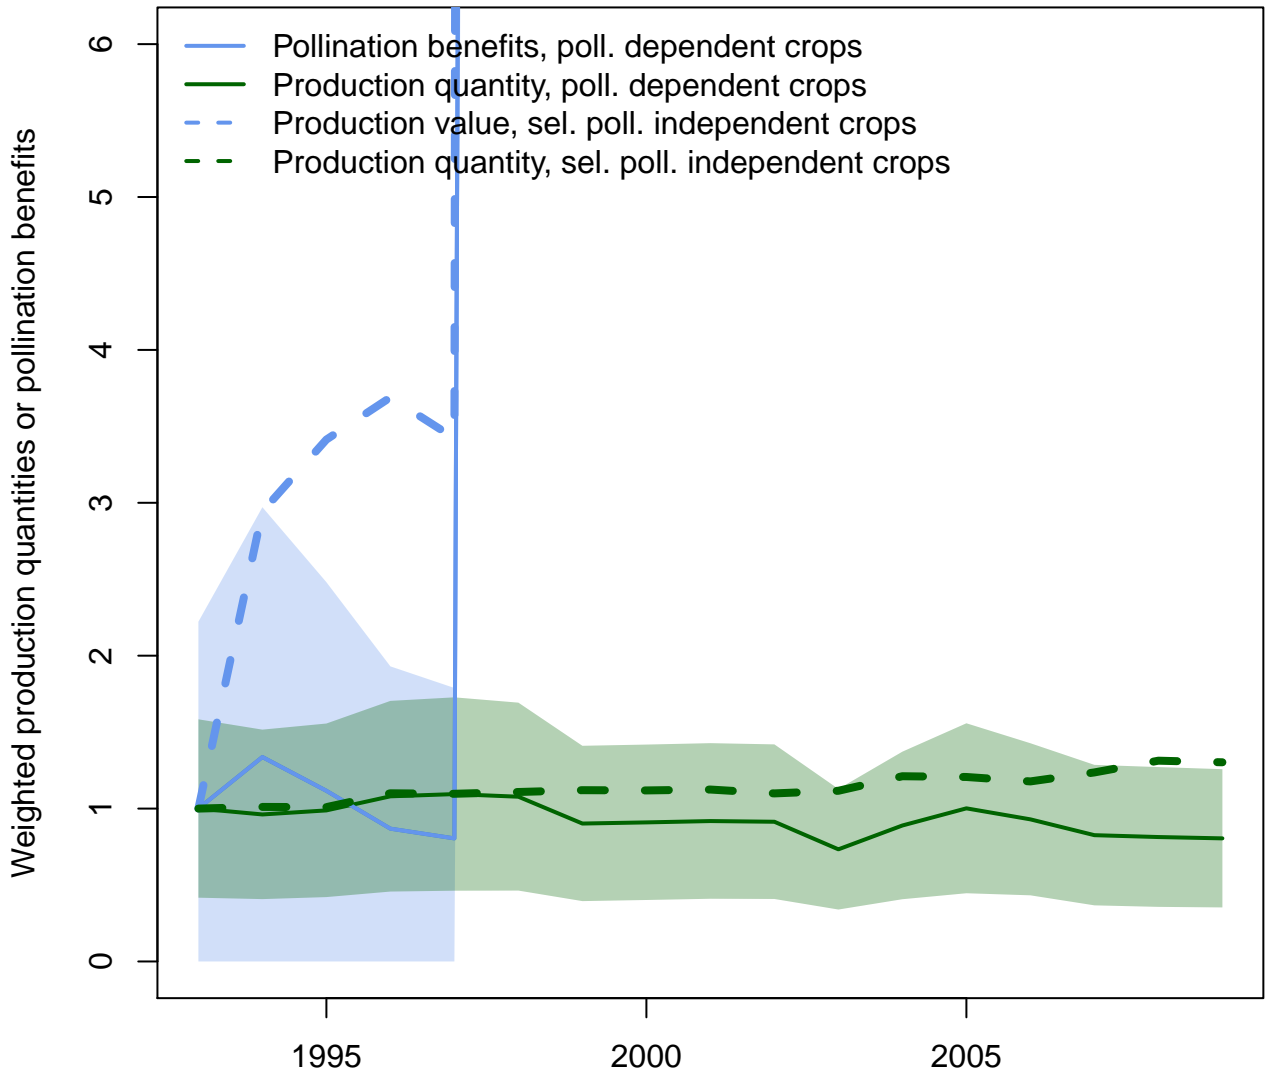

# Fiji

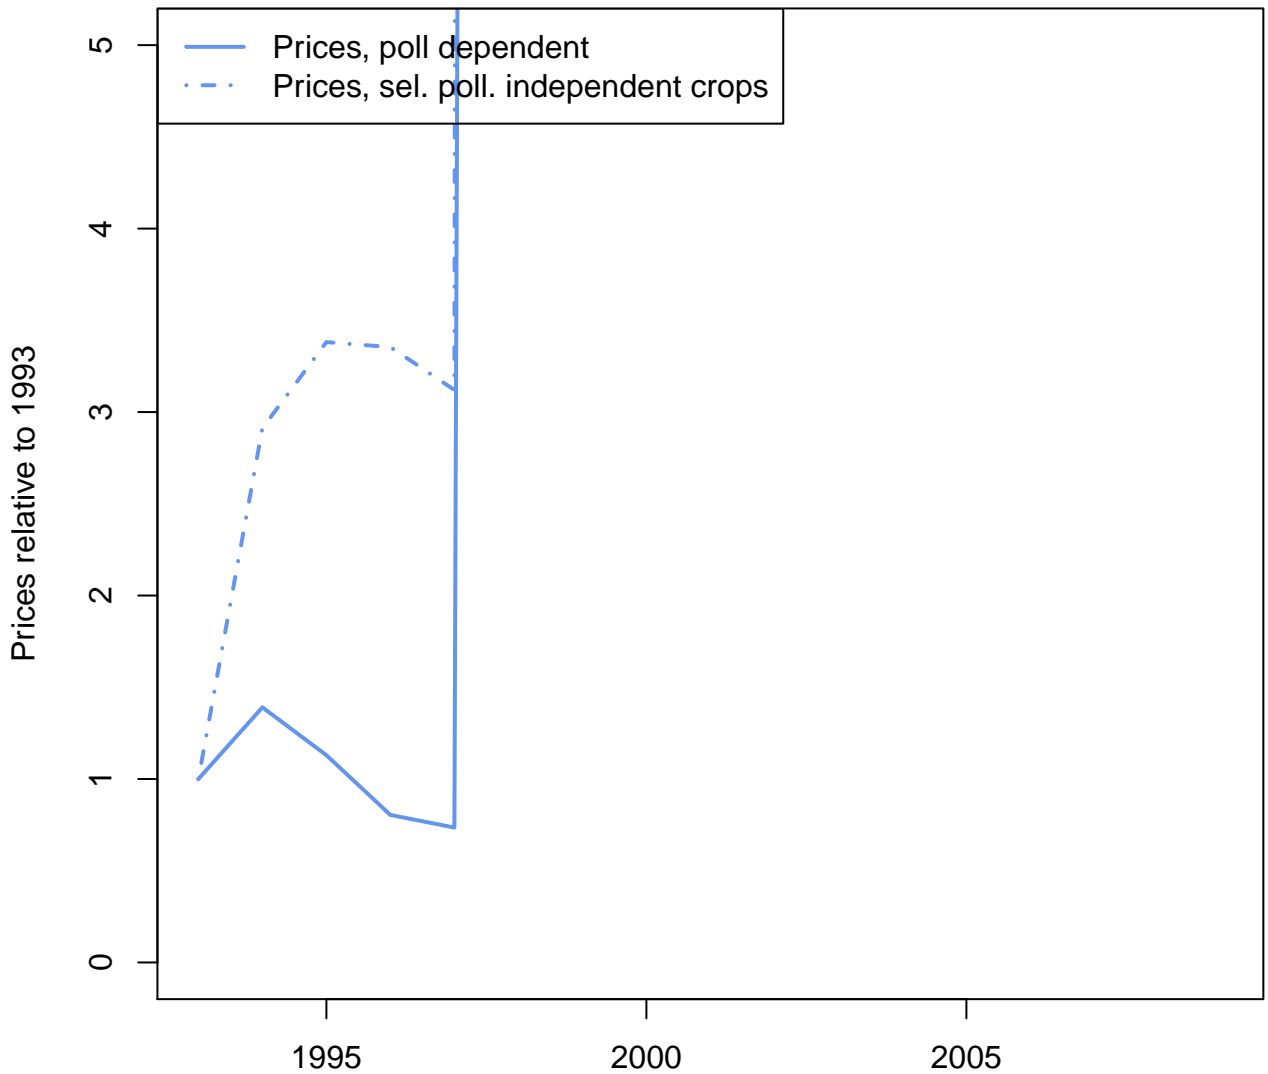

# Finland

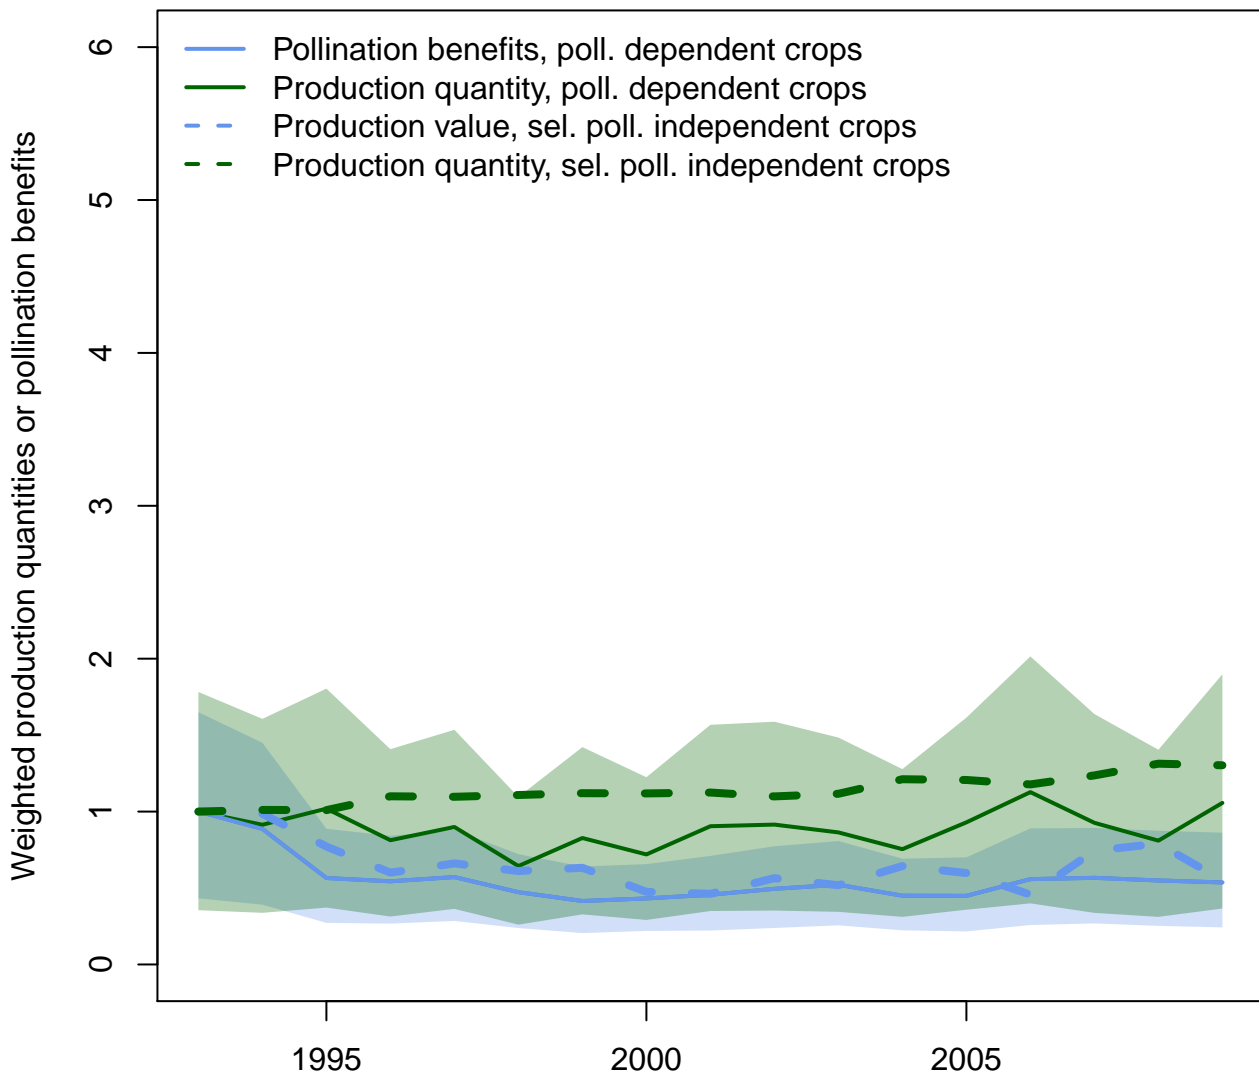

# Finland

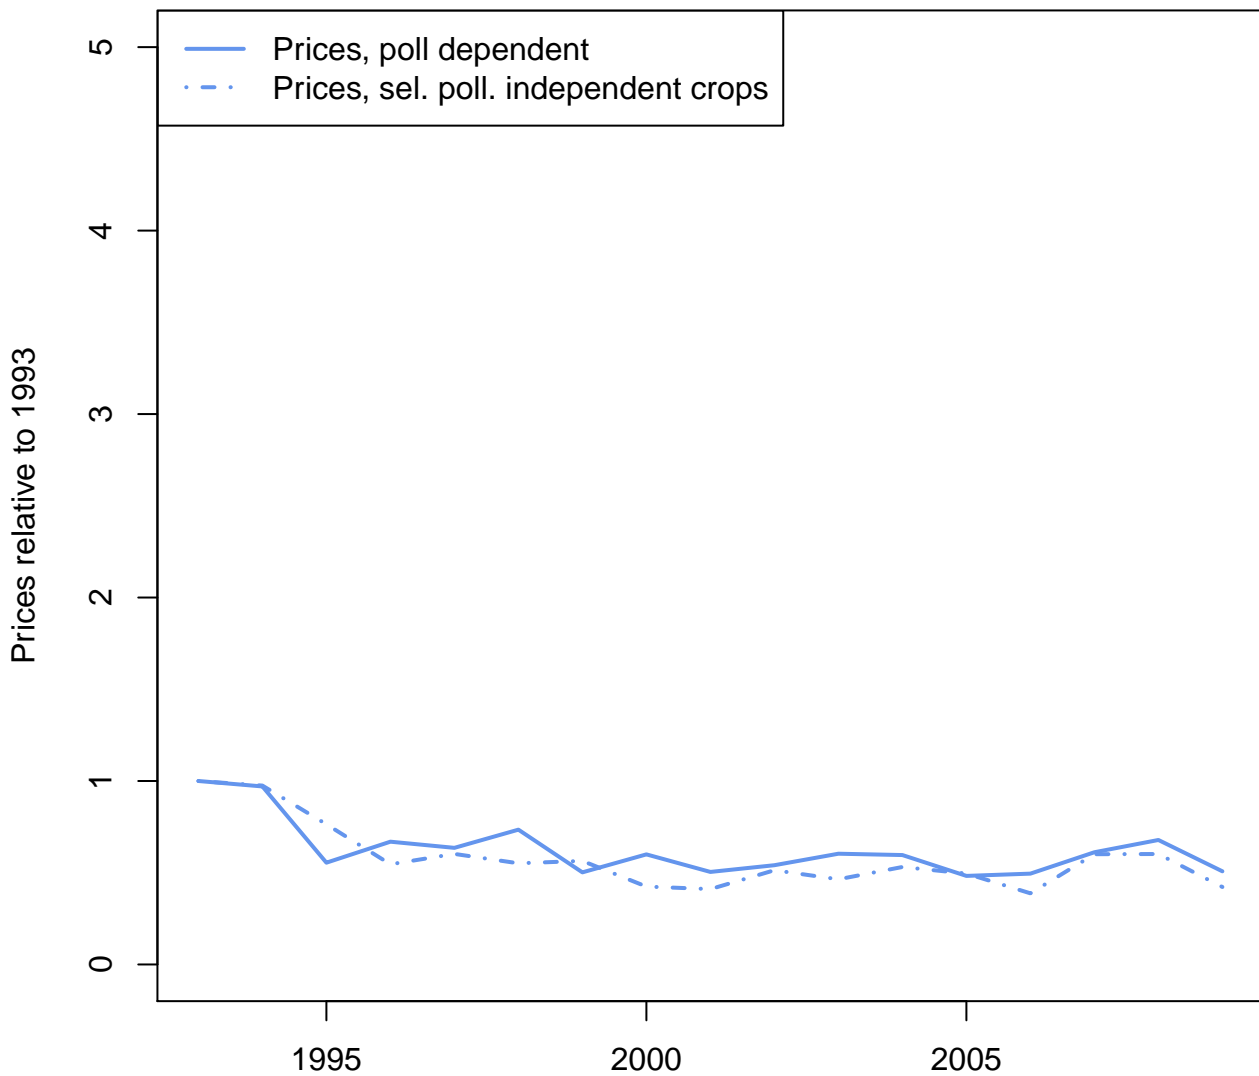



# France

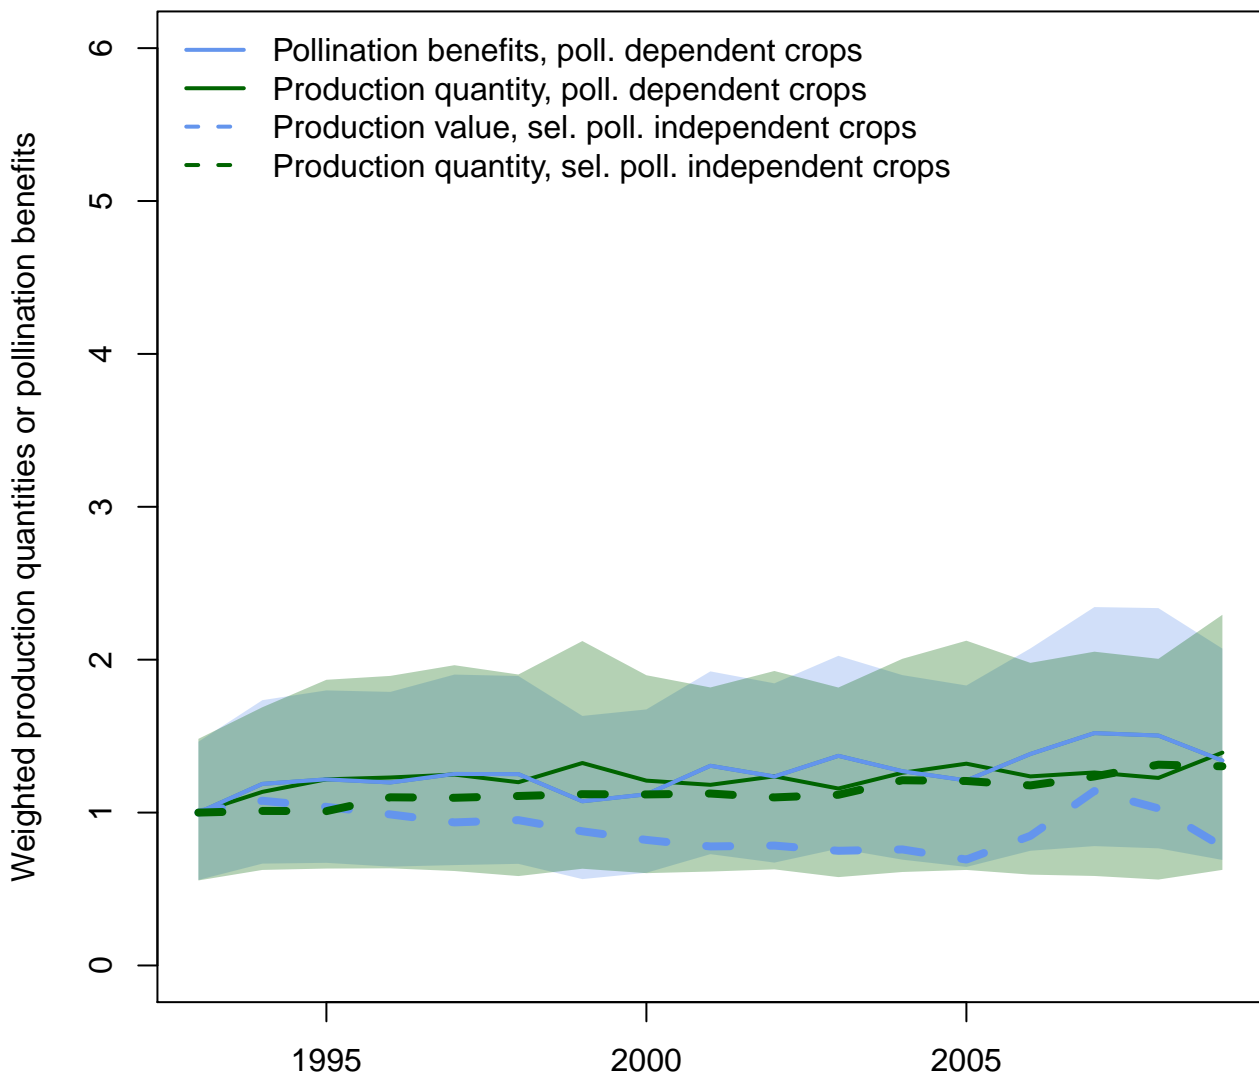

## France

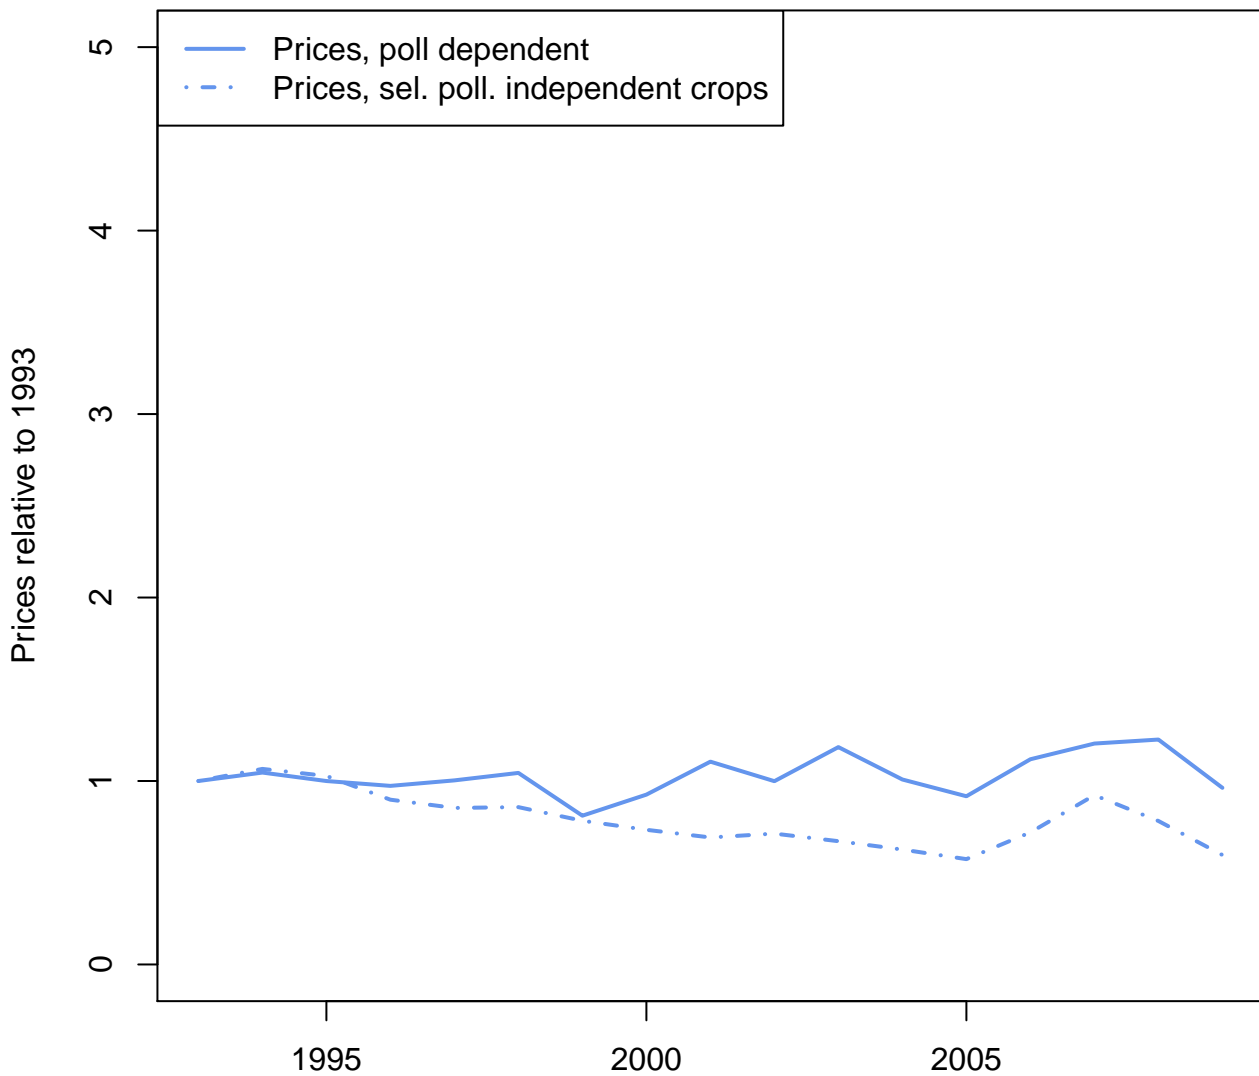

# Gambia

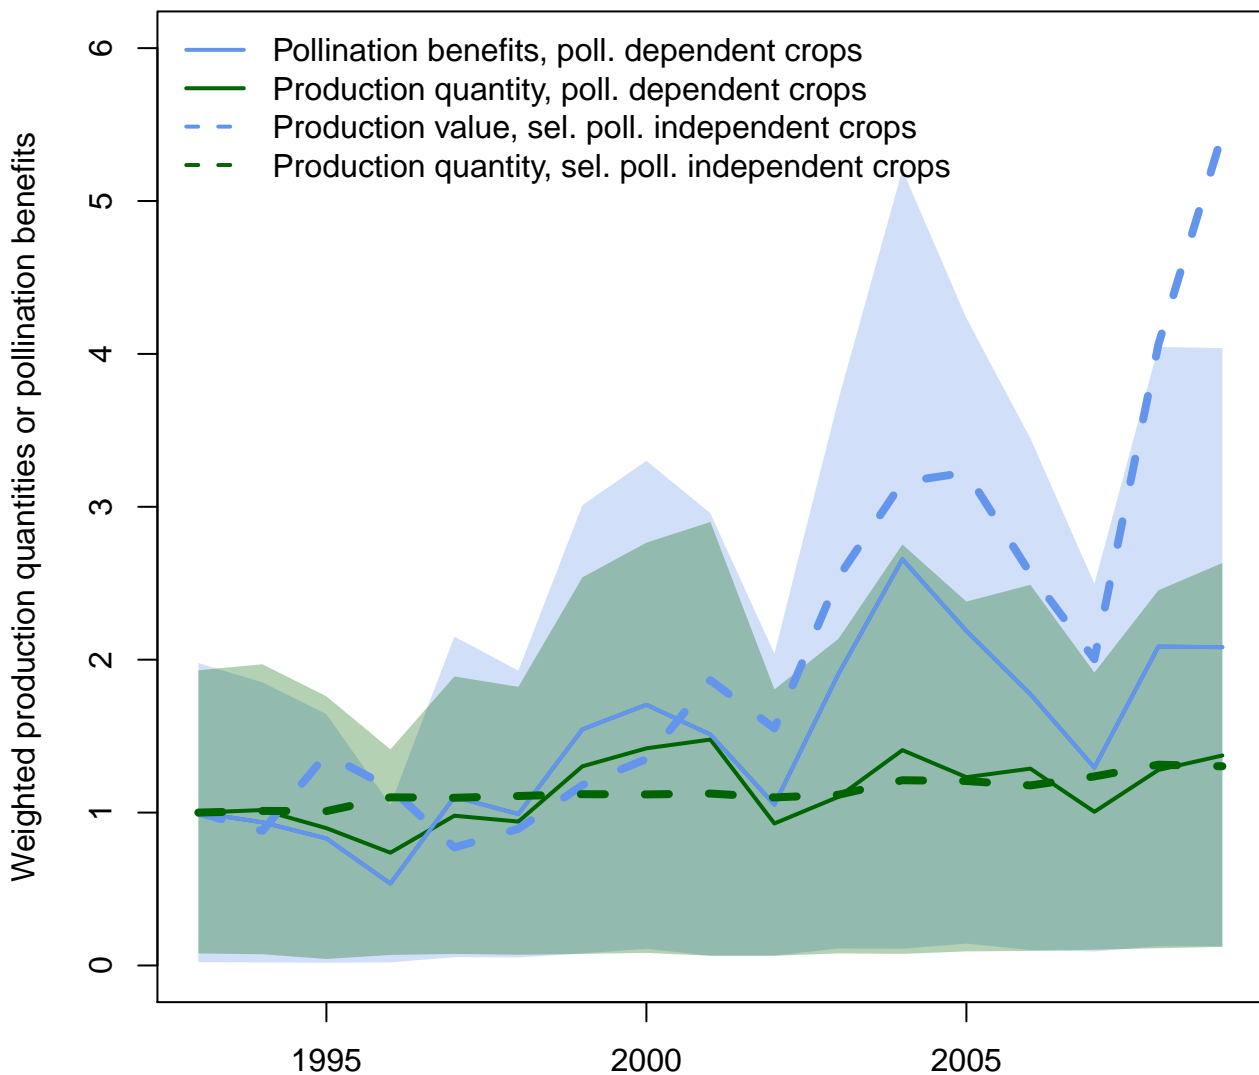

# Gambia

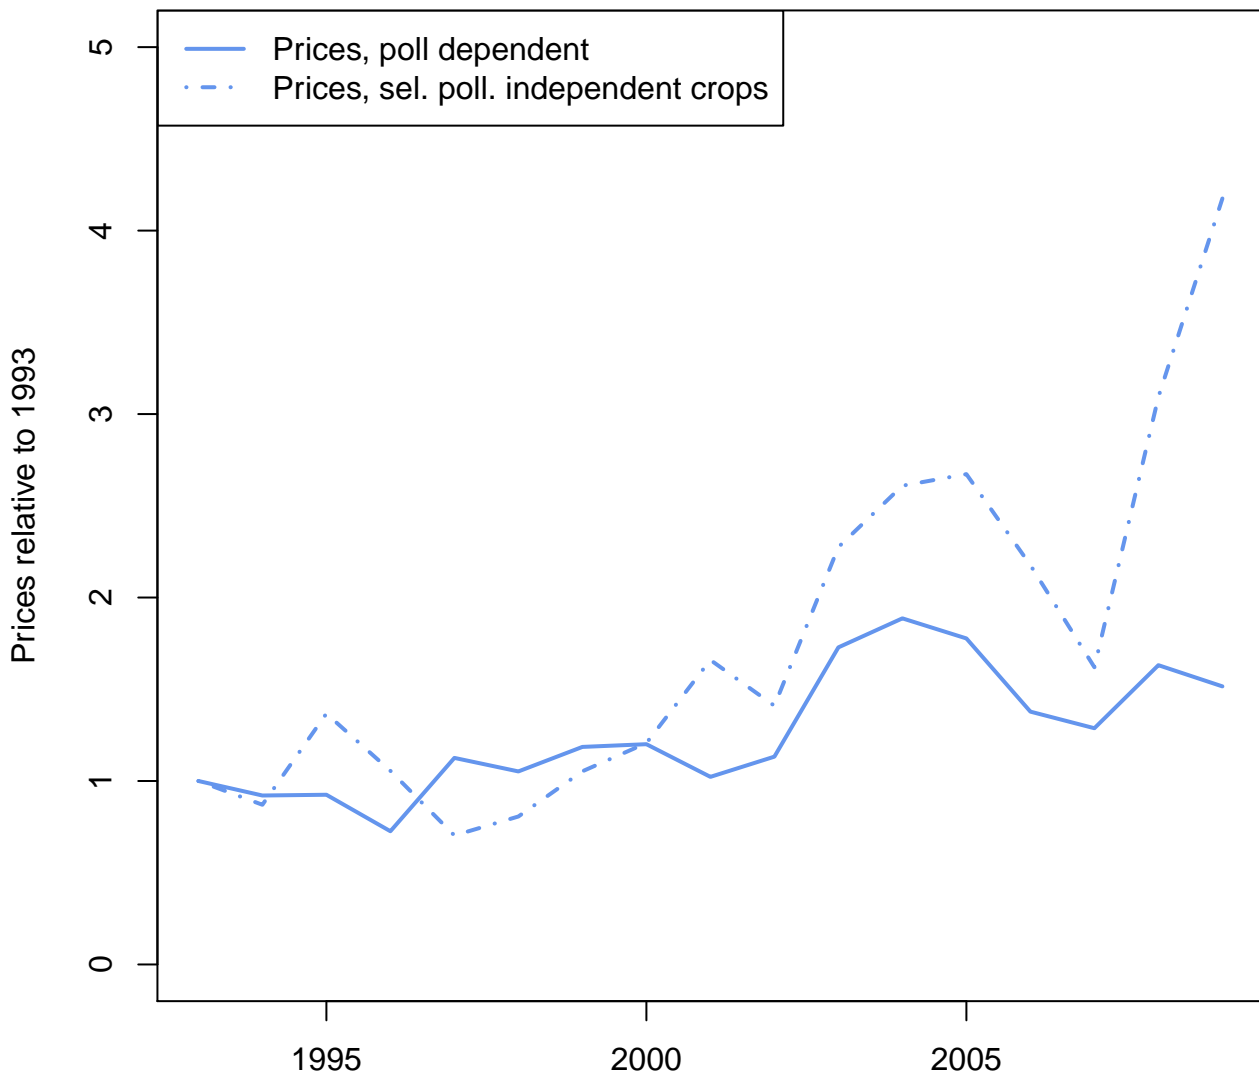

# Georgia

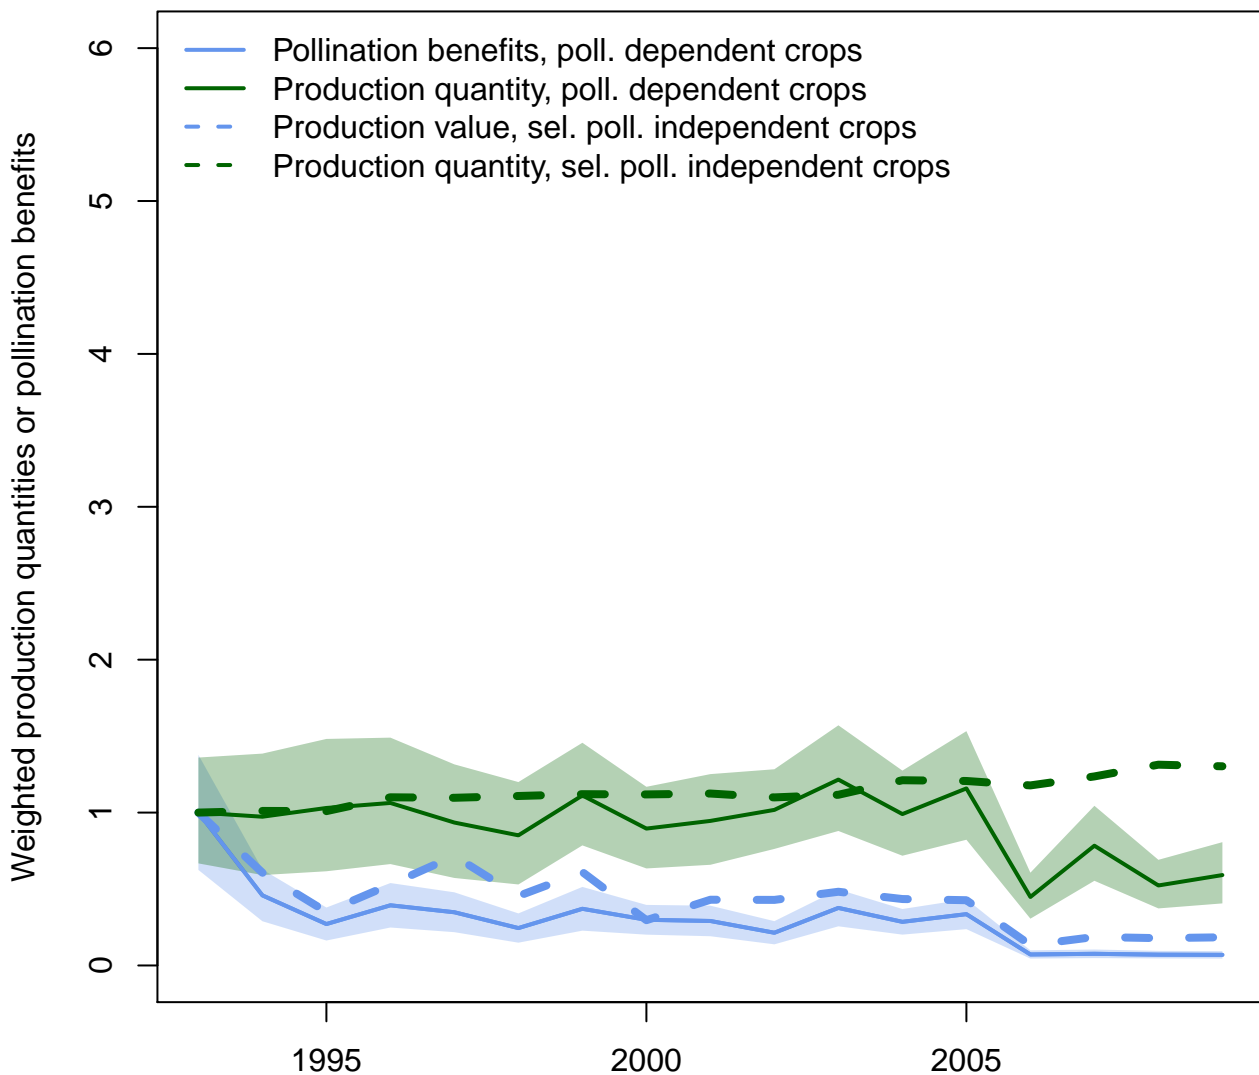

# Georgia

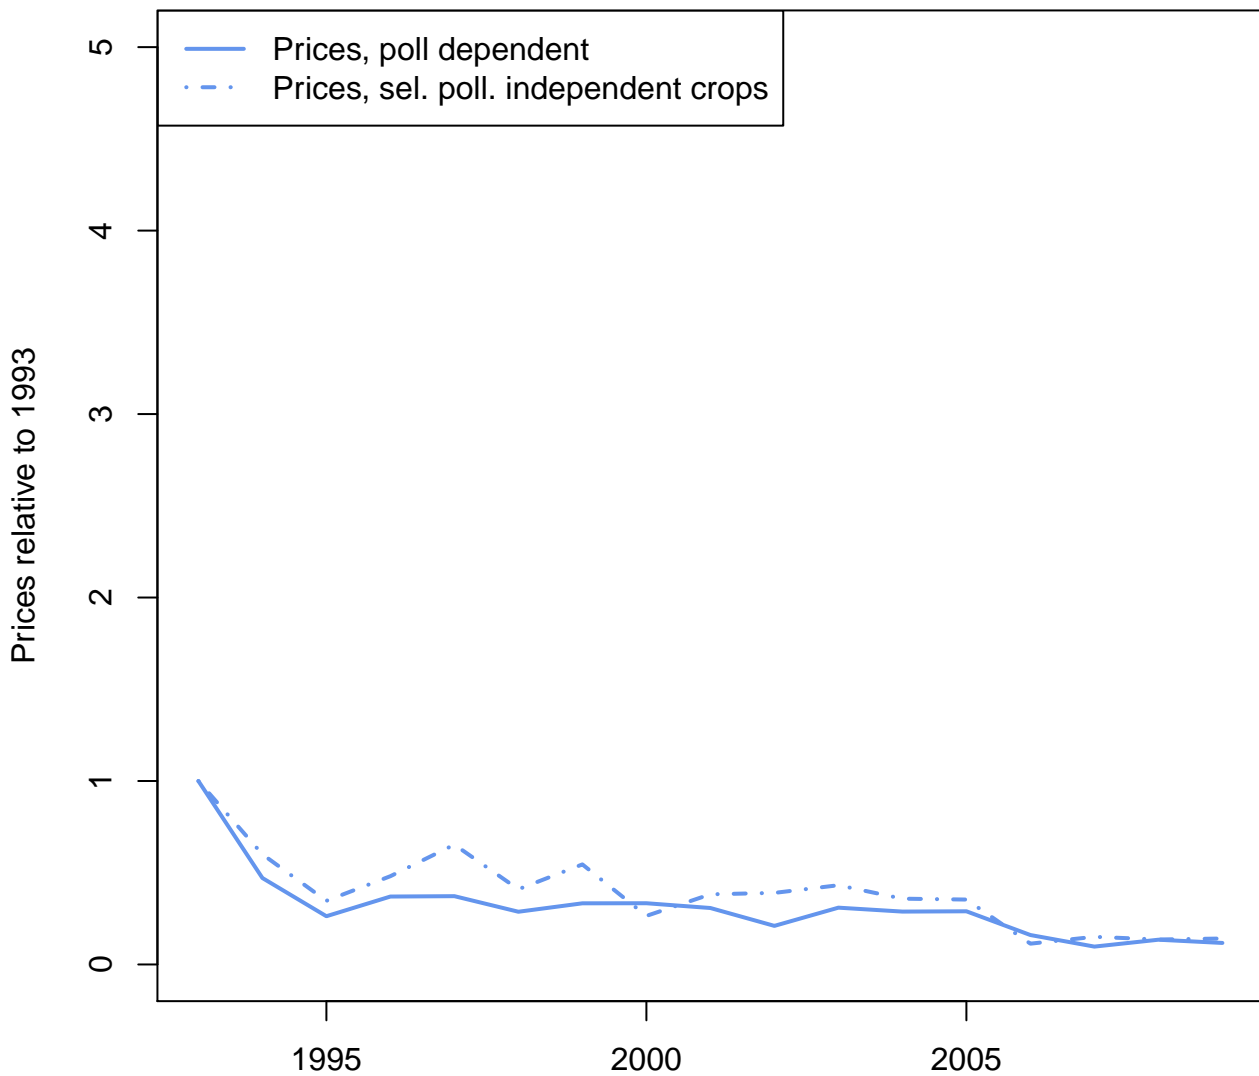

# Germany

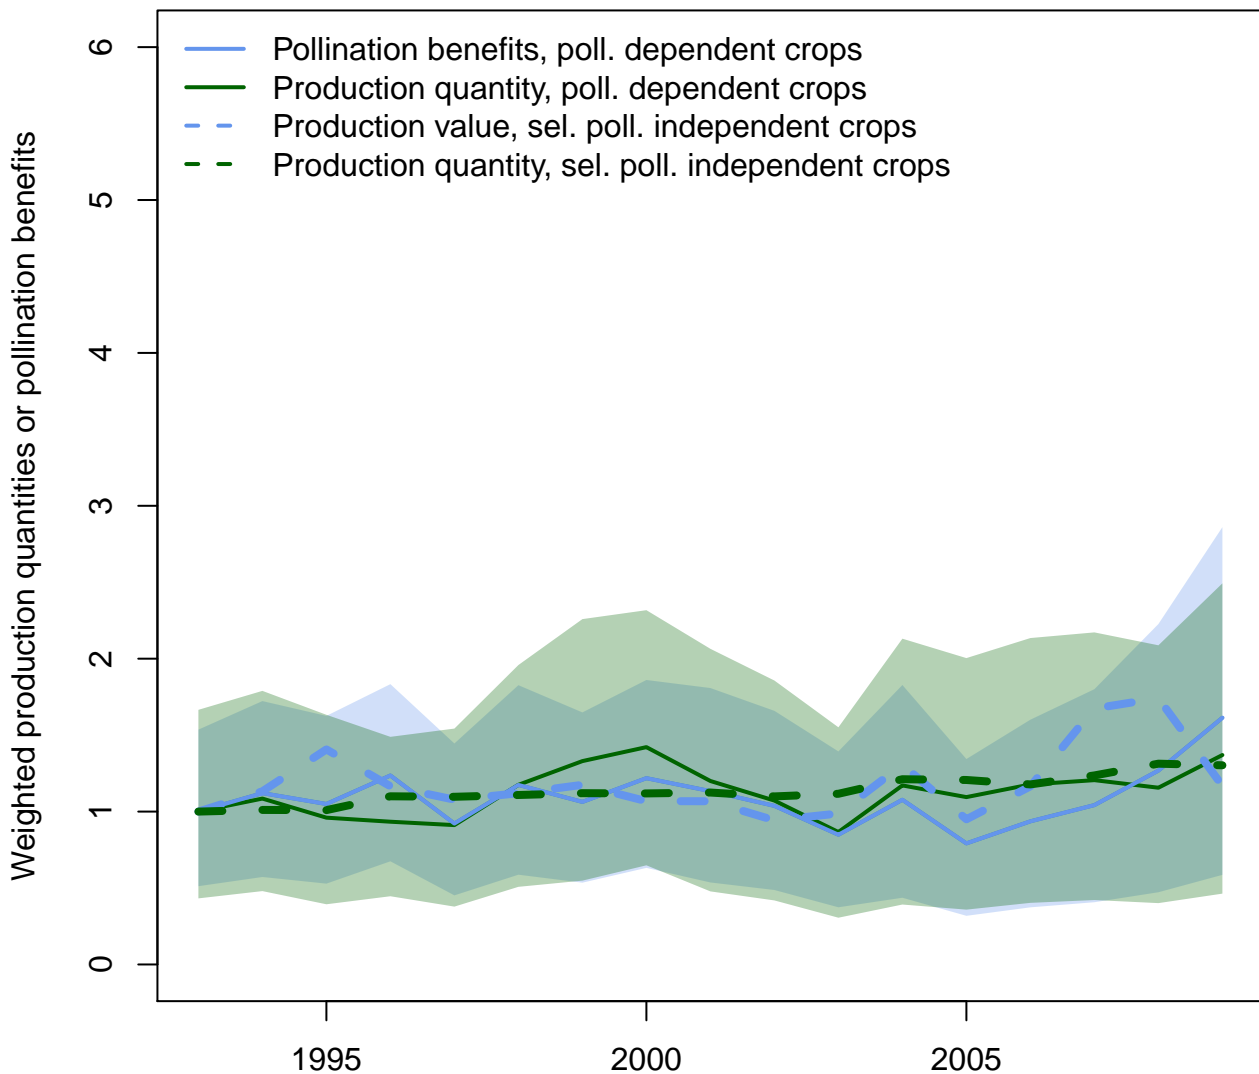

# Germany

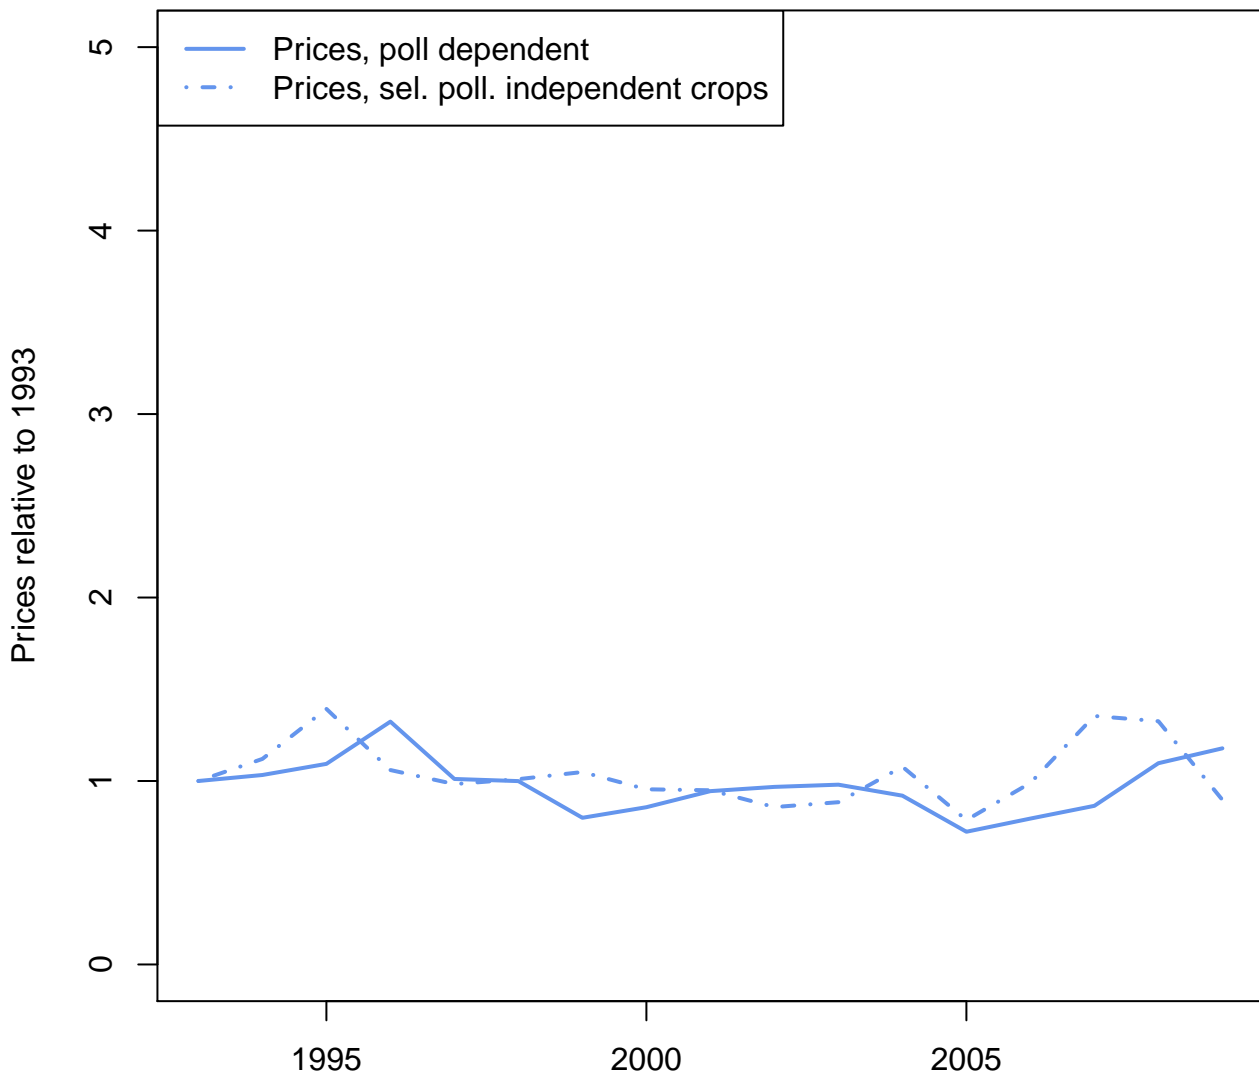



# Ghana

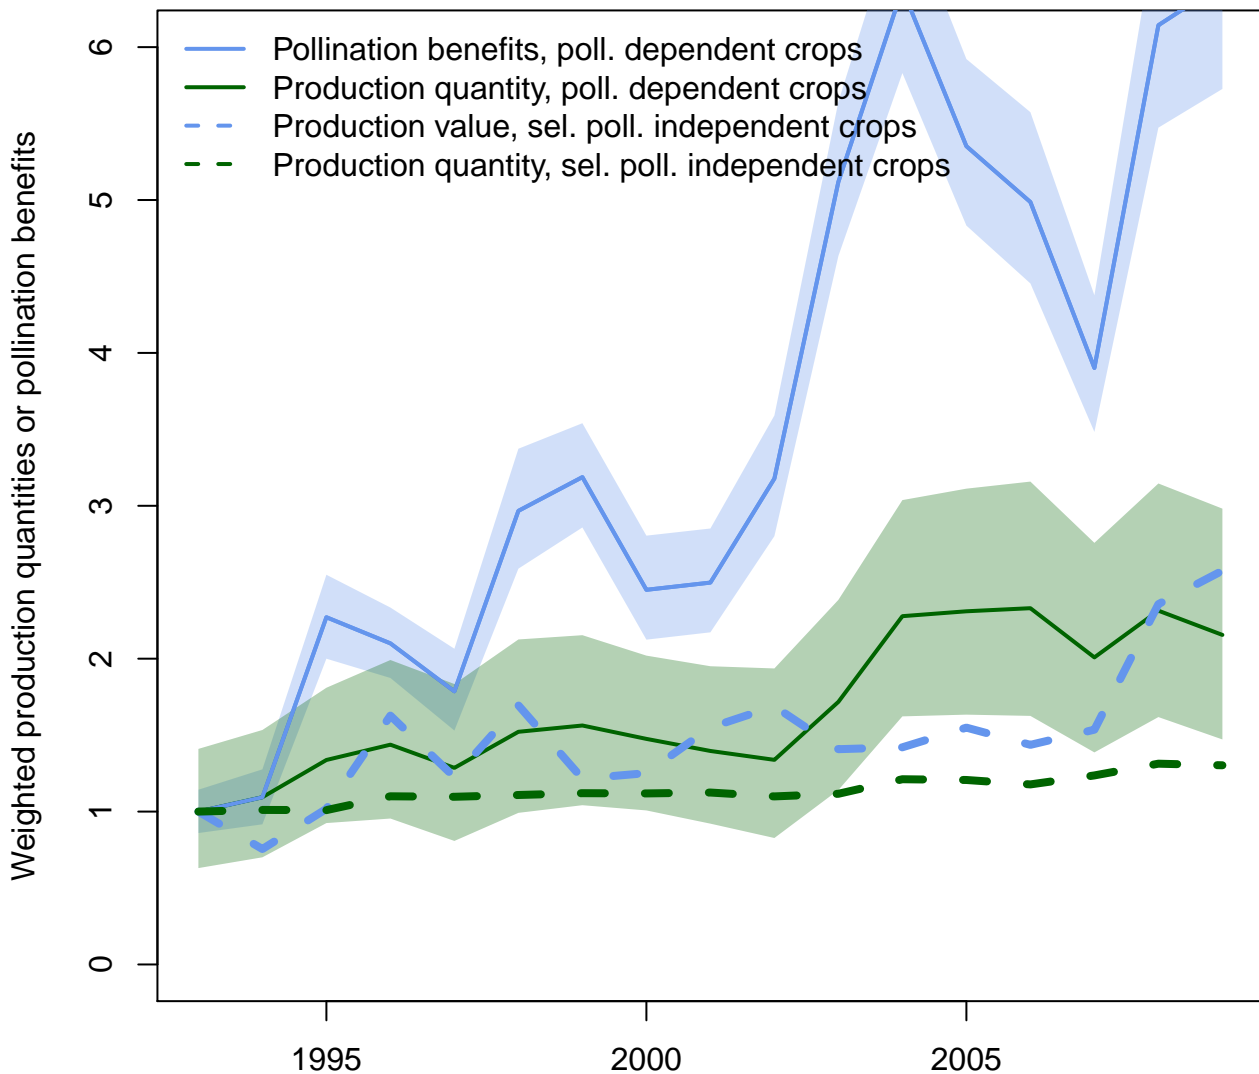

# Ghana

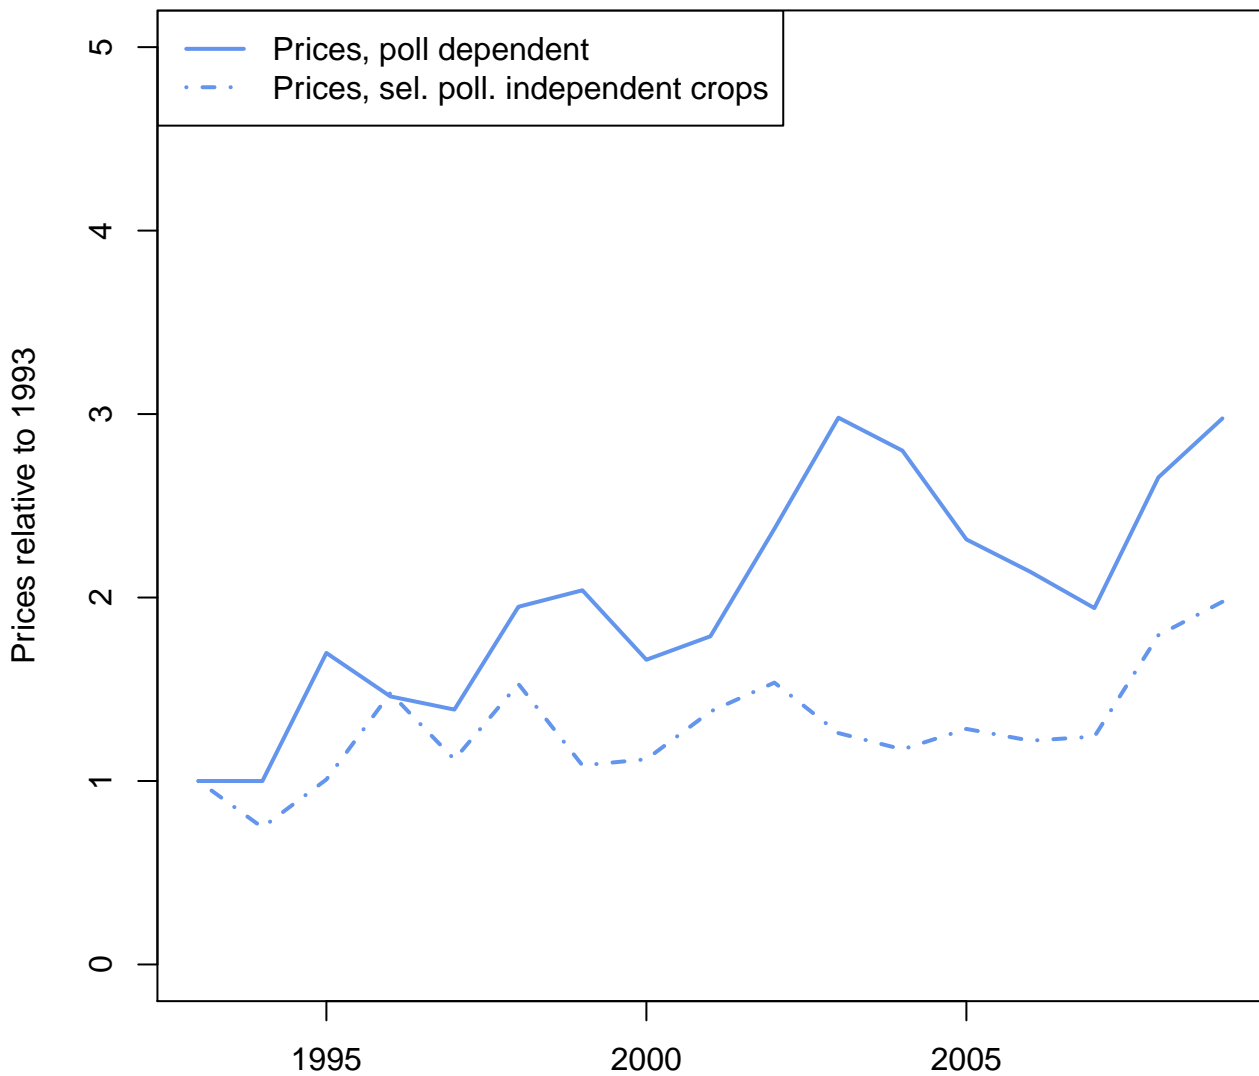

# Greece

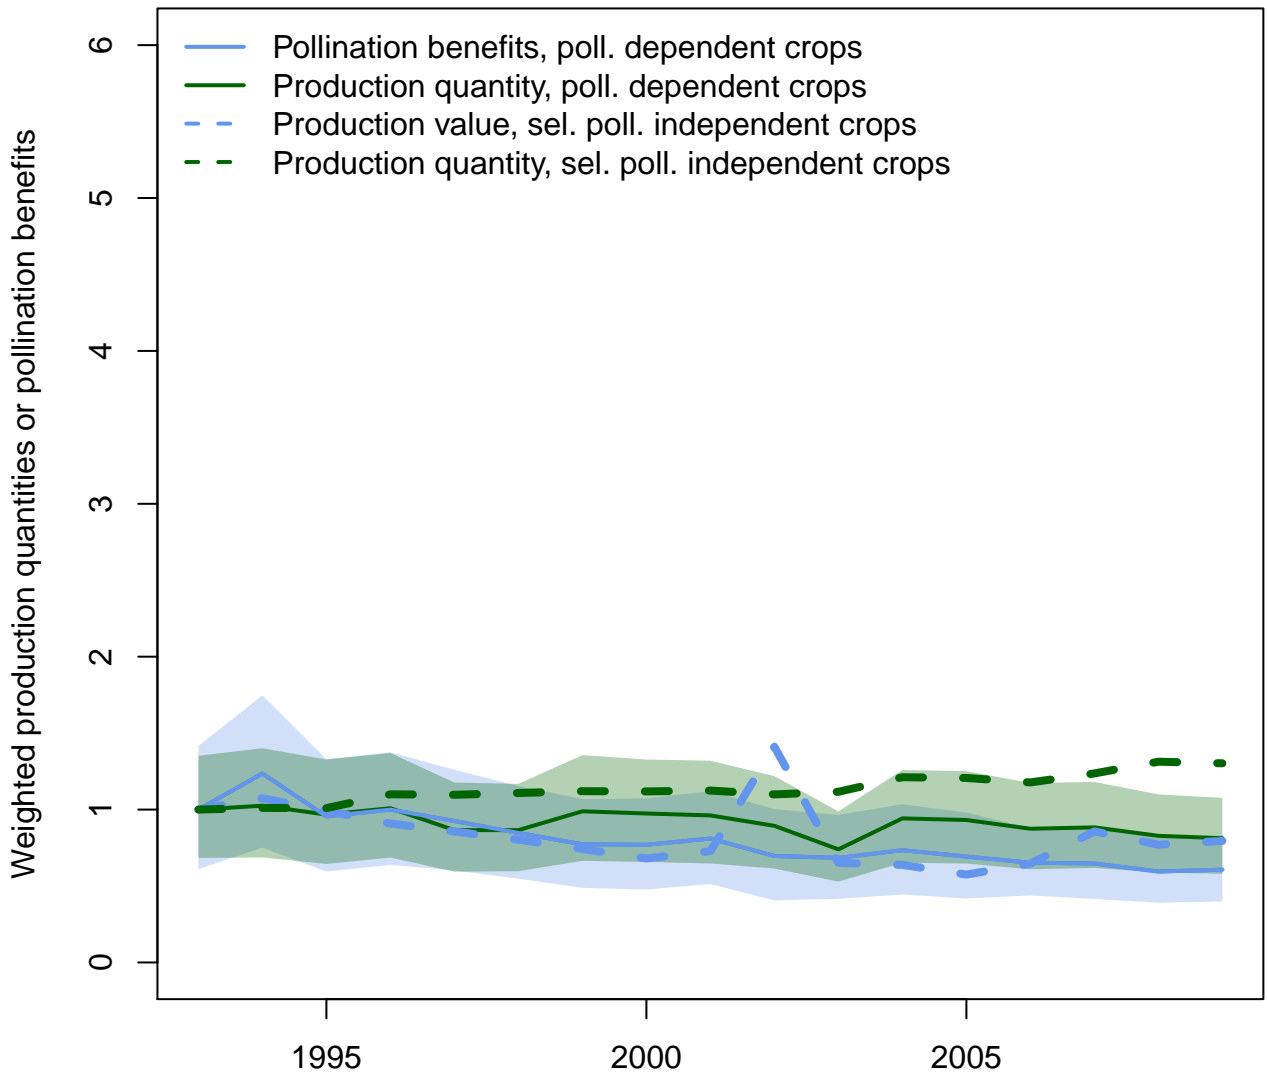

# Greece

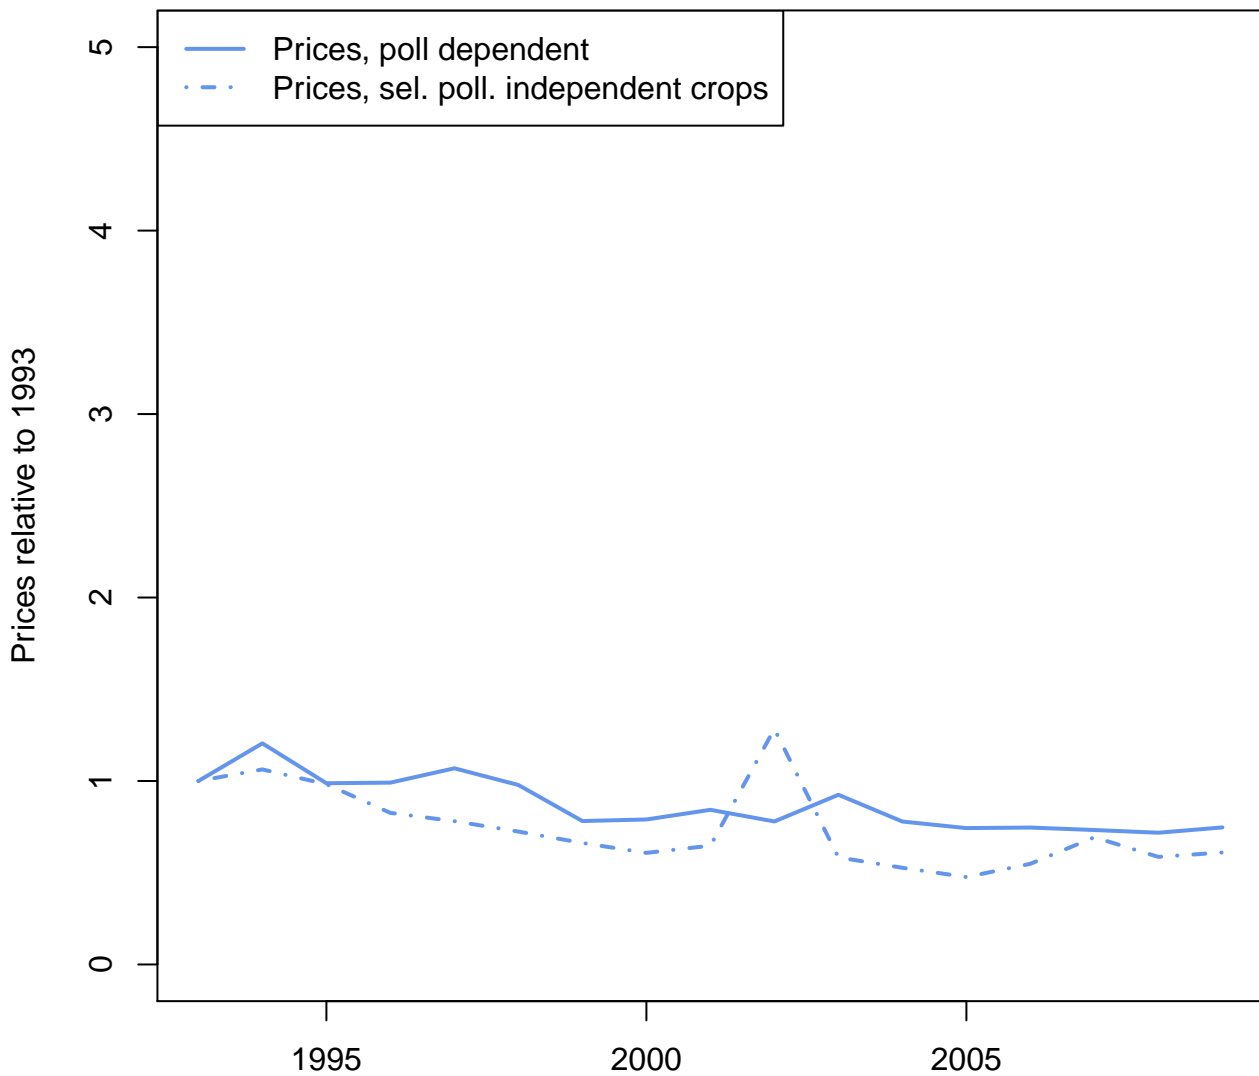

# Guinea

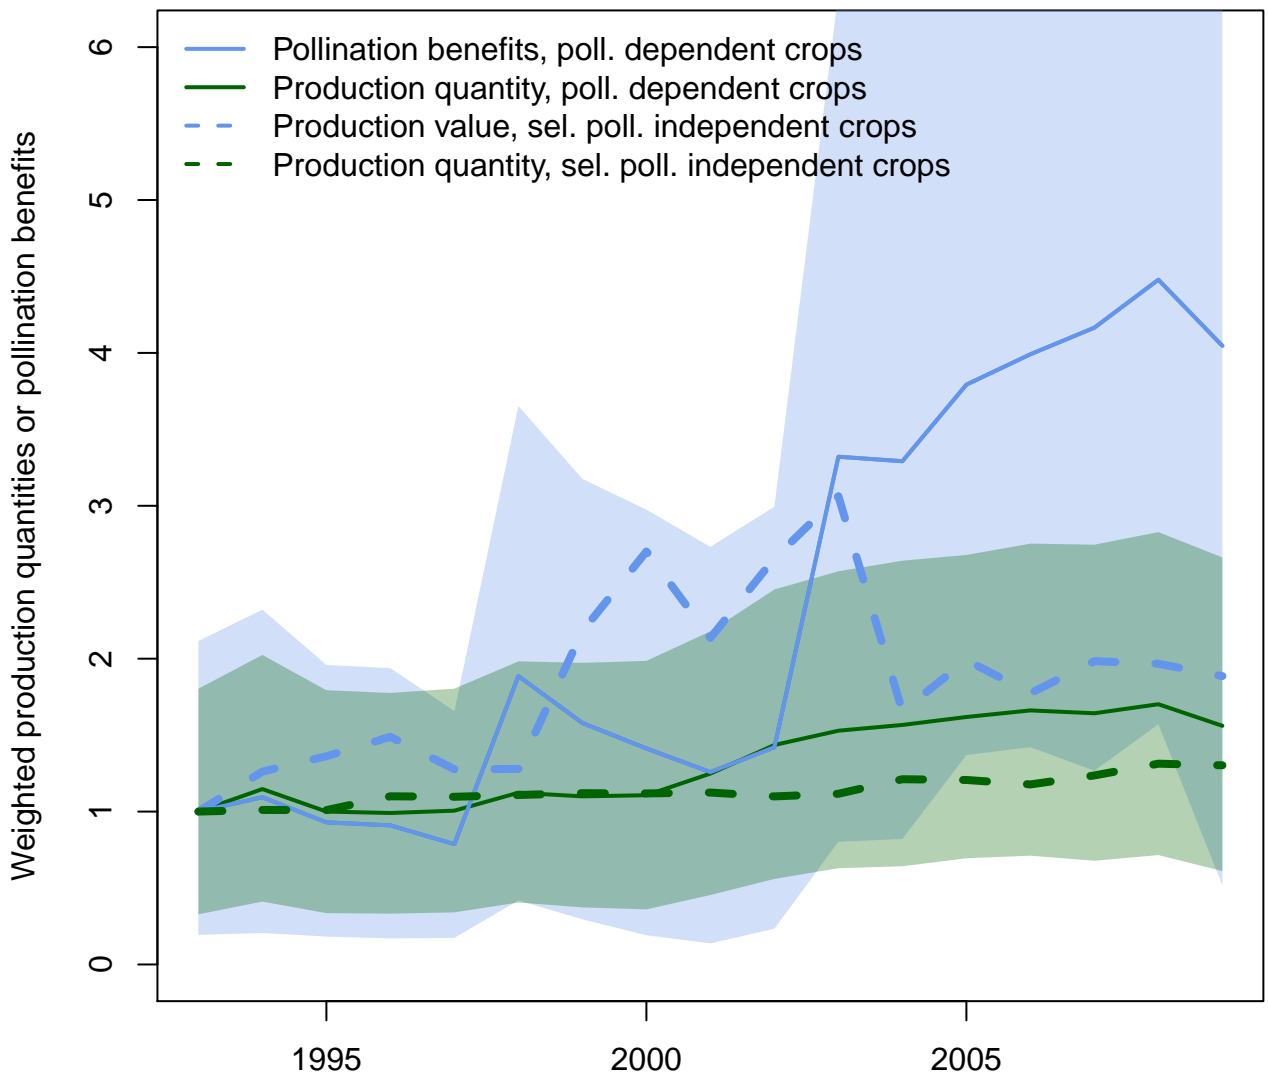

# Guinea

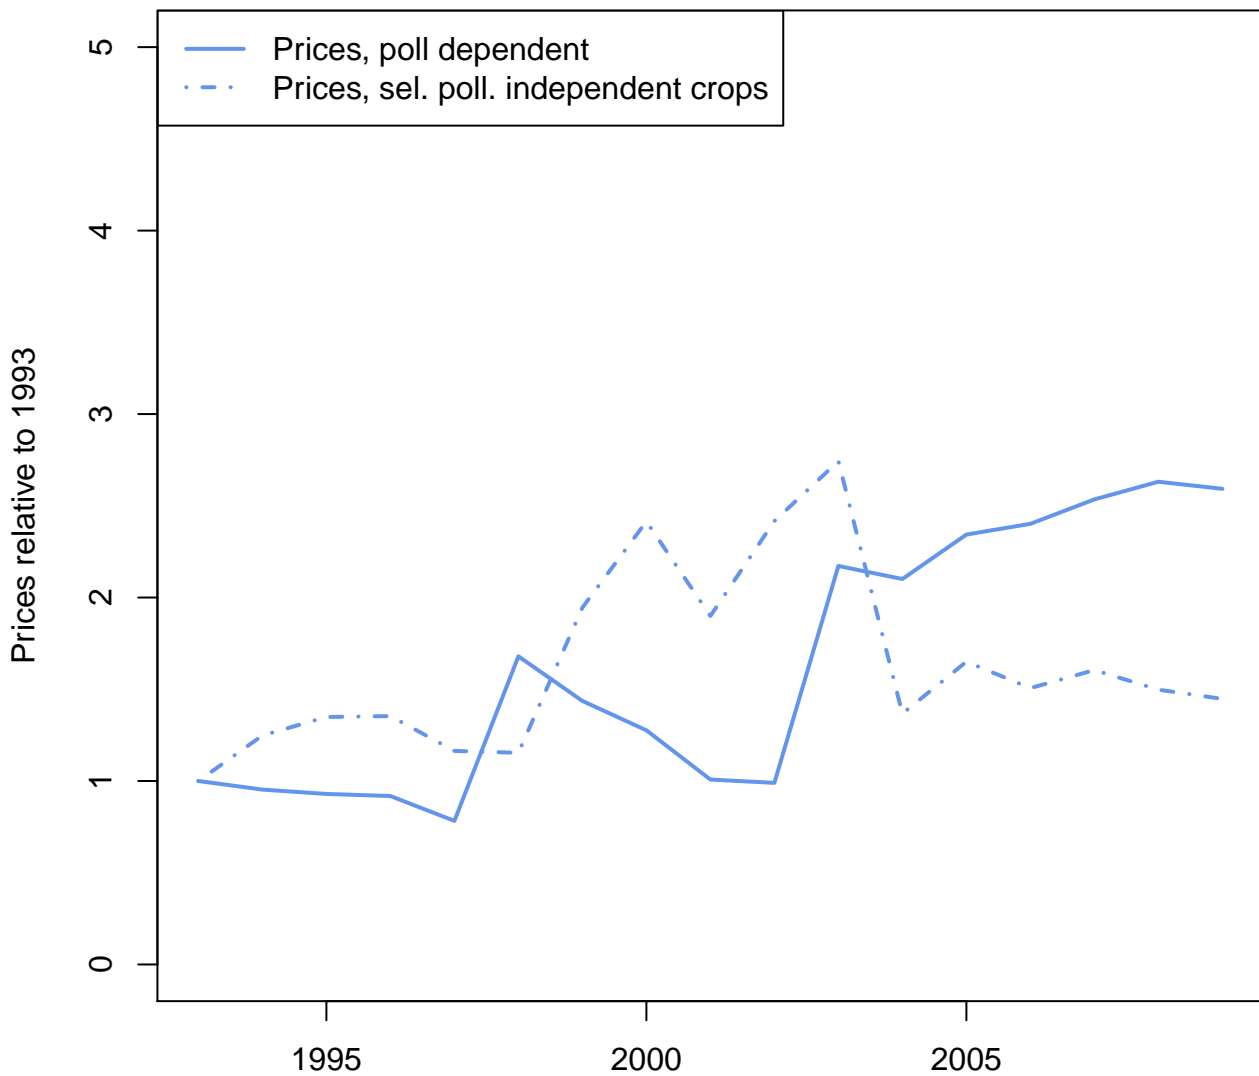

# Guinea-Bissau

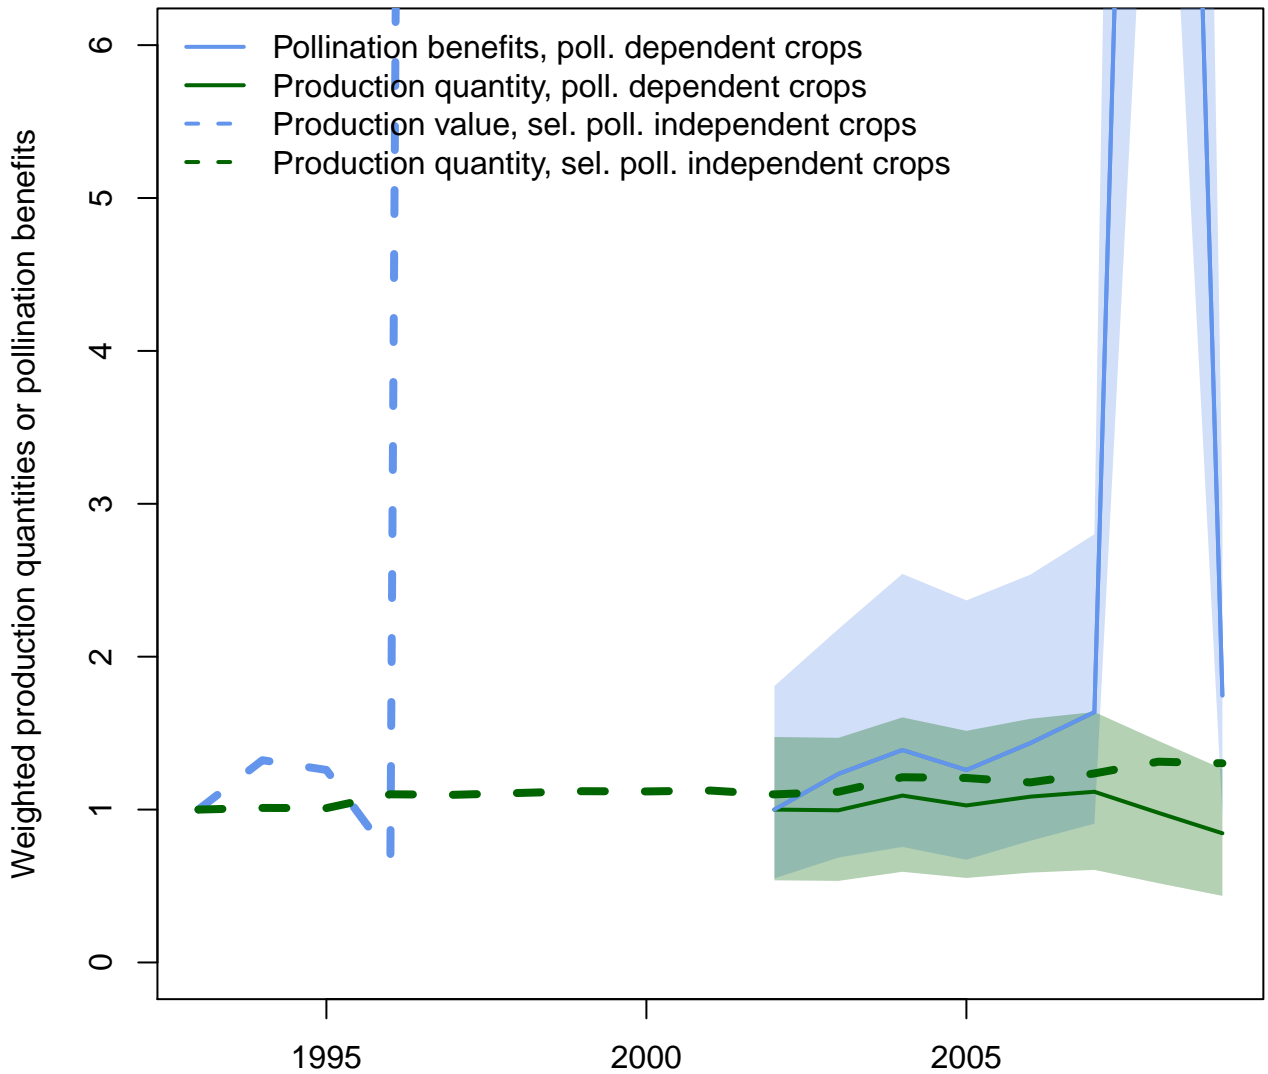

# Guinea-Bissau

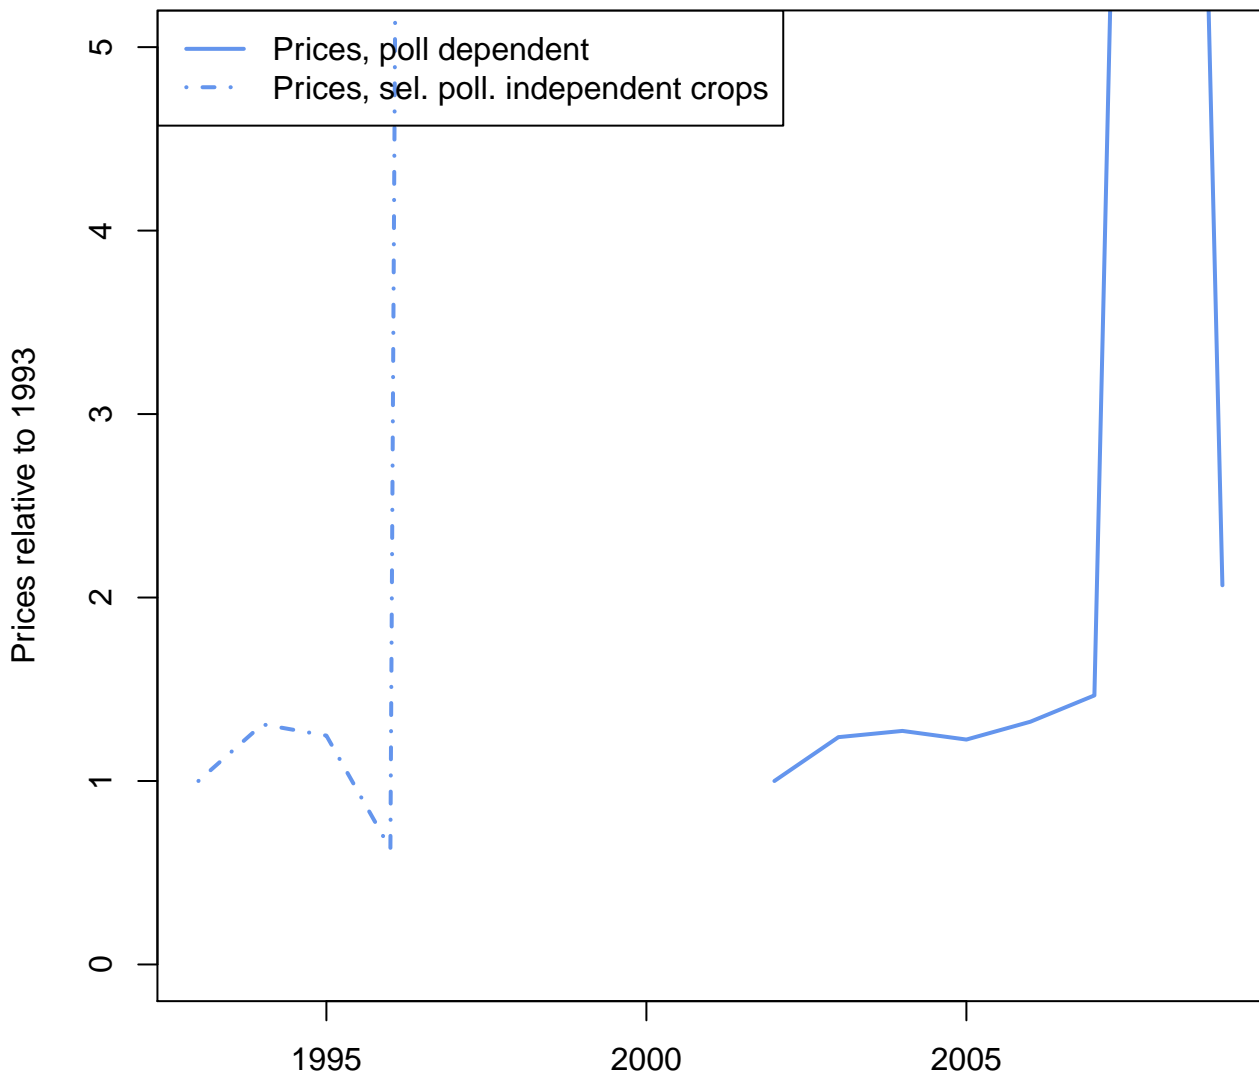



# Honduras

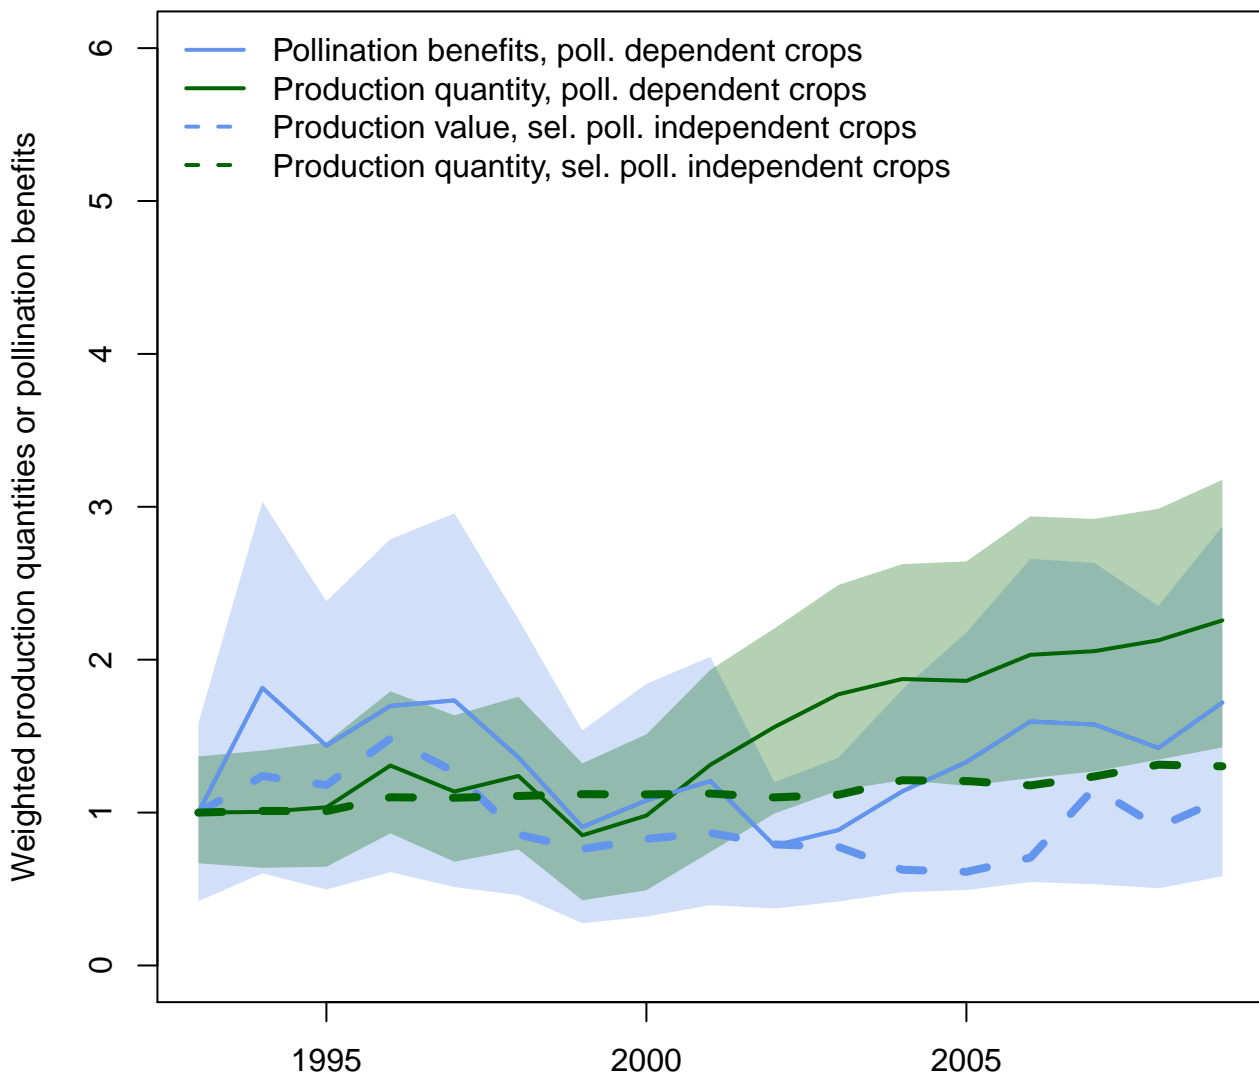

# Honduras

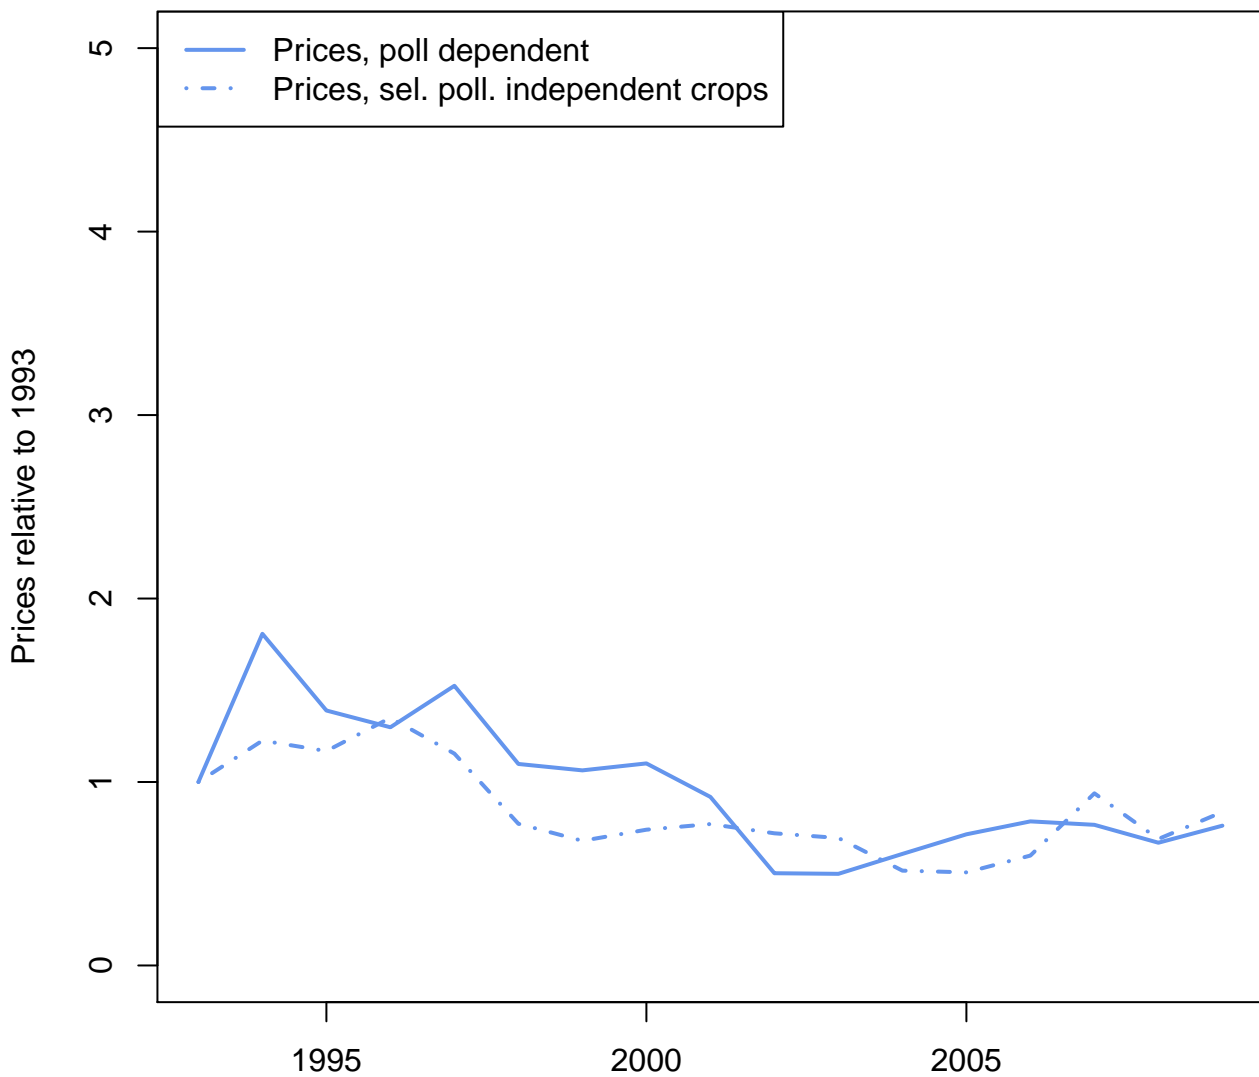

# Hungary

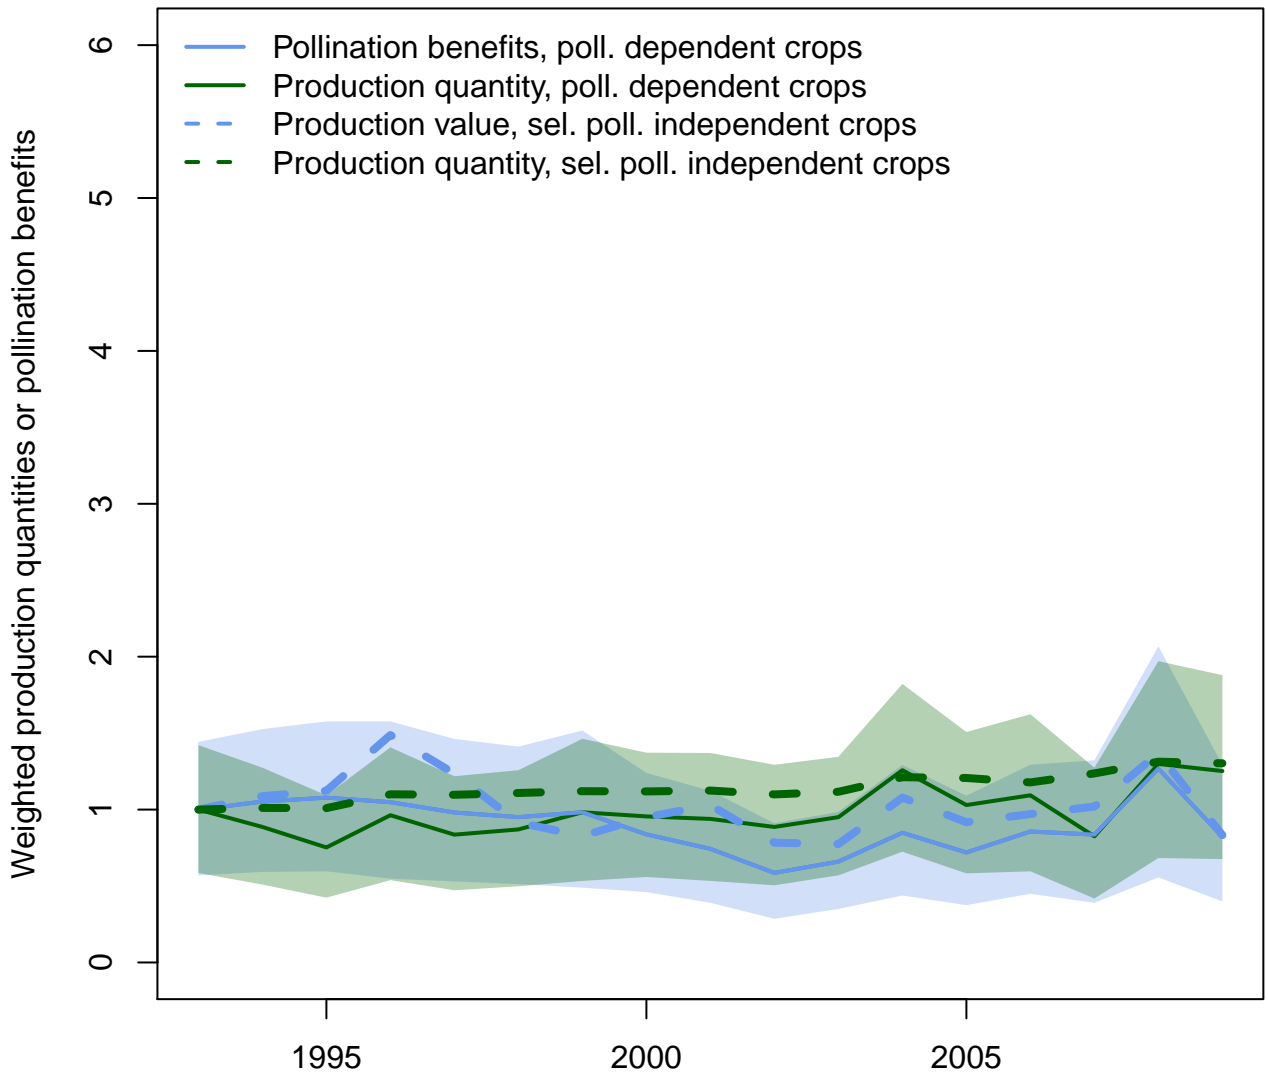

# Hungary

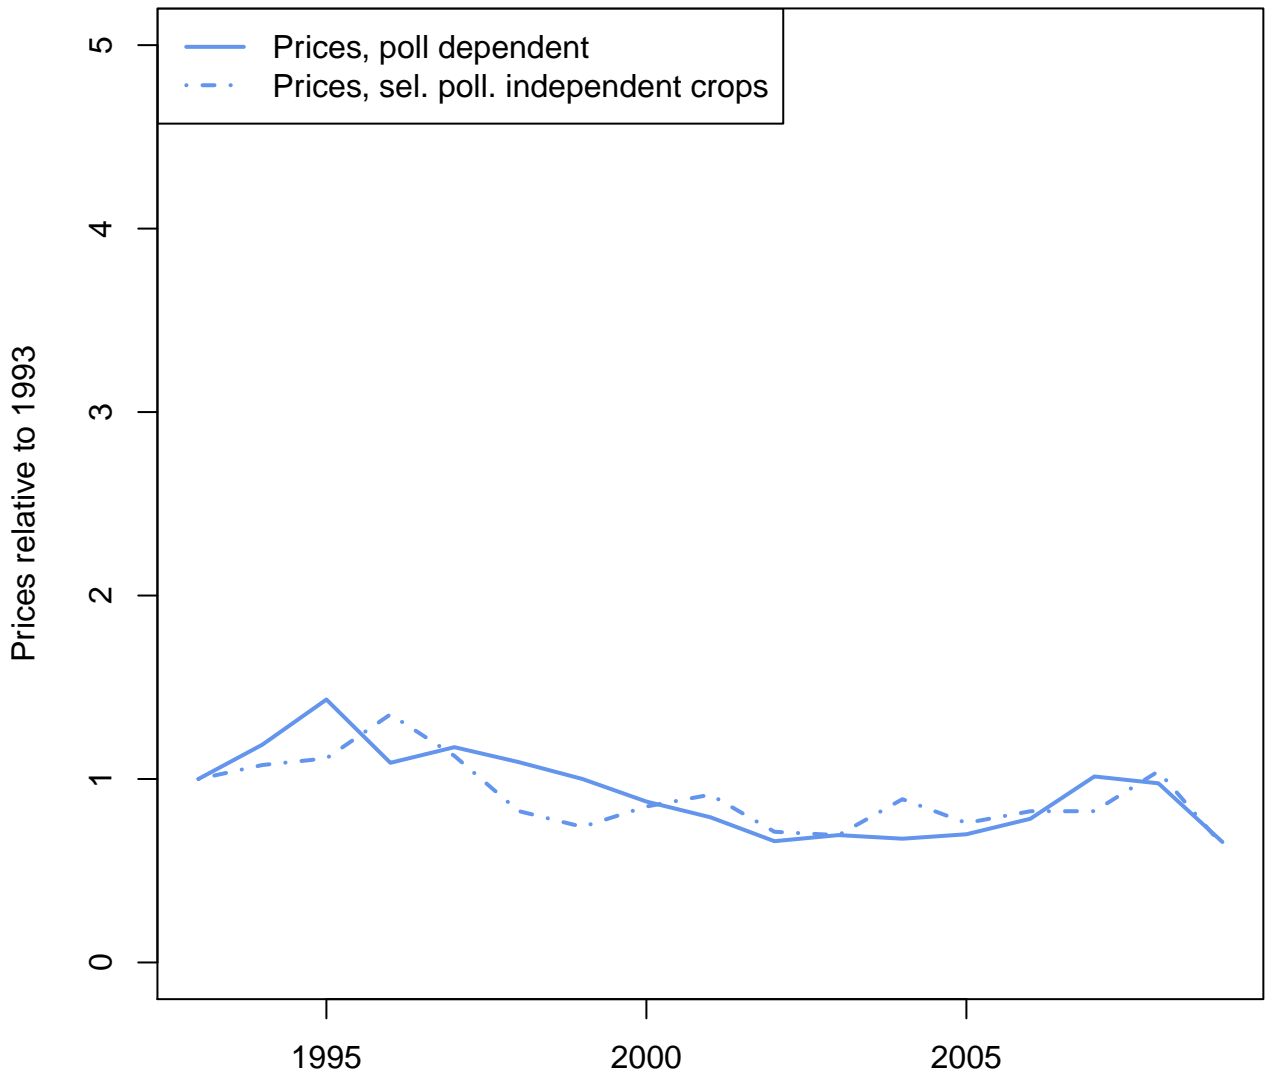

# Iceland

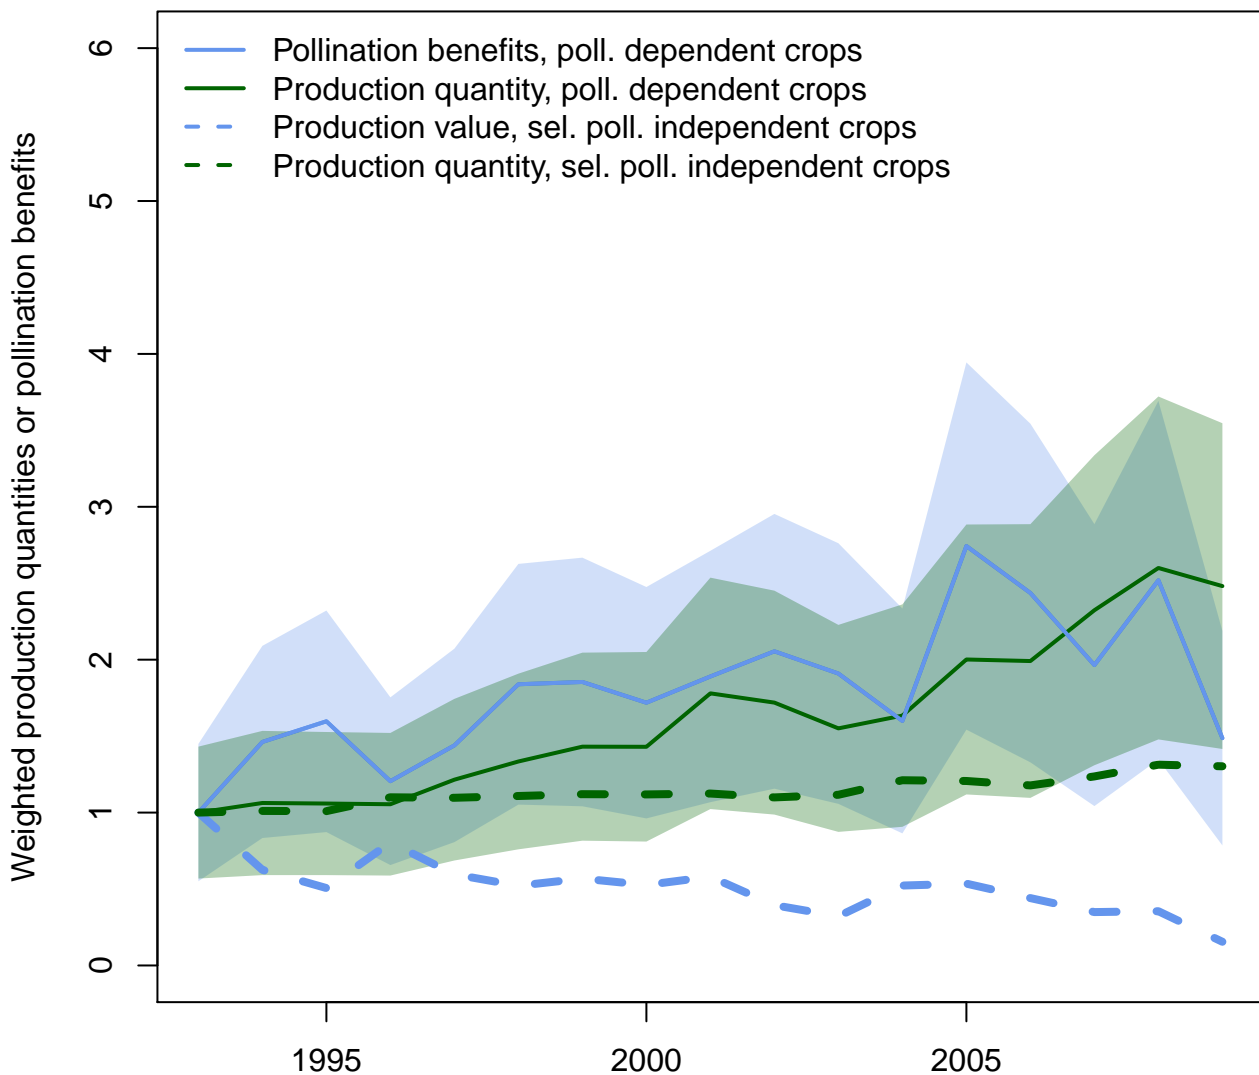

# Iceland

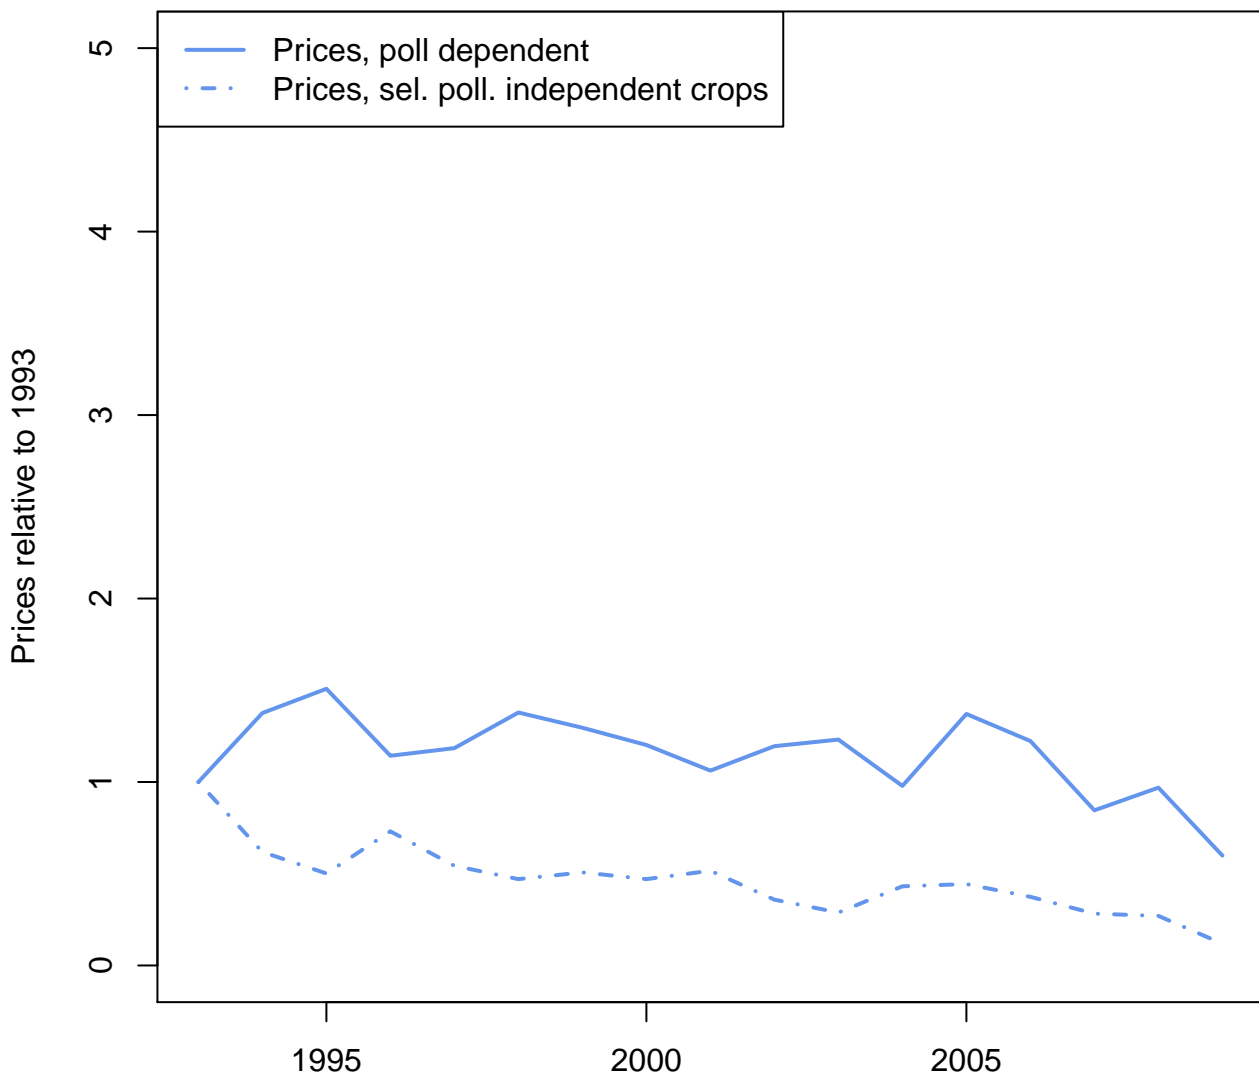

# India

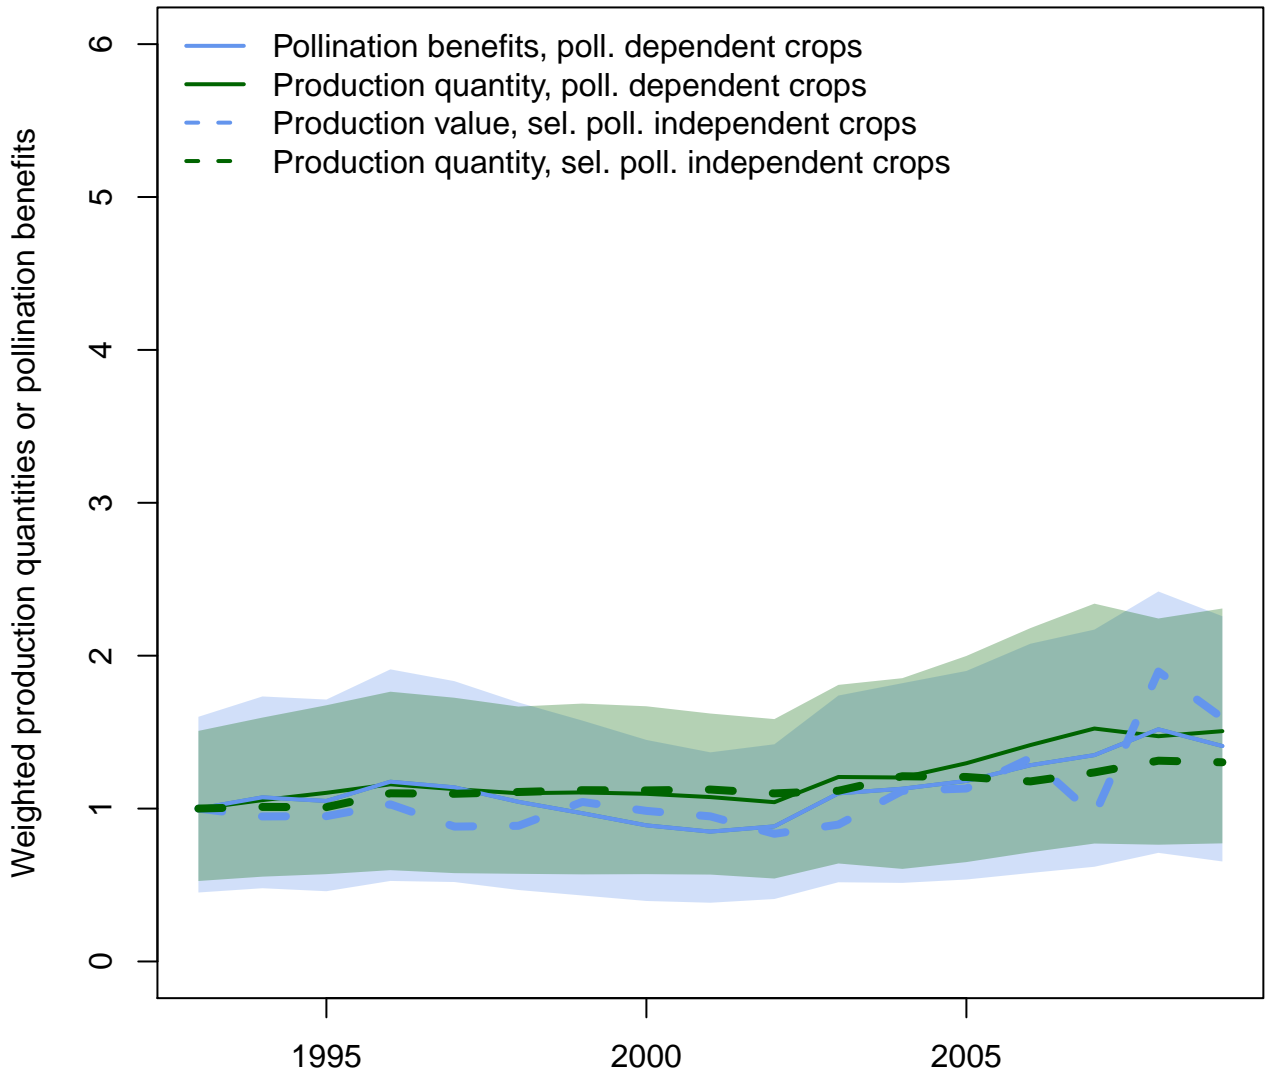

# India

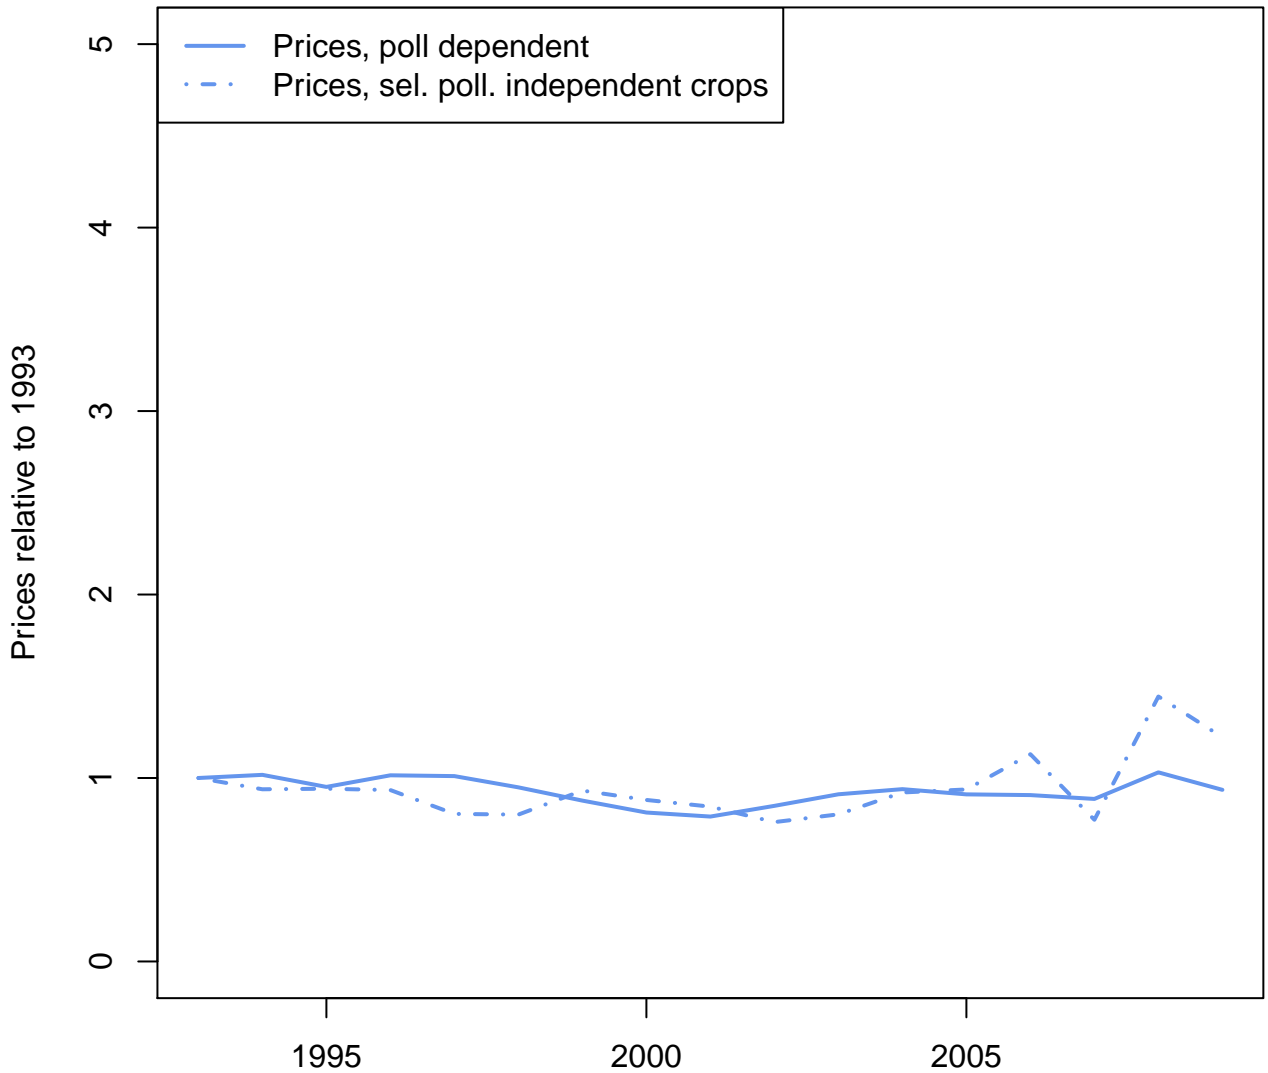



# Indonesia

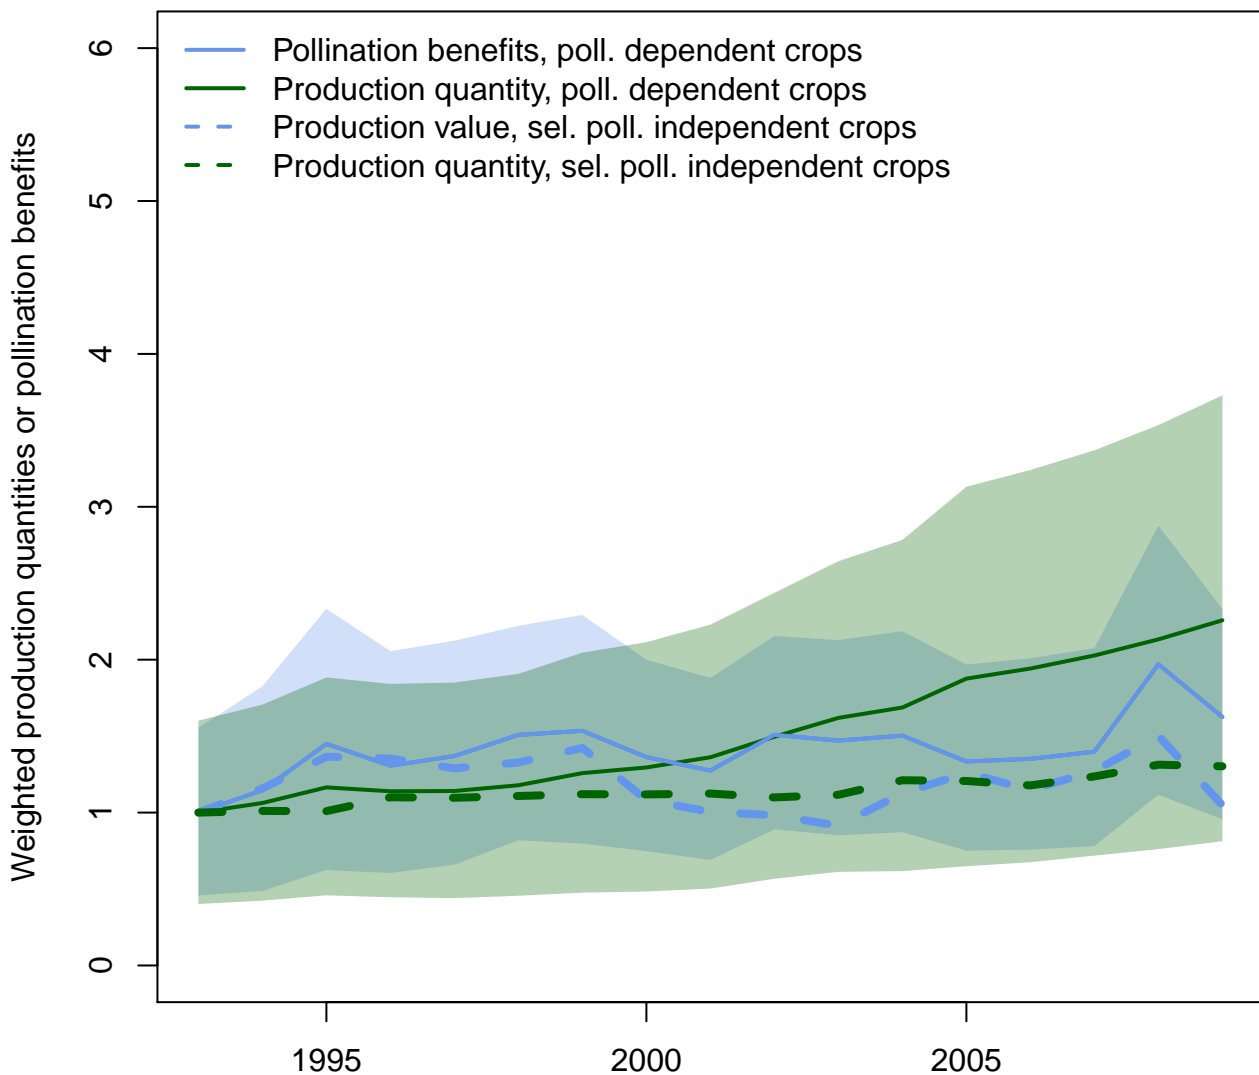

# Indonesia

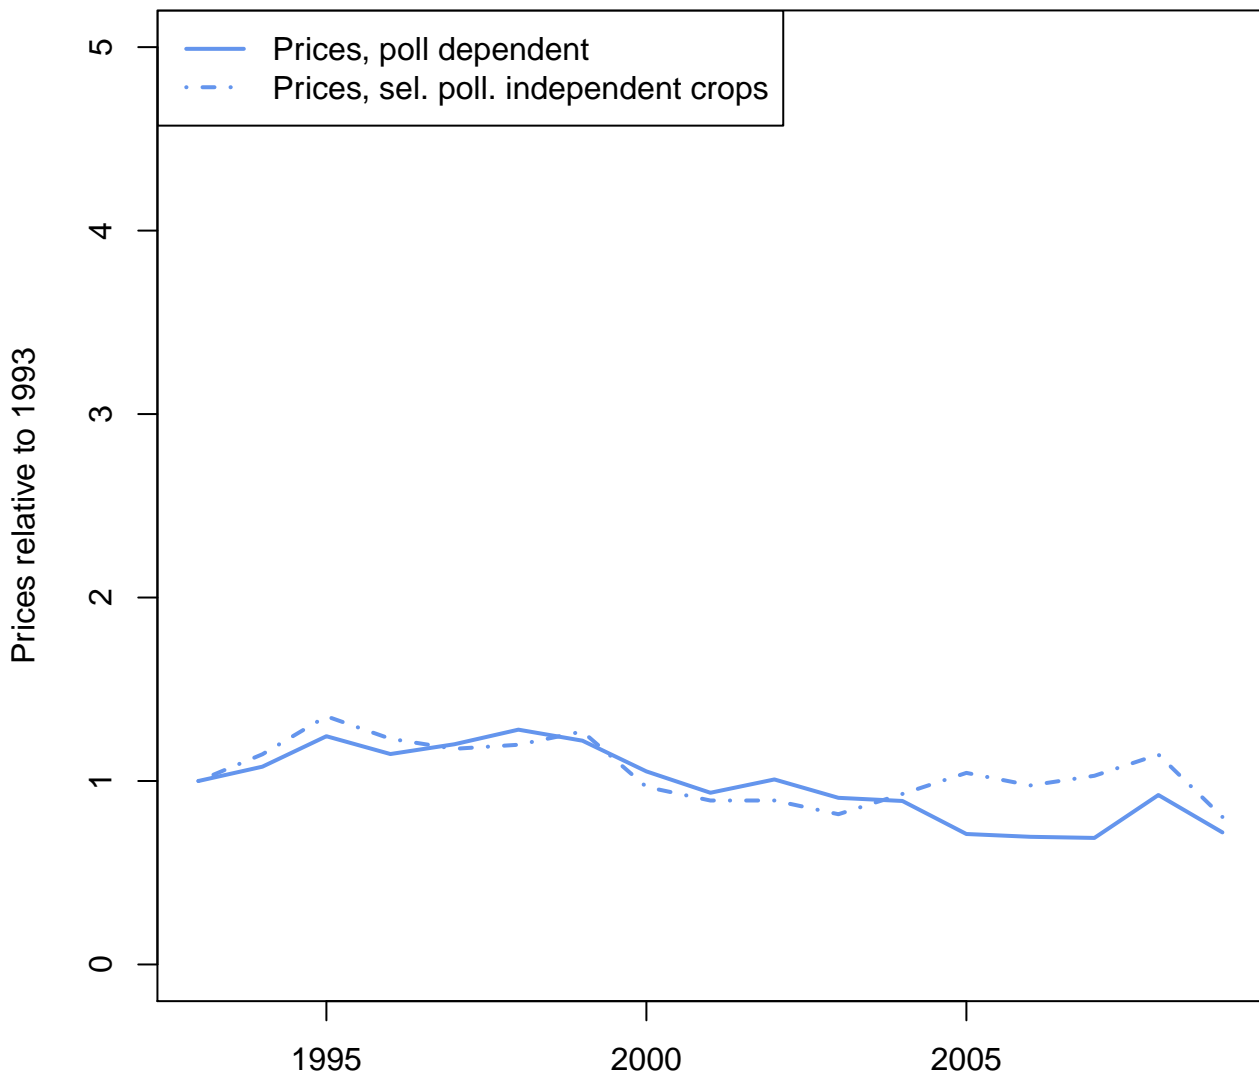

## Iran (Islamic Republic of)

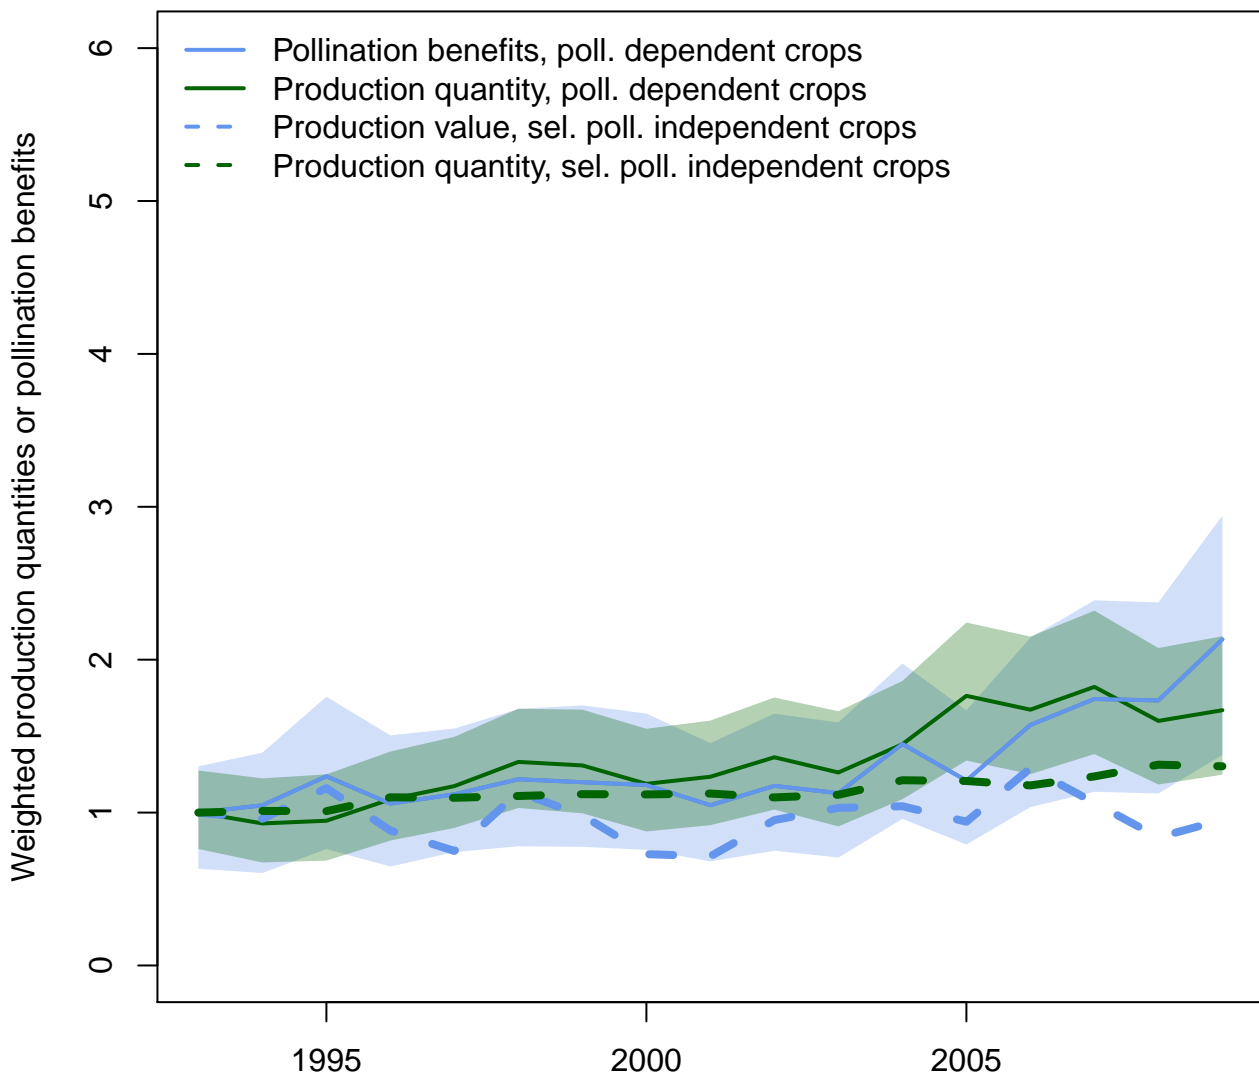

## Iran (Islamic Republic of)

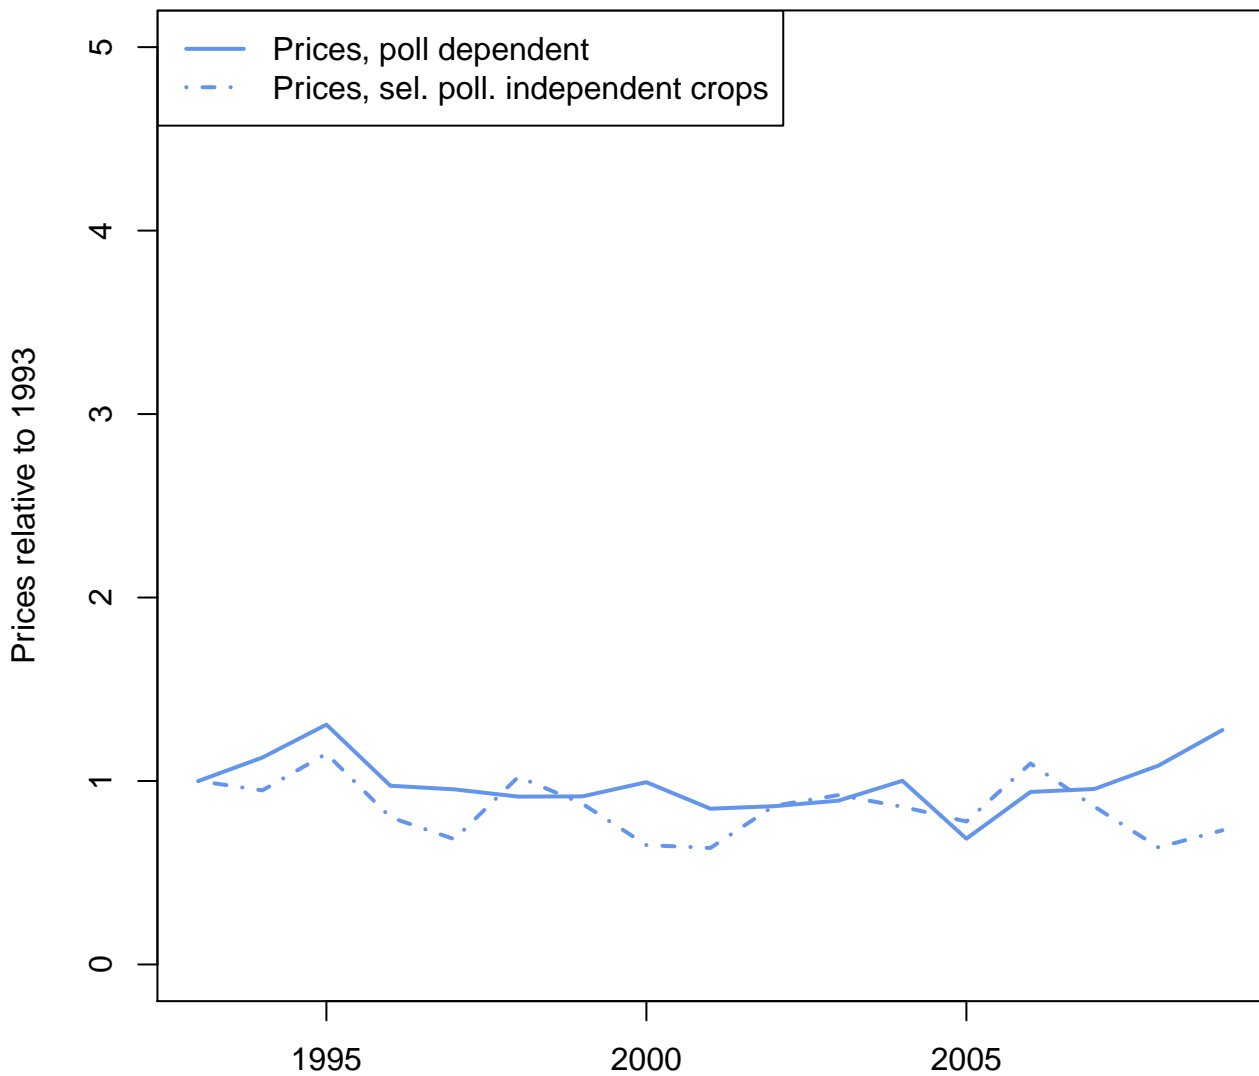

## Ireland

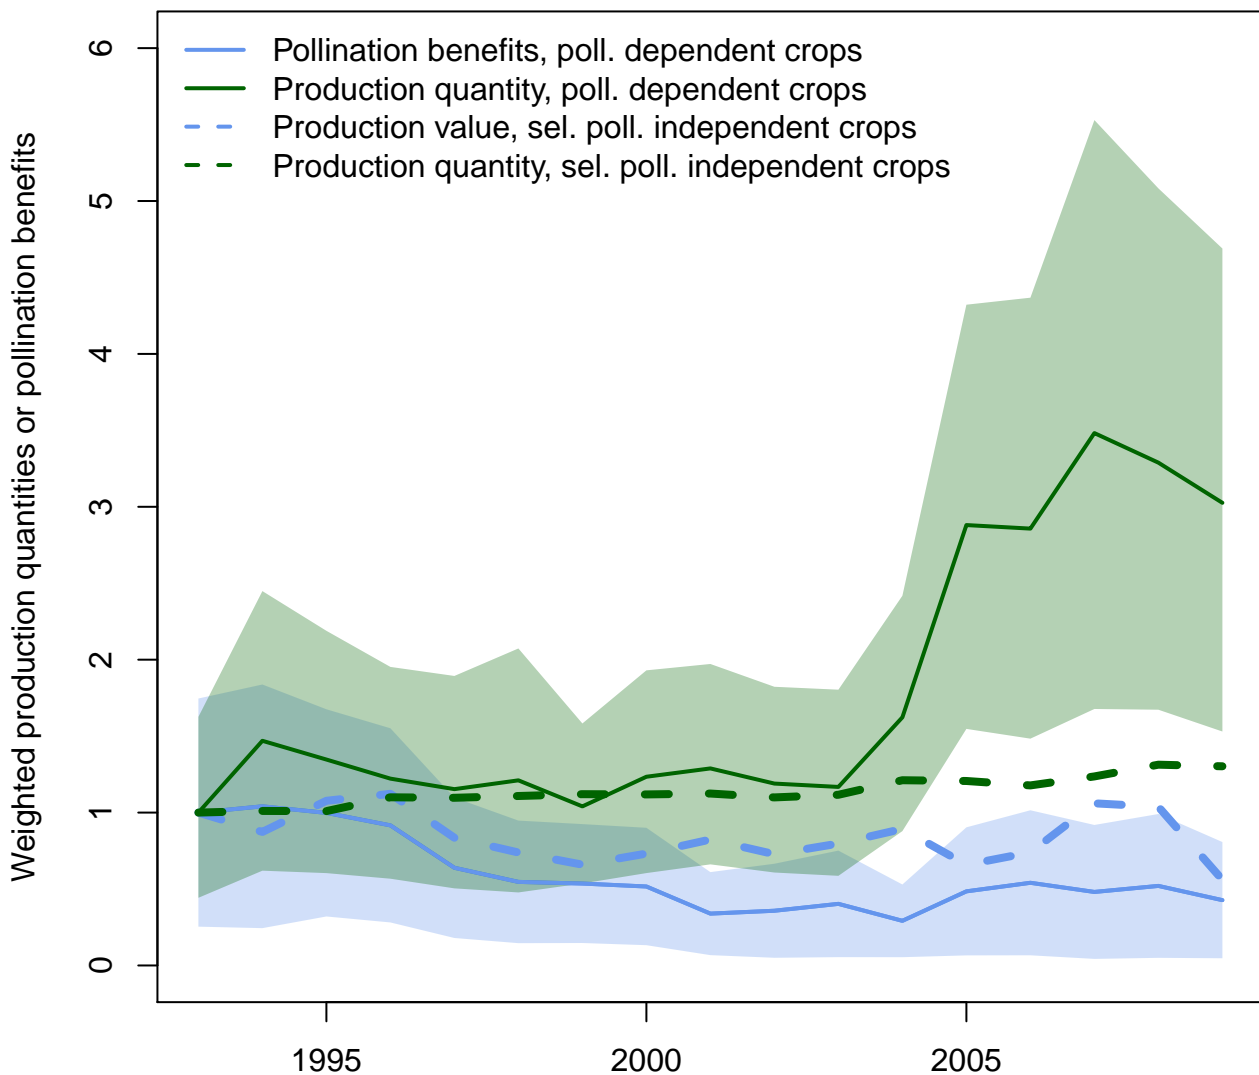

# Ireland

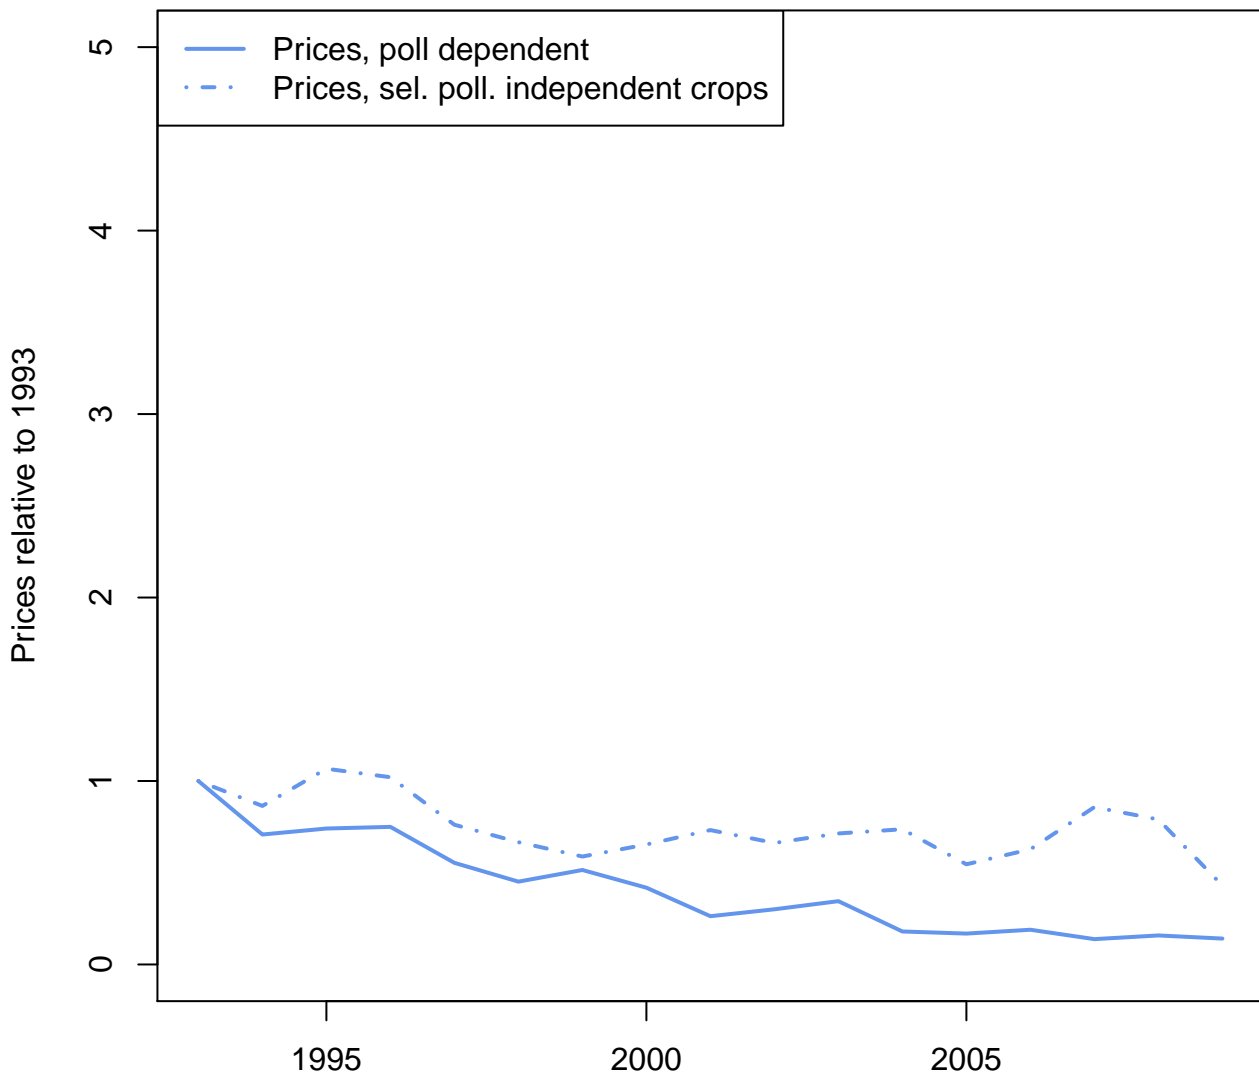

# Israel

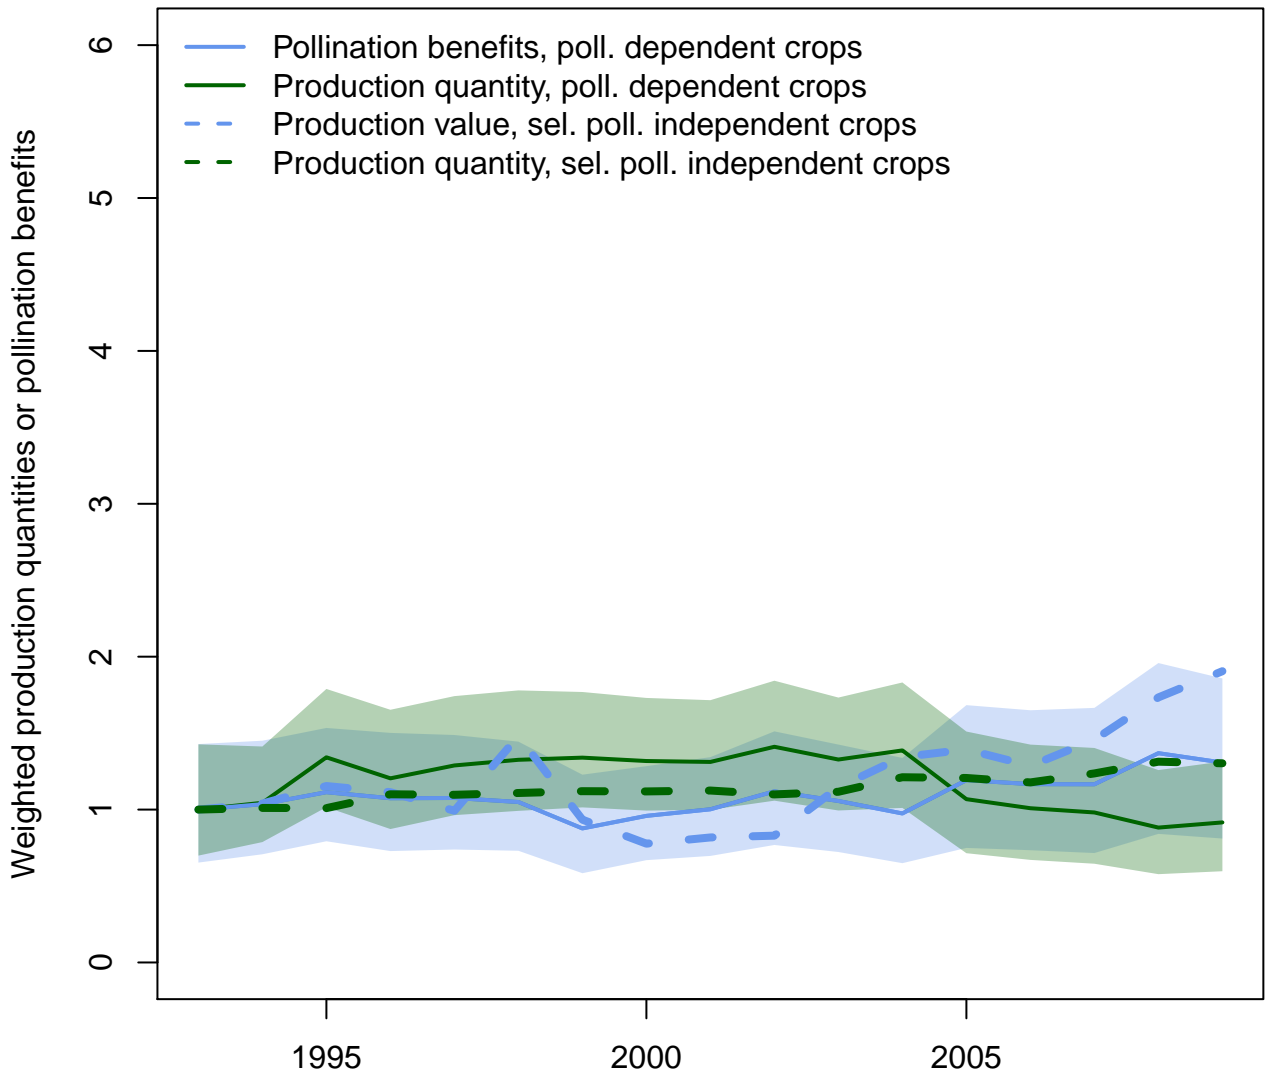

# Israel

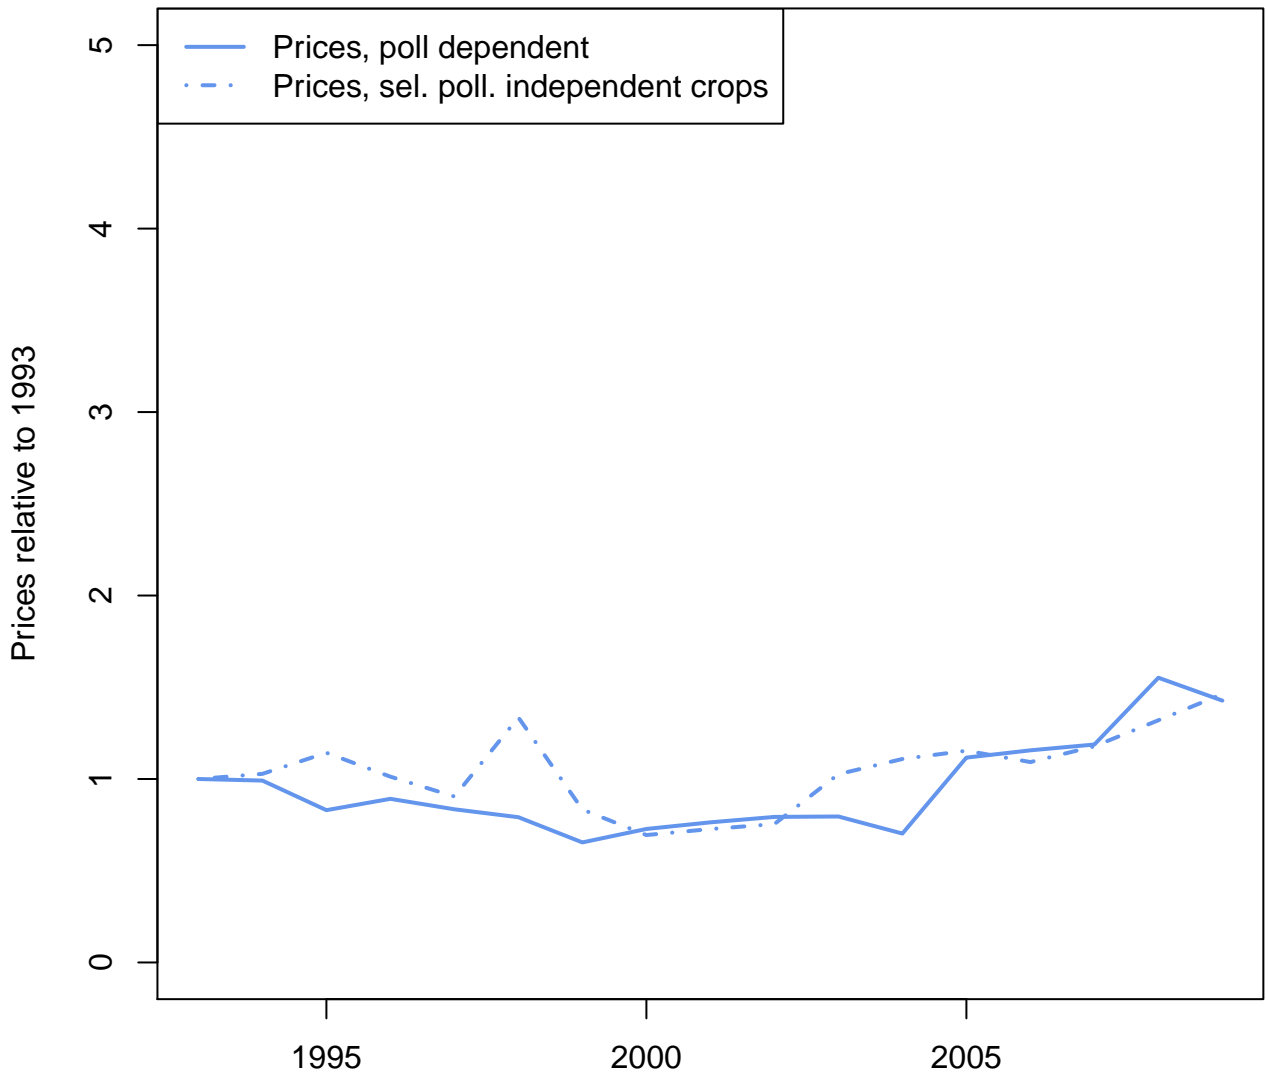



# Italy

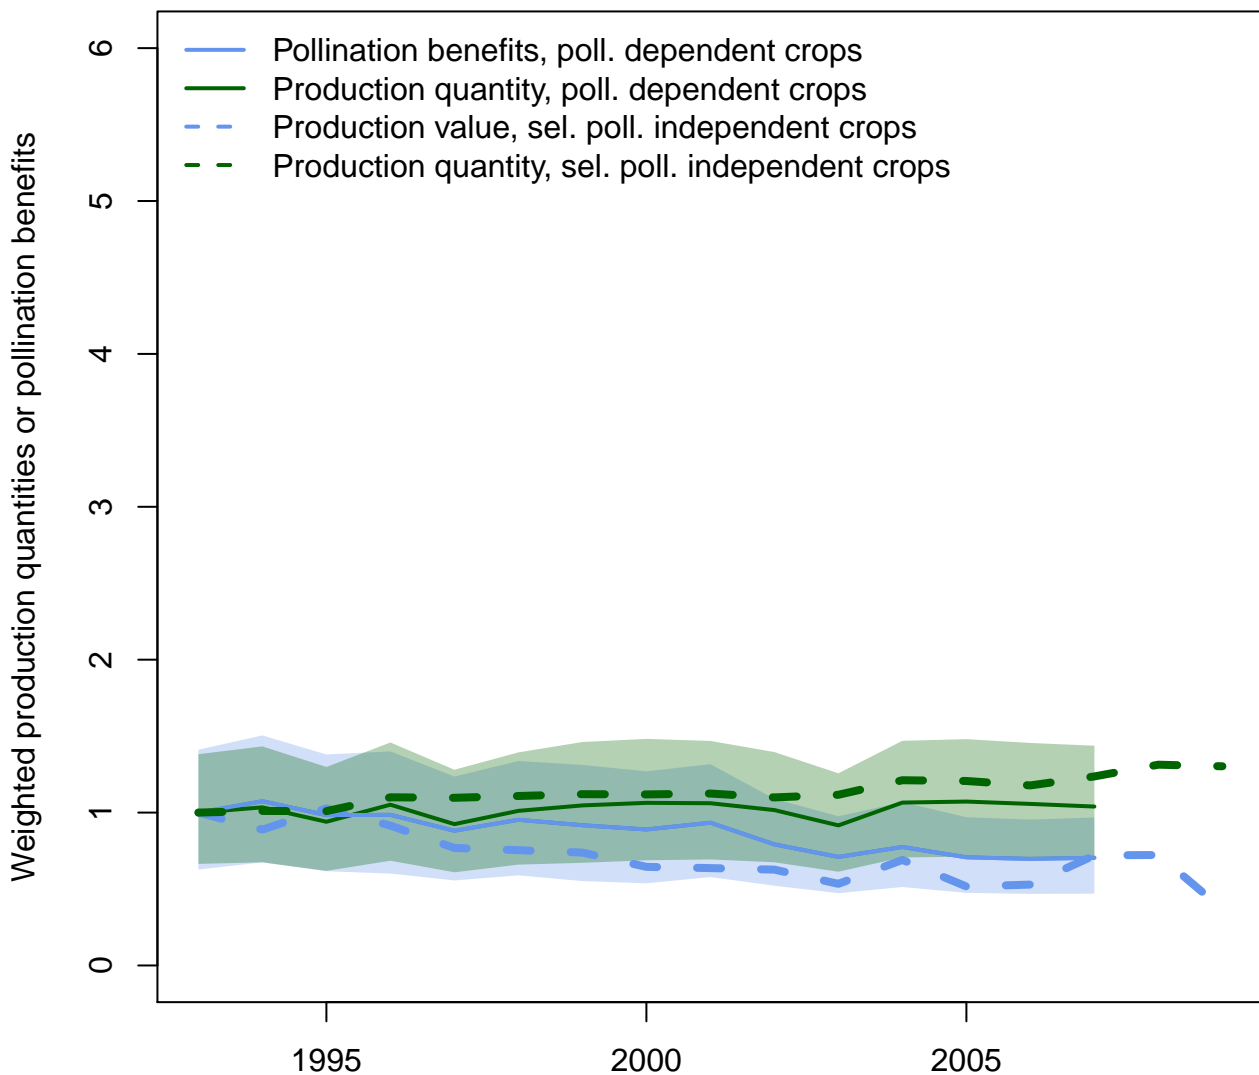

# Italy

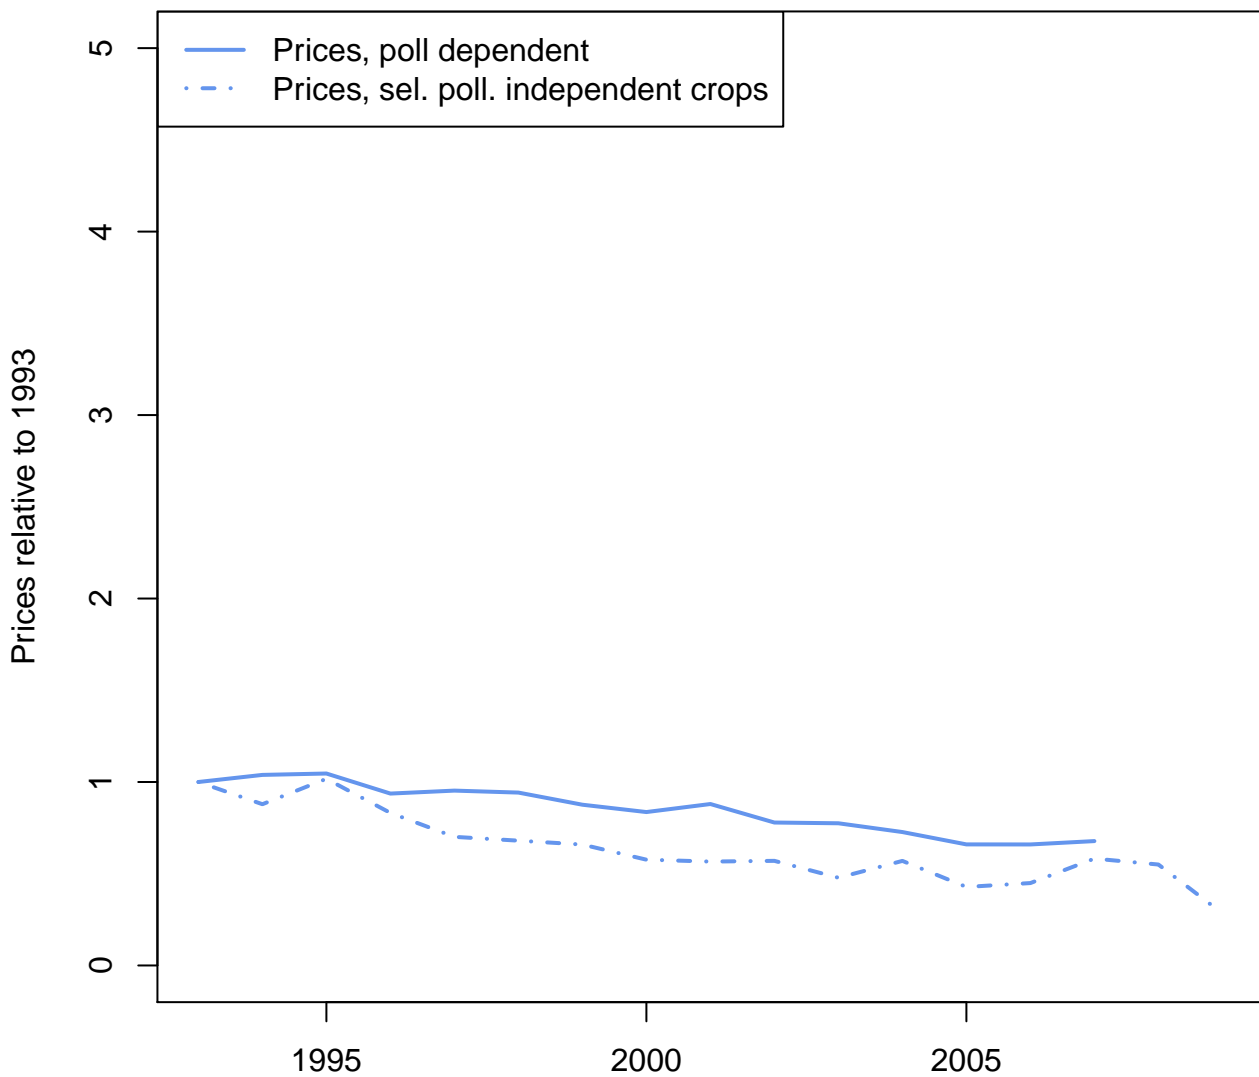

# Jamaica

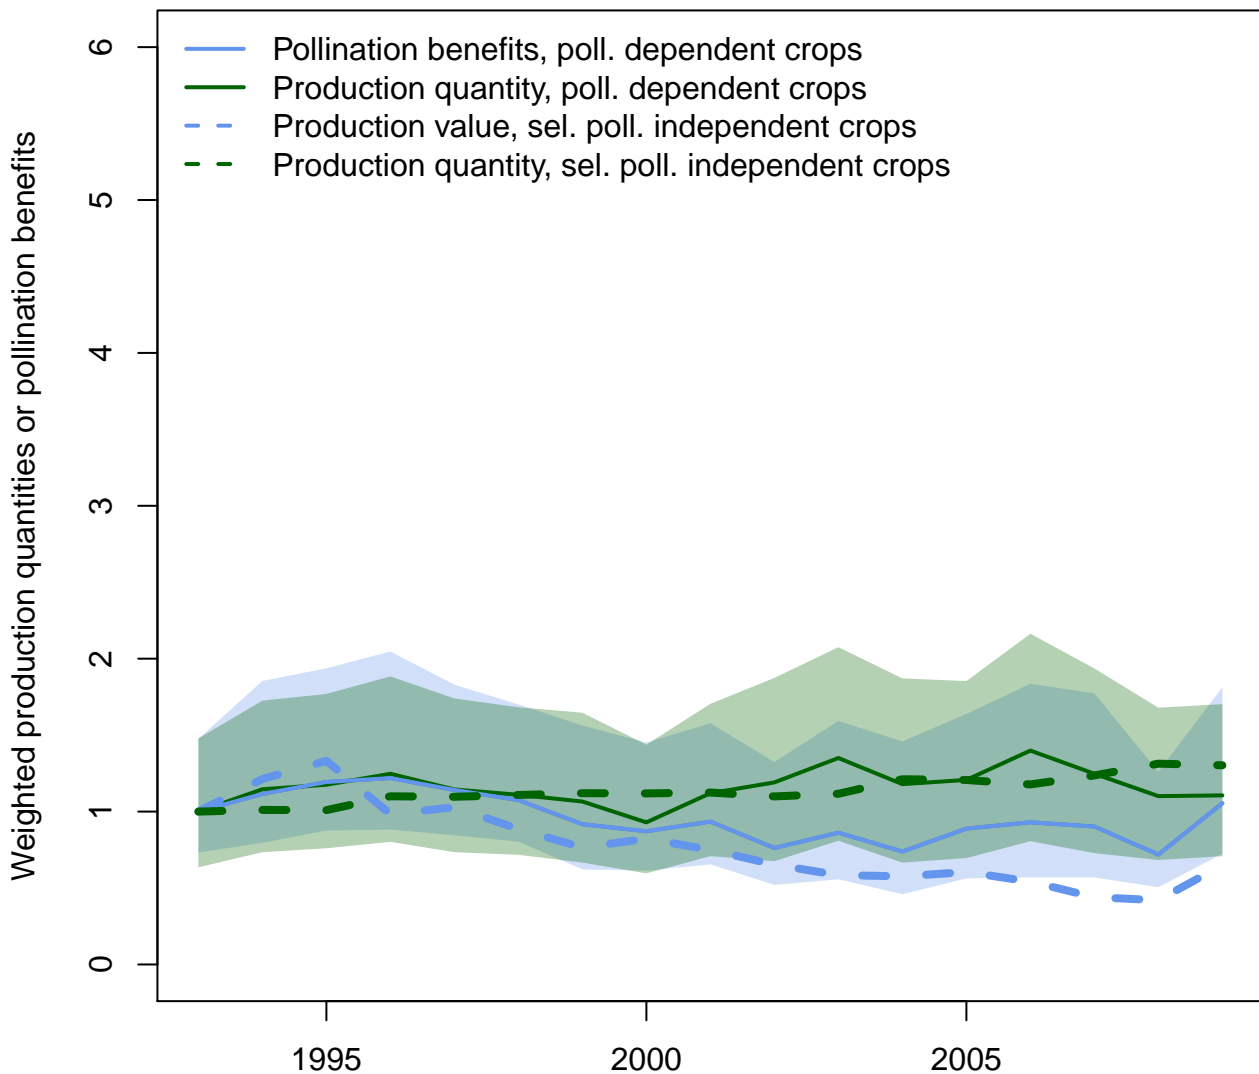

# Jamaica

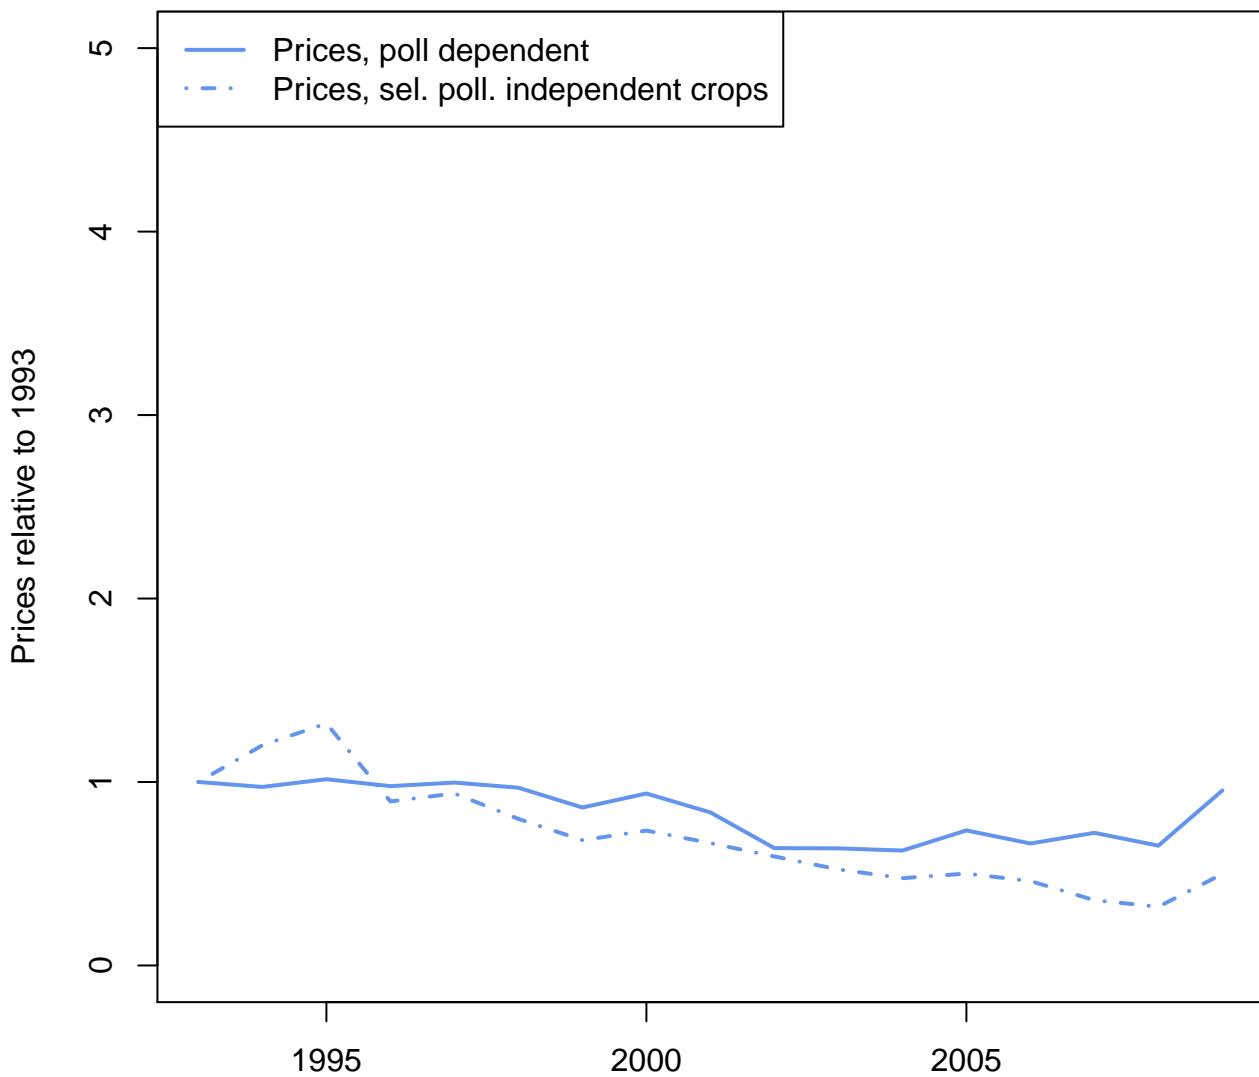

# Japan

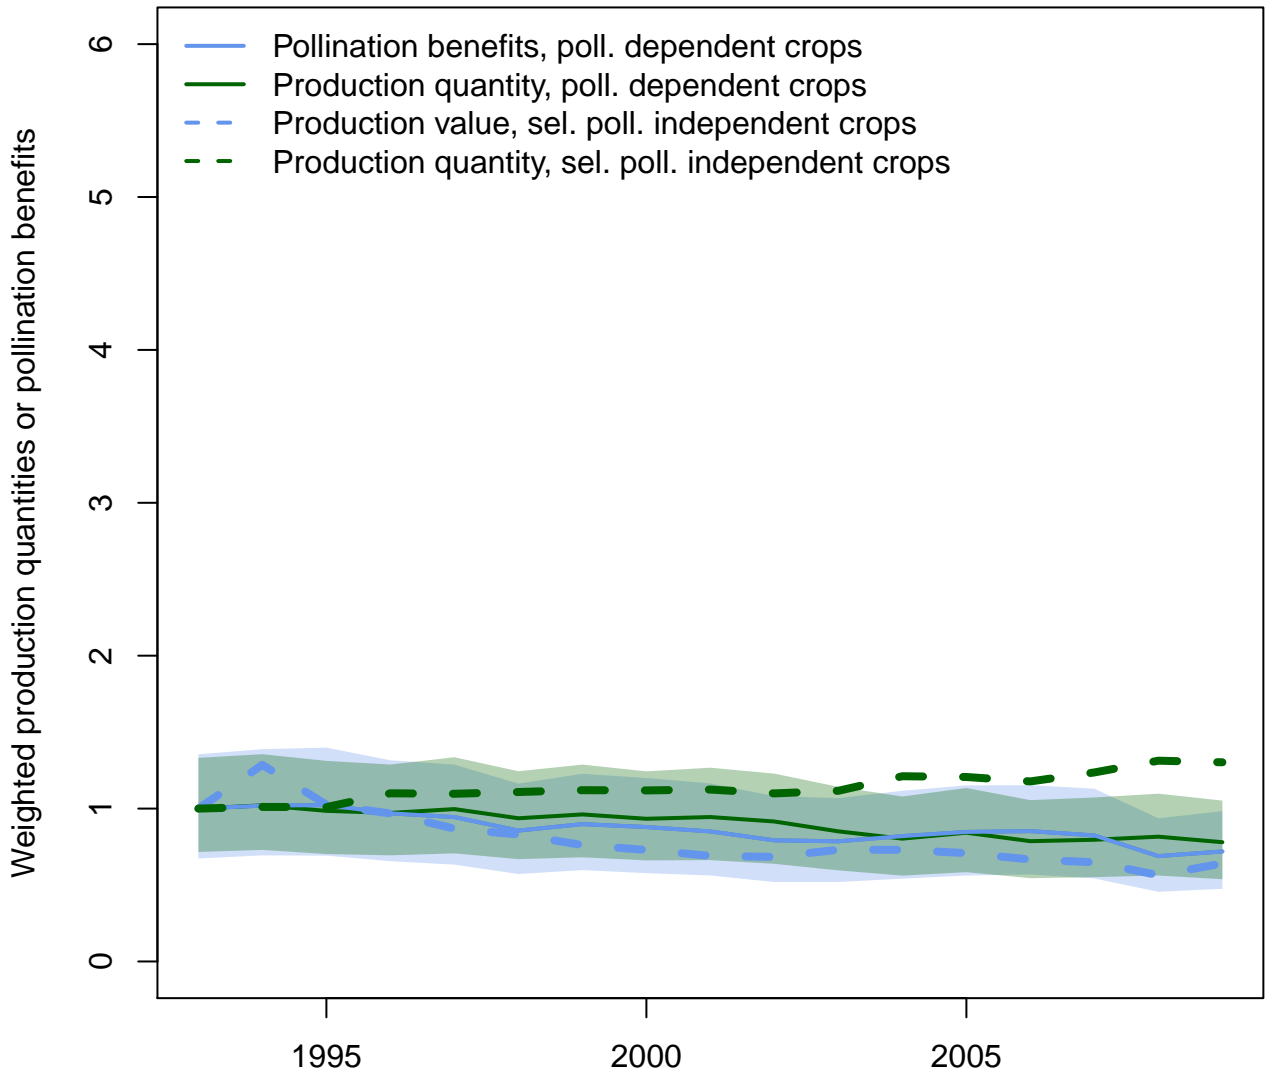

# Japan

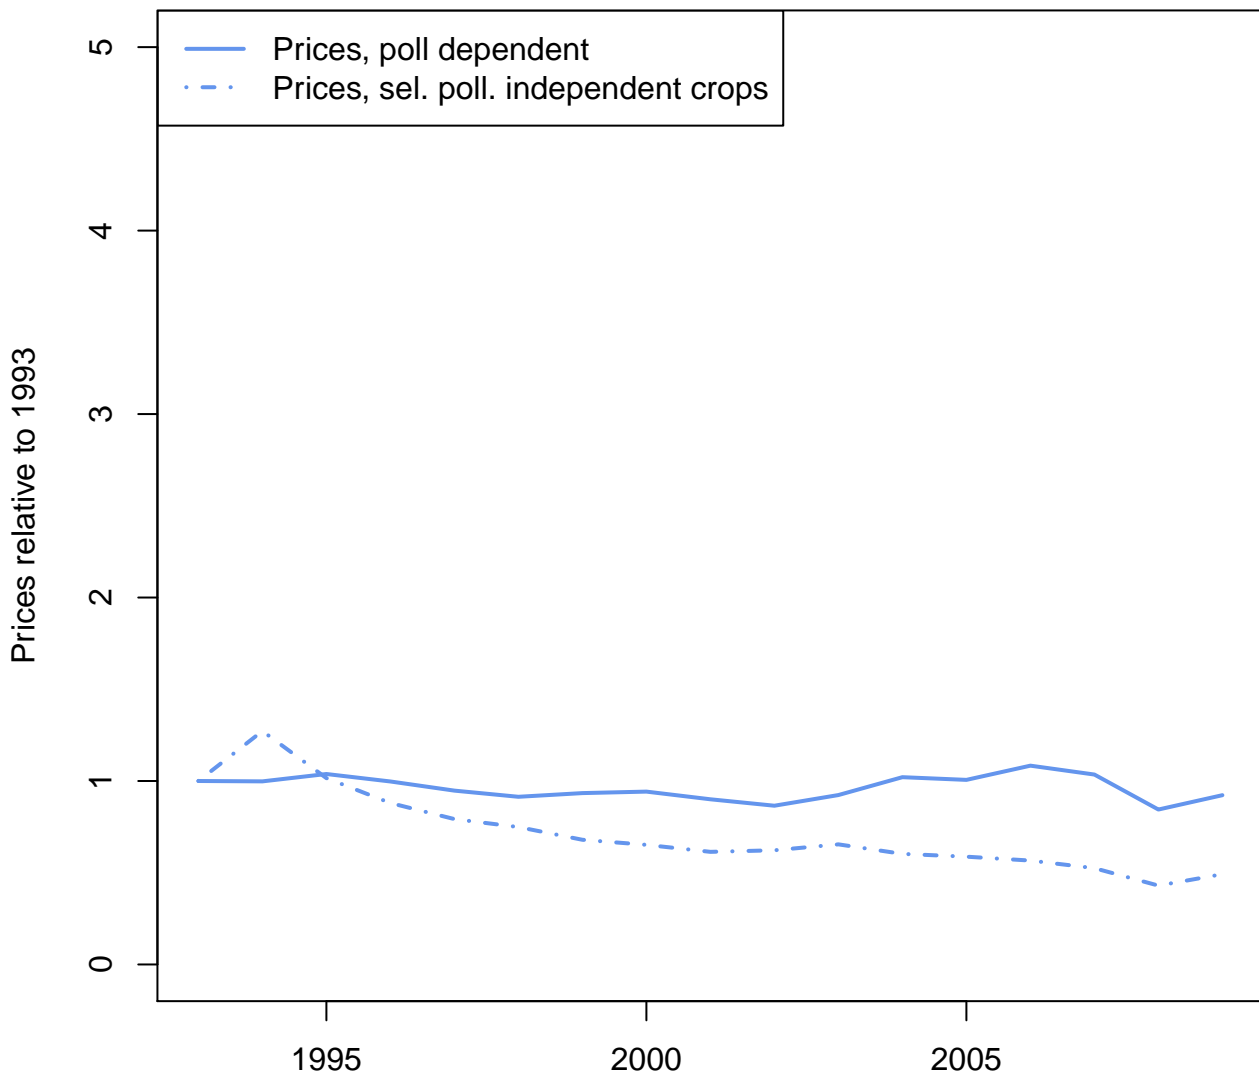

# Jordan

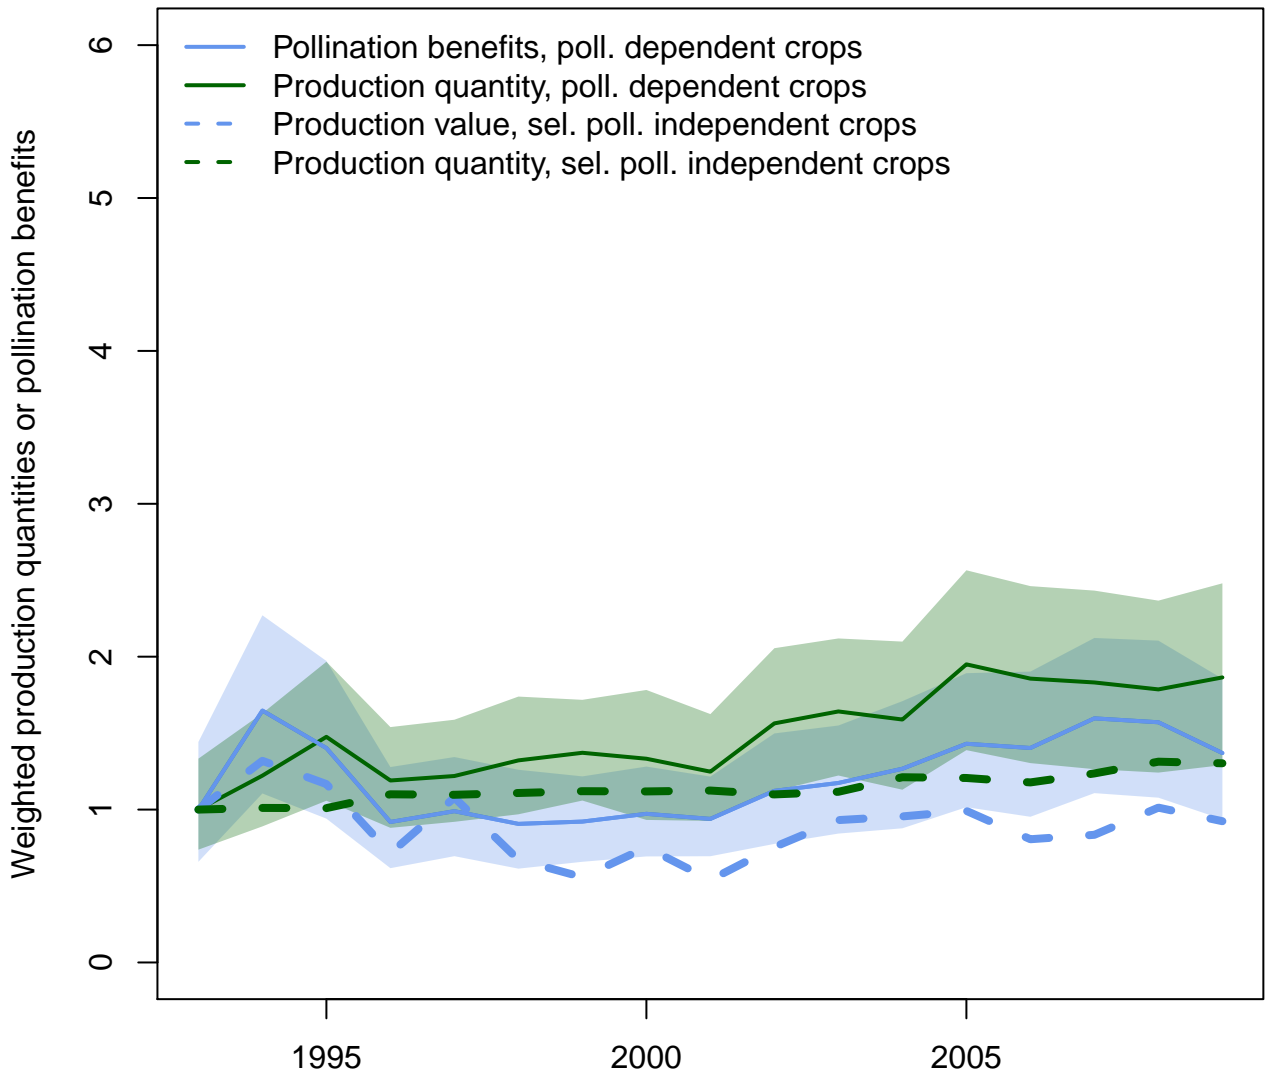

## Jordan

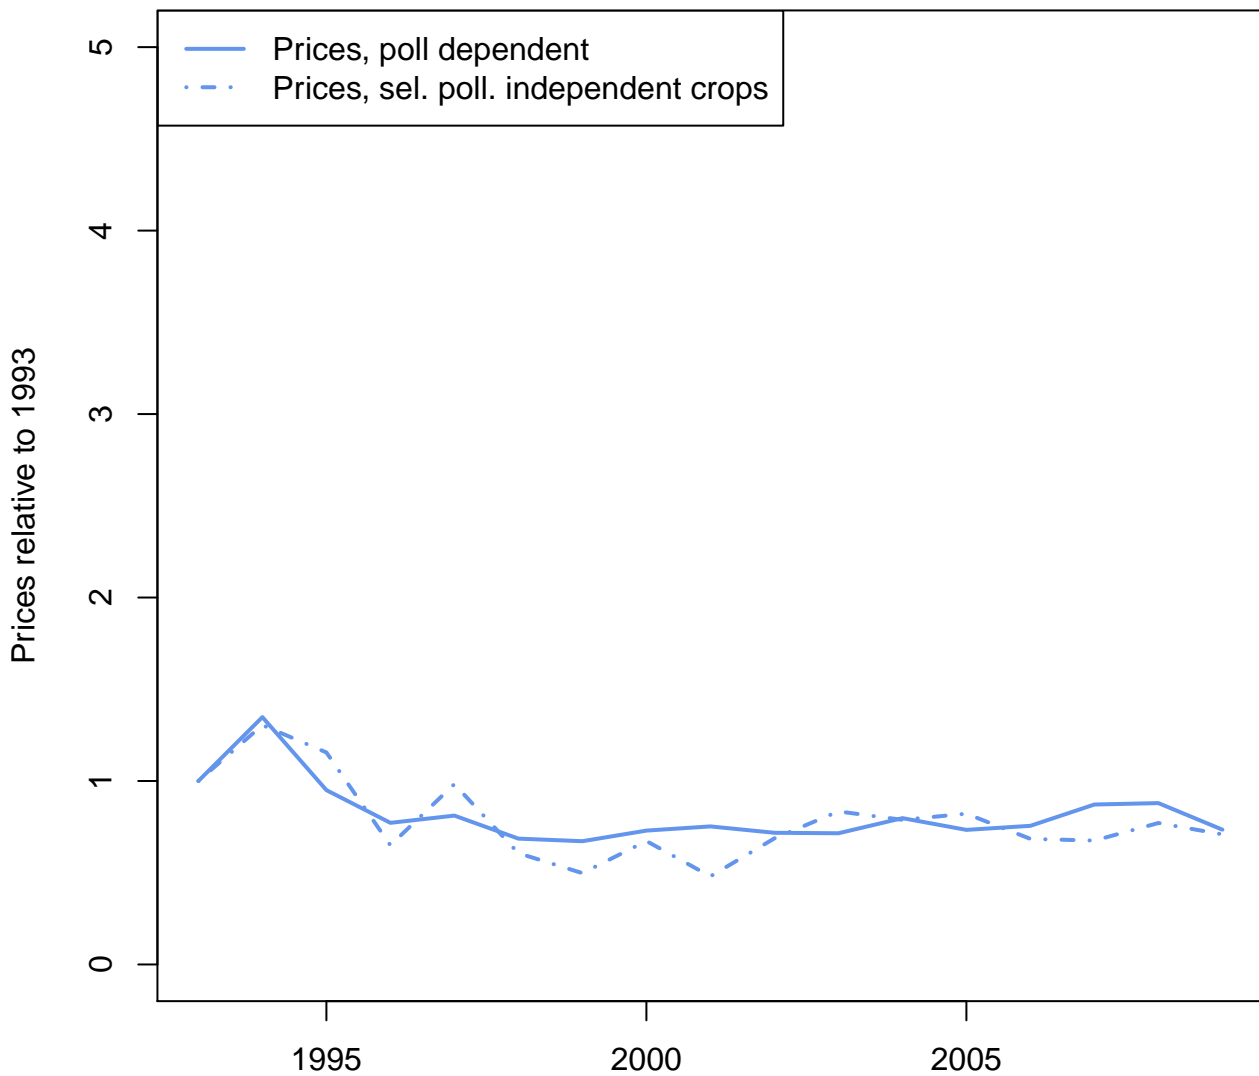



# Kazakhstan

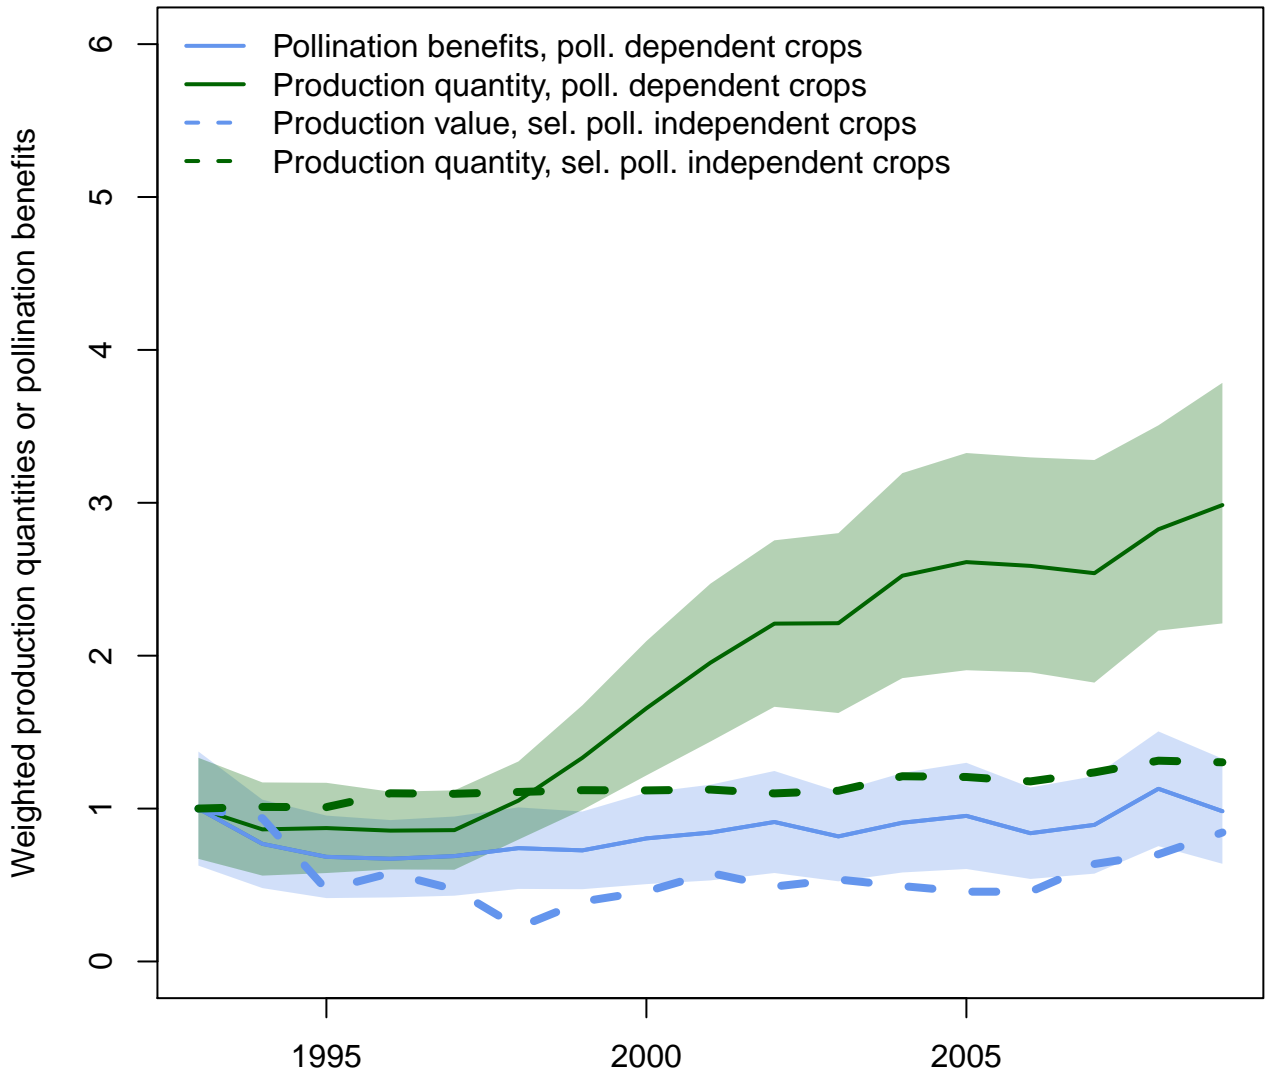

# Kazakhstan

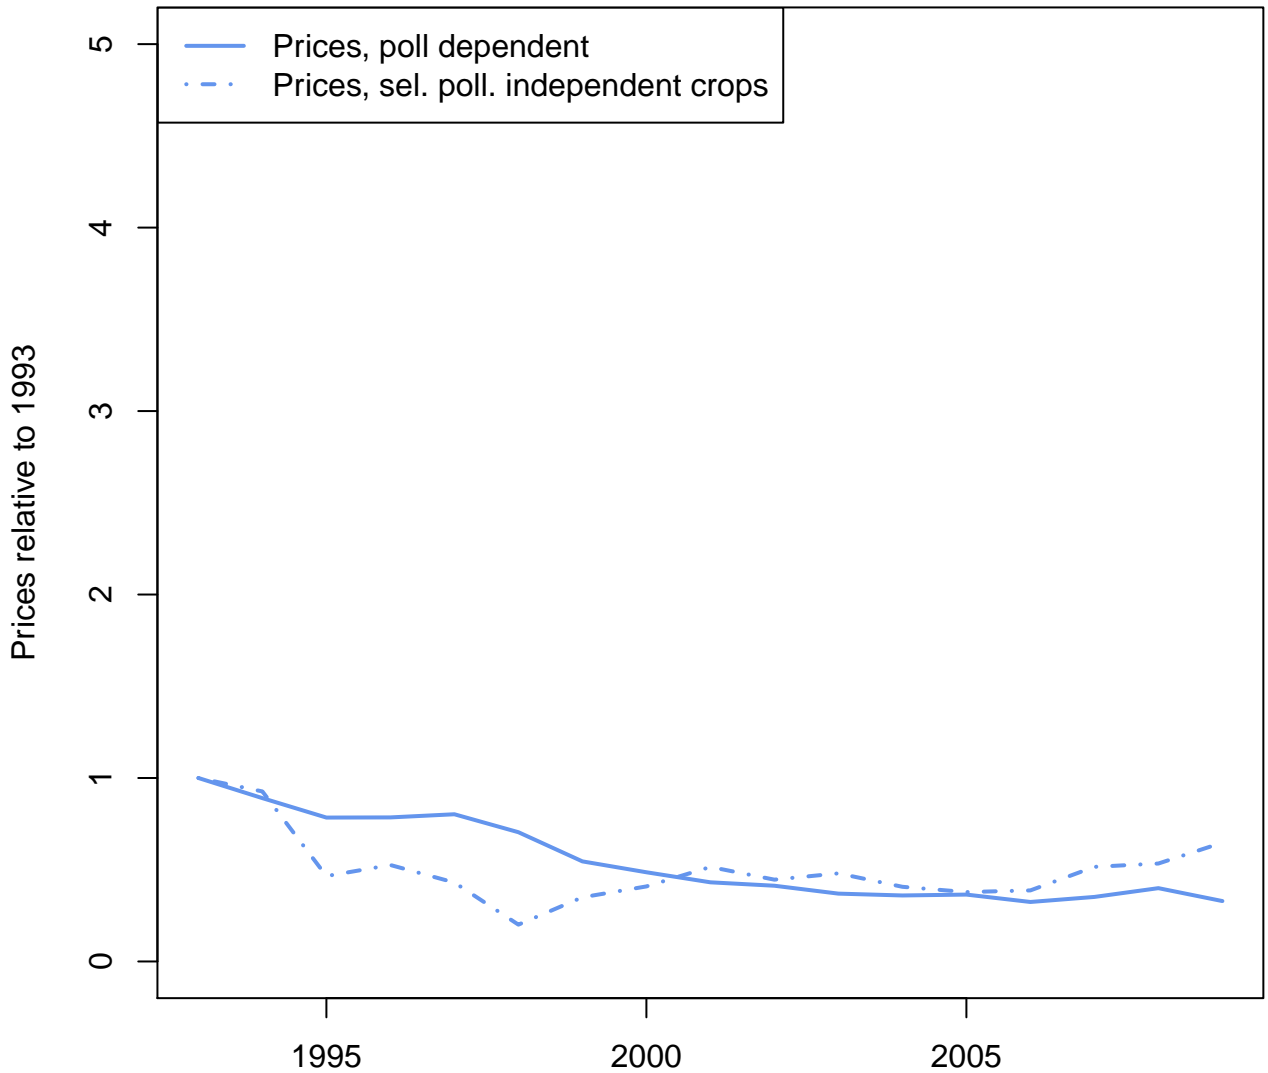

# Kenya

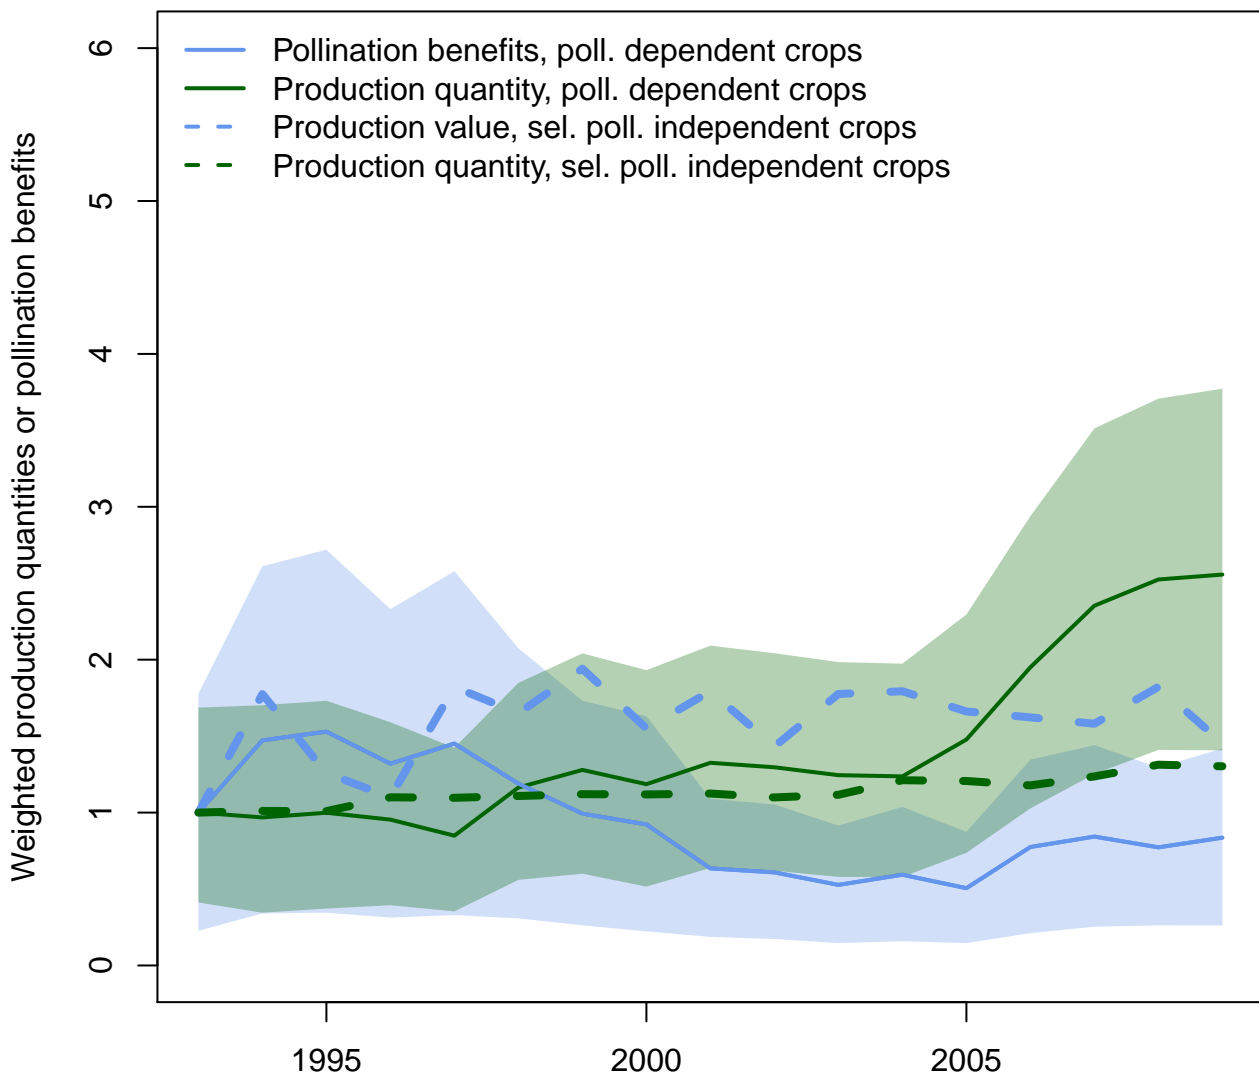

# Kenya

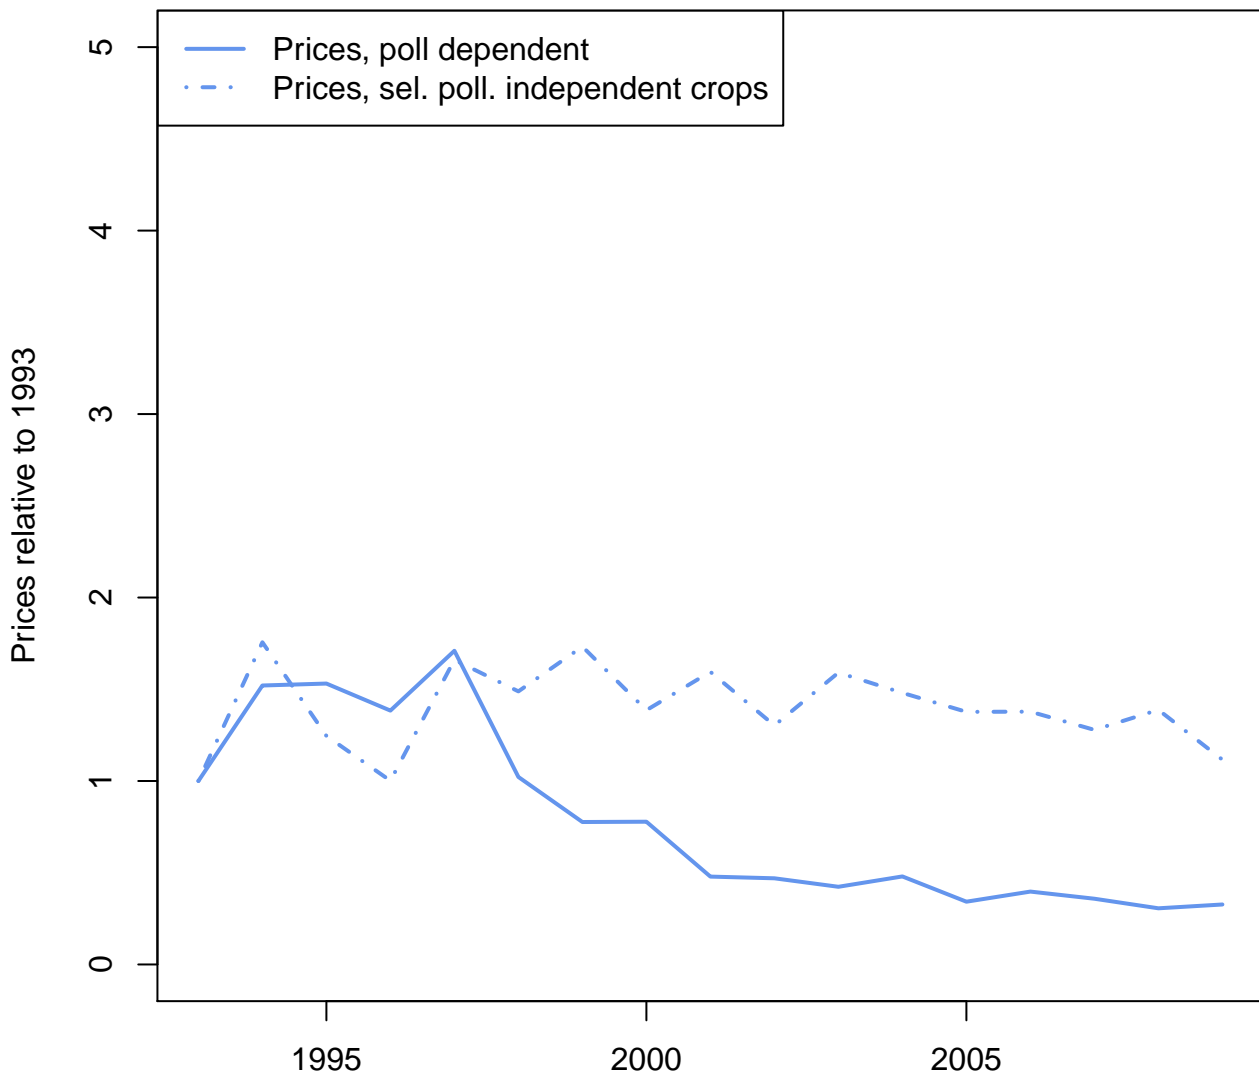

# Kyrgyzstan

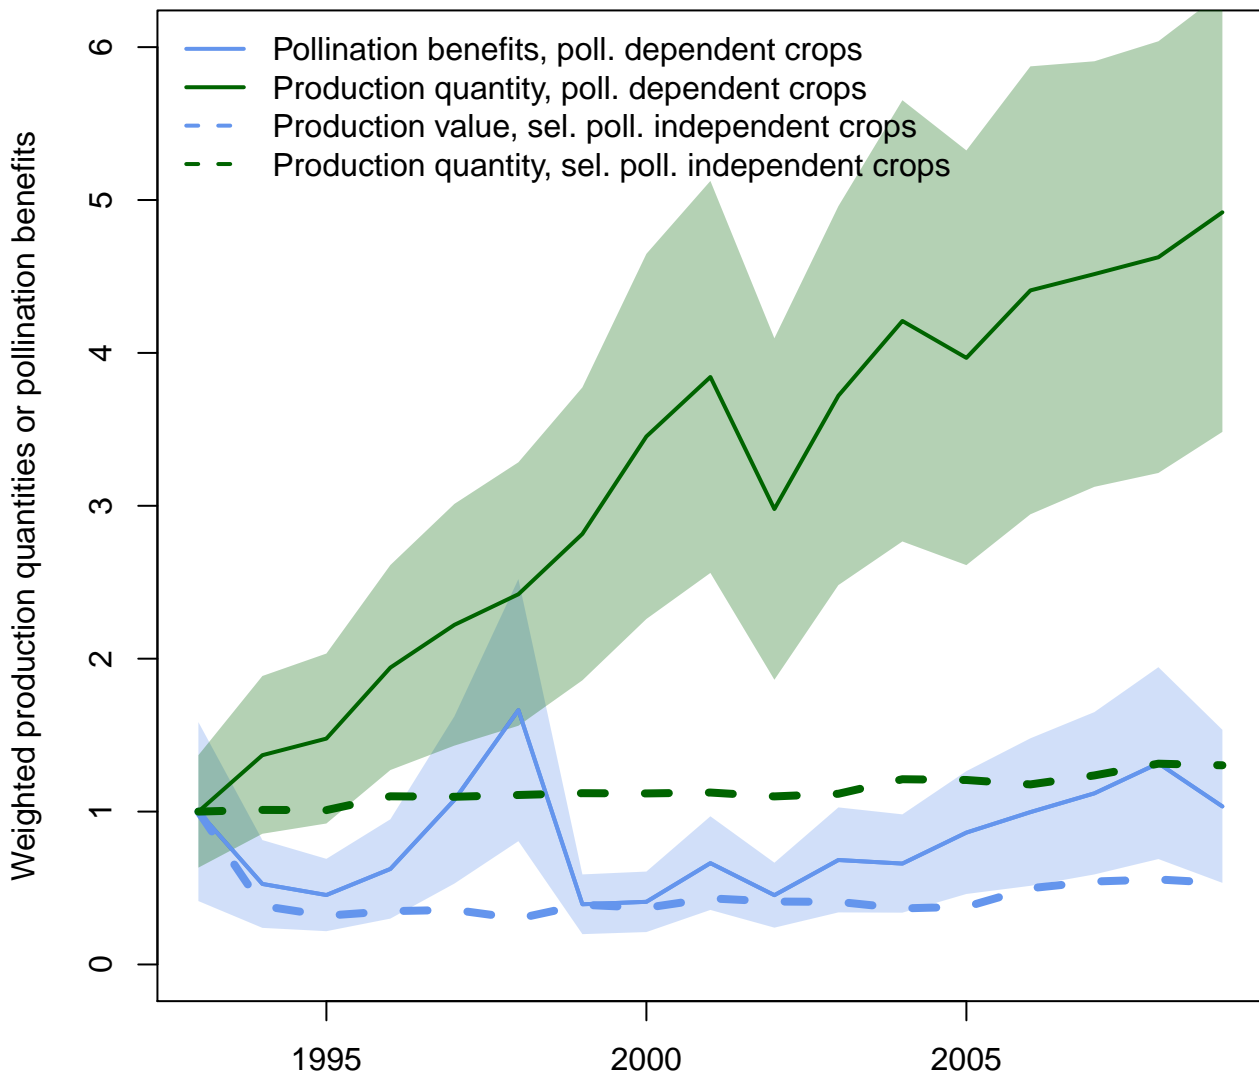

# Kyrgyzstan

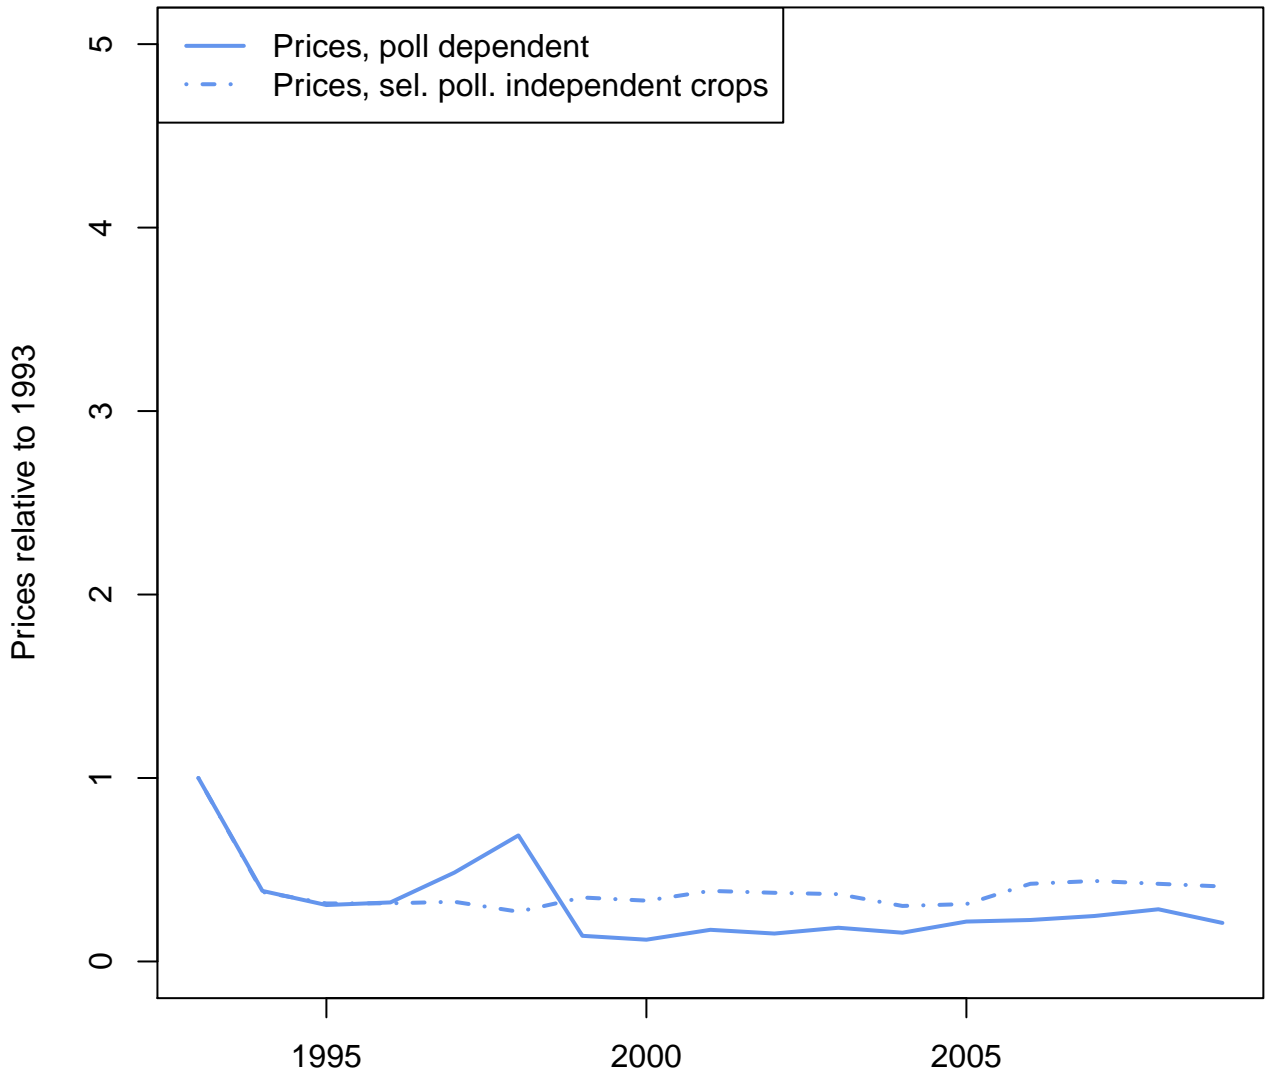

# Lao People's Democratic Republic

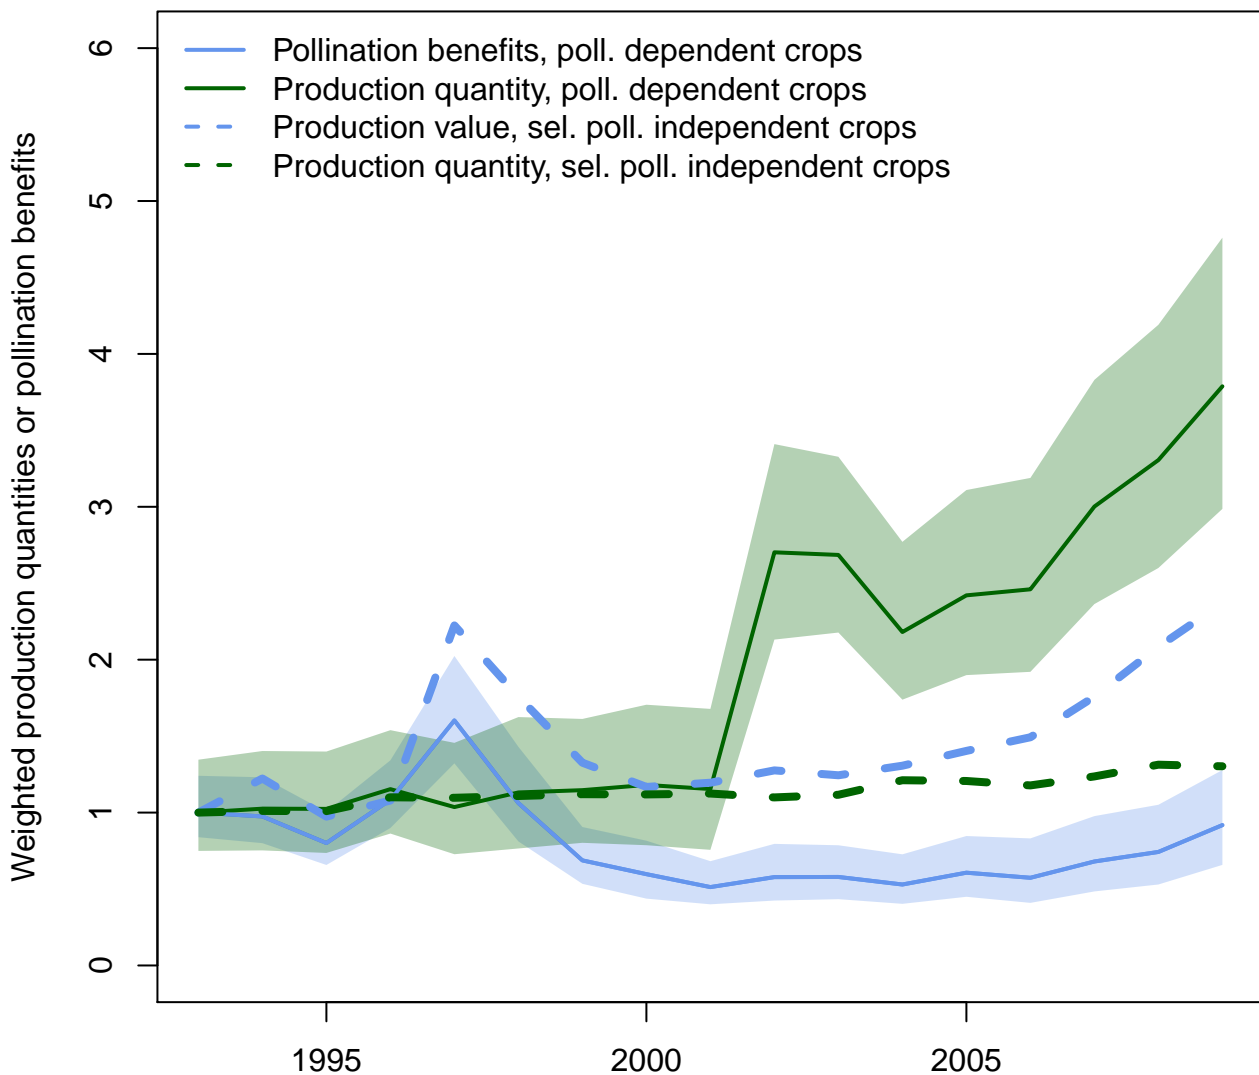

# Lao People's Democratic Republic

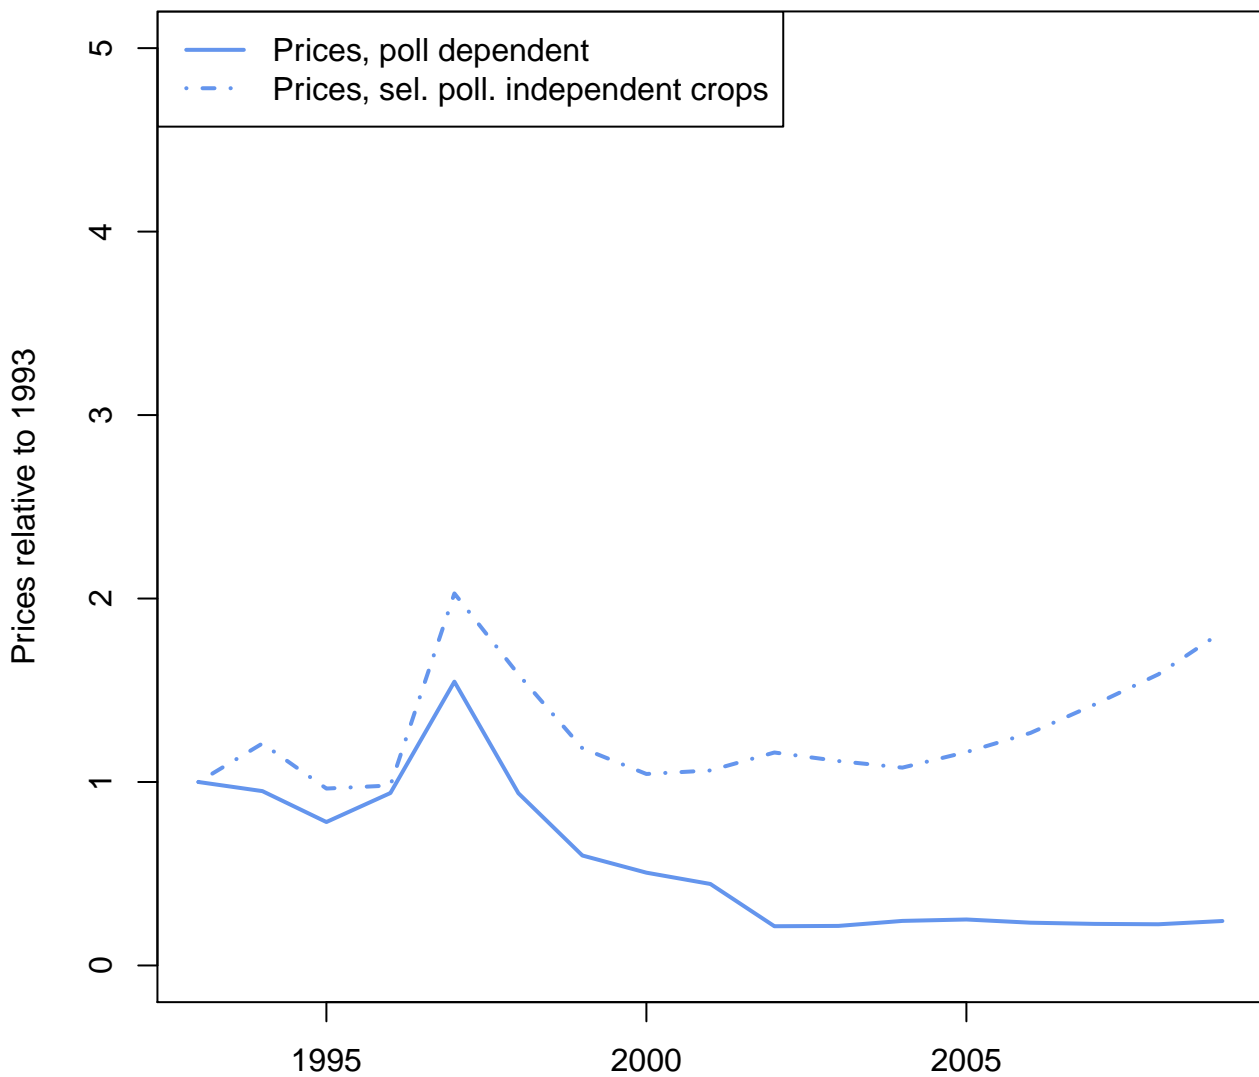



# Latvia

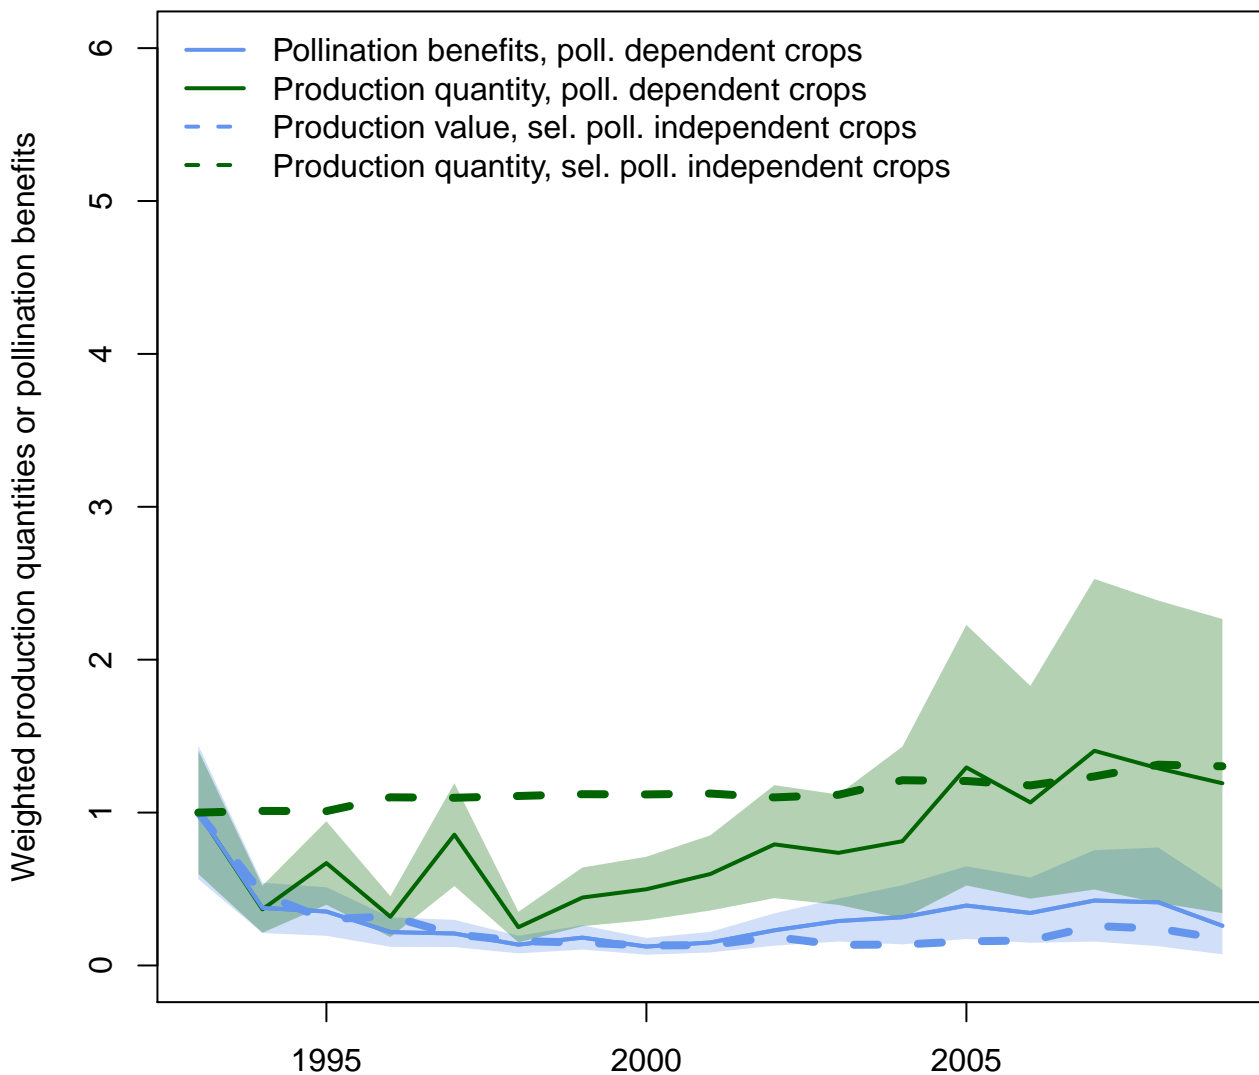

# Latvia

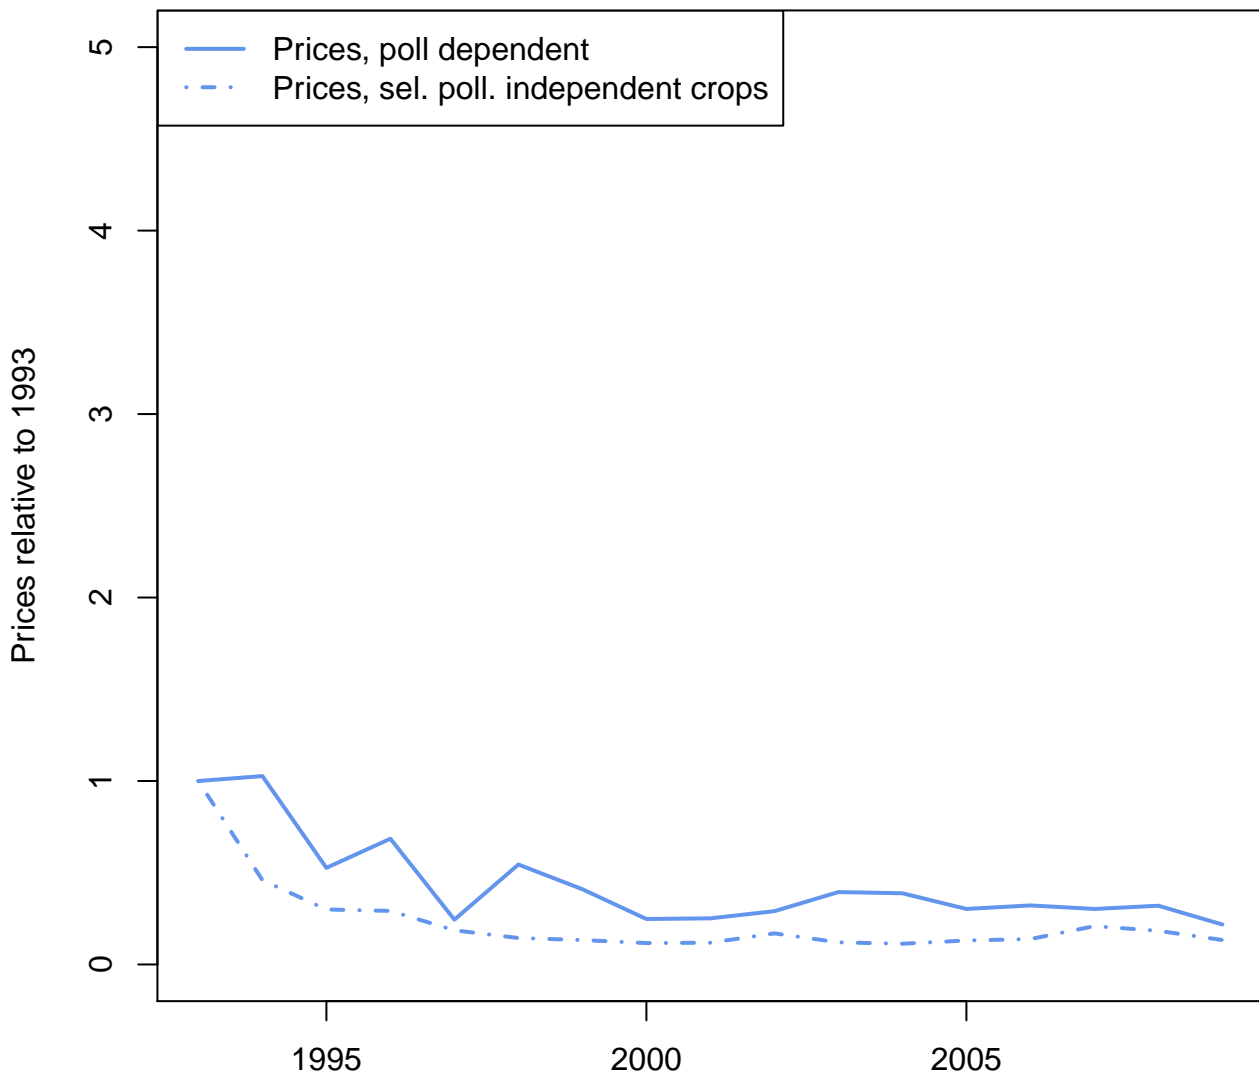

# Lebanon

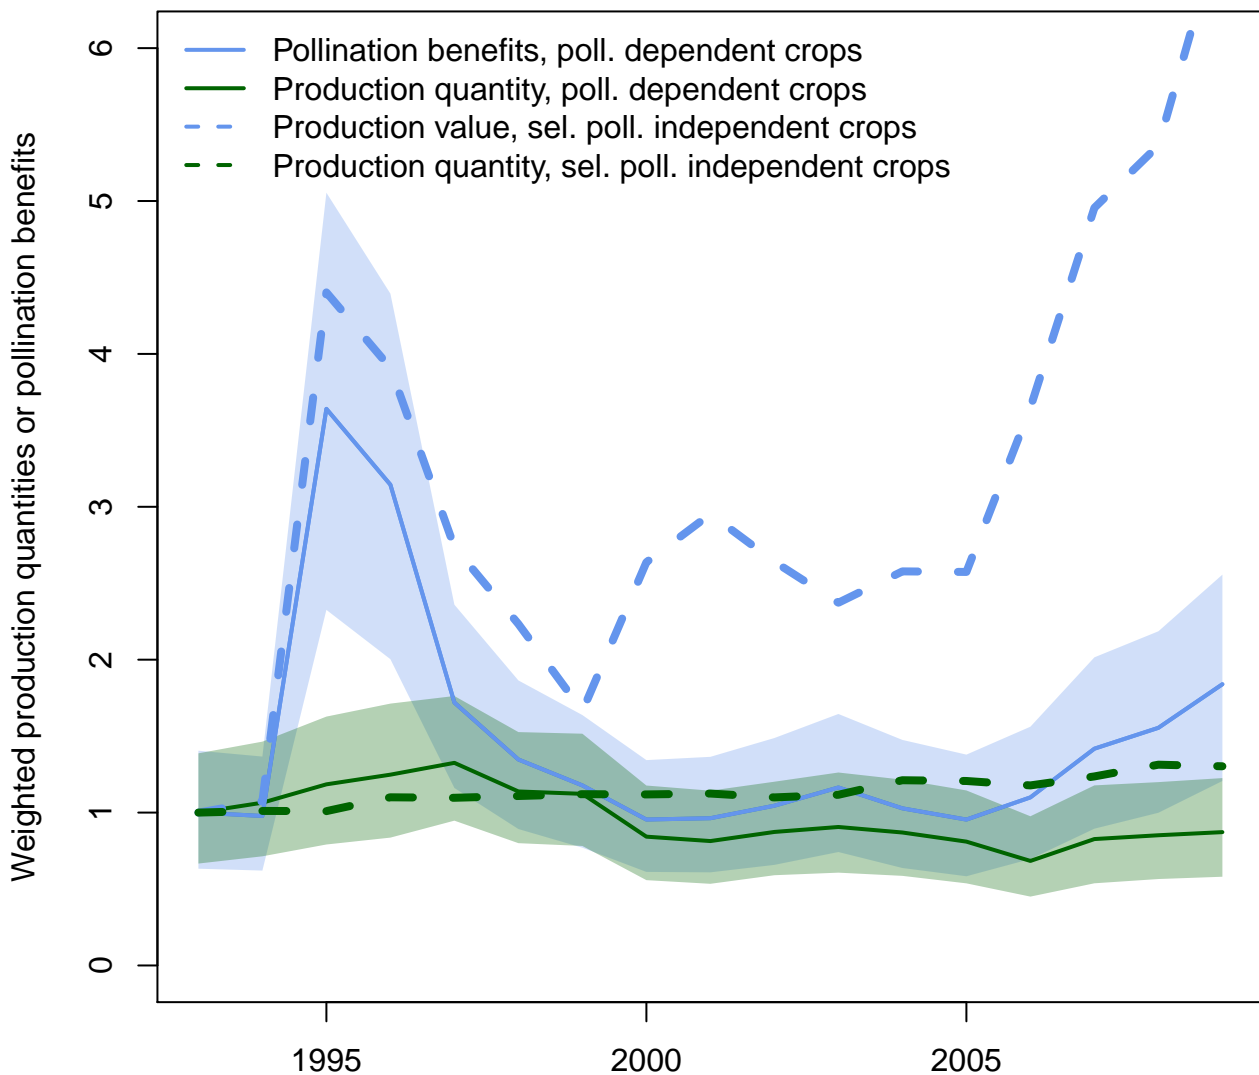

# Lebanon

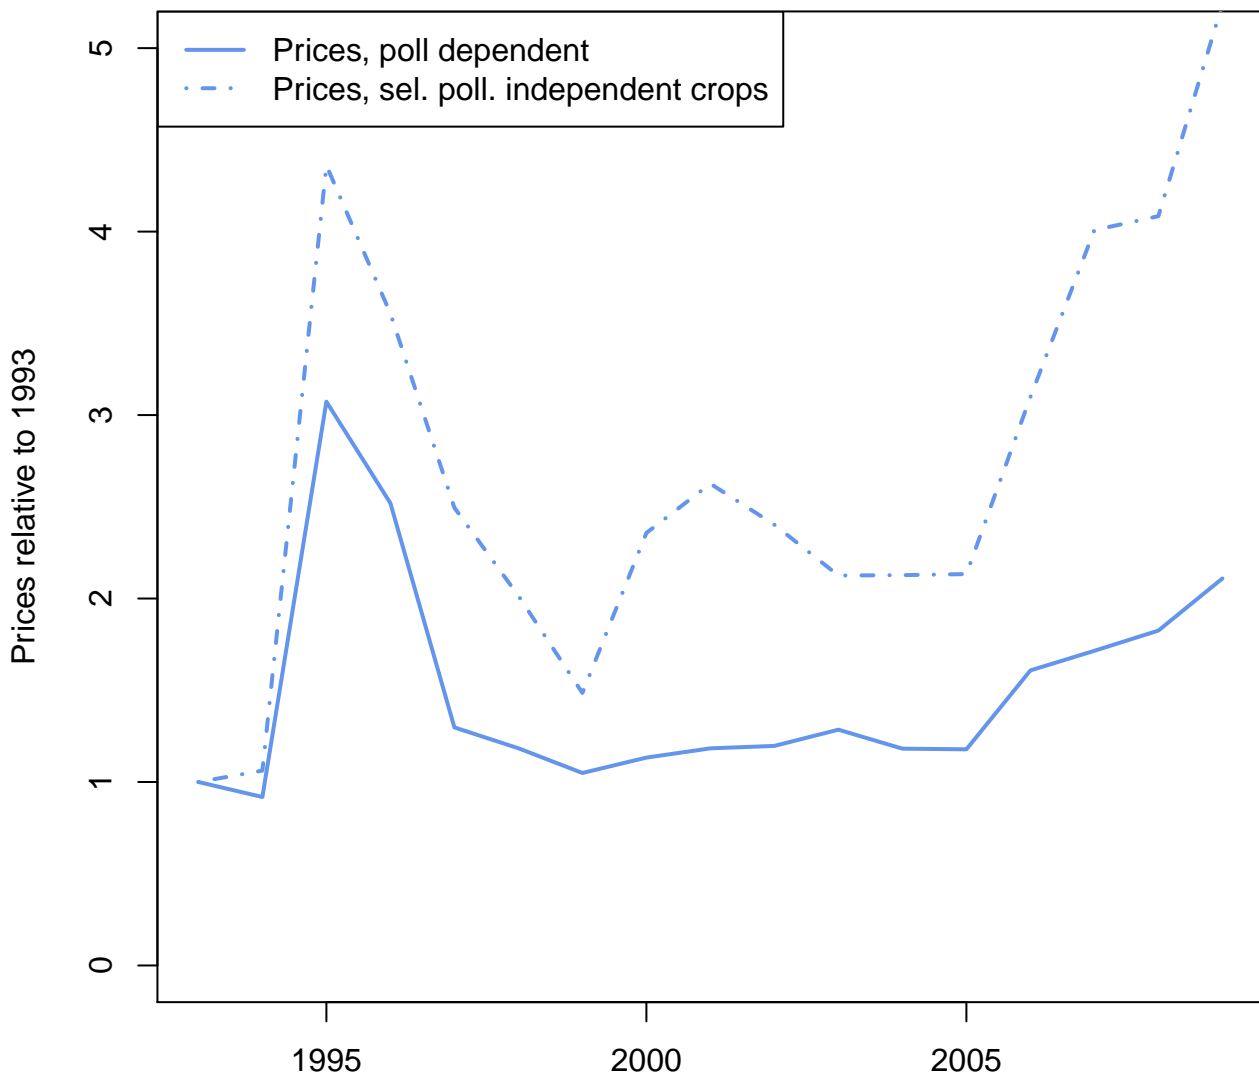

# Lithuania

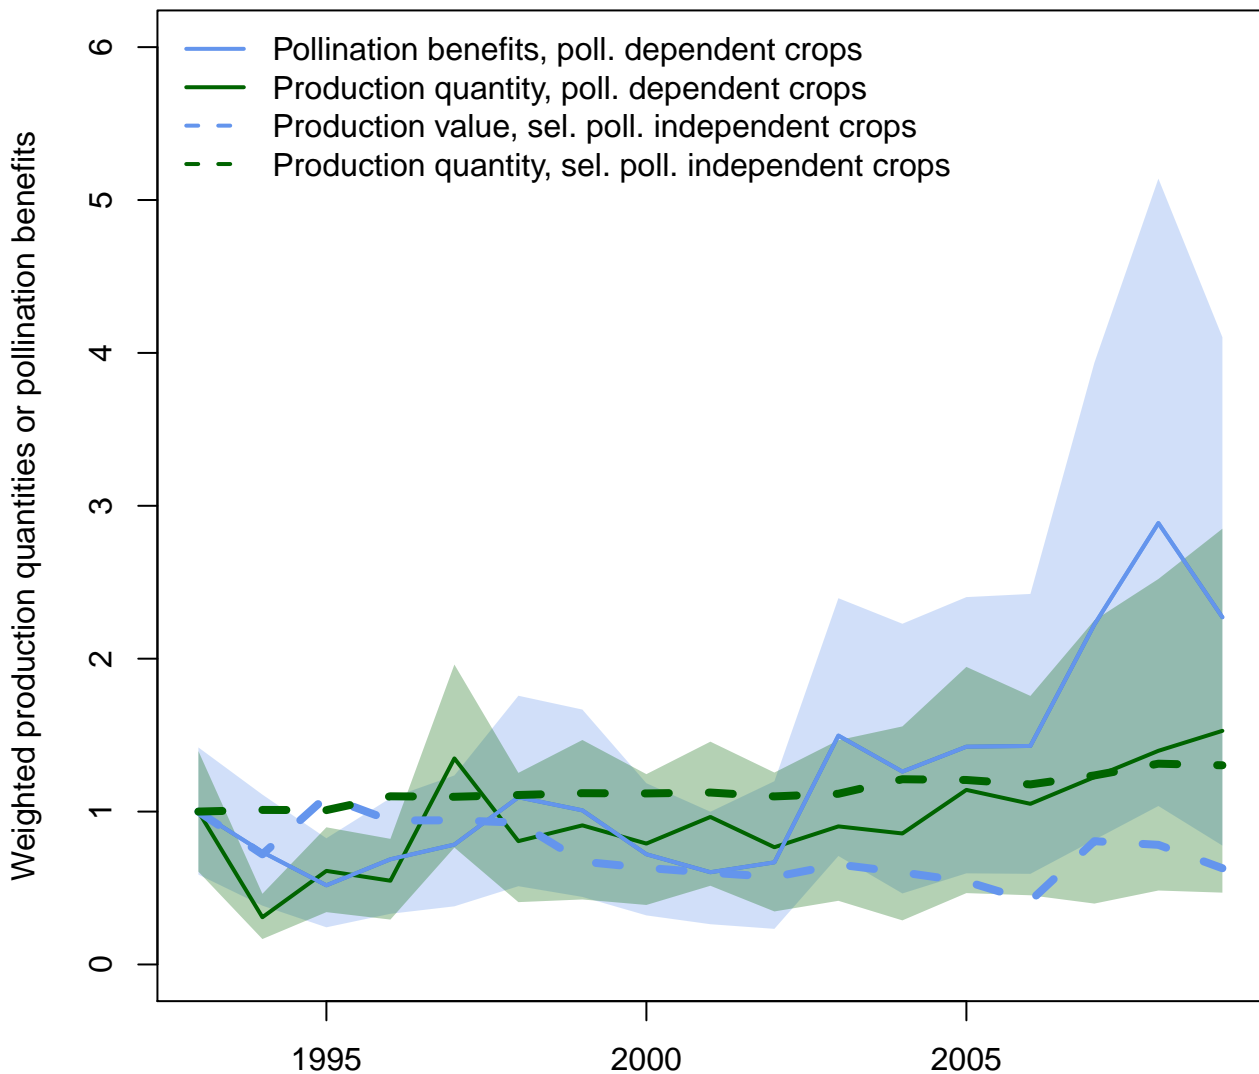

# Lithuania

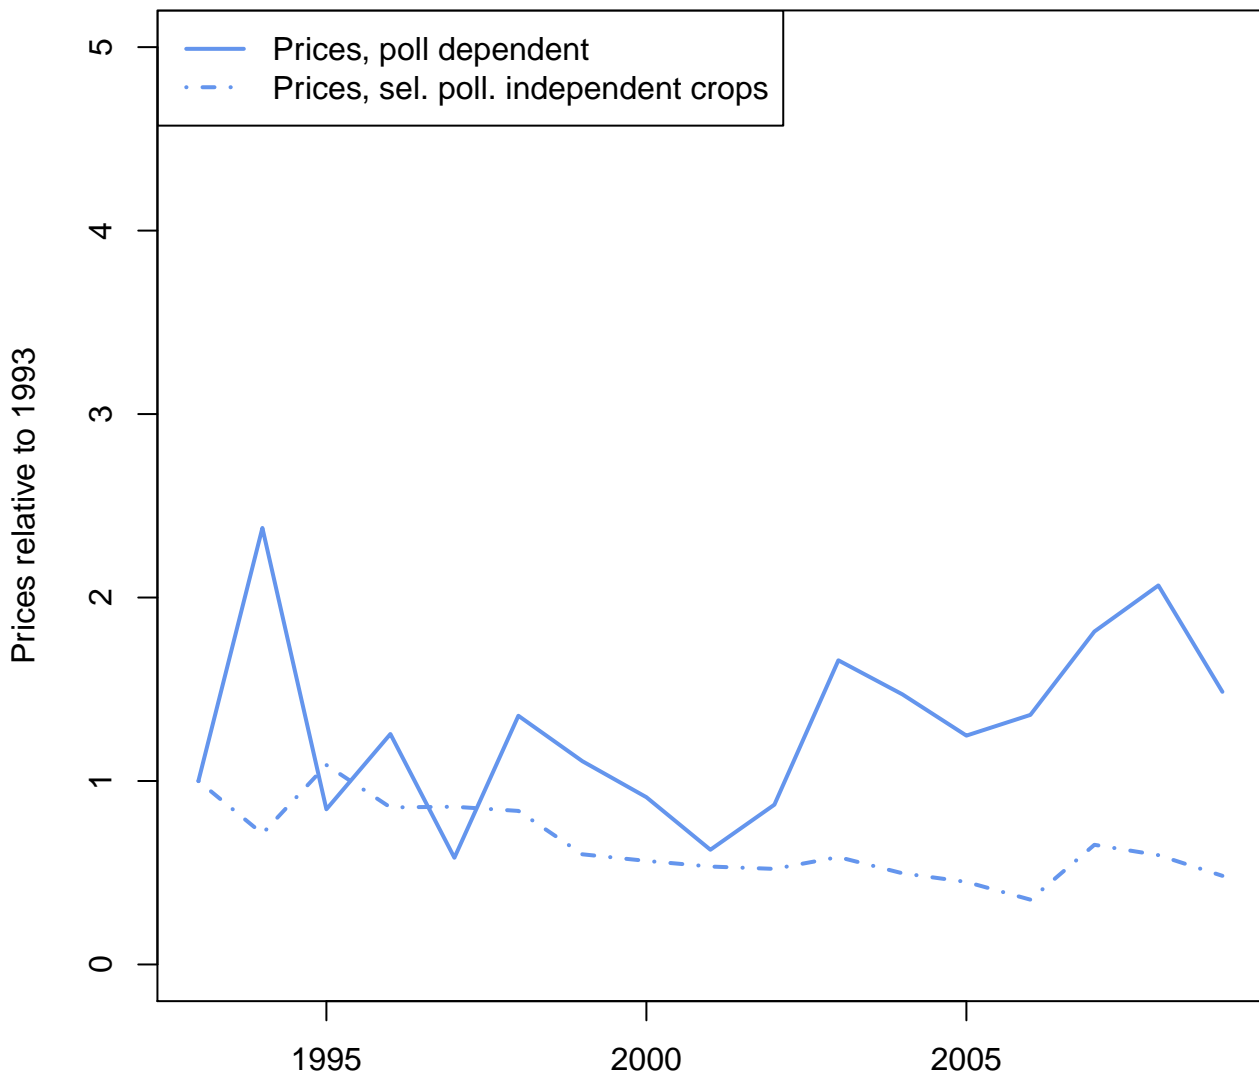

# Luxembourg

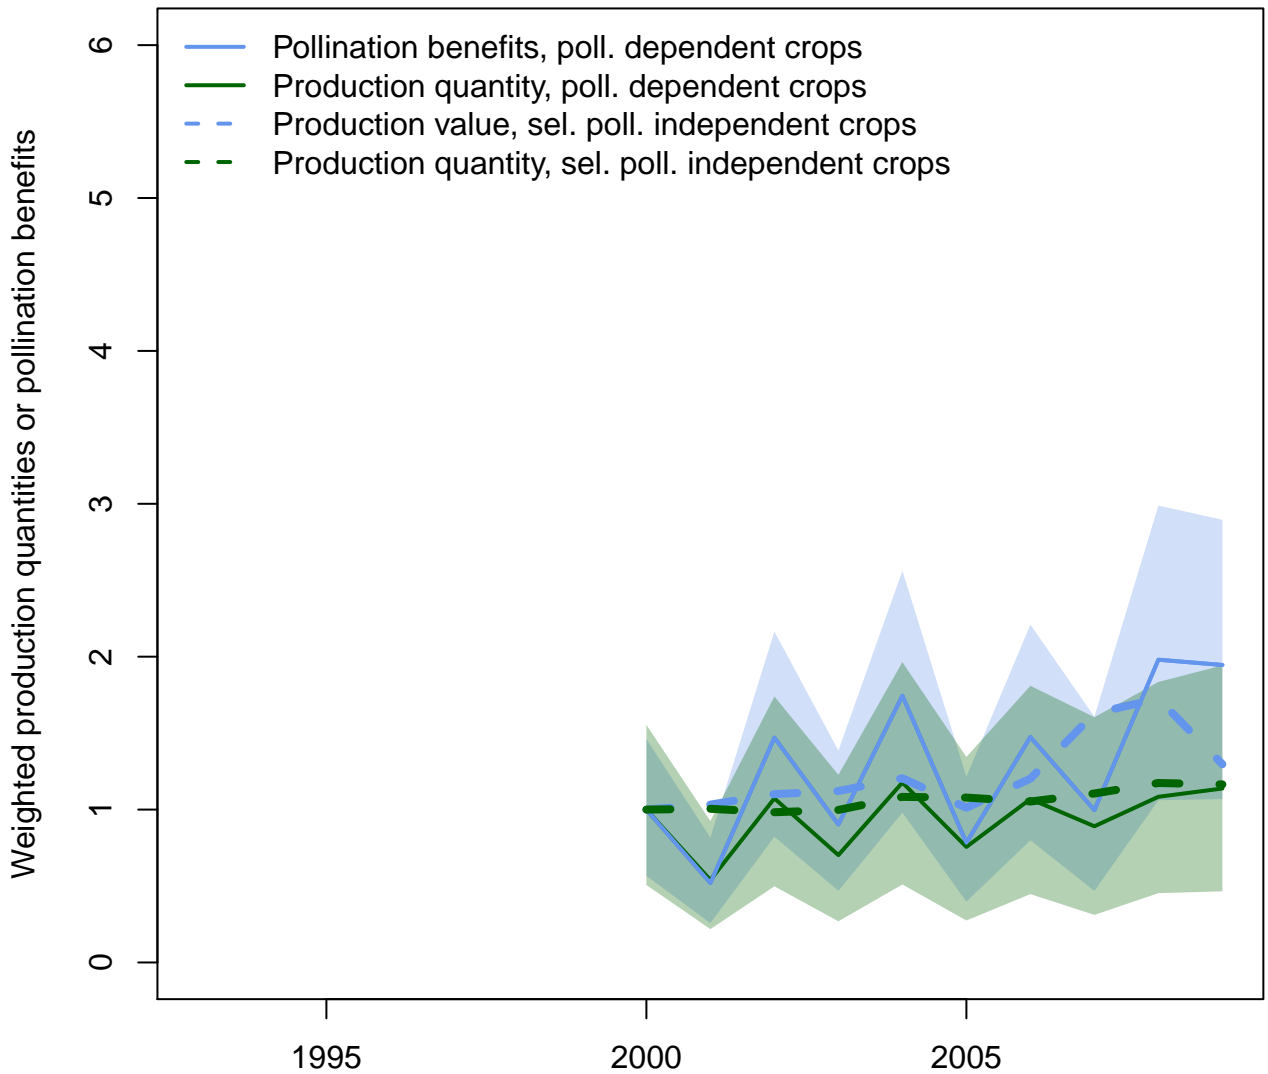

# Luxembourg

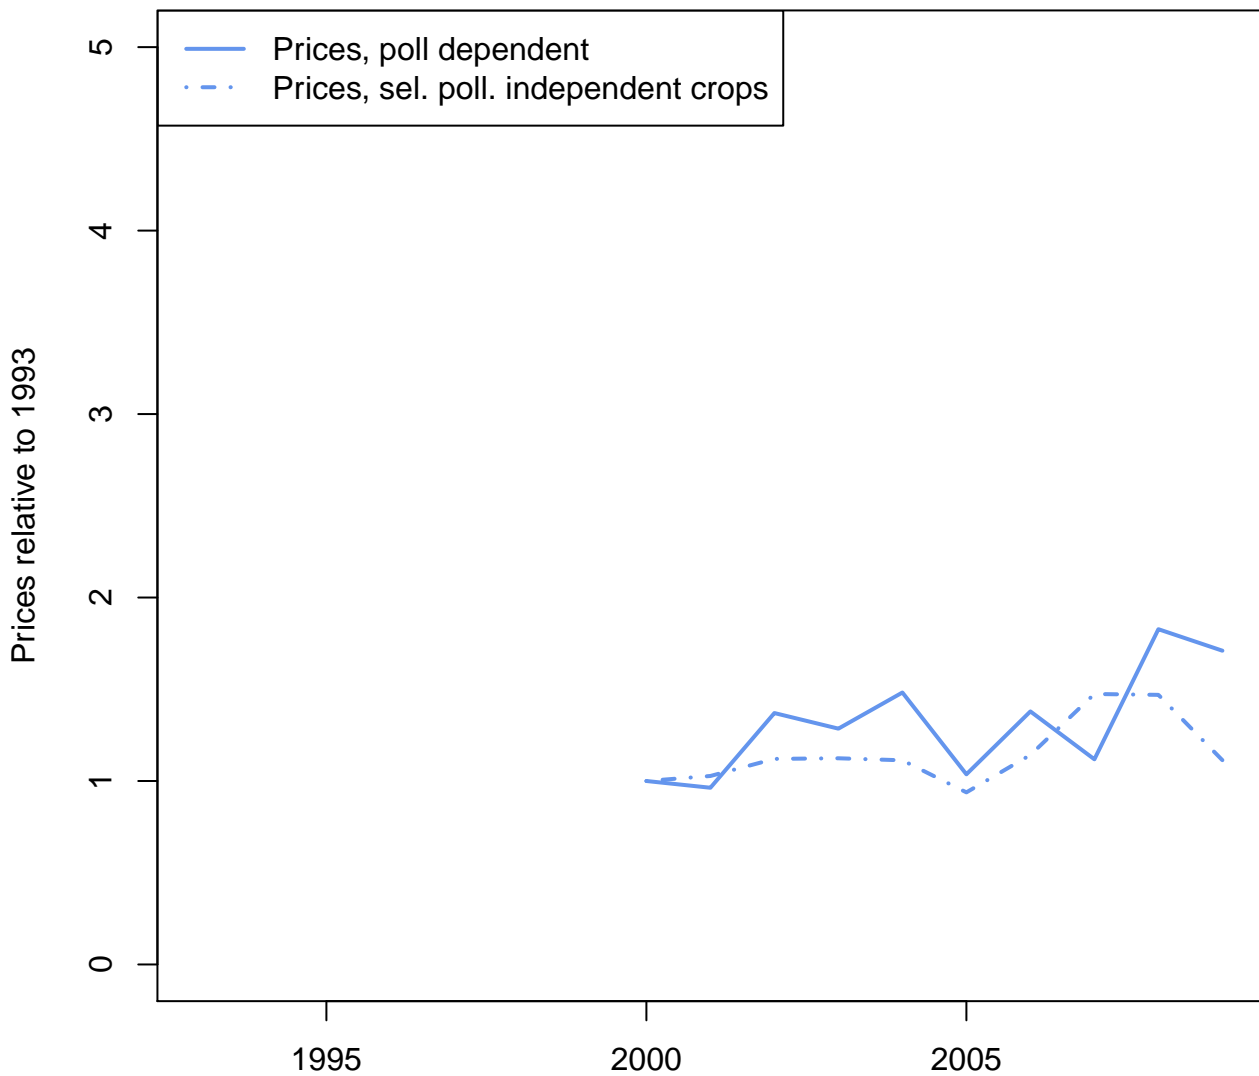



# Madagascar

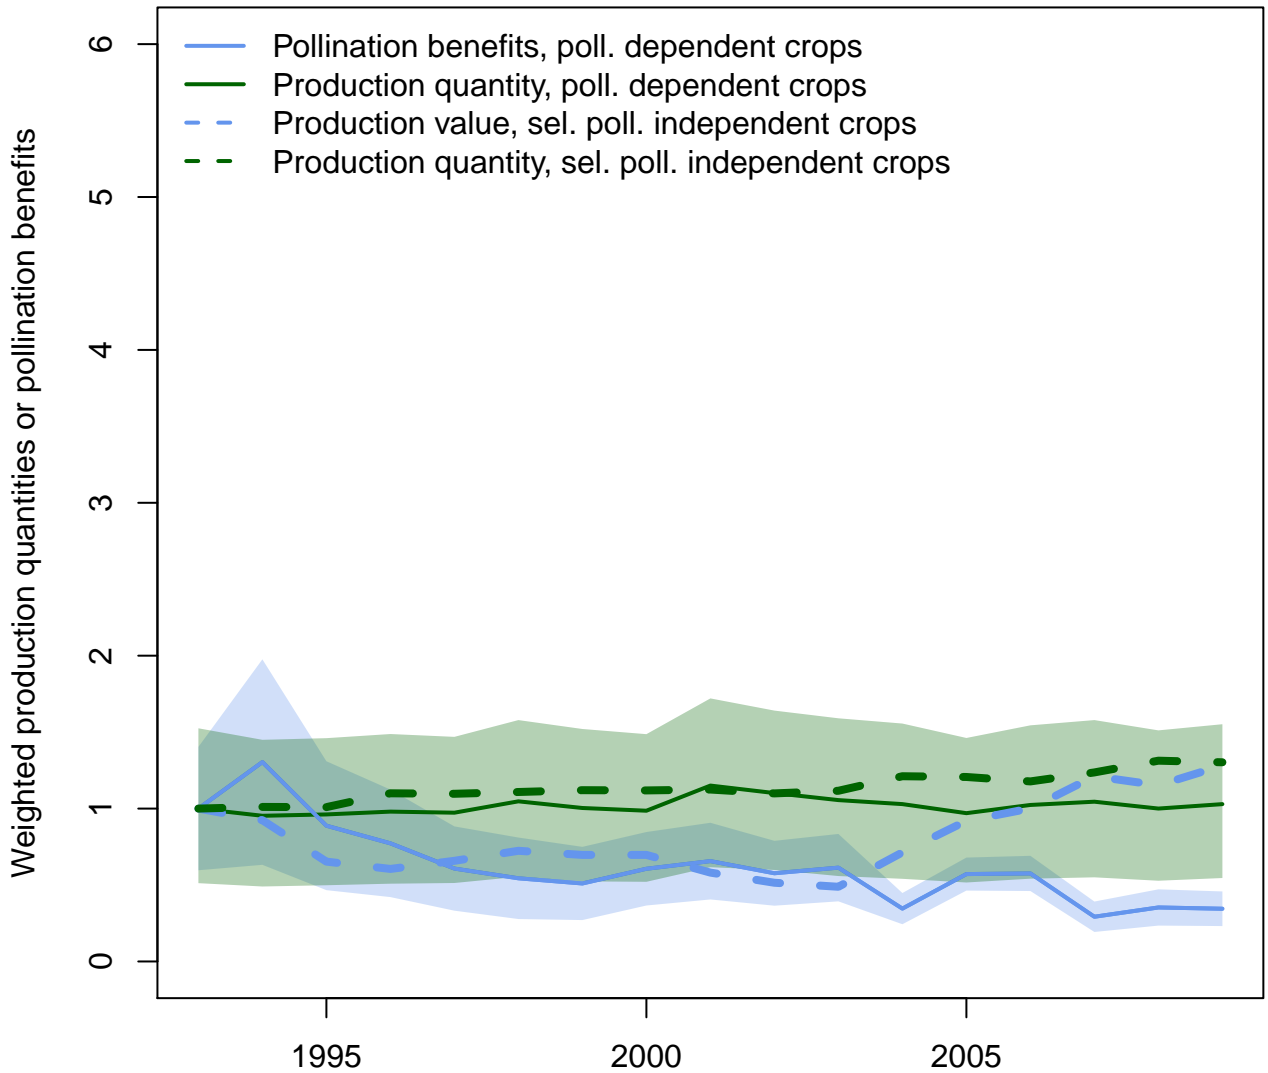

# Madagascar

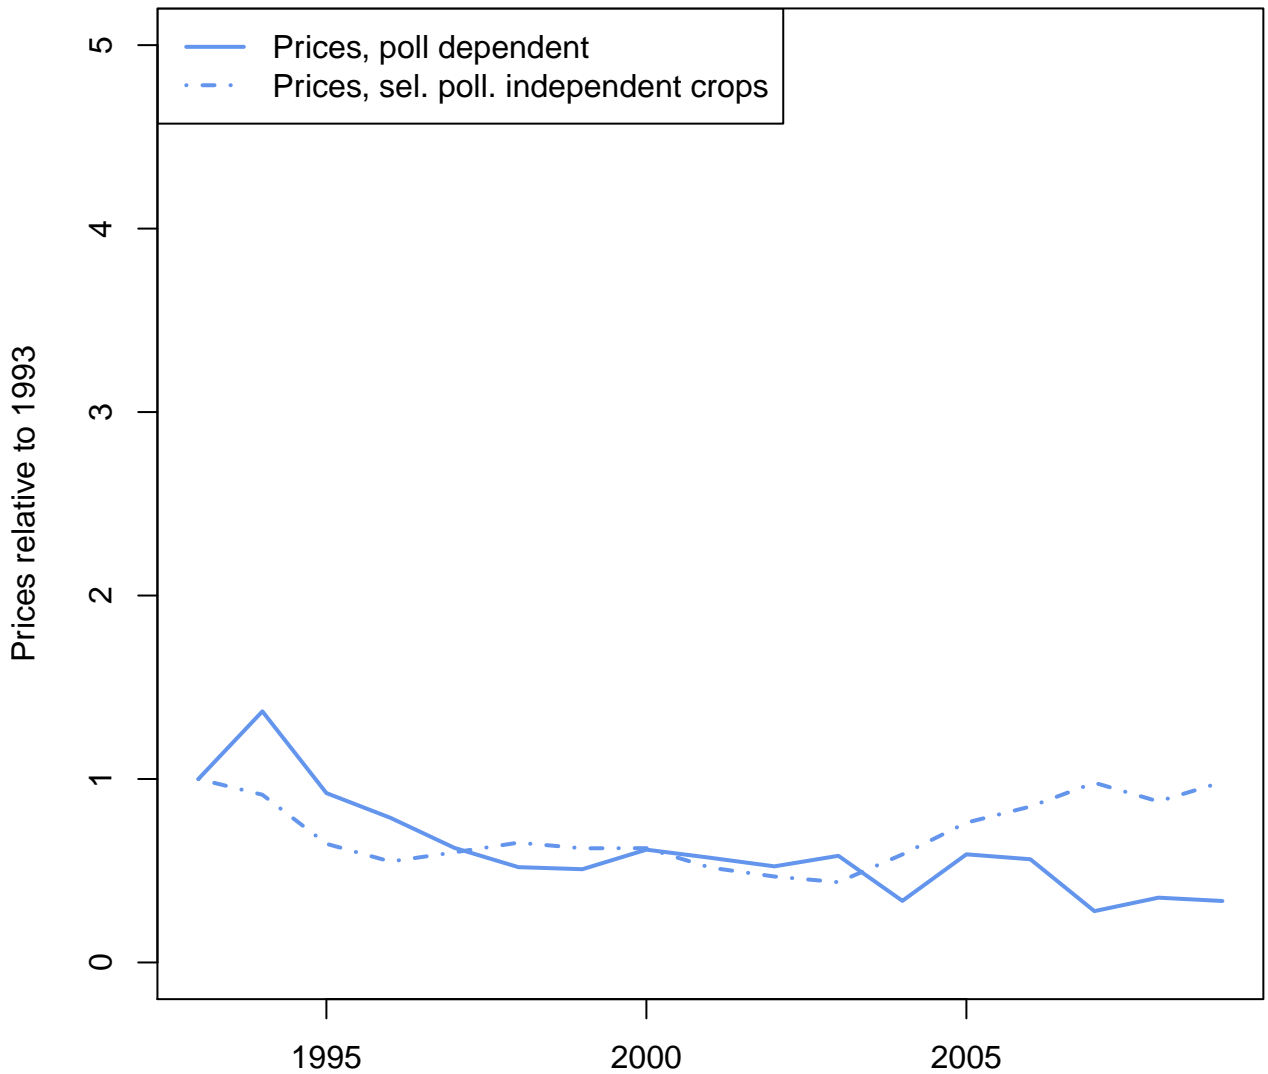

# Malawi

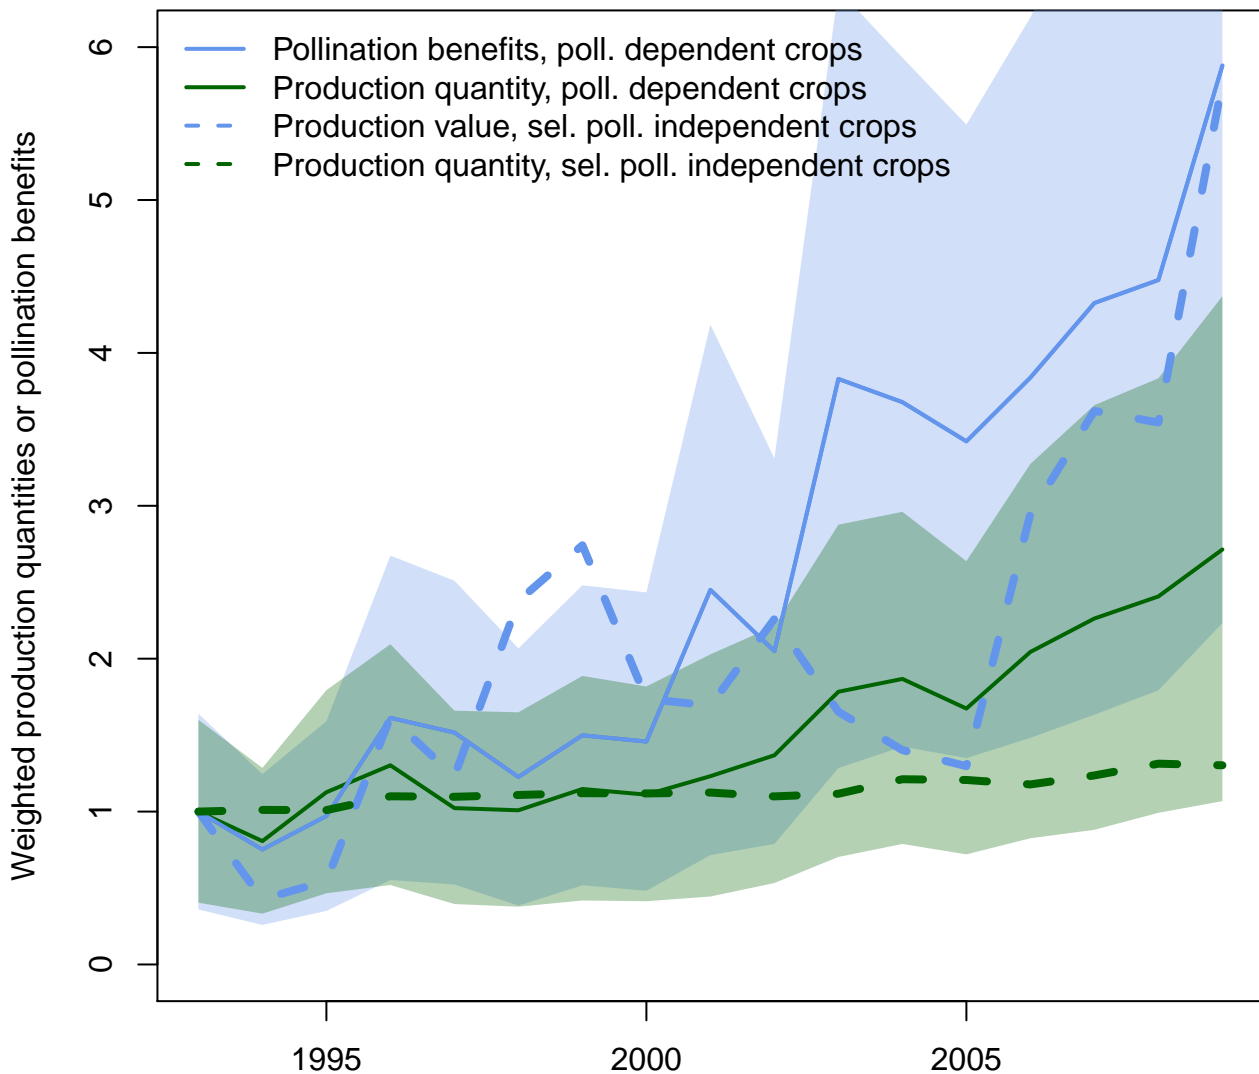

# Malawi

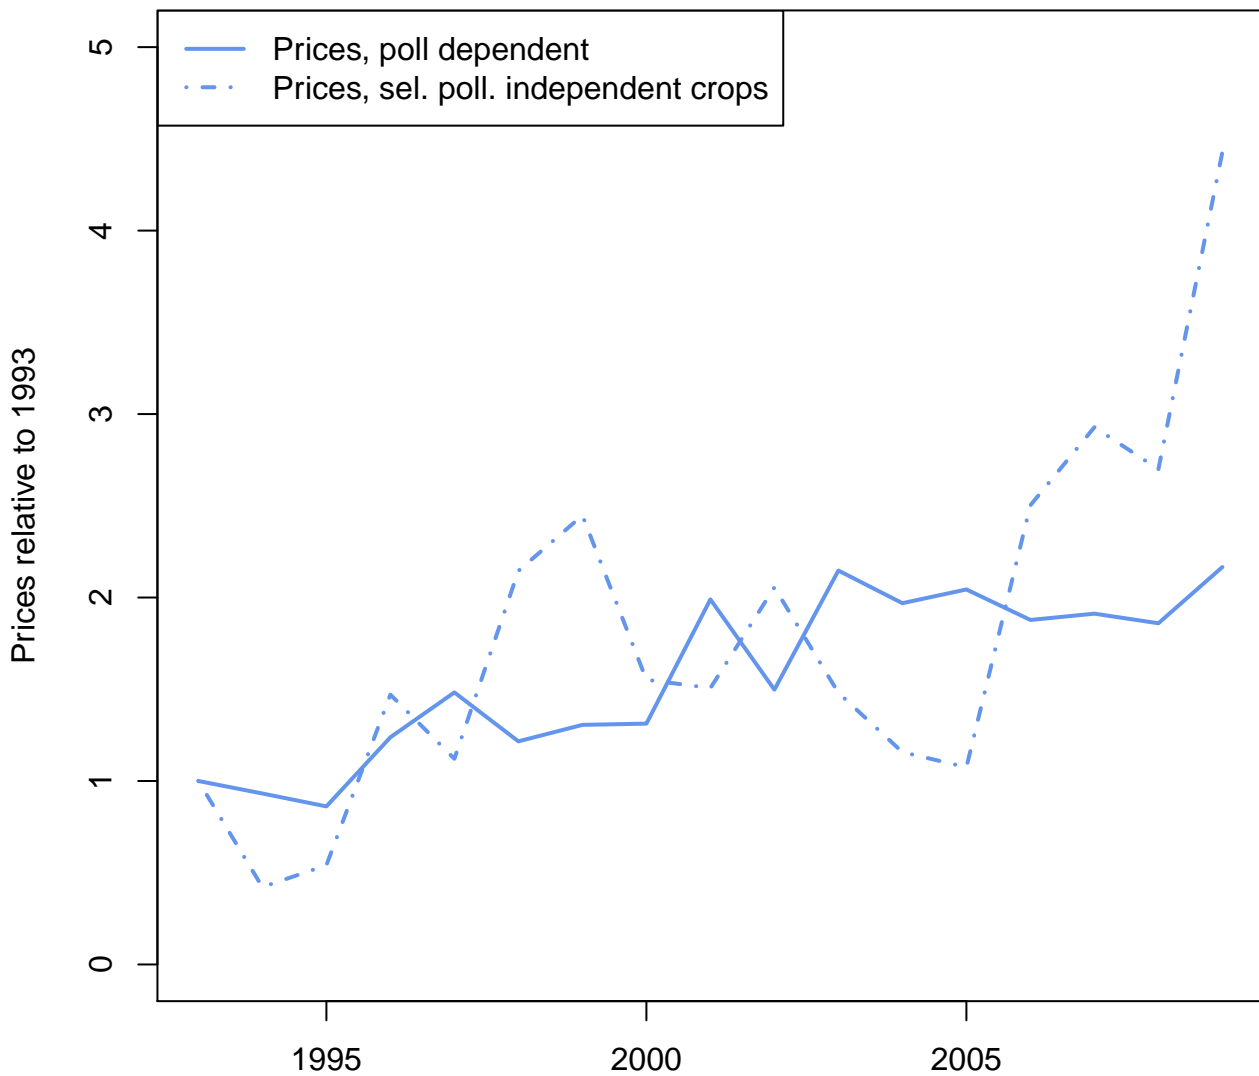

# Malaysia

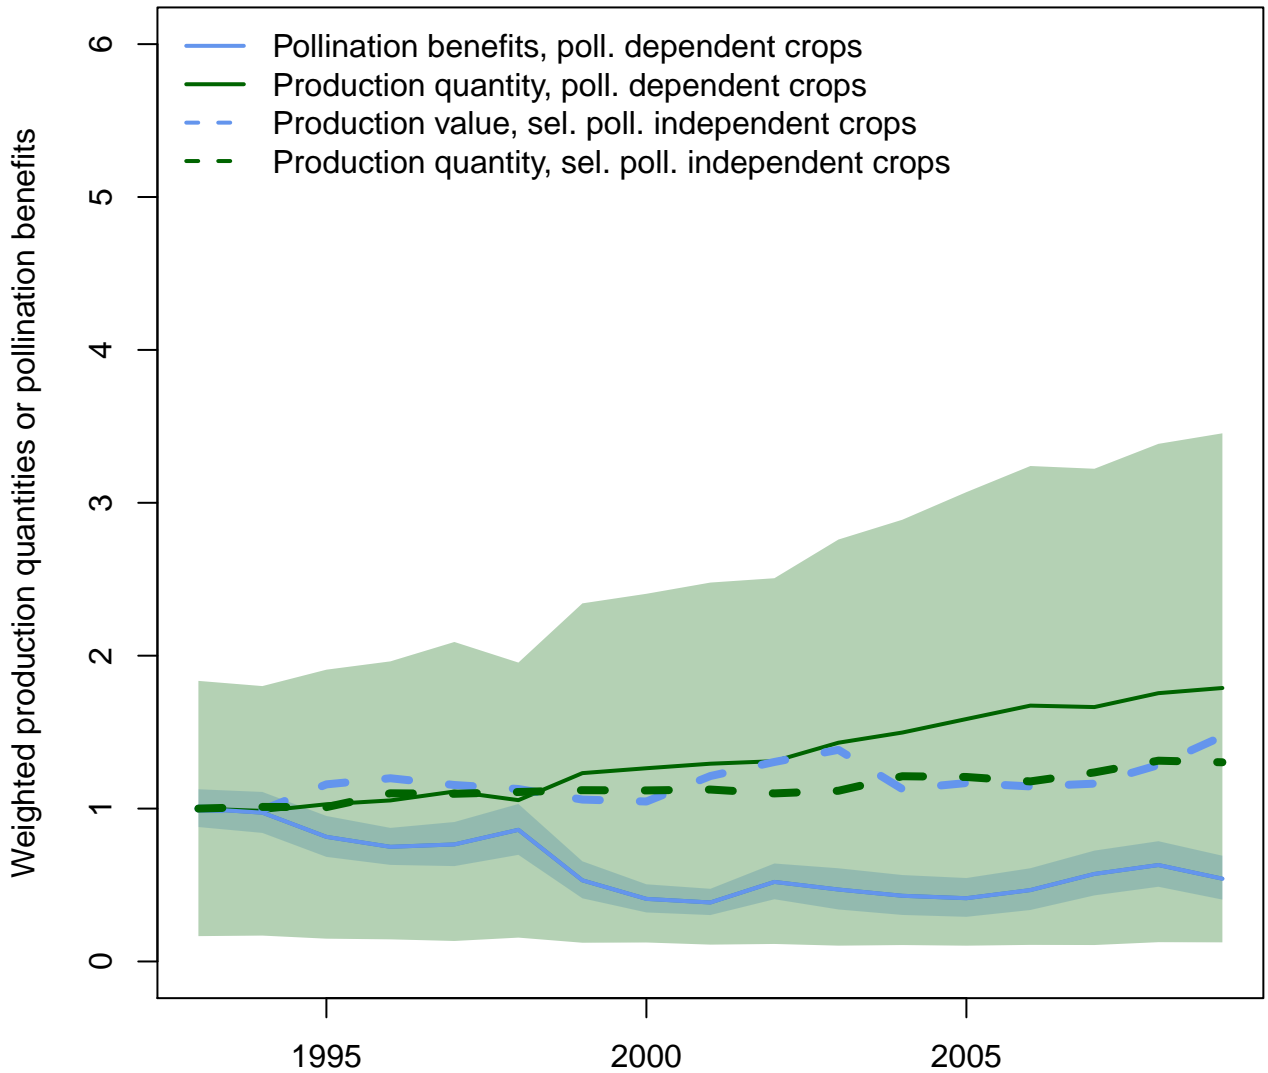

# Malaysia

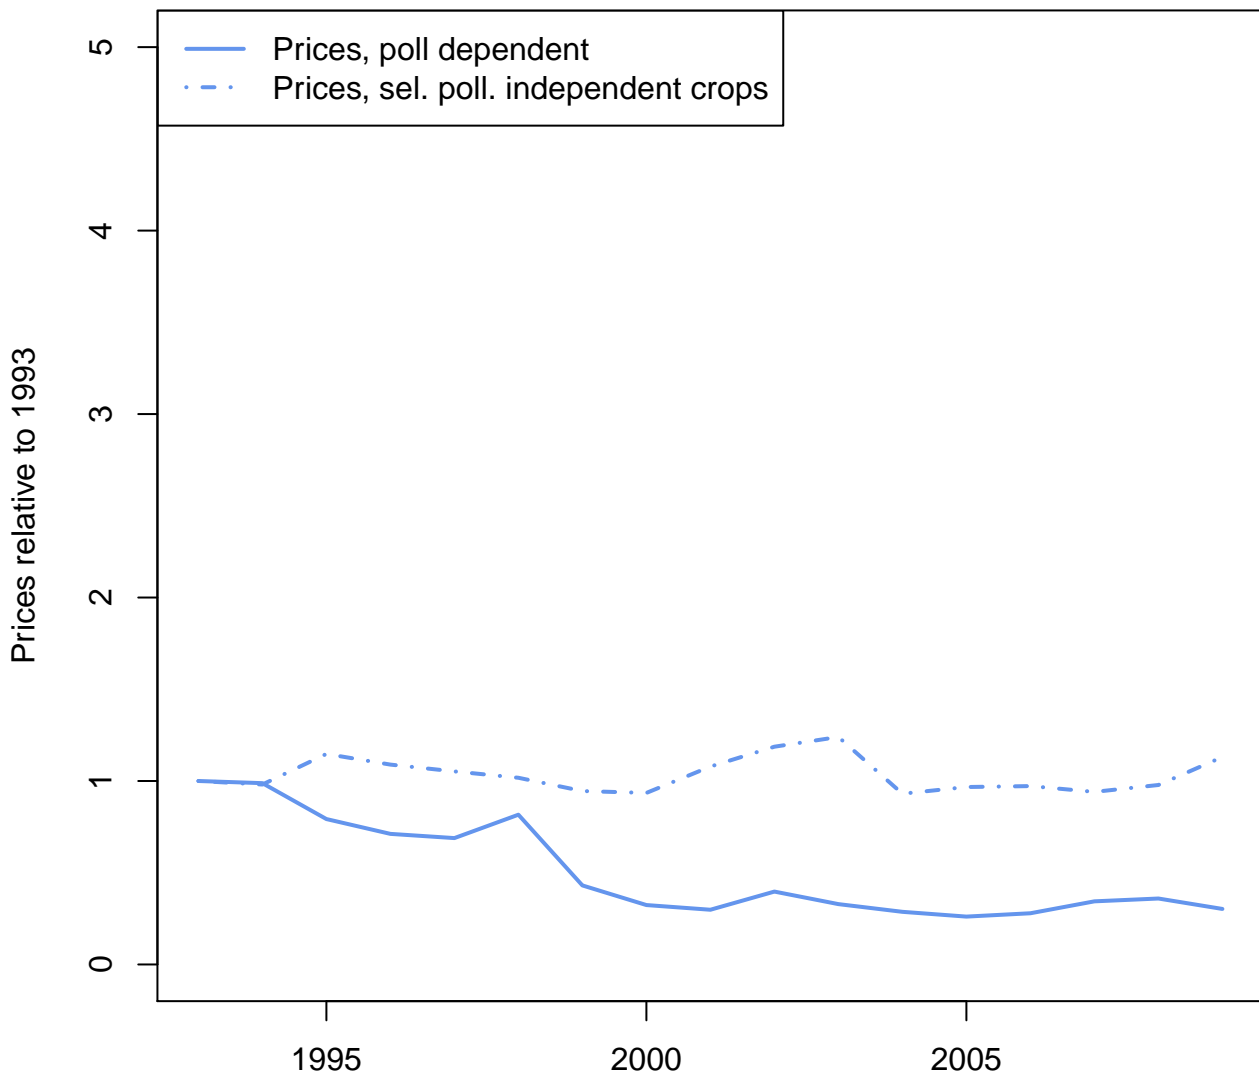

# Maldives

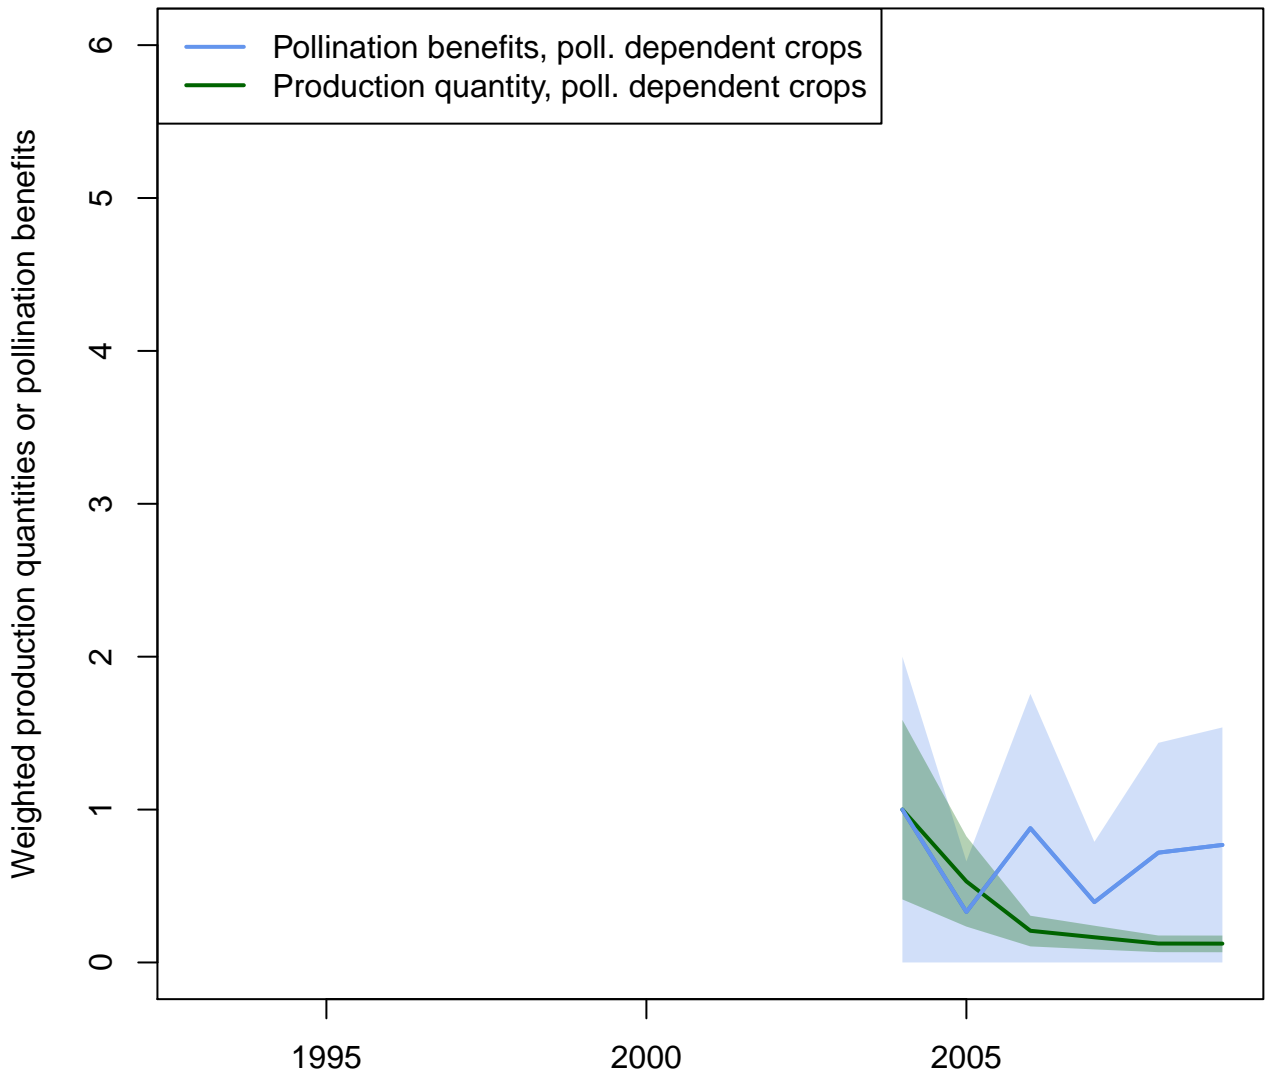

# Mali

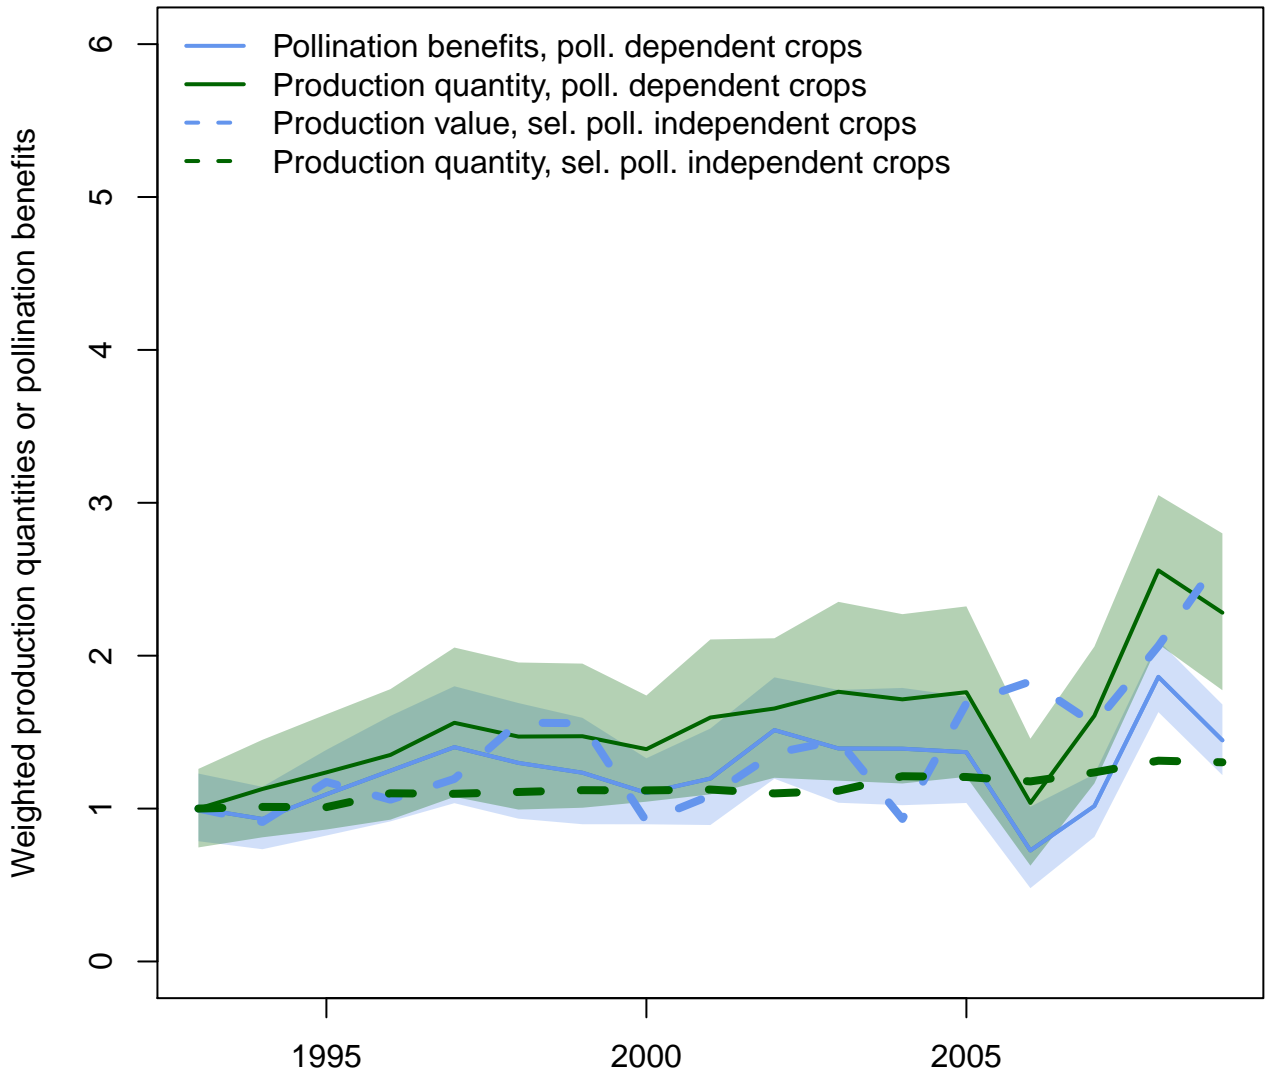



# Mali

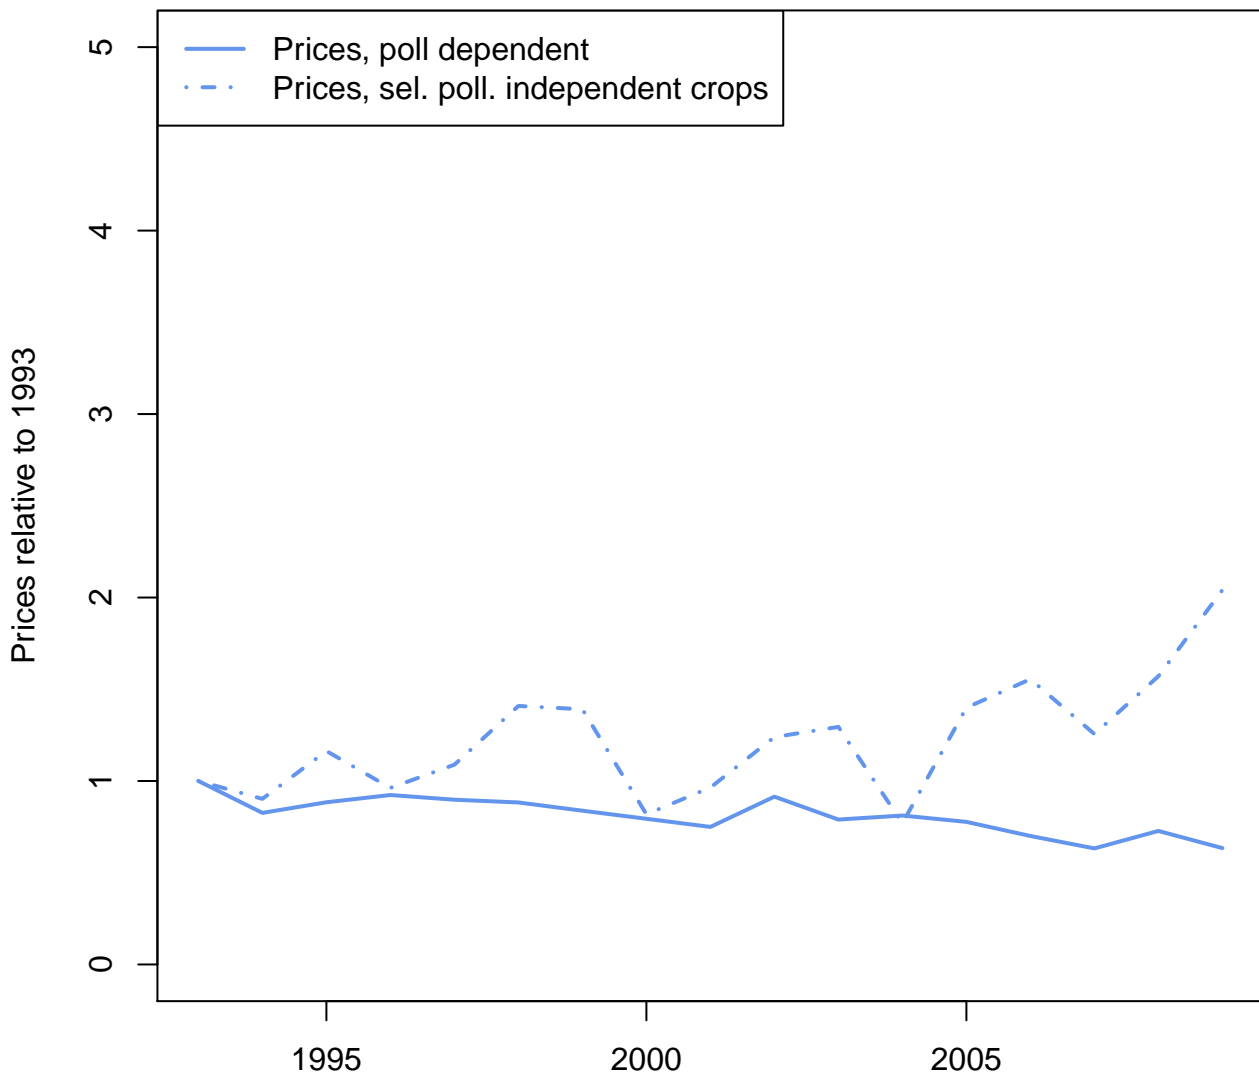

## Malta

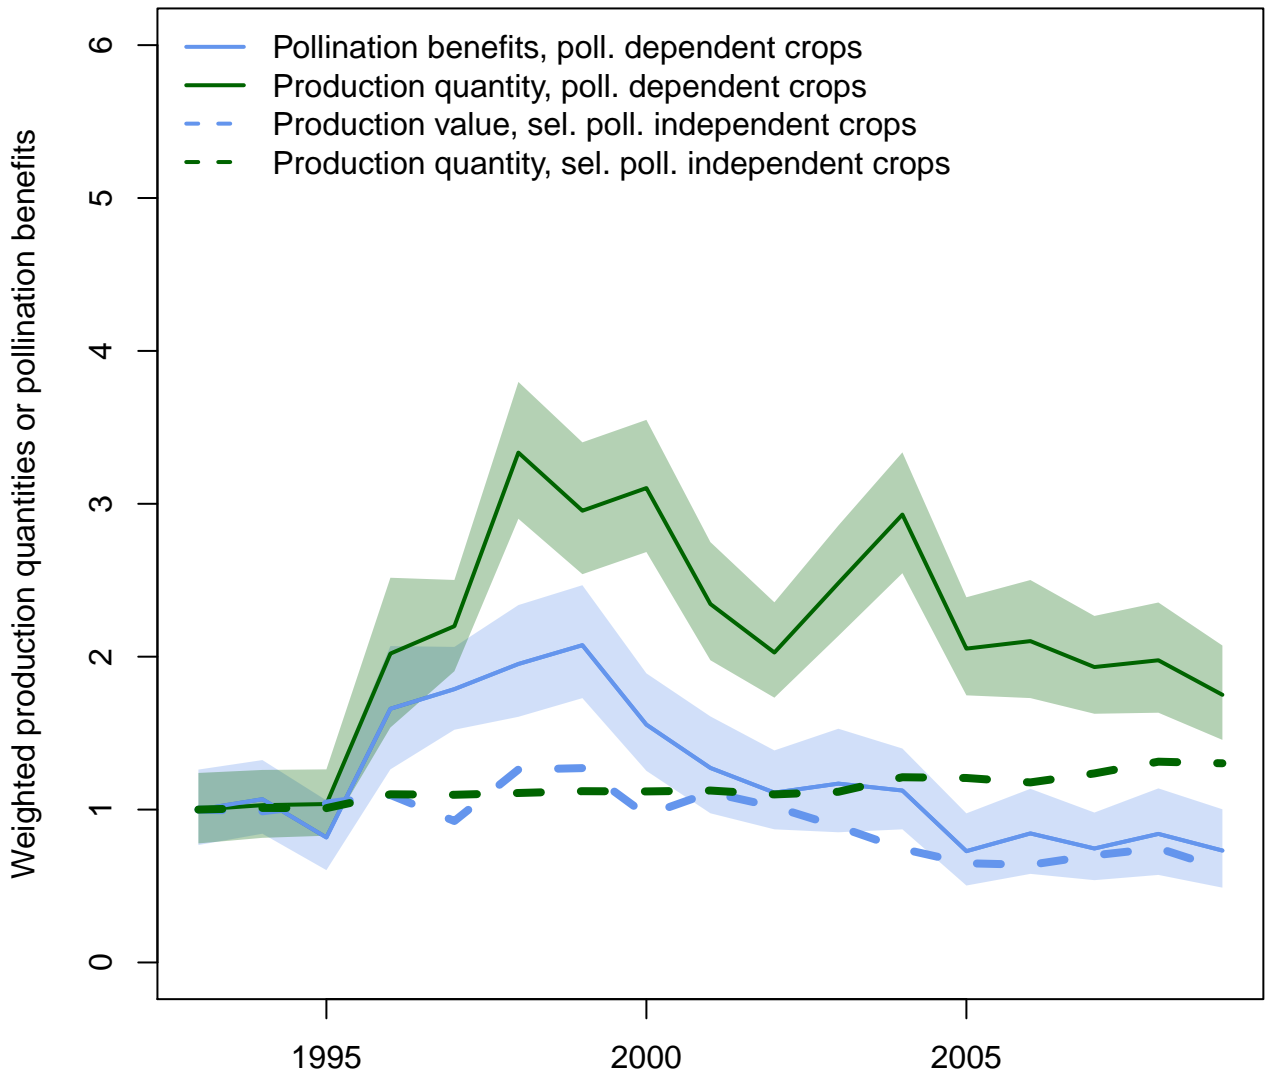

## Malta

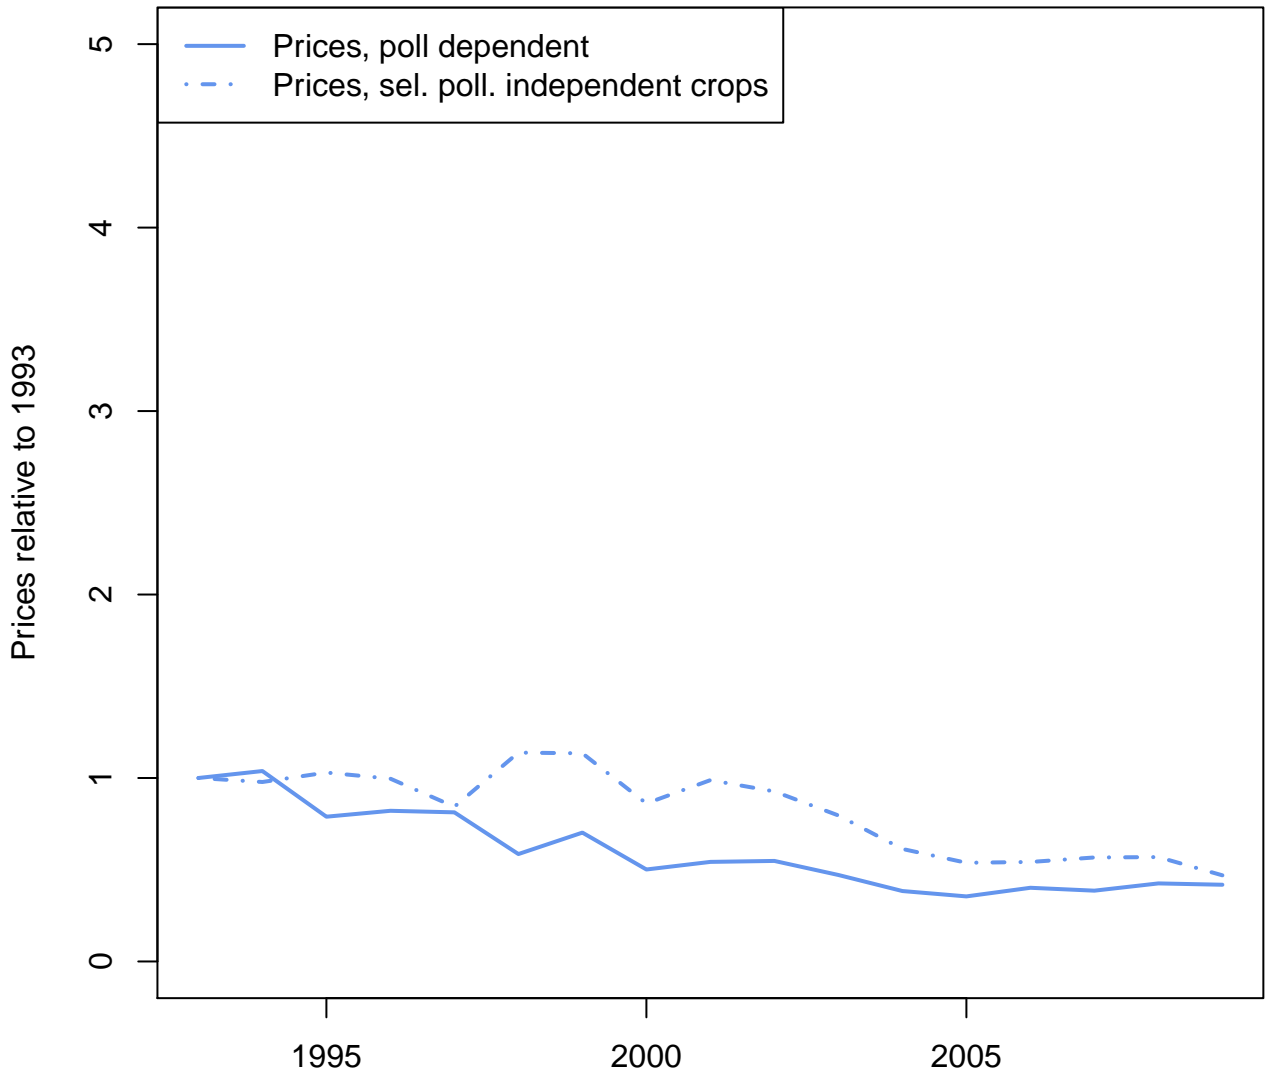

# Mauritius

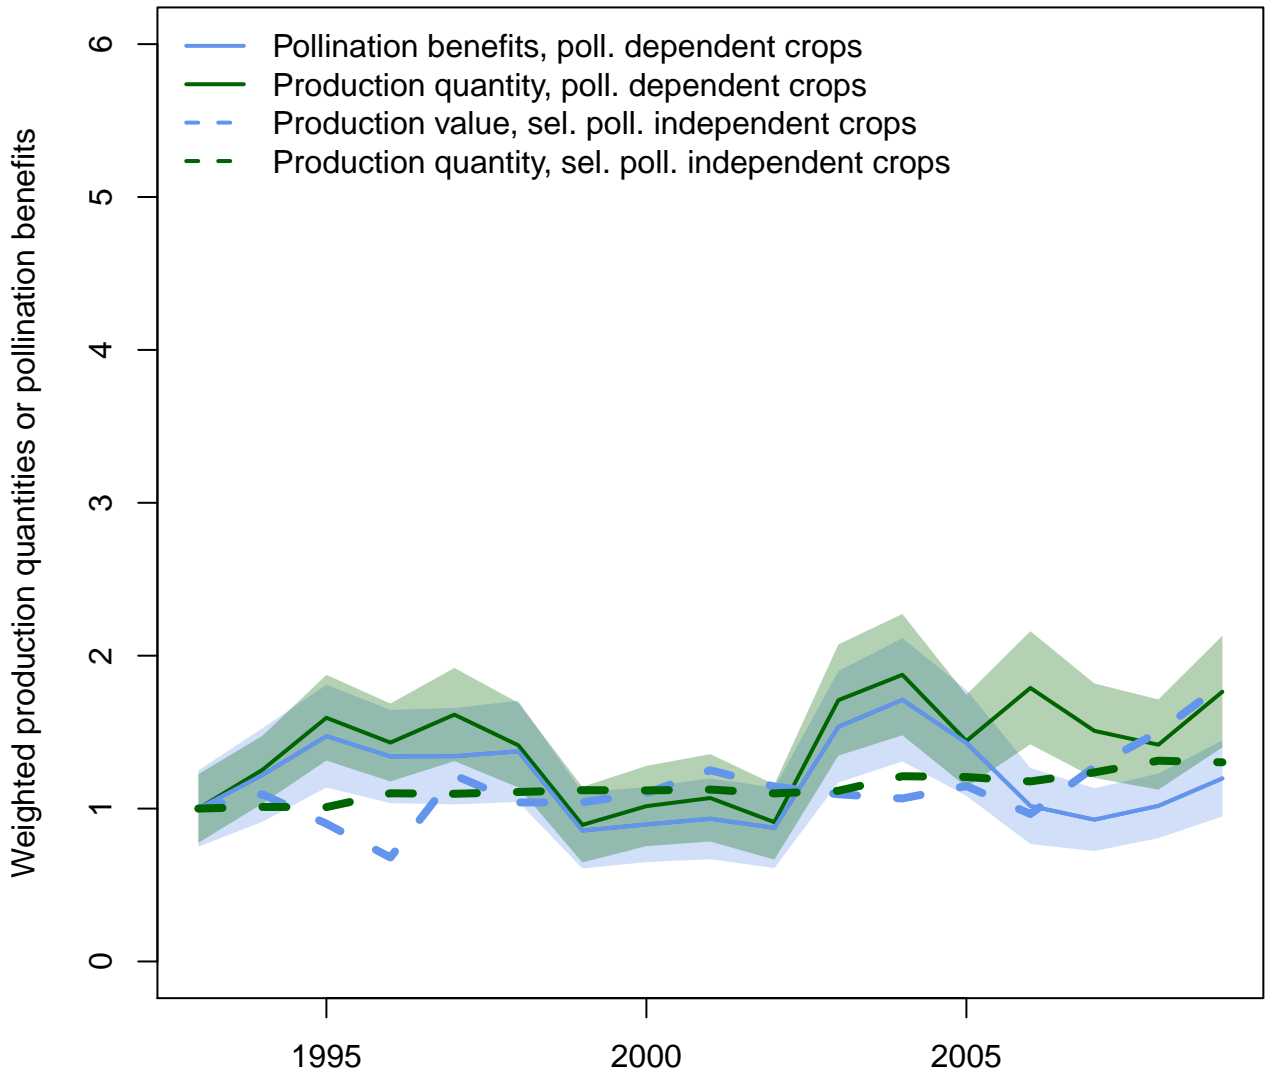

# Mauritius

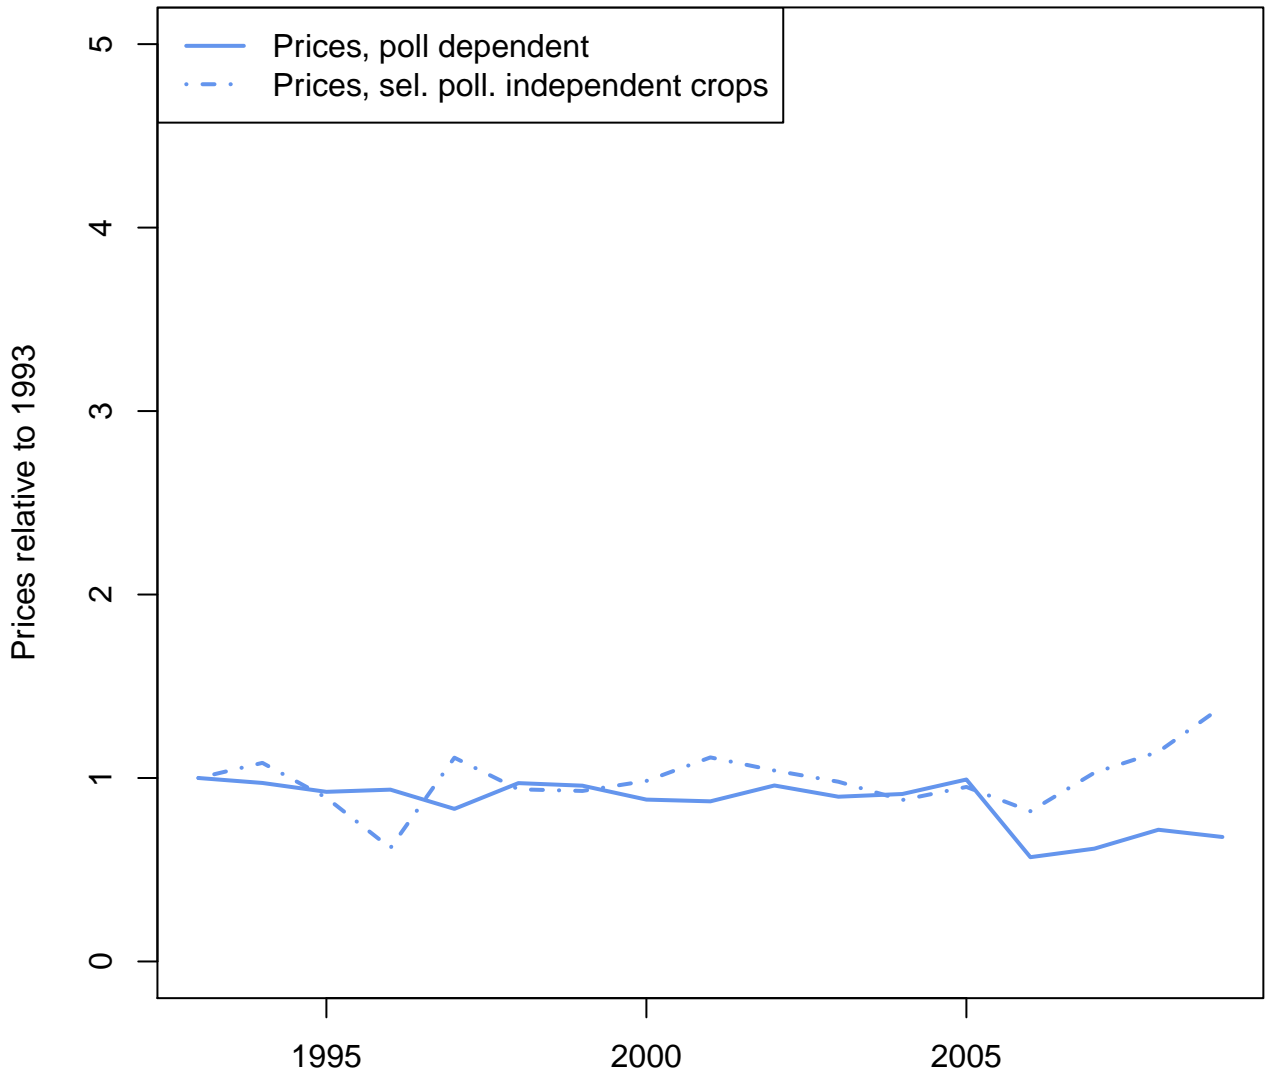

# Mexico

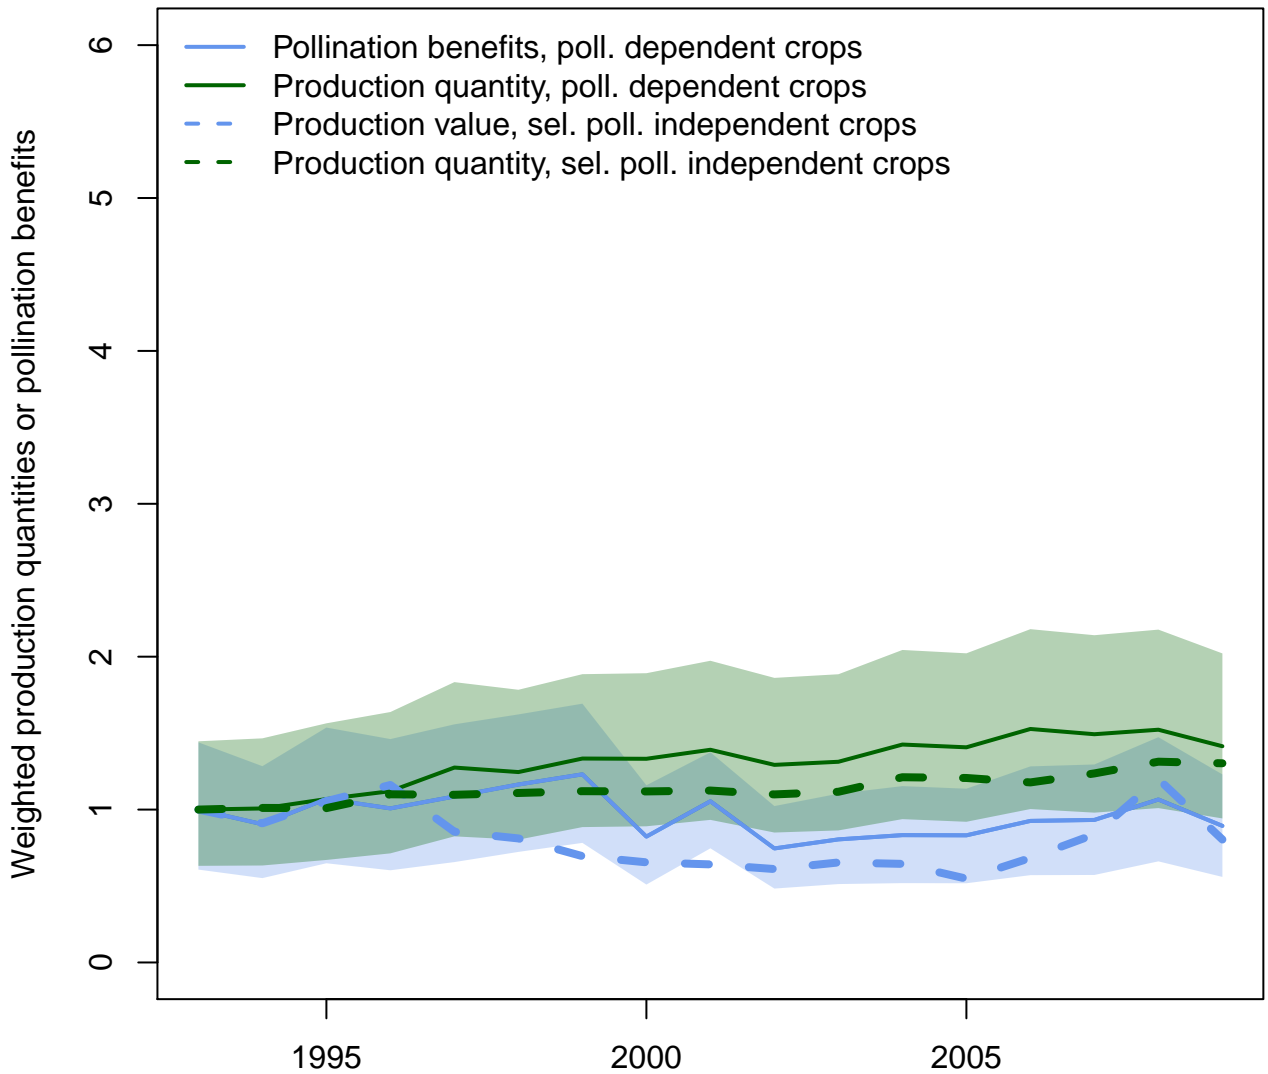

# Mexico

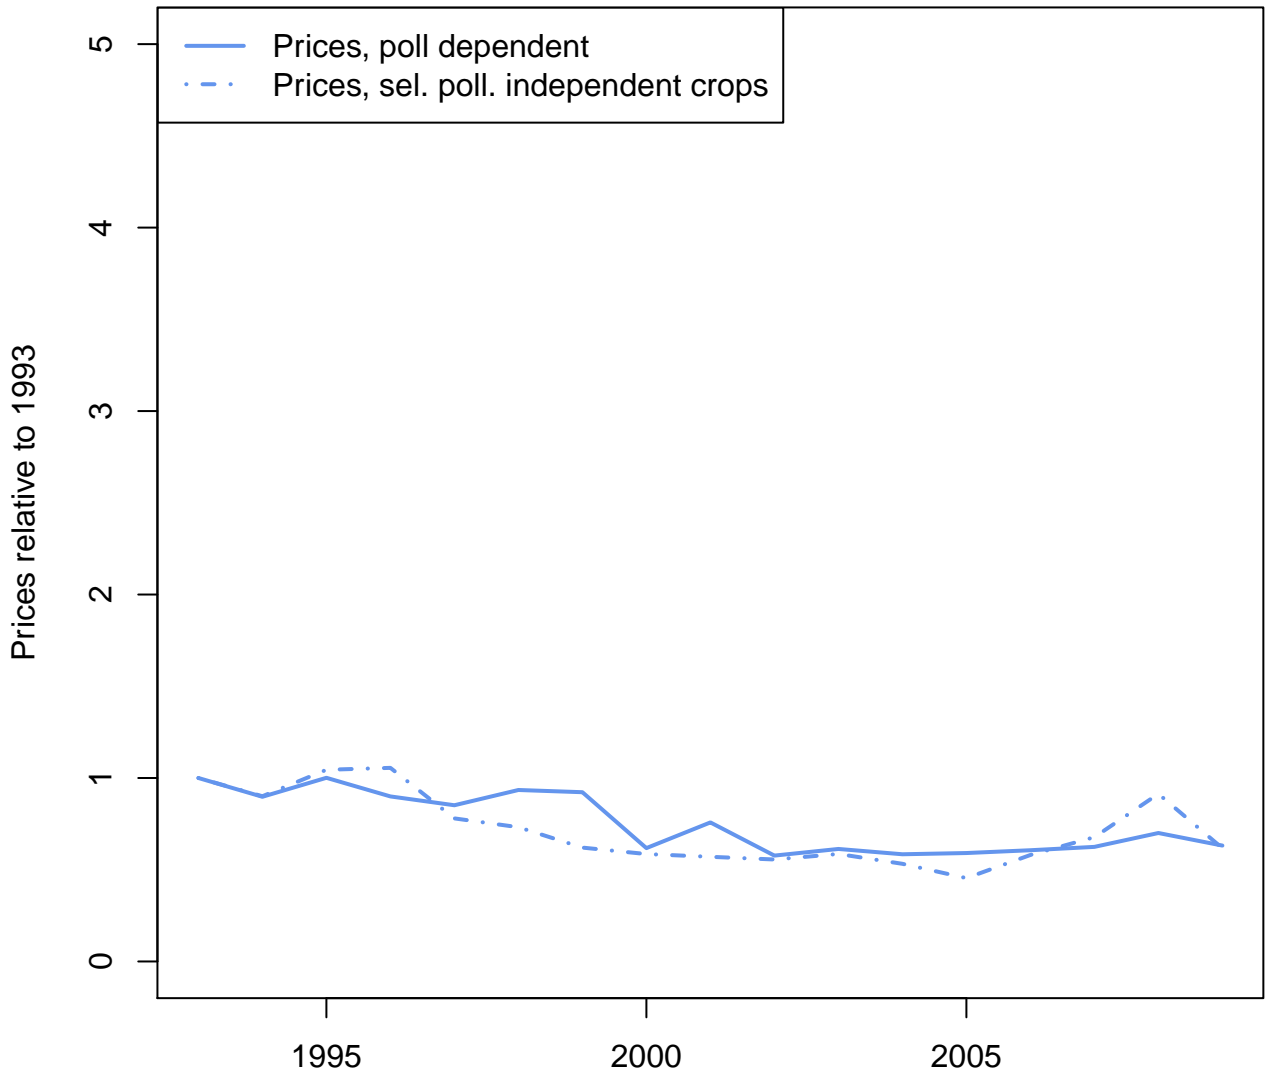

# Mongolia

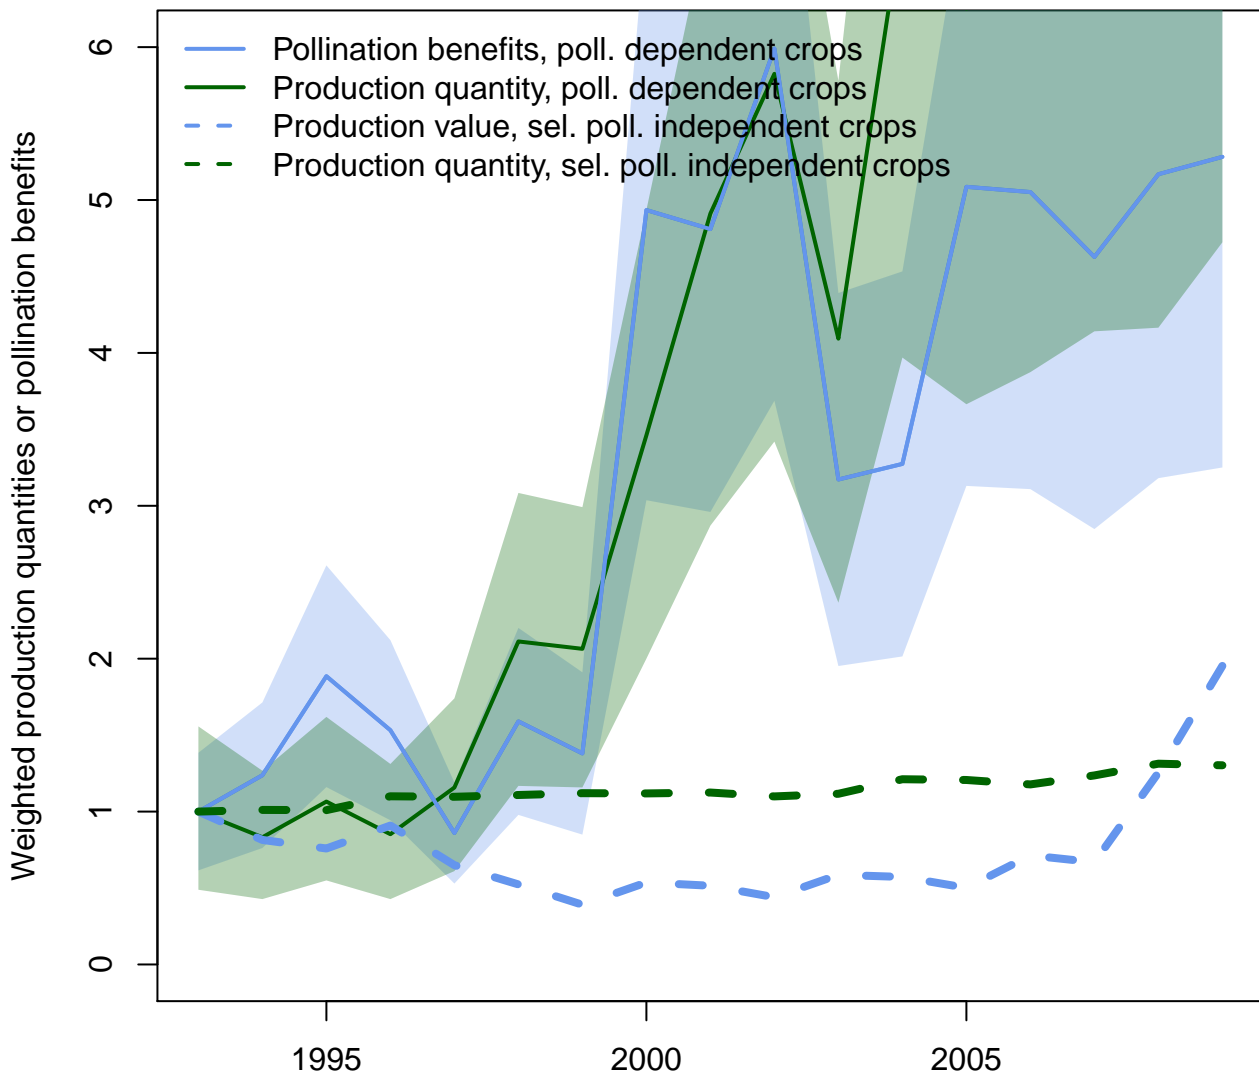



# Mongolia

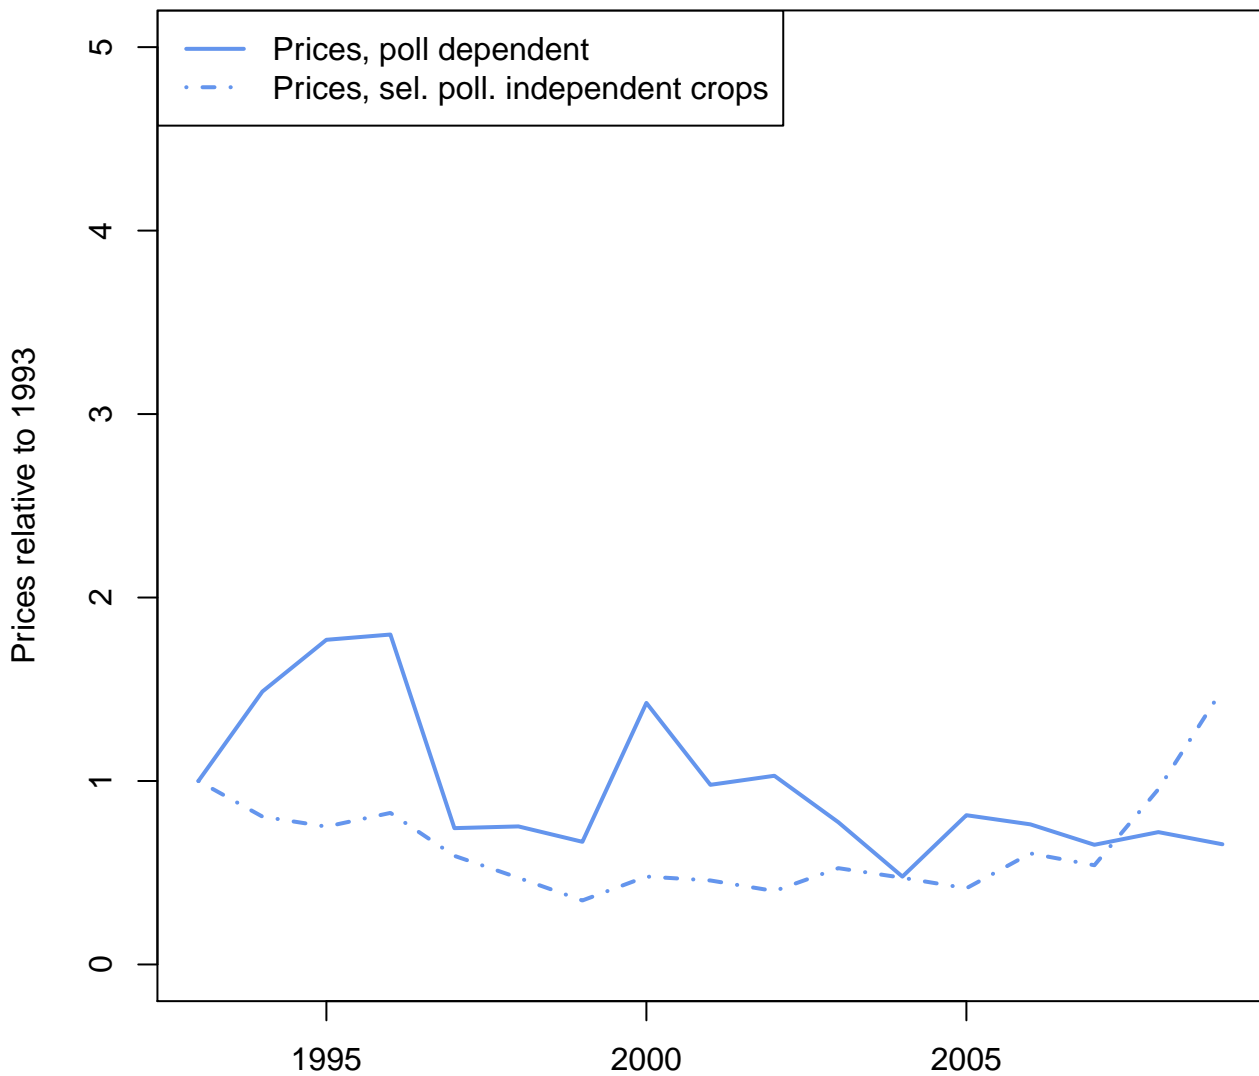

# Morocco

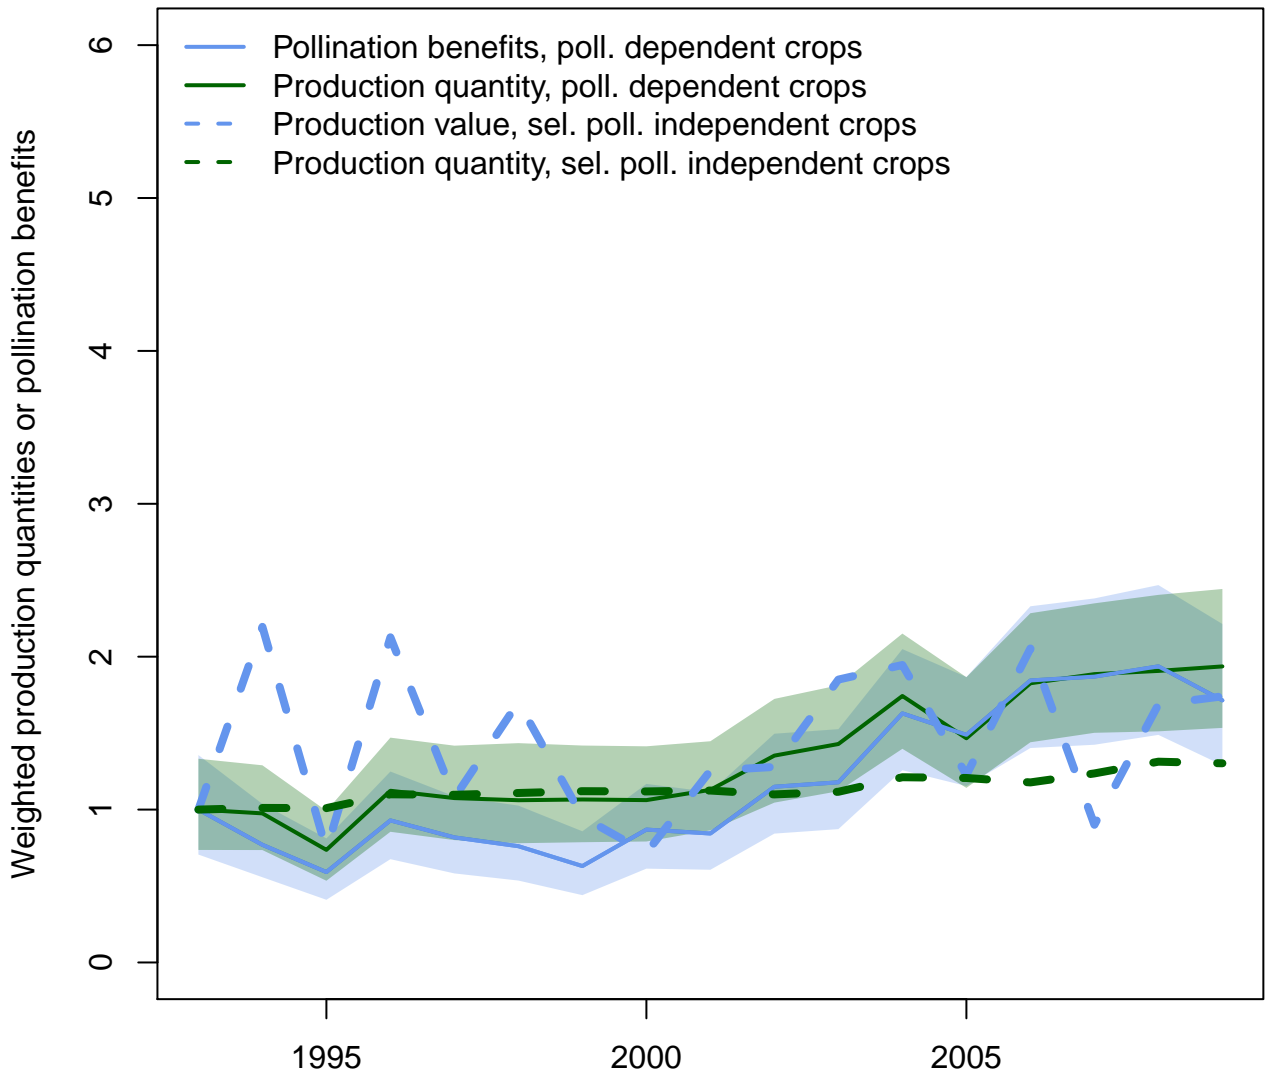

# Morocco

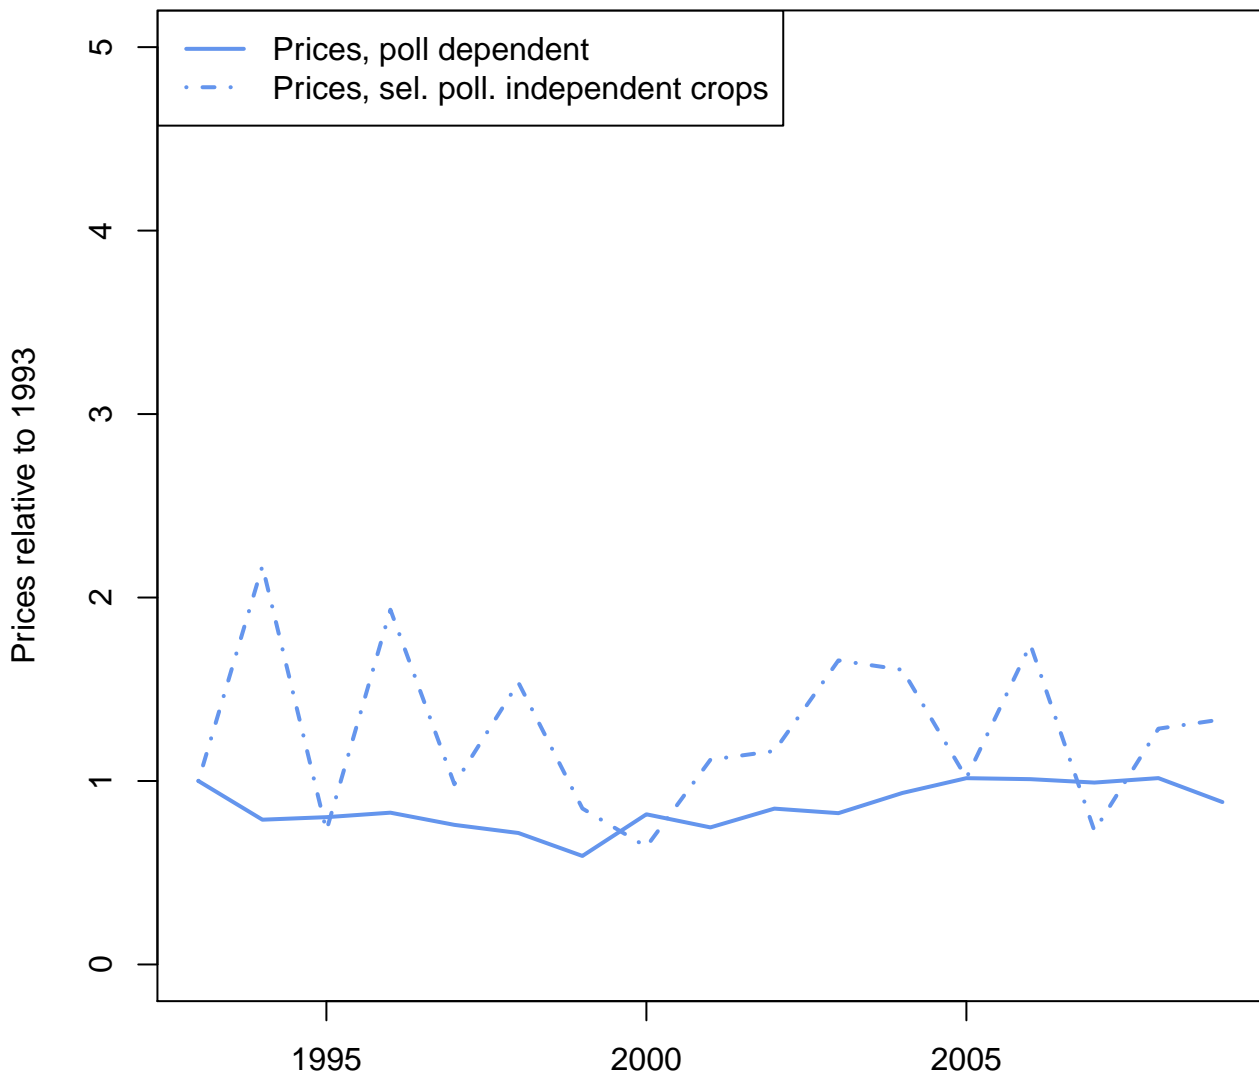

# Mozambique

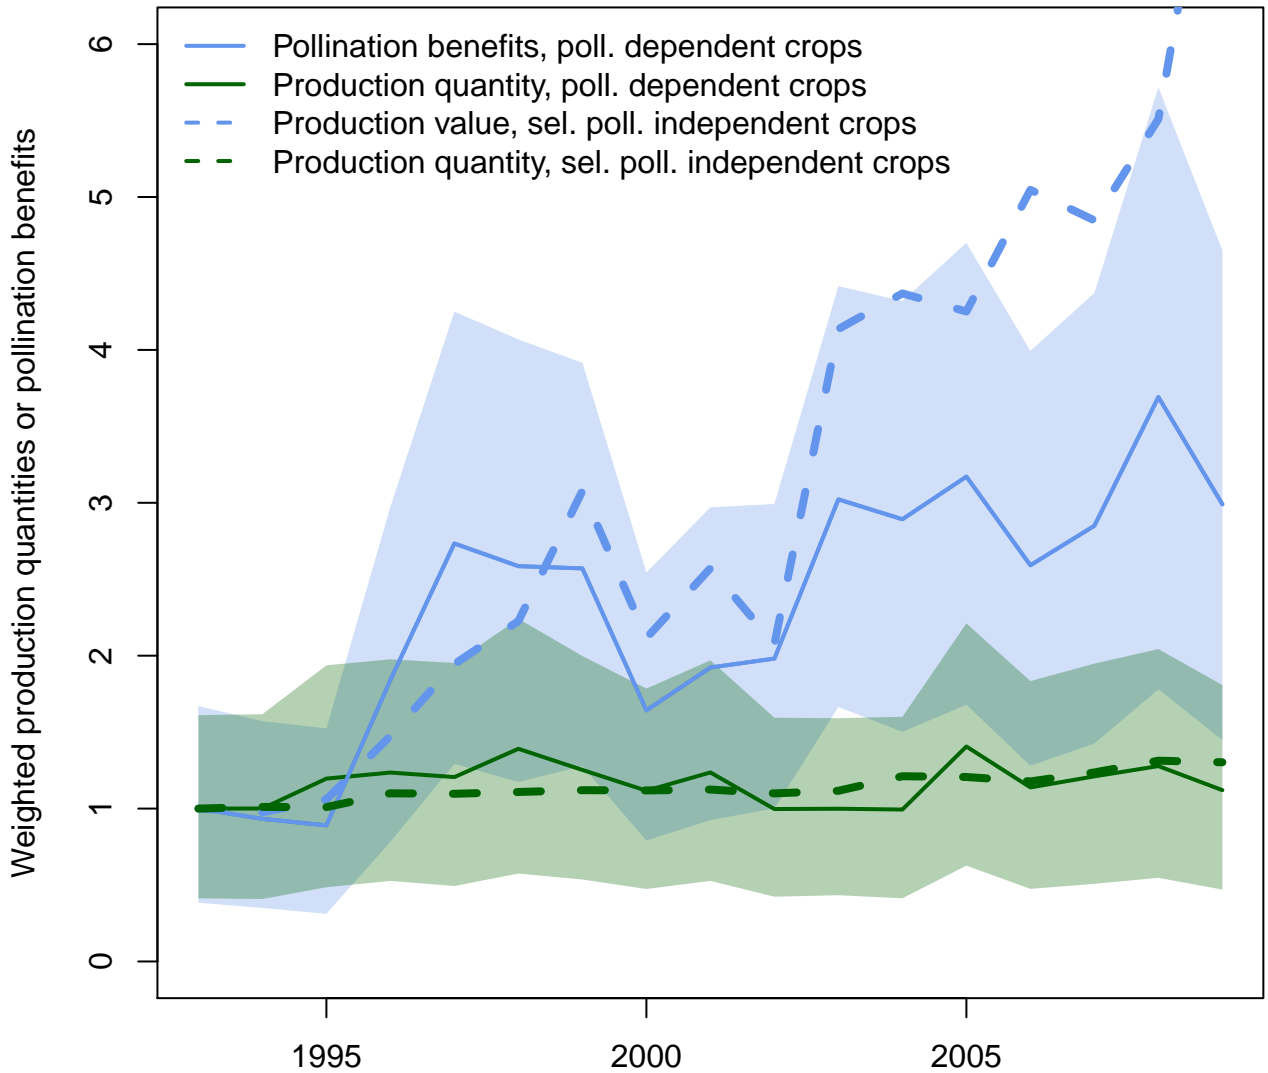

# Mozambique

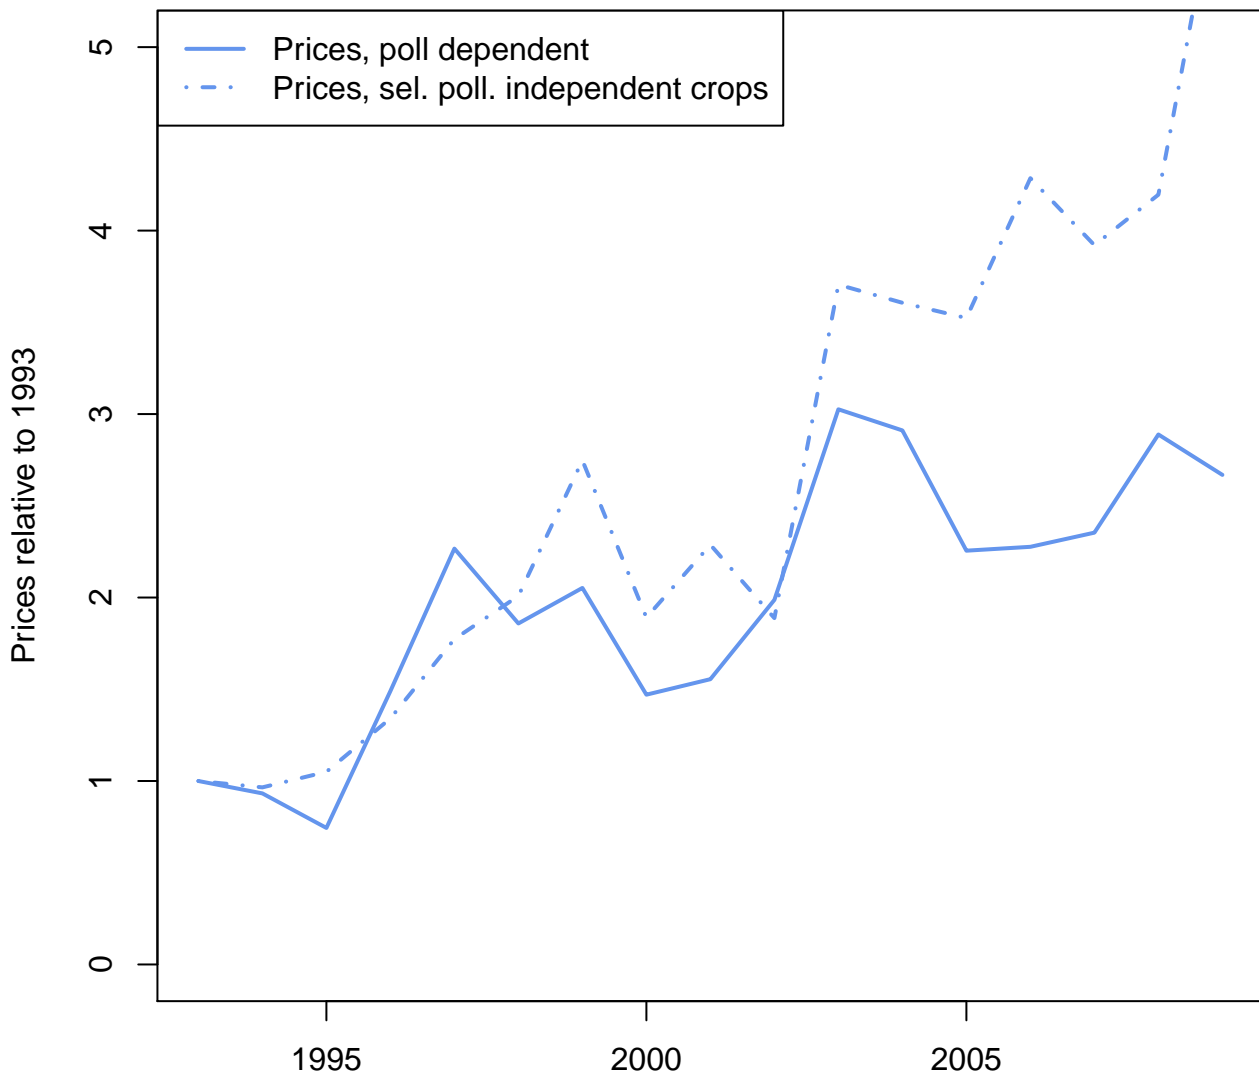

# Namibia

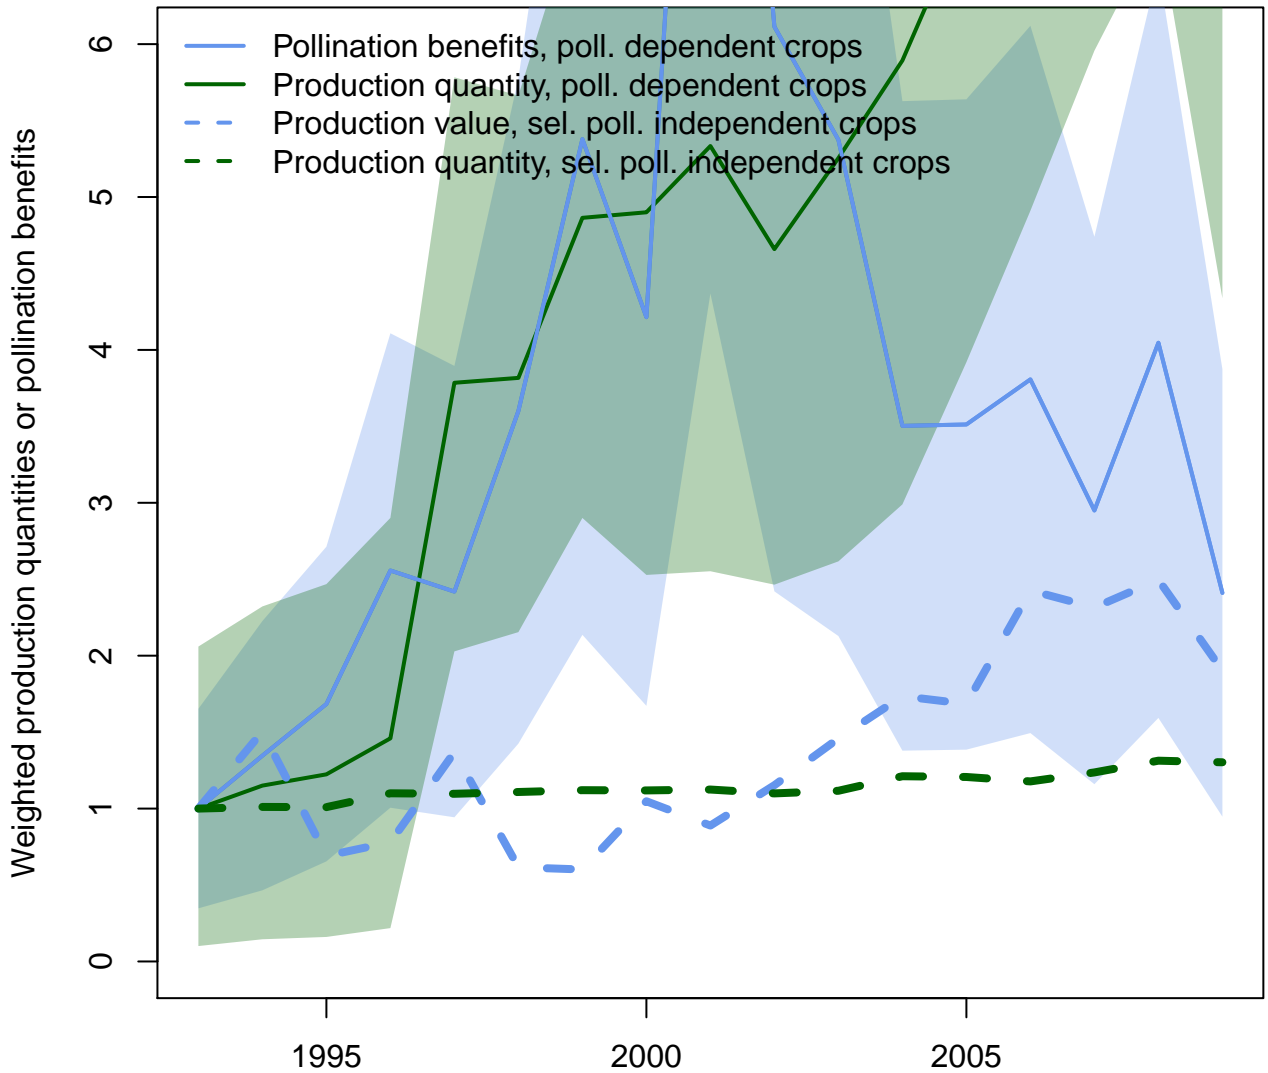

# Namibia

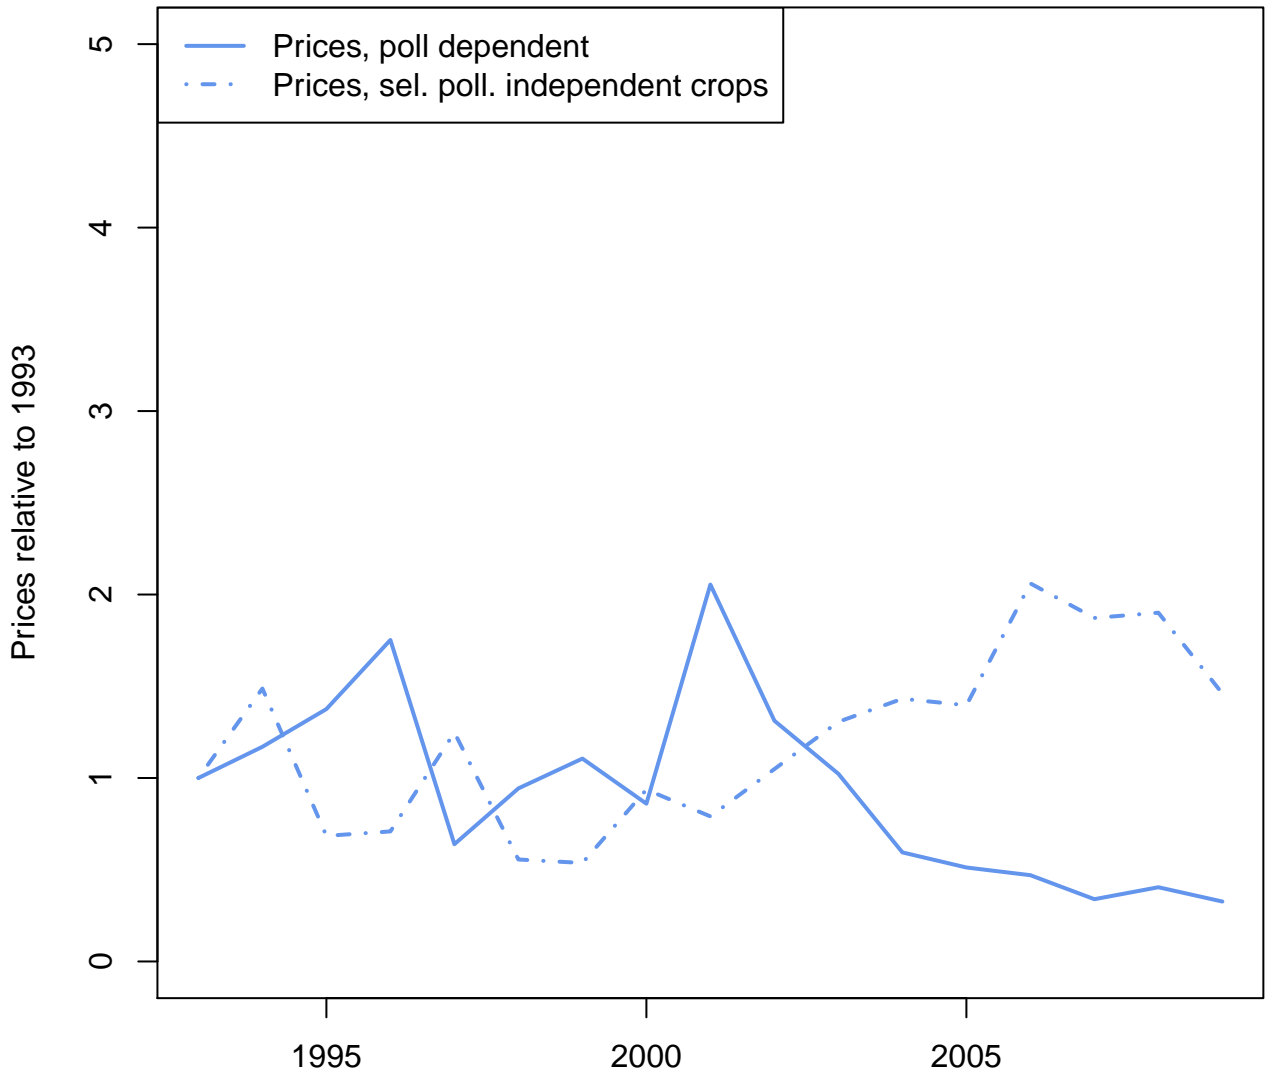

# Nepal

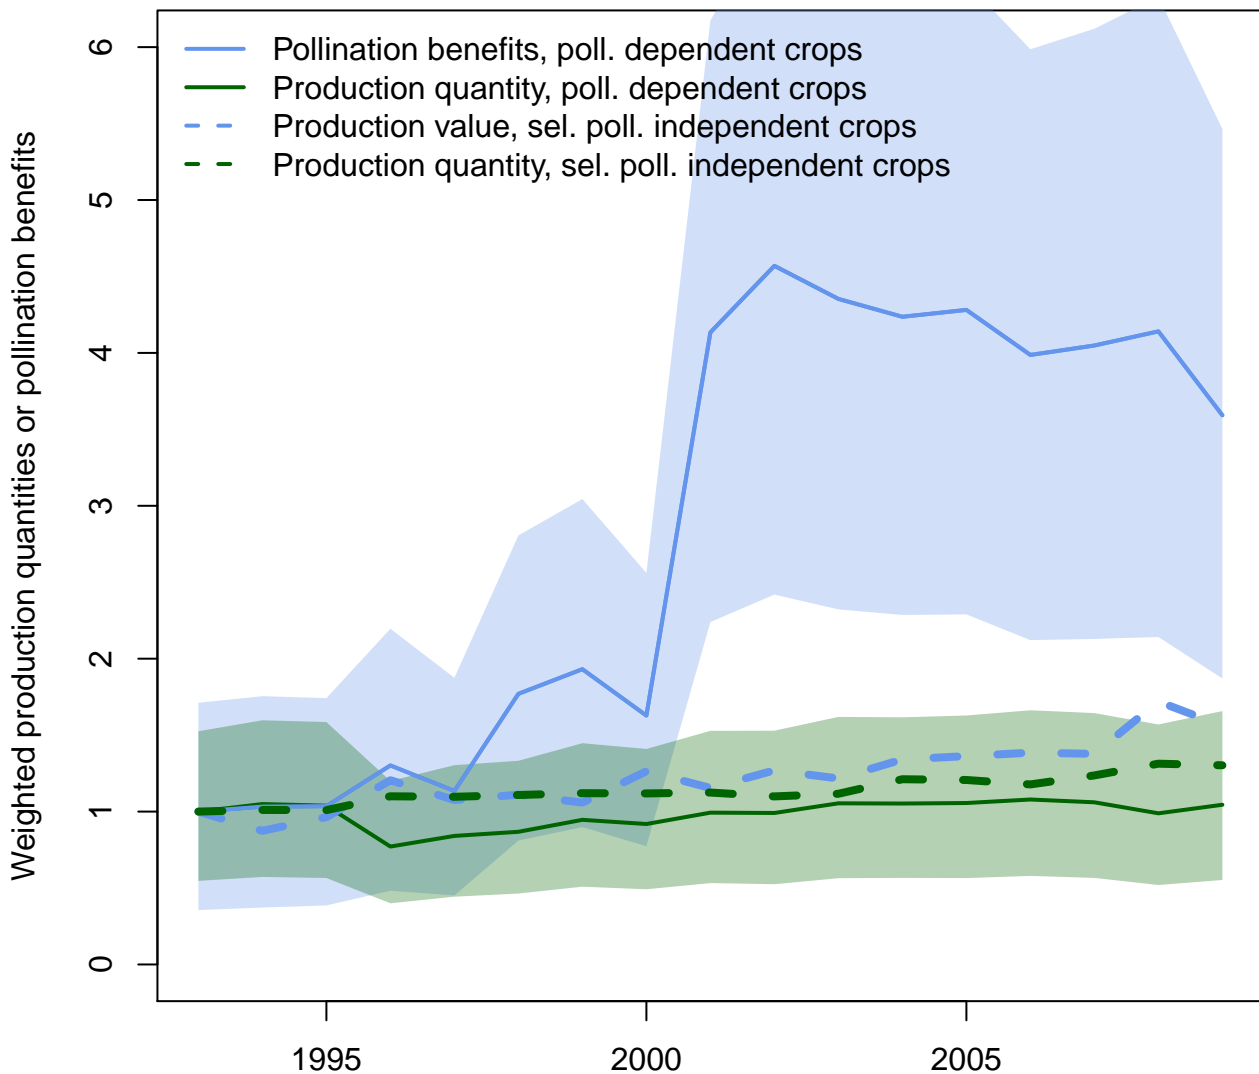



# Nepal

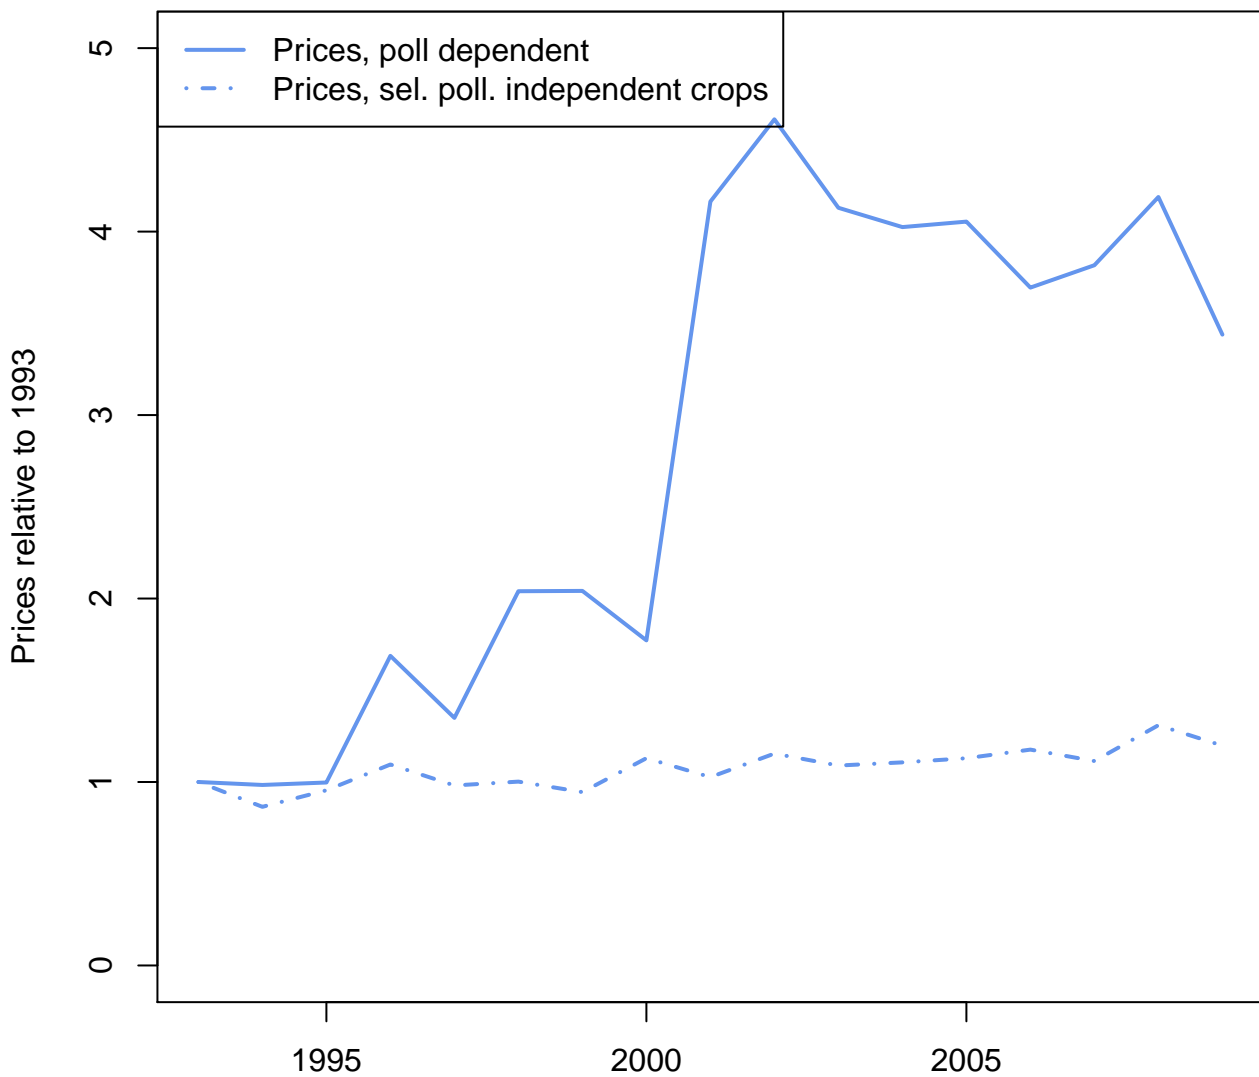

# Netherlands

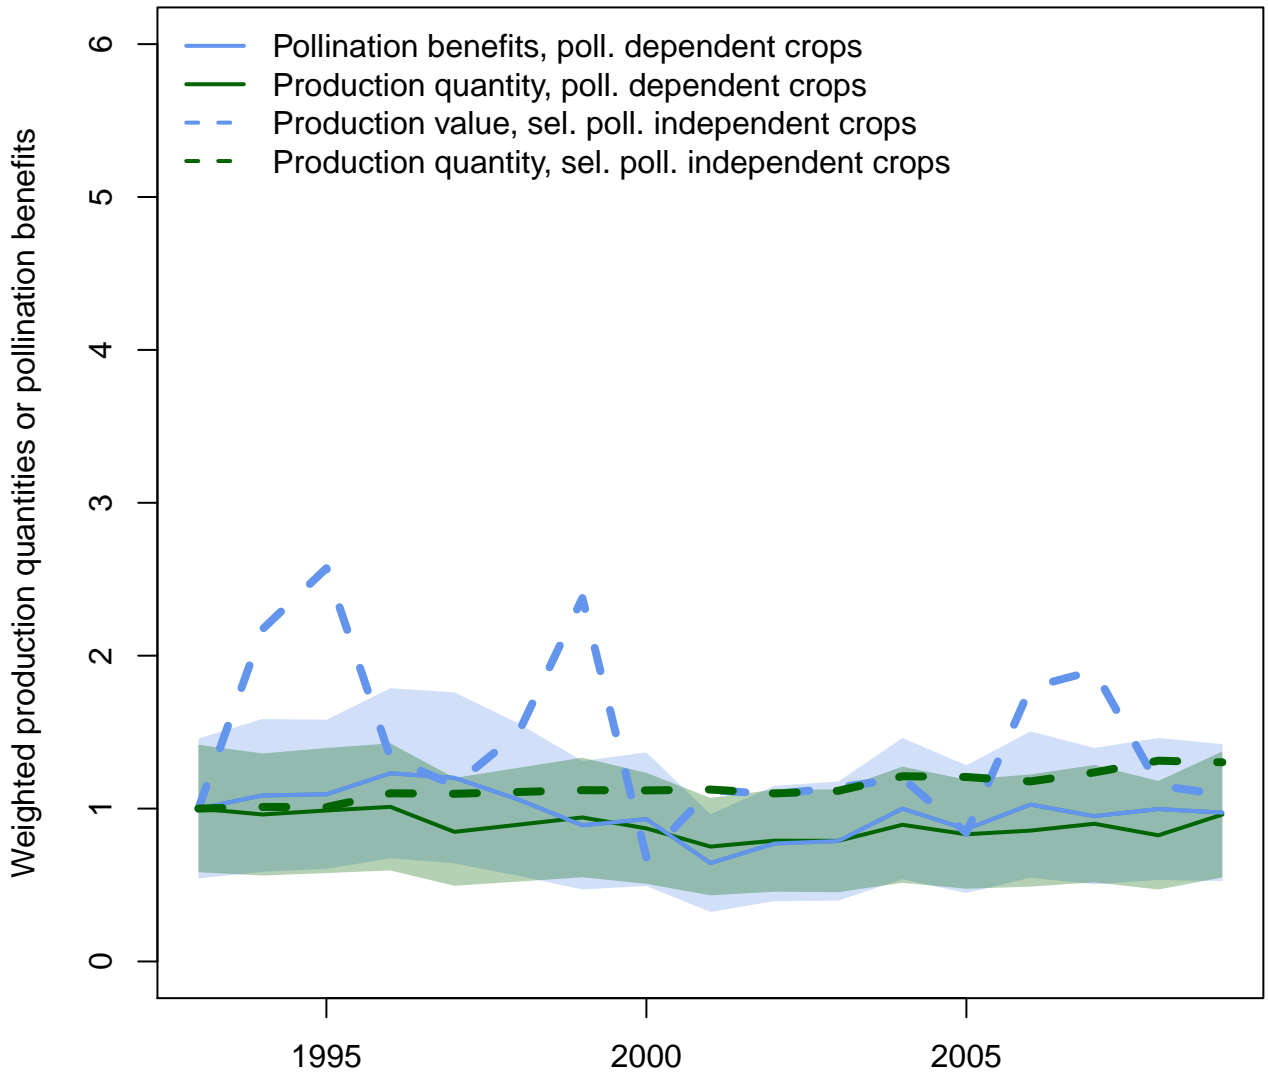

# Netherlands

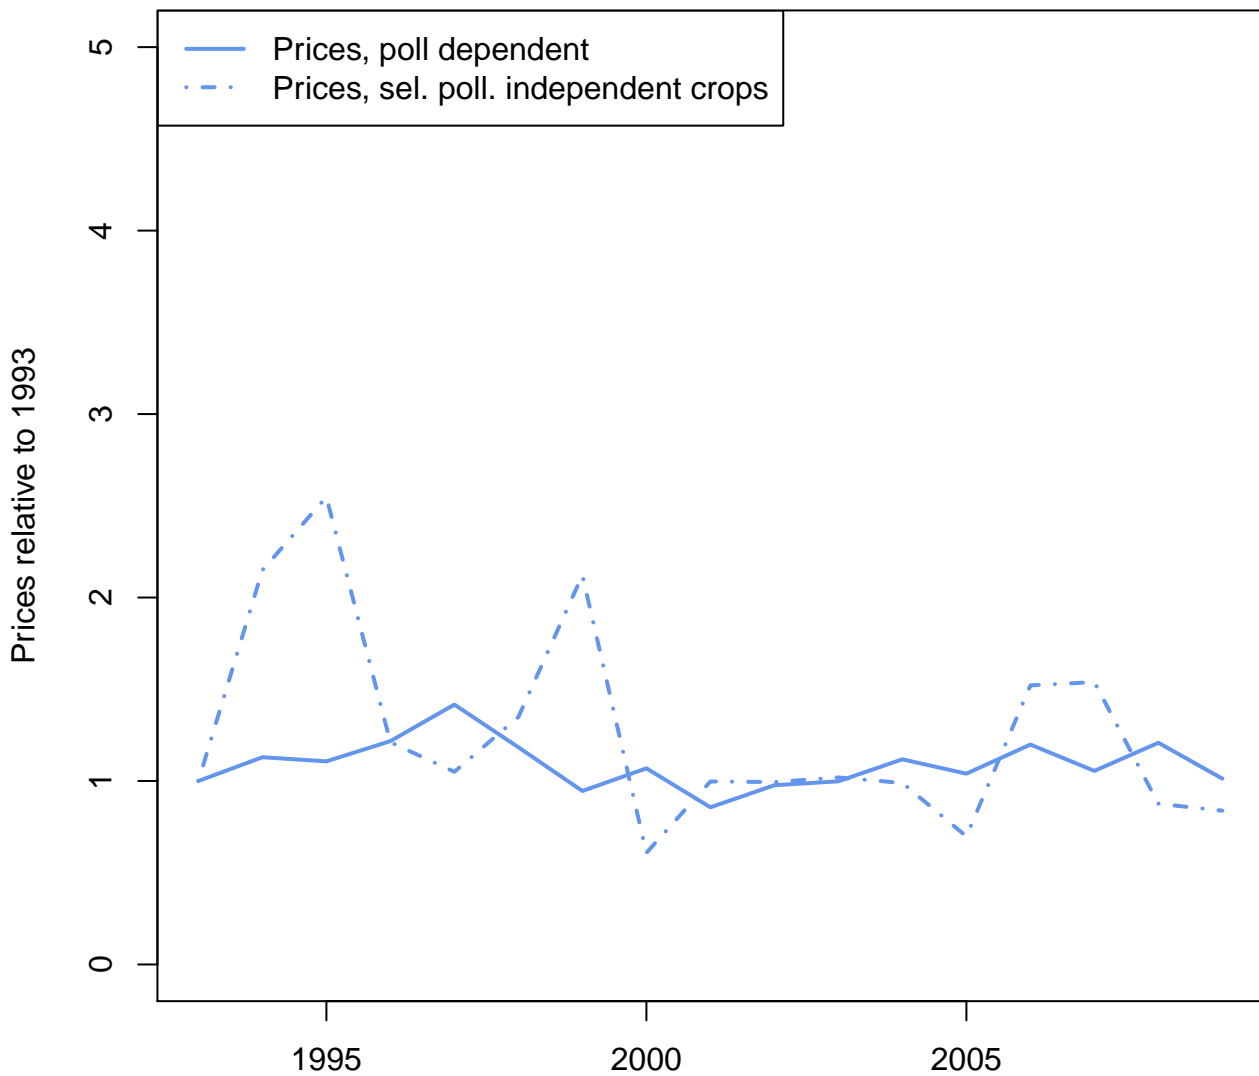

## New Zealand

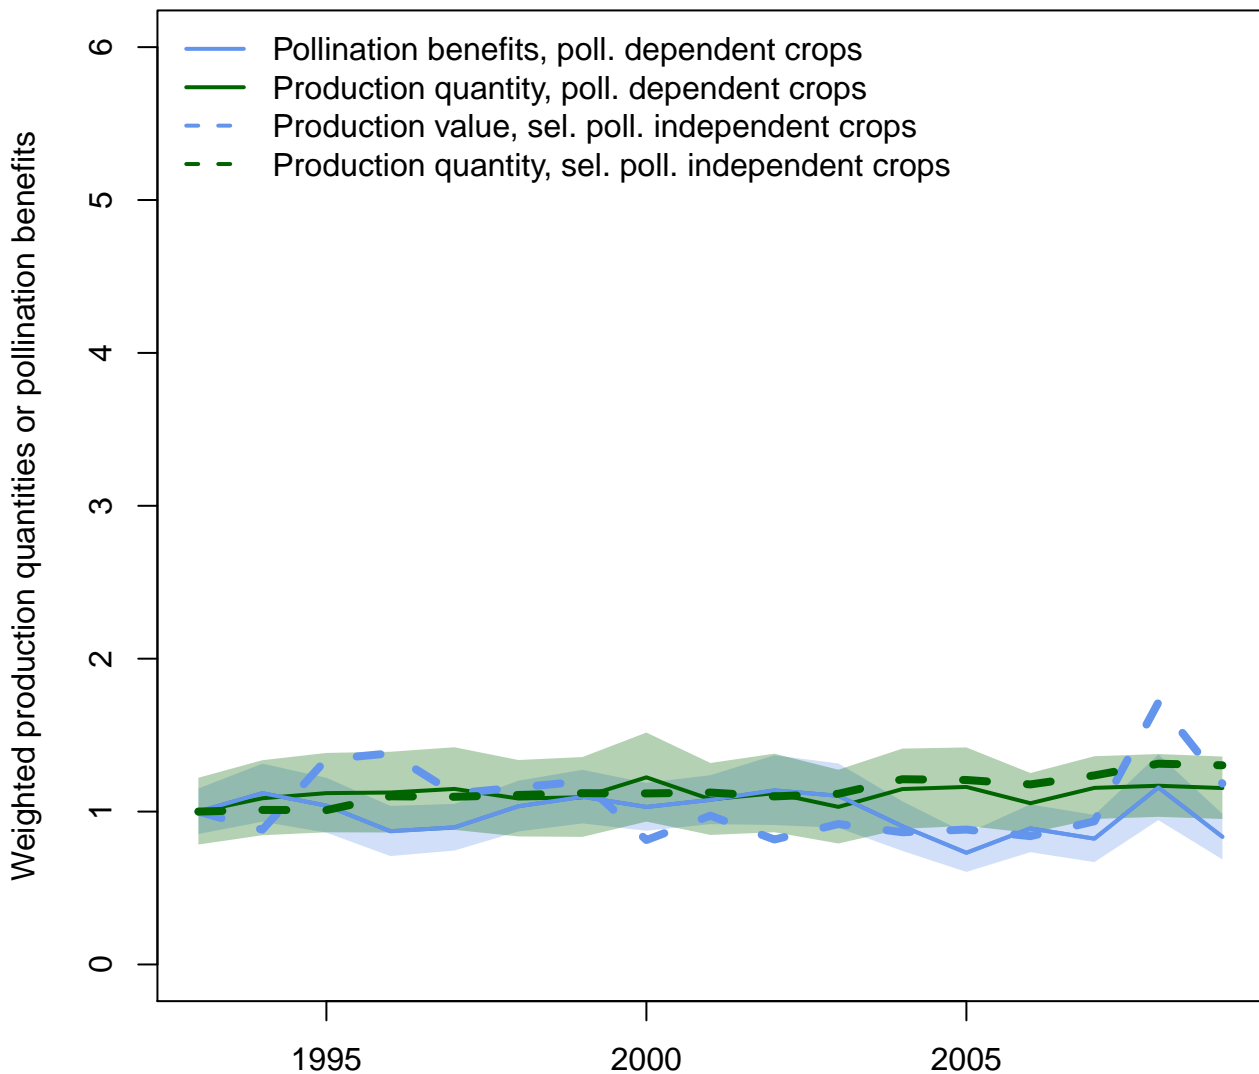

# New Zealand

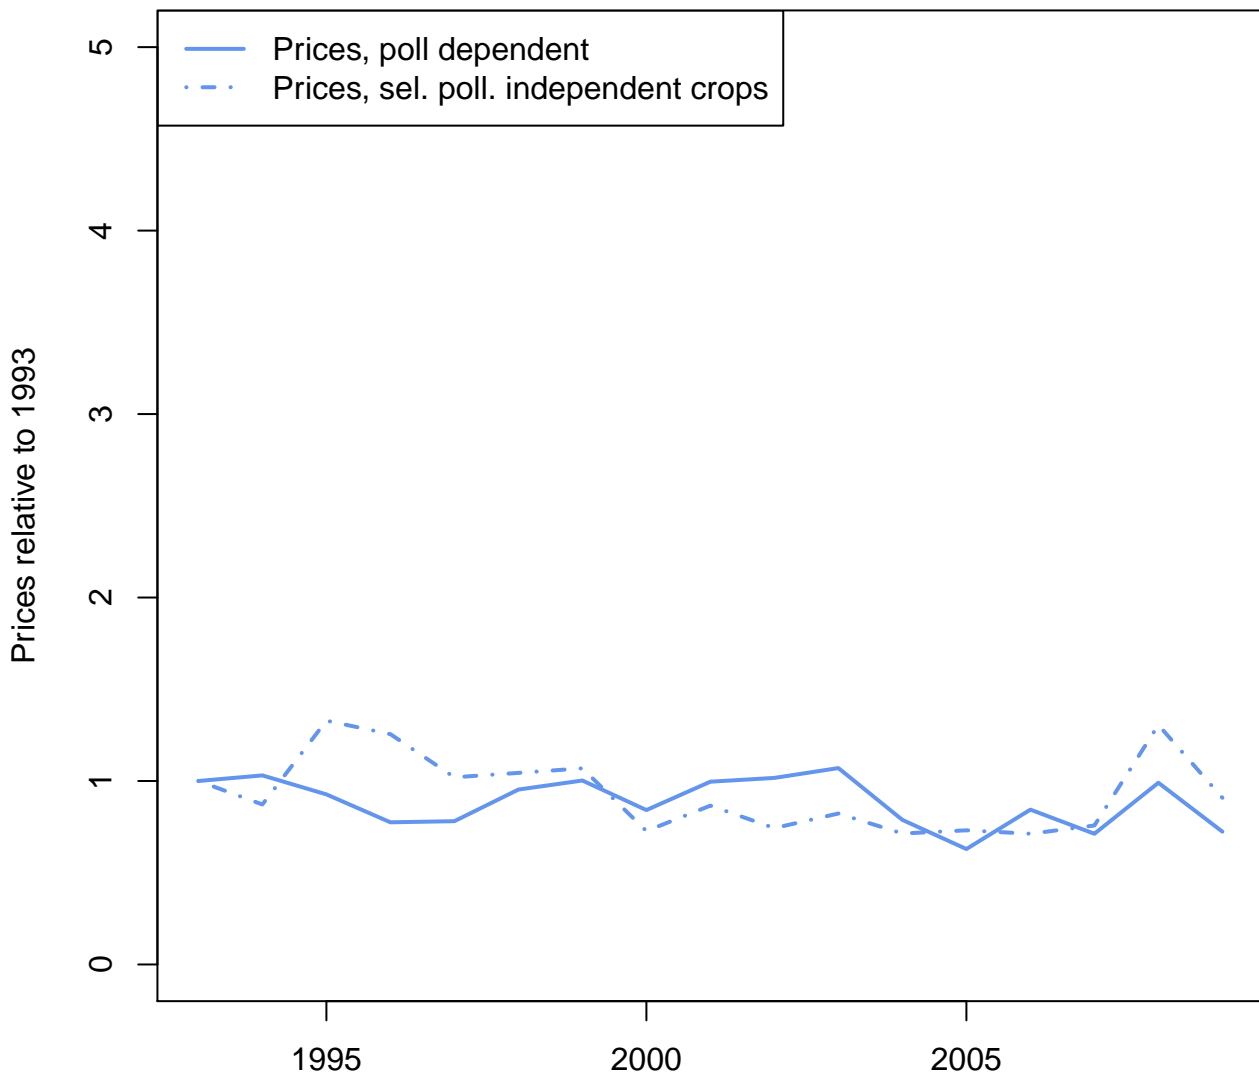

# Nicaragua

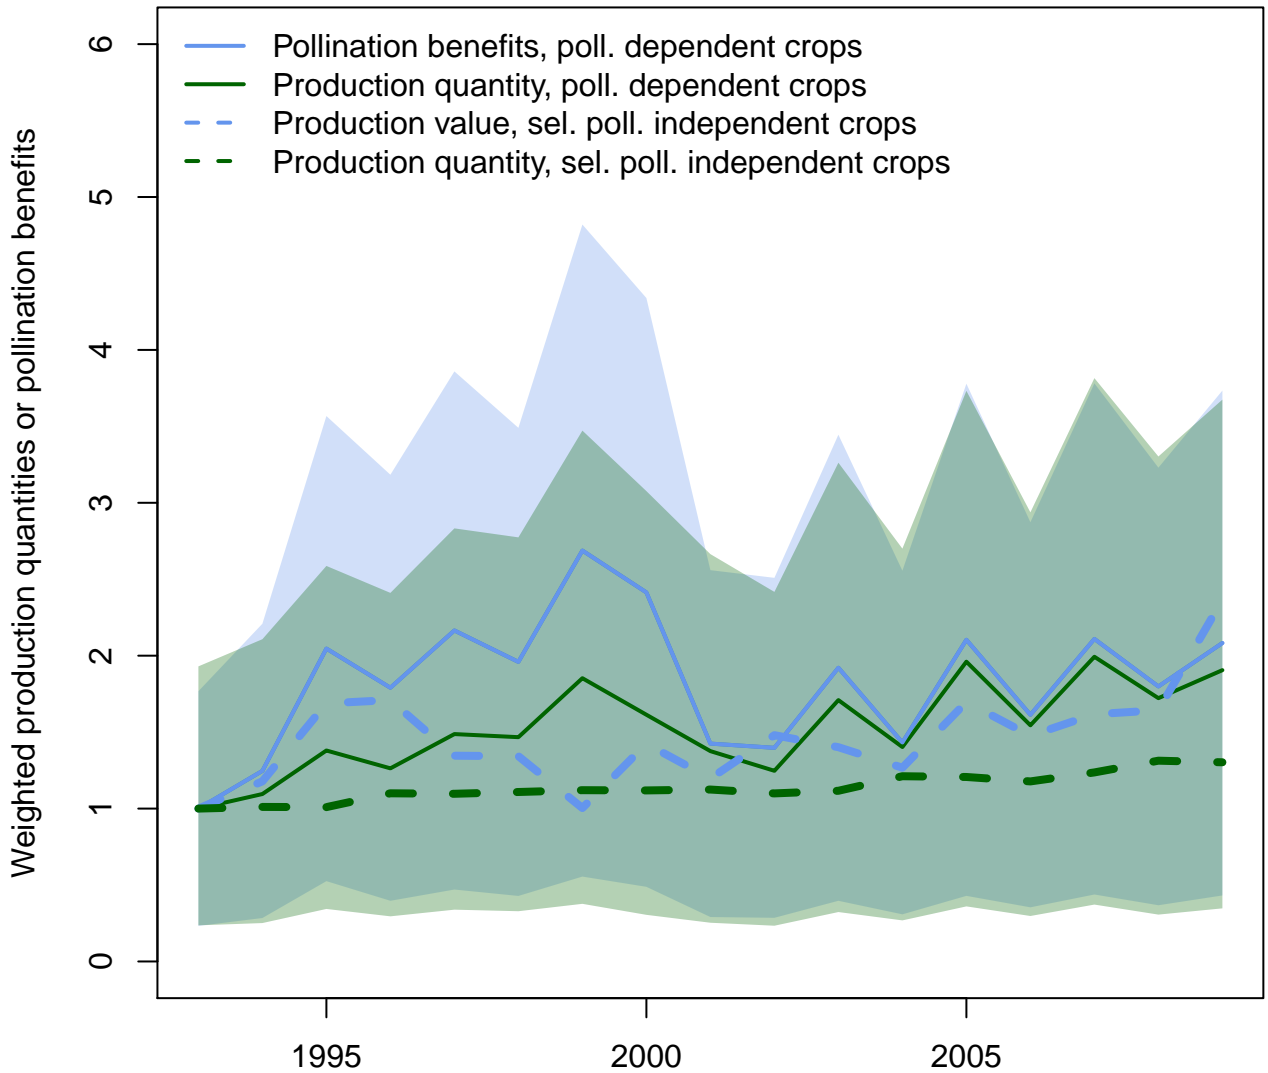

# Nicaragua

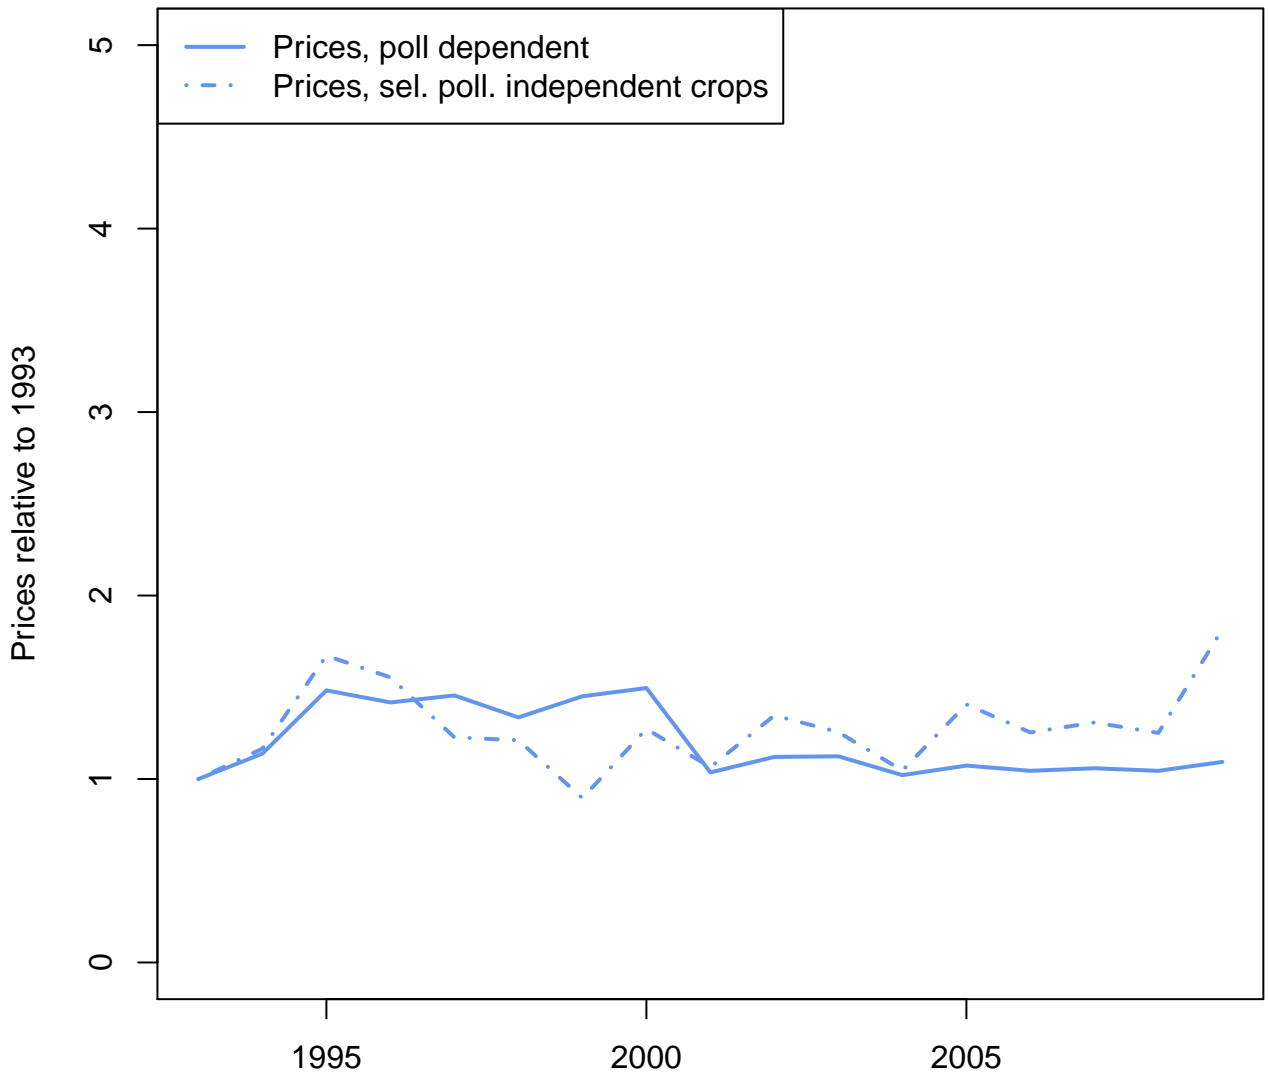

# Niger

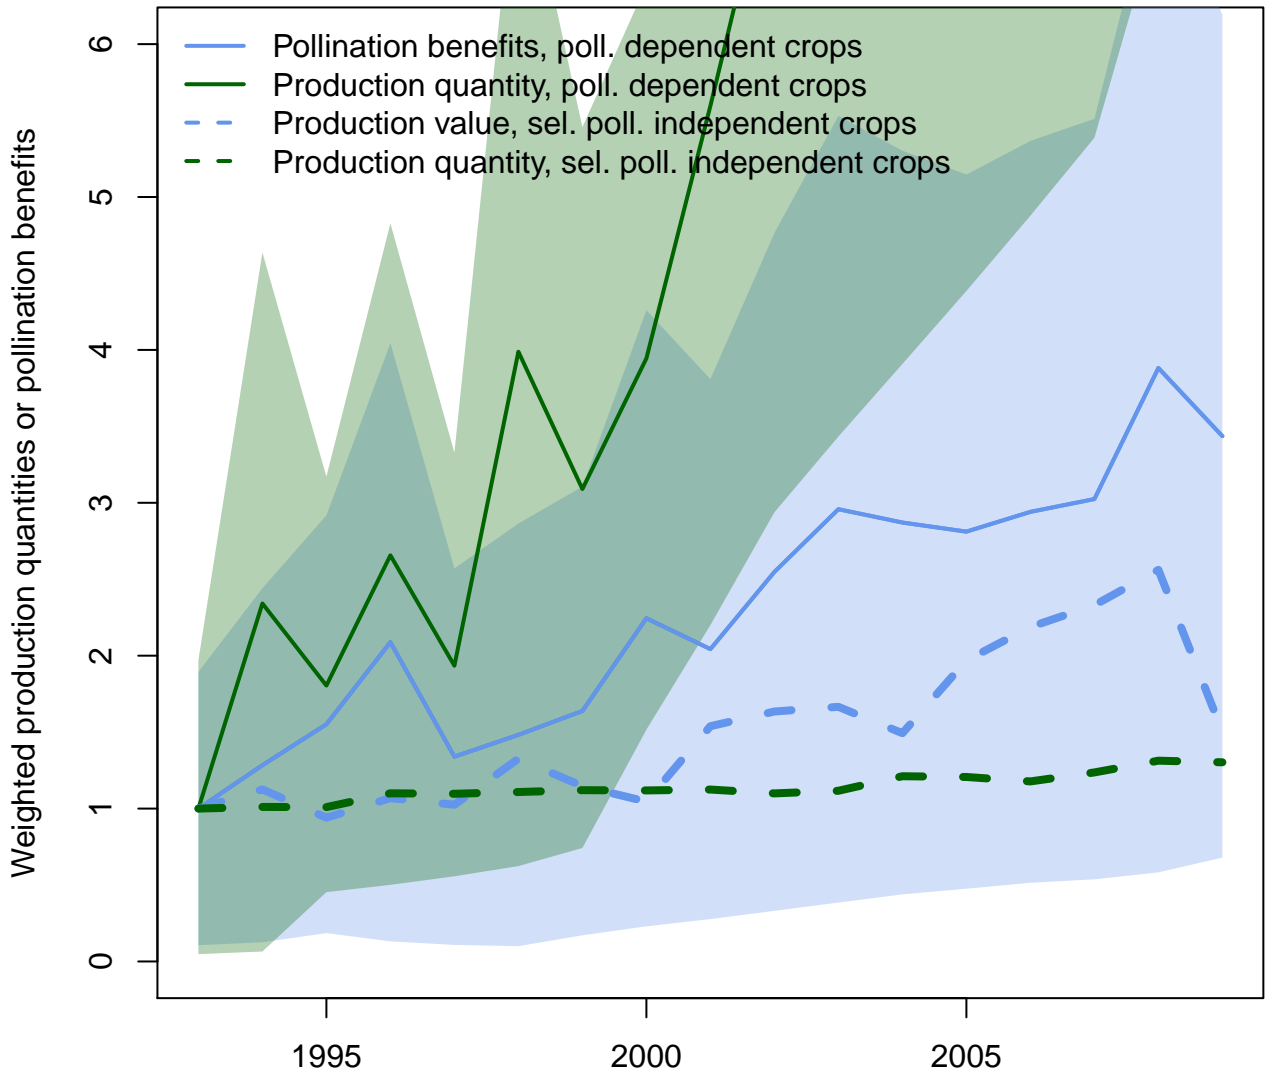



# Niger

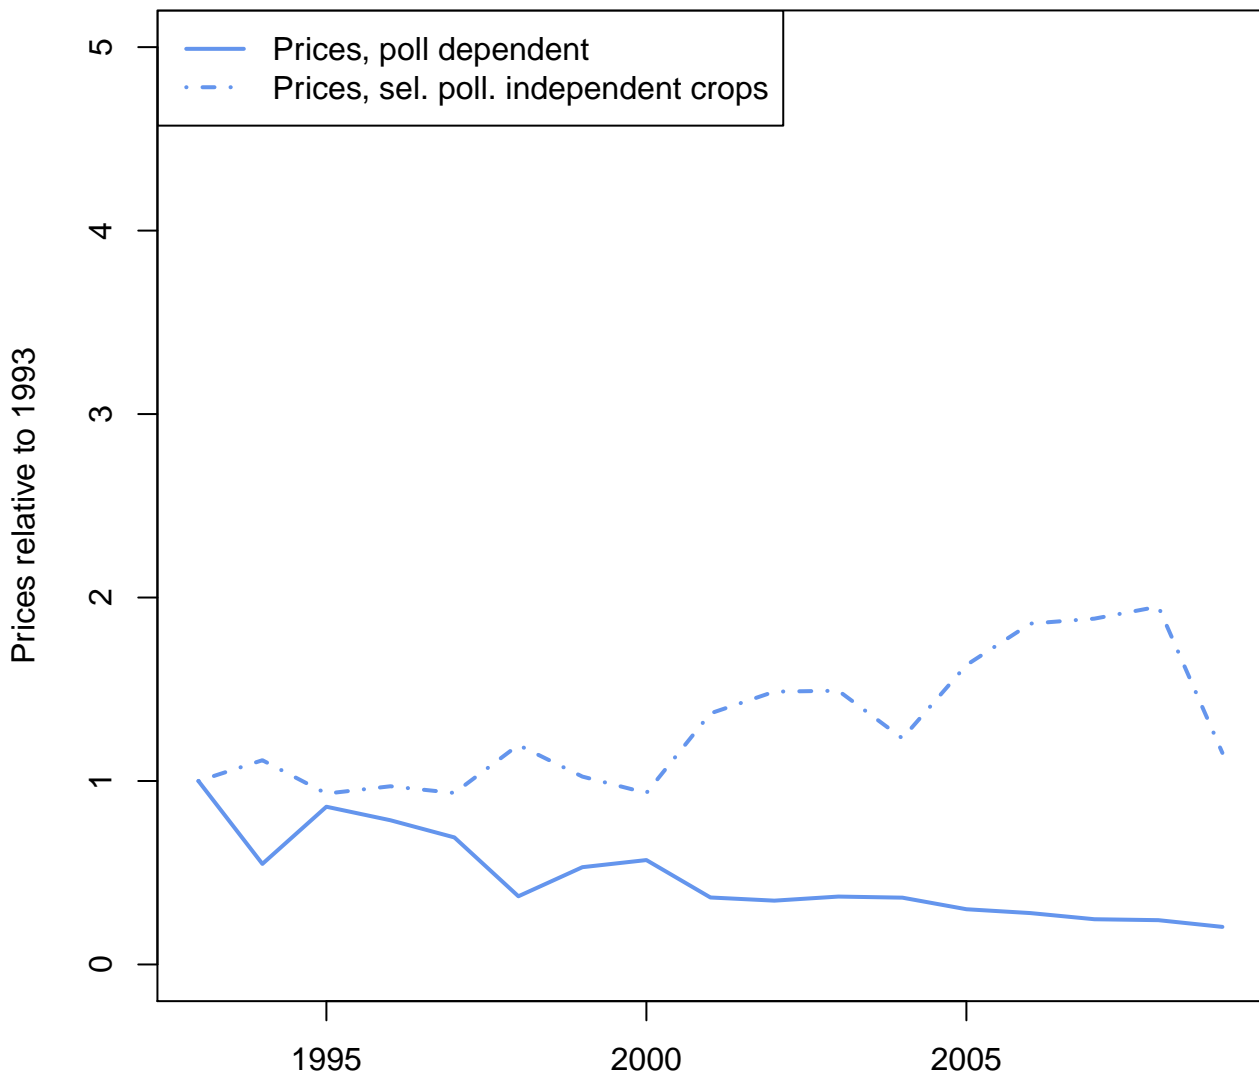

# Nigeria

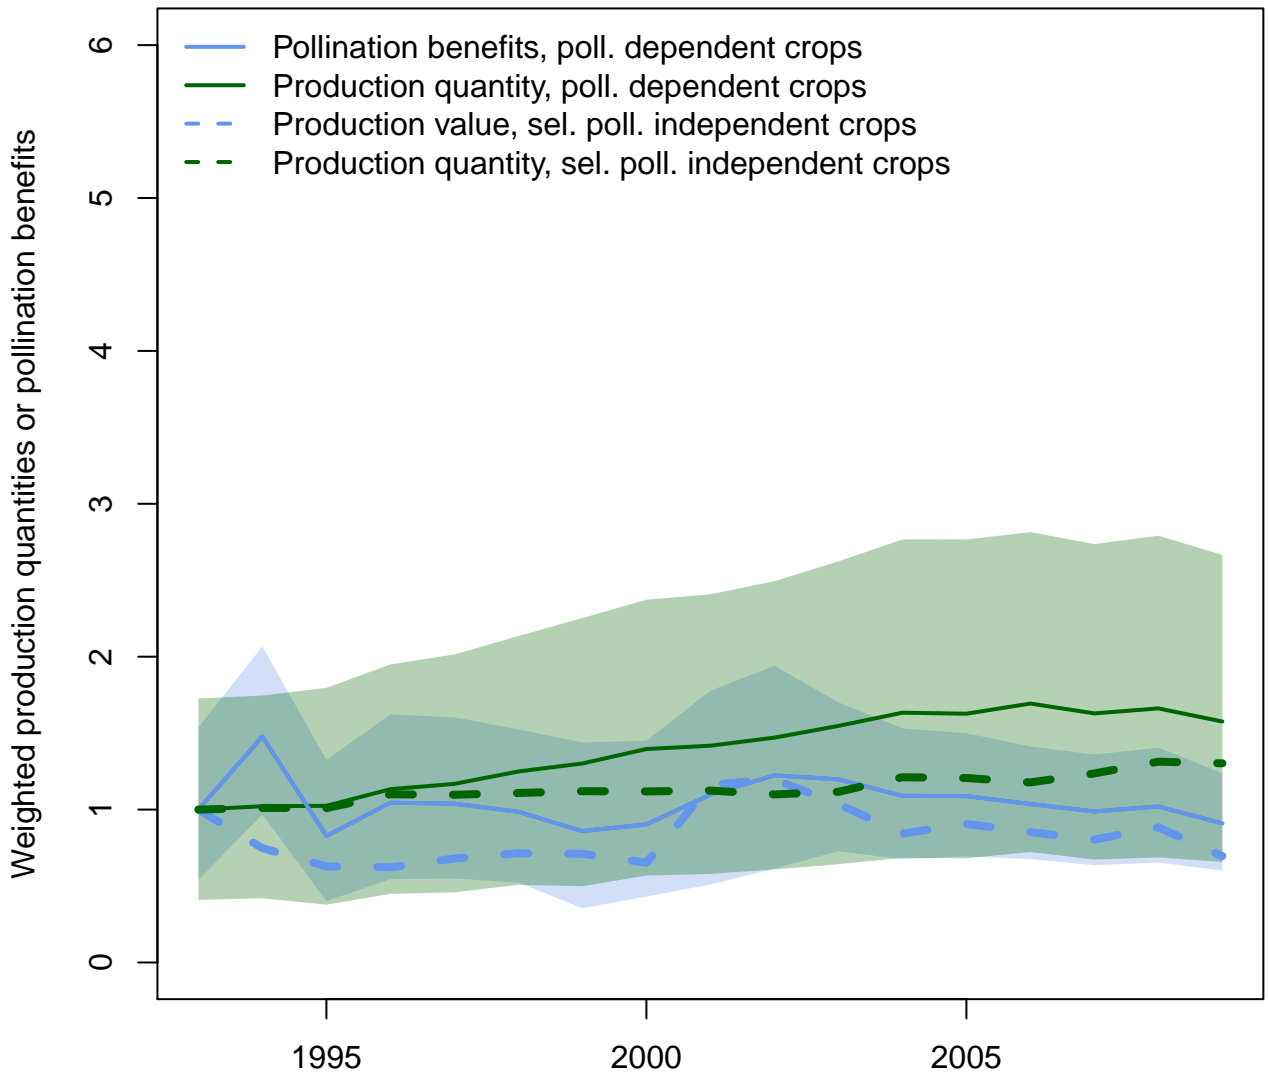

# Nigeria

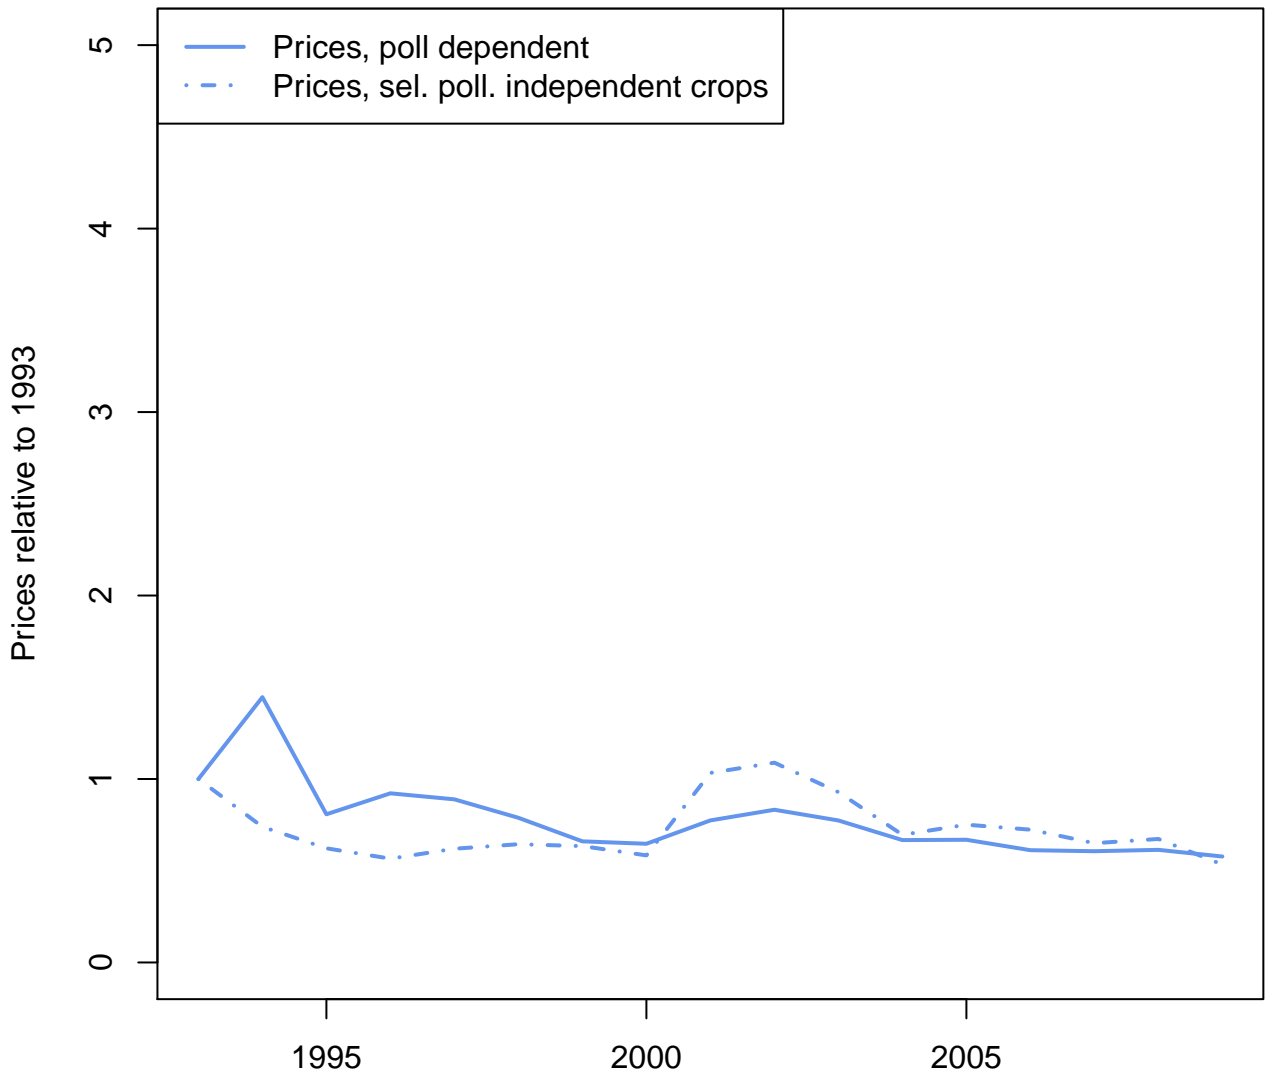

# Norway

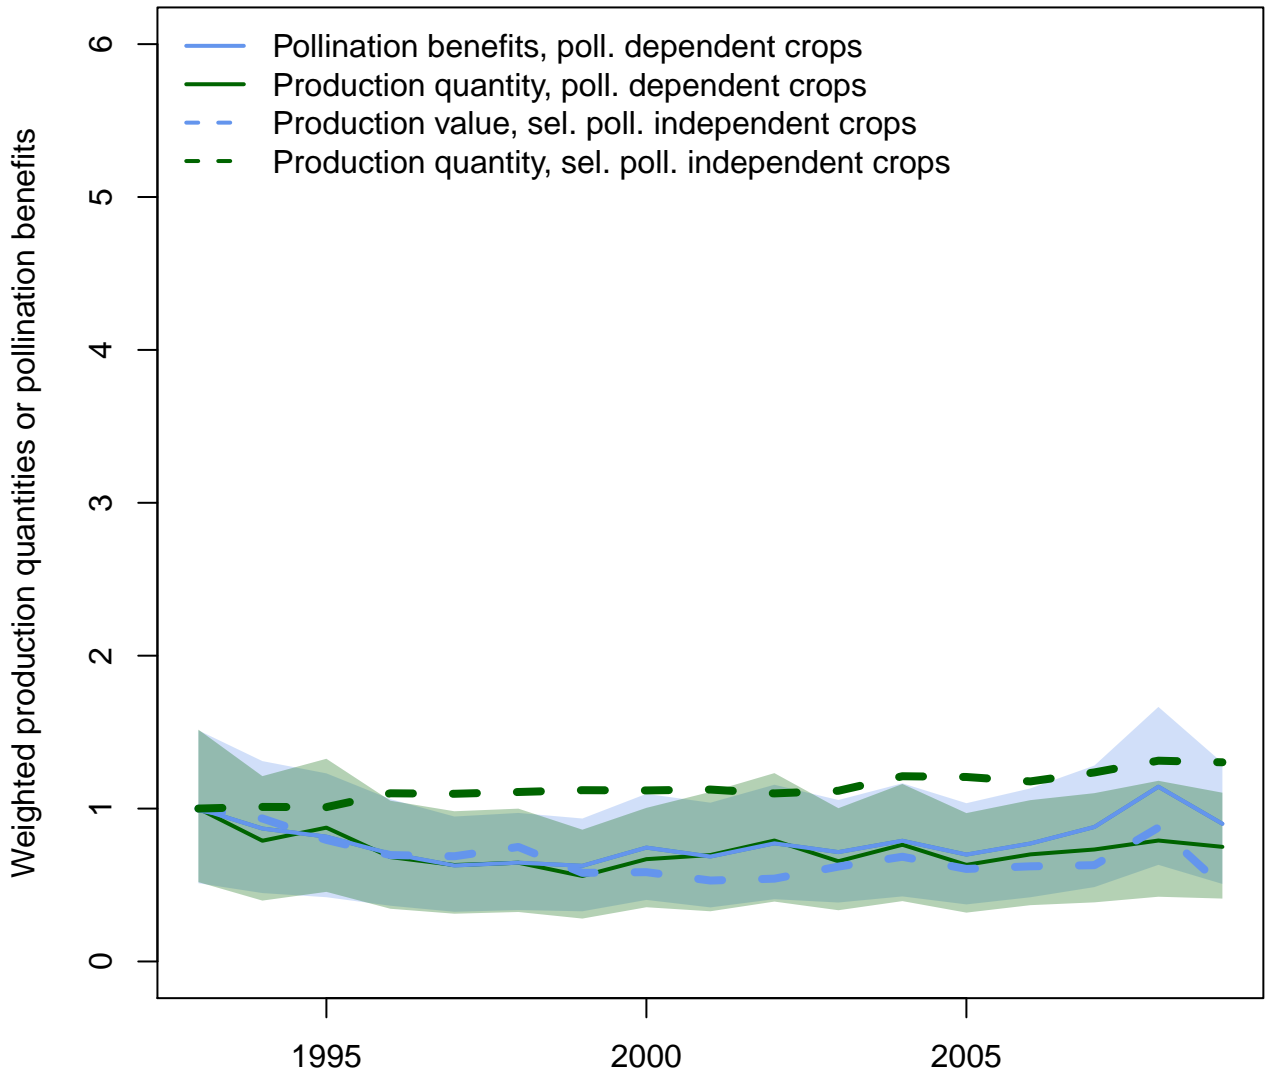

# Norway

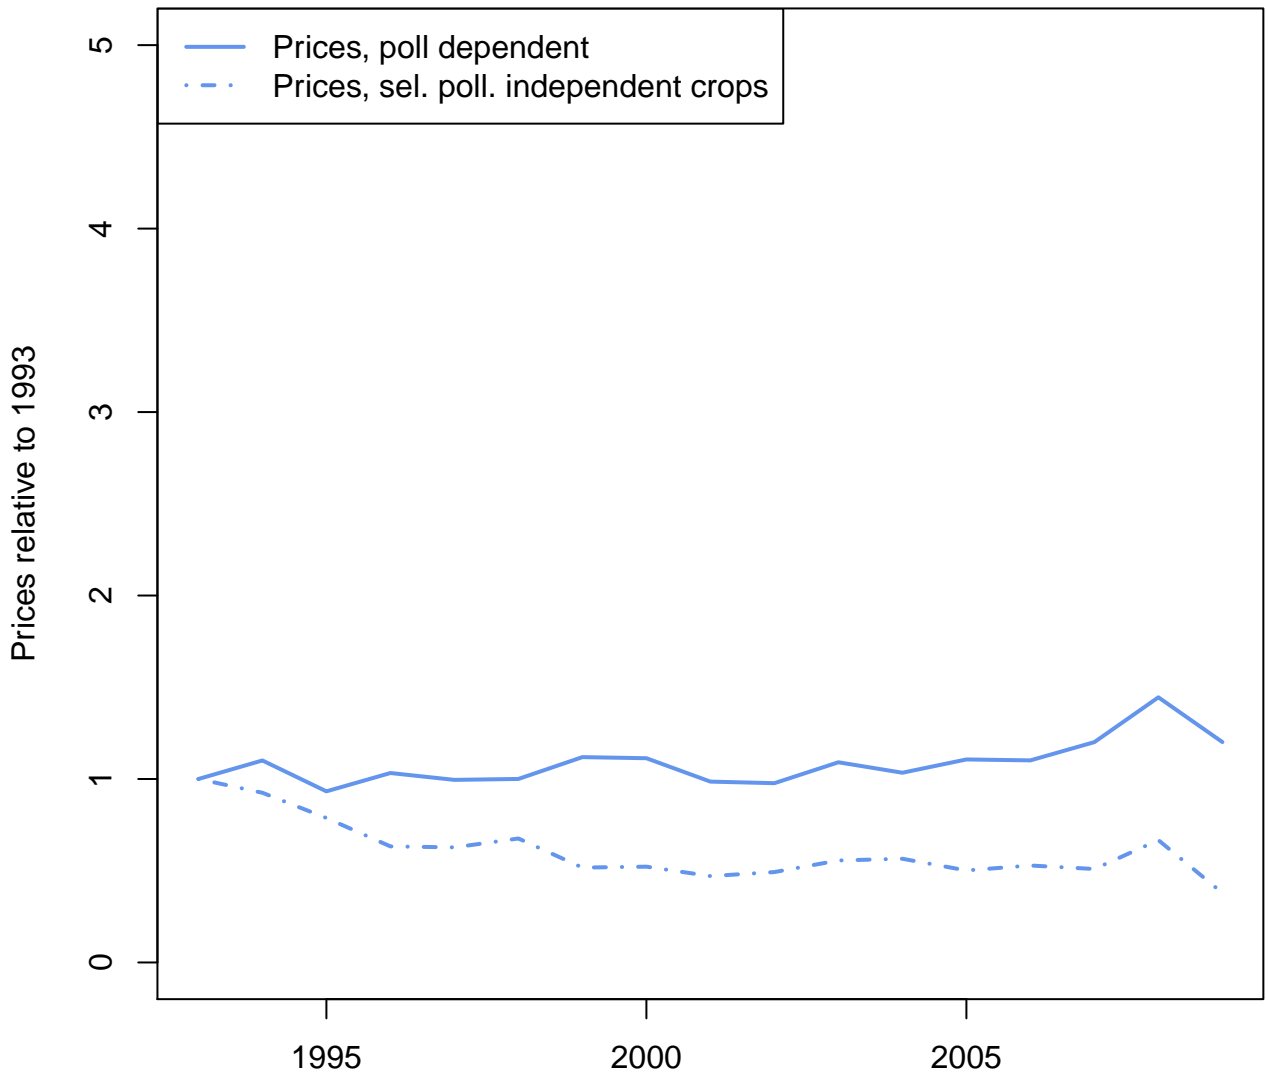

# Pakistan

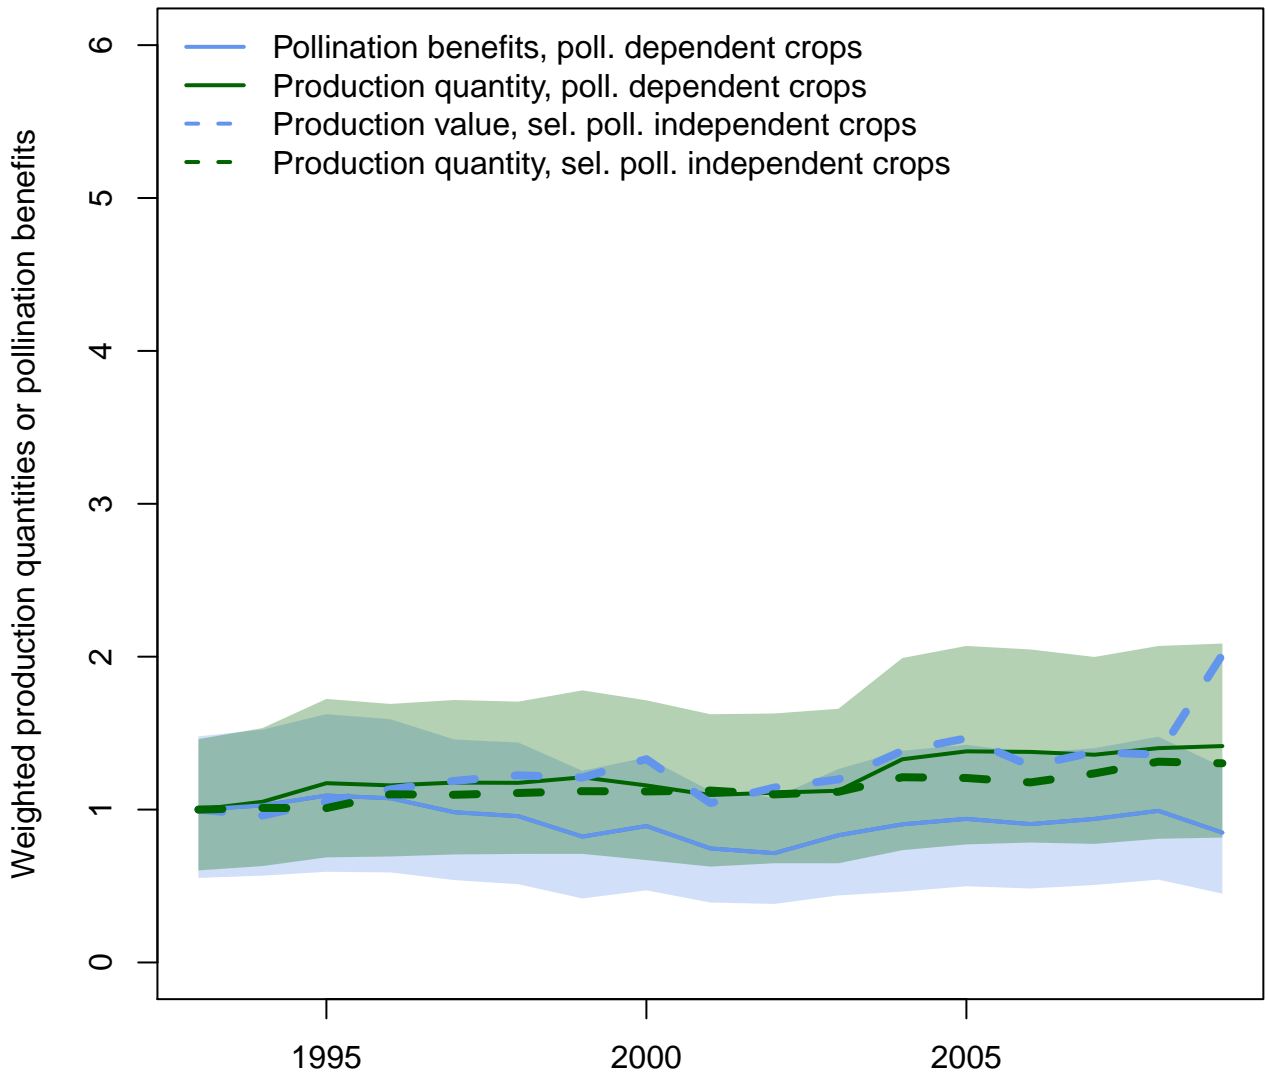

# Pakistan

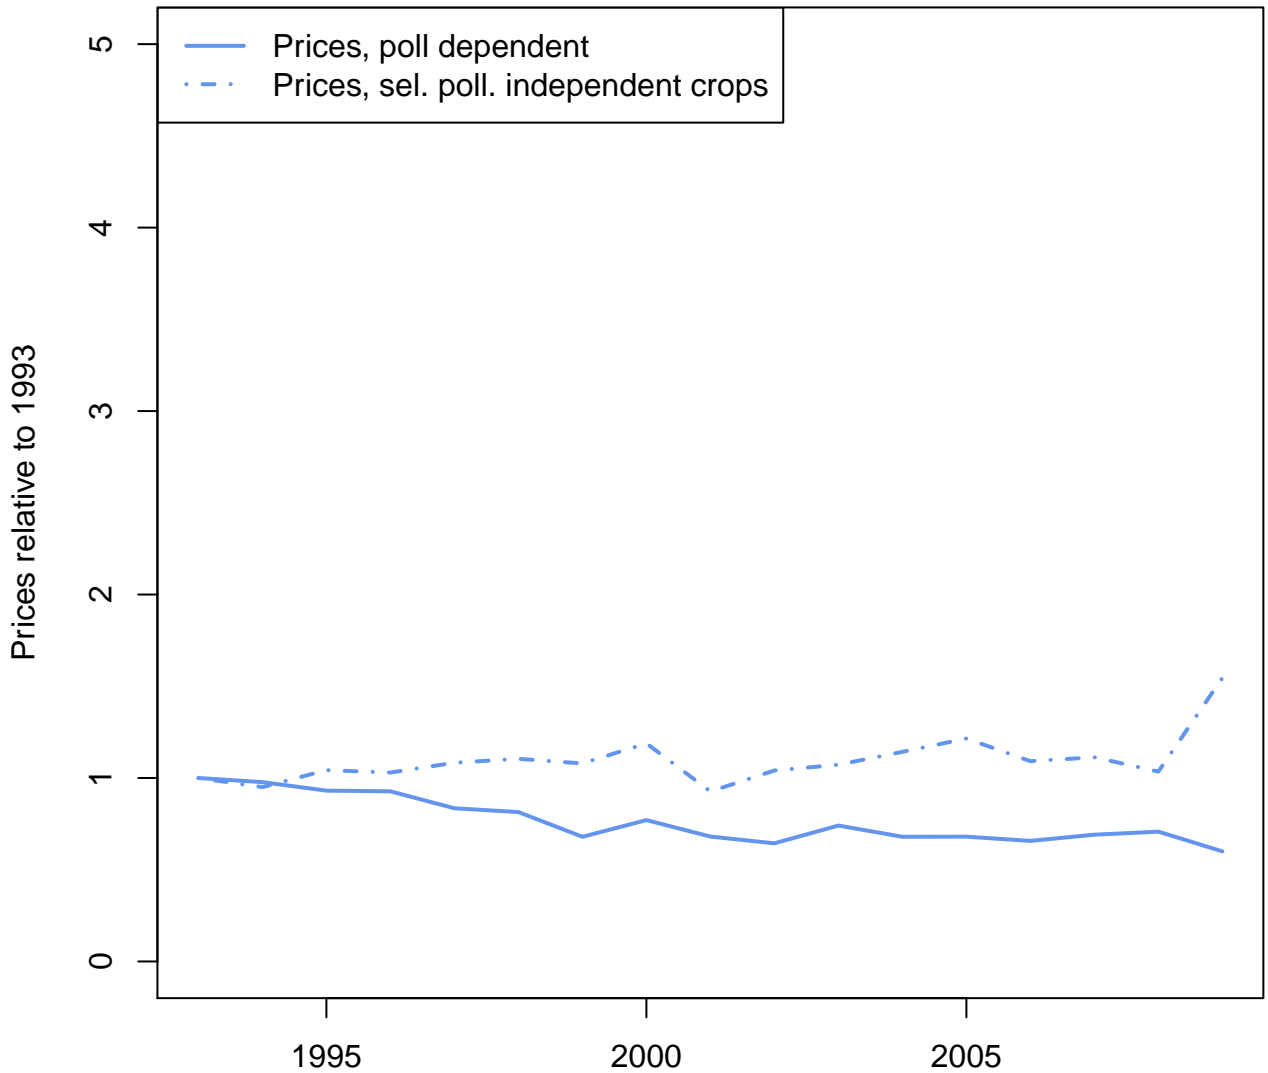

# Panama

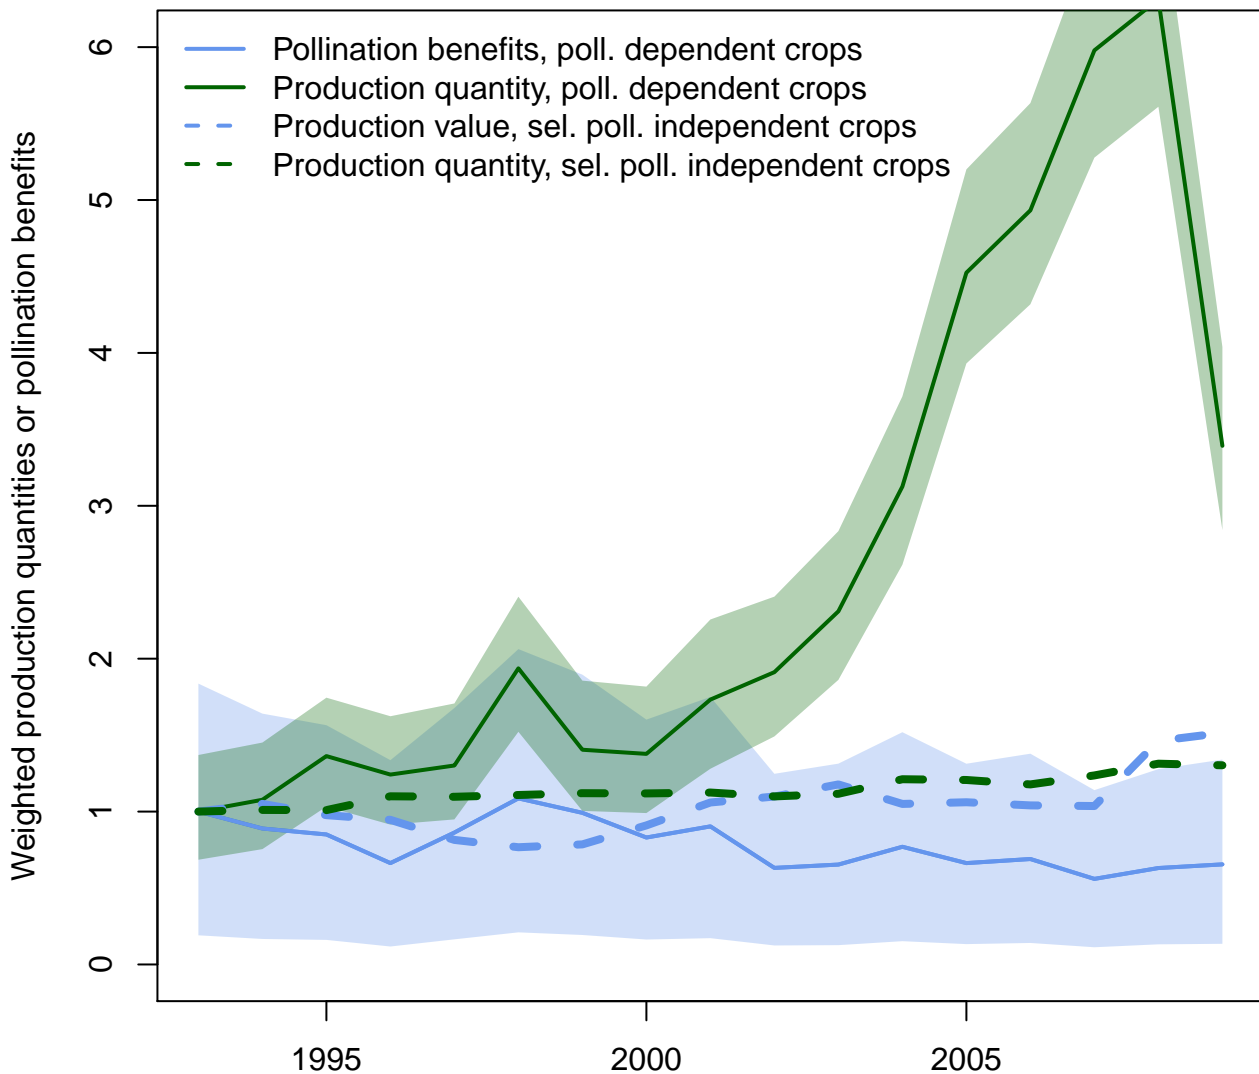



# Panama

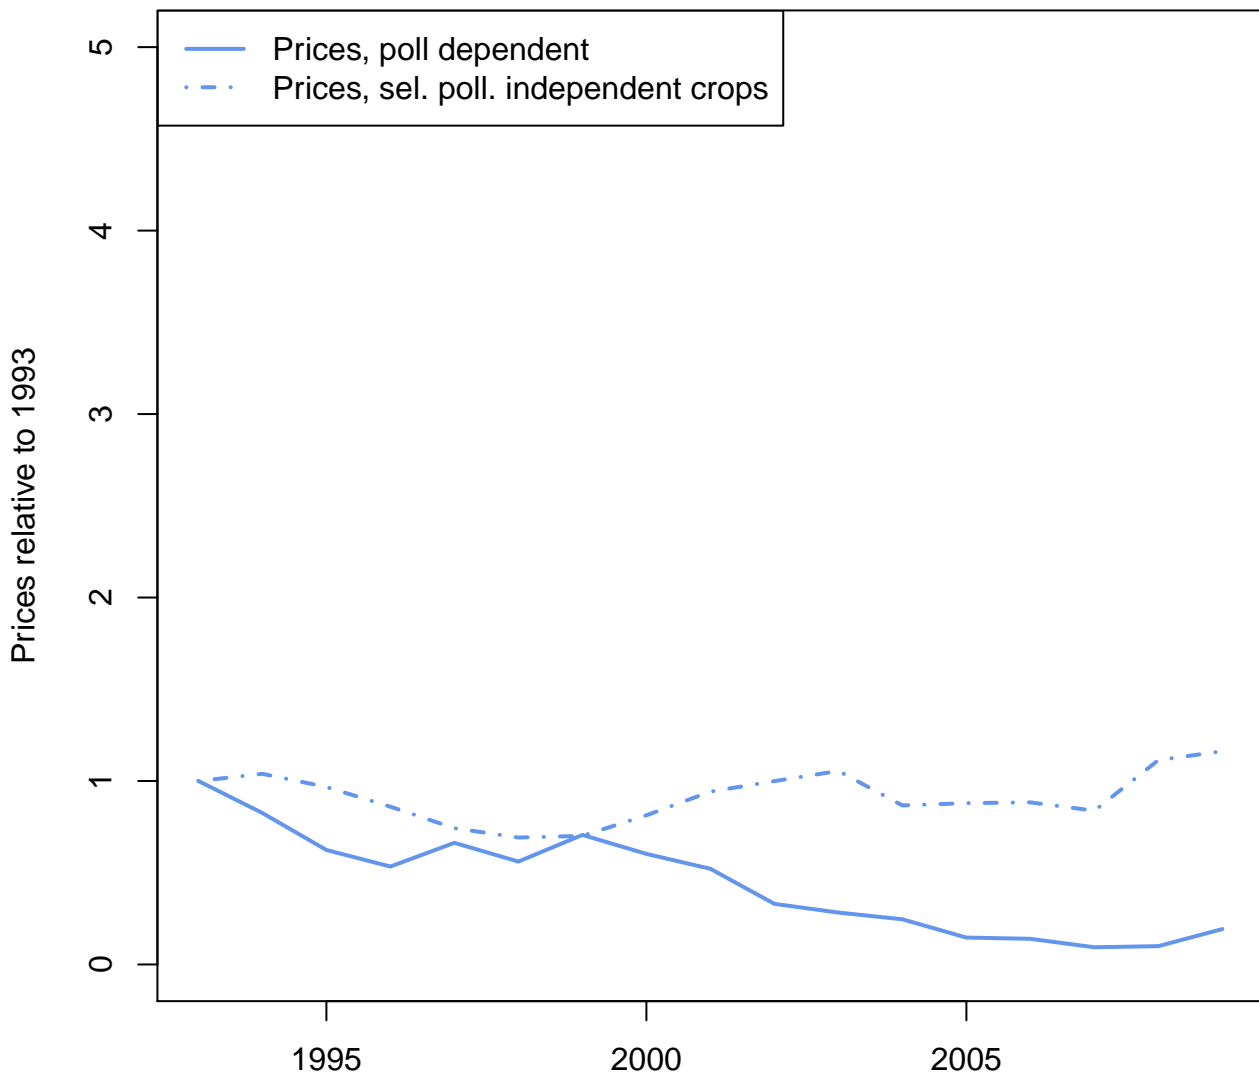

# Paraguay

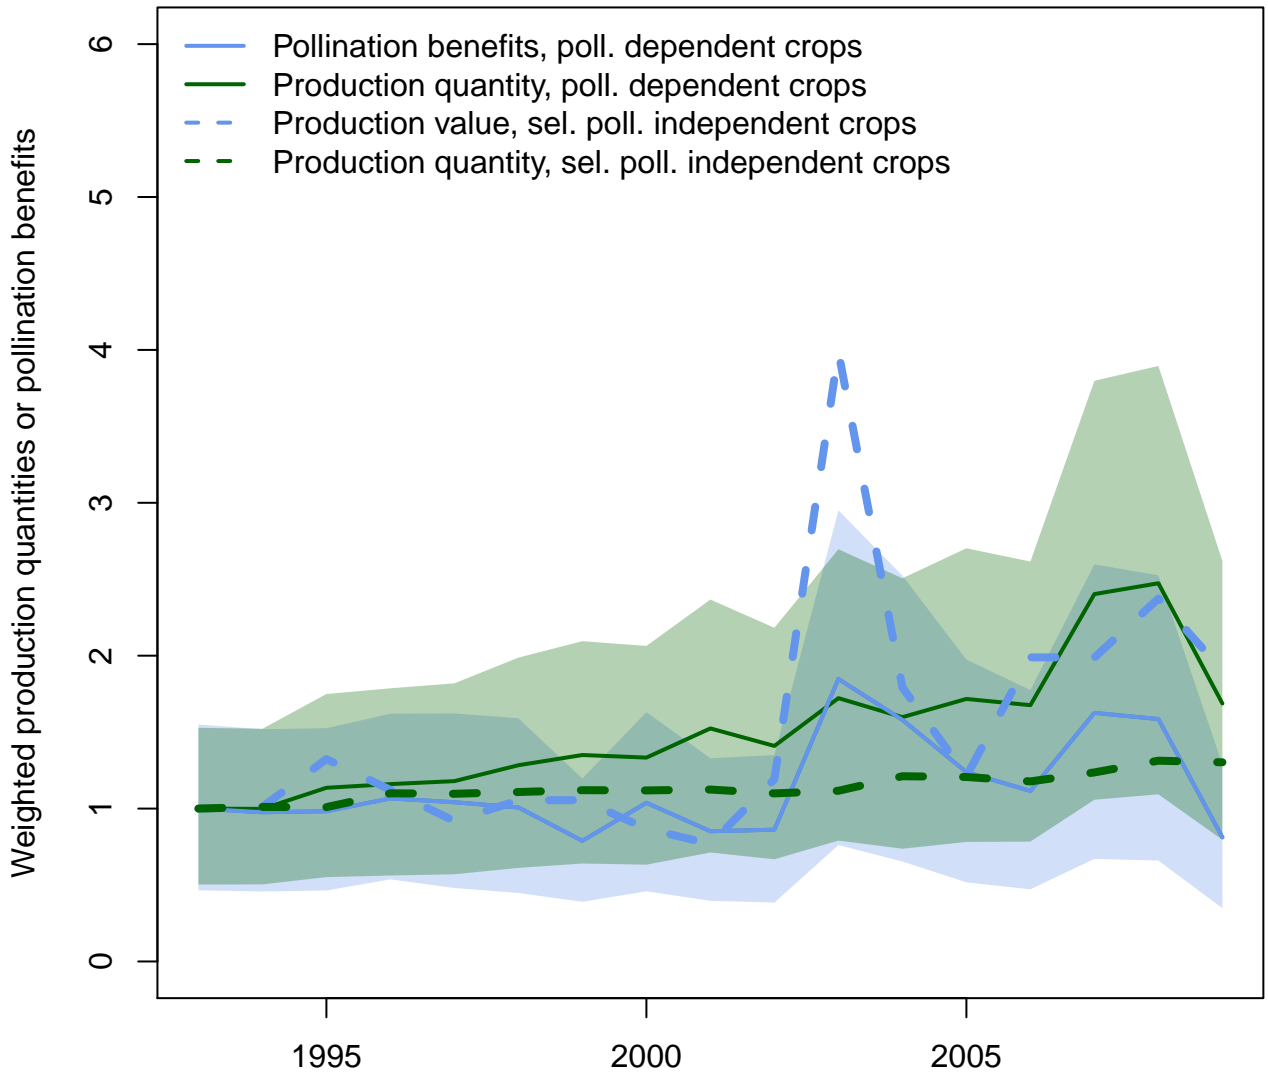

# Paraguay

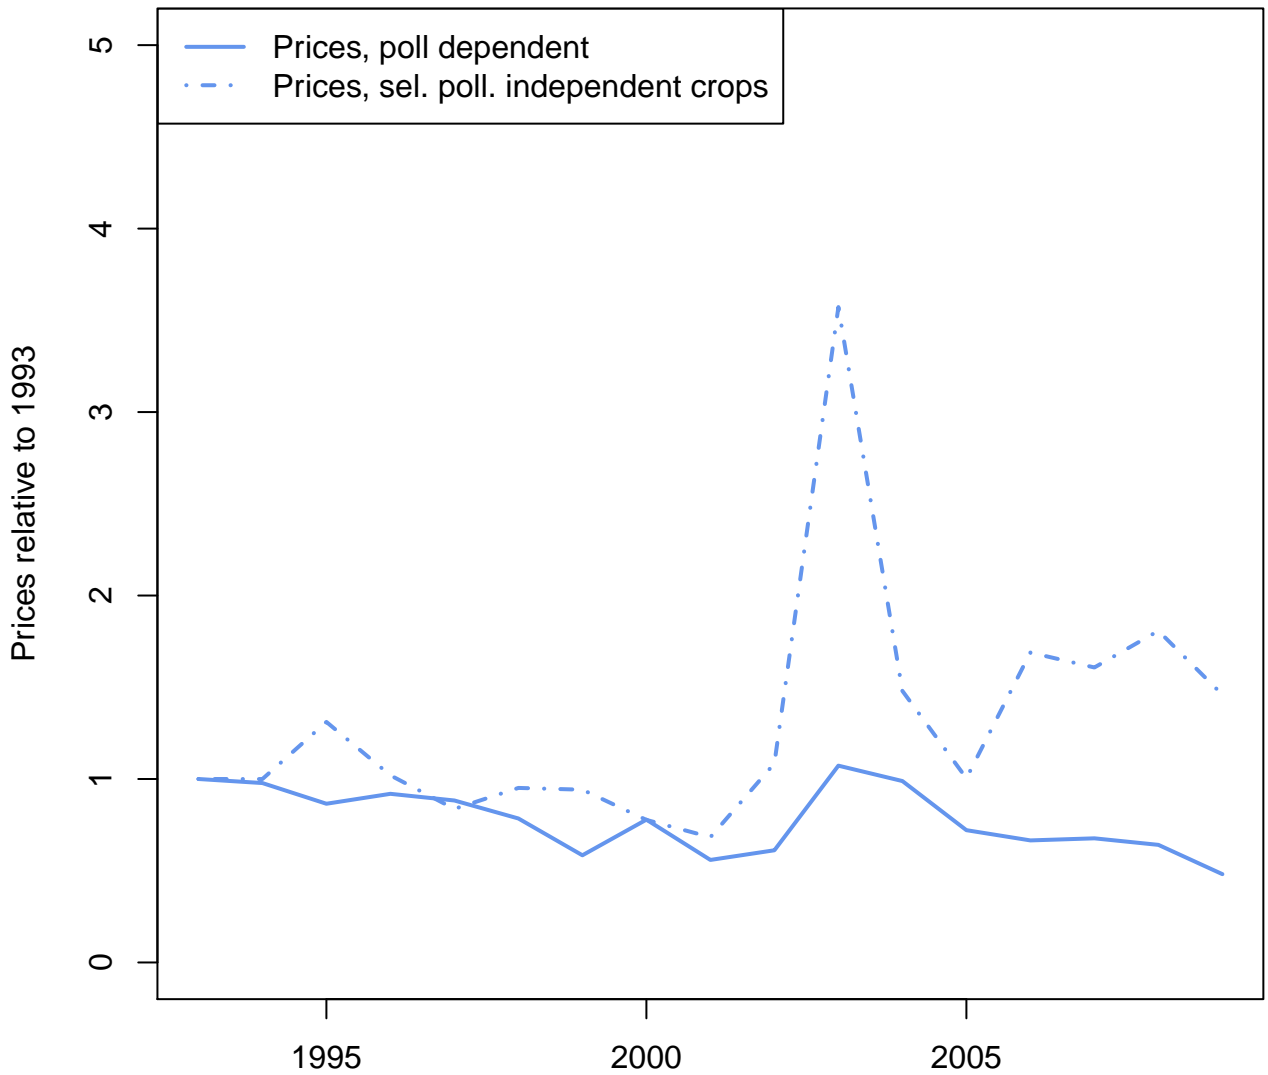

# Peru

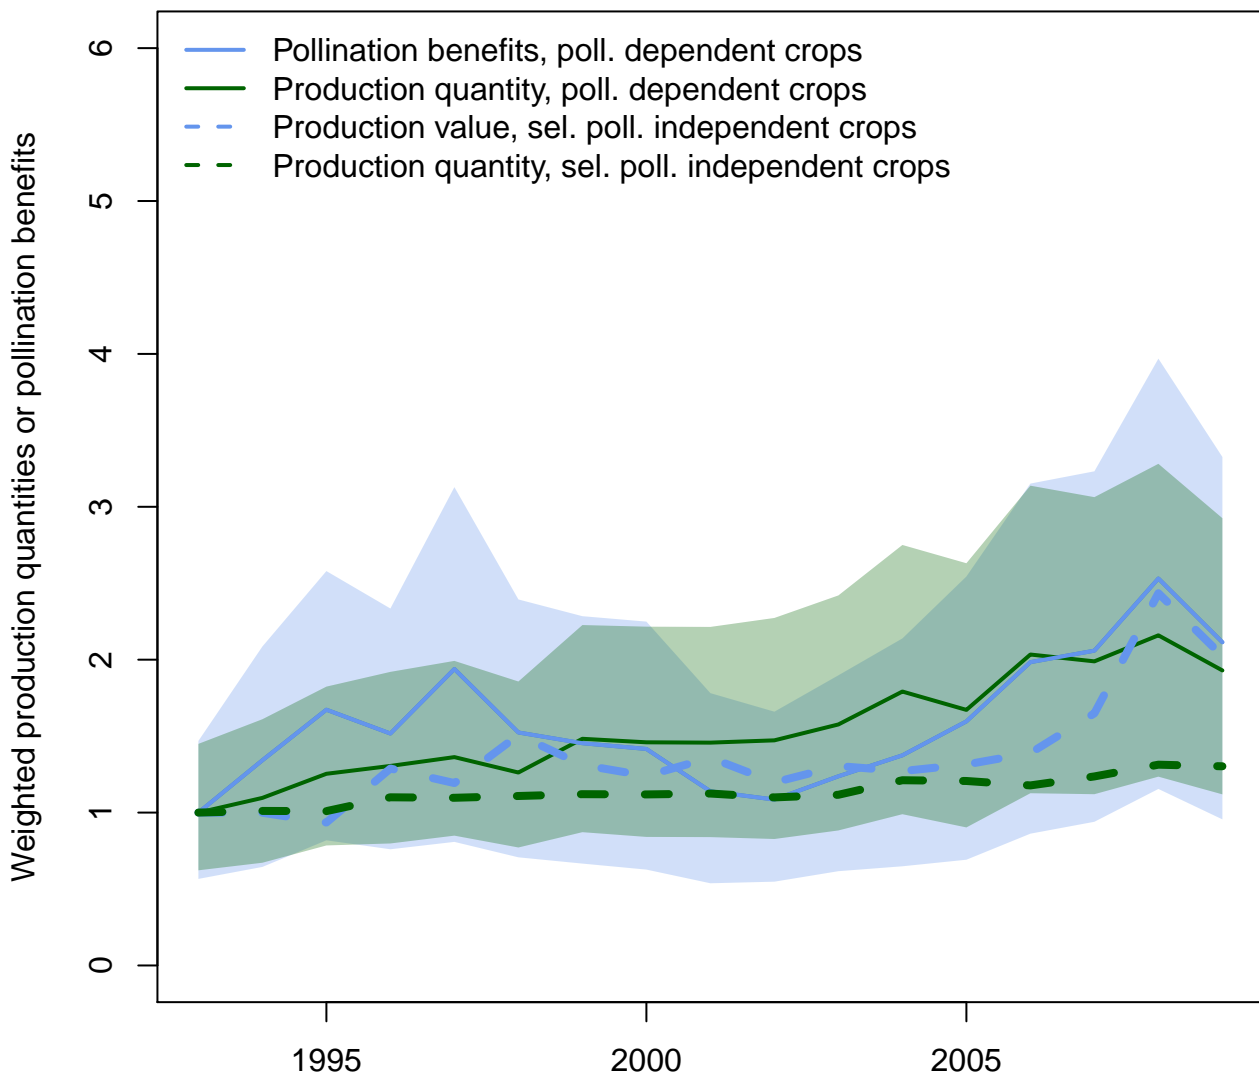

# Peru

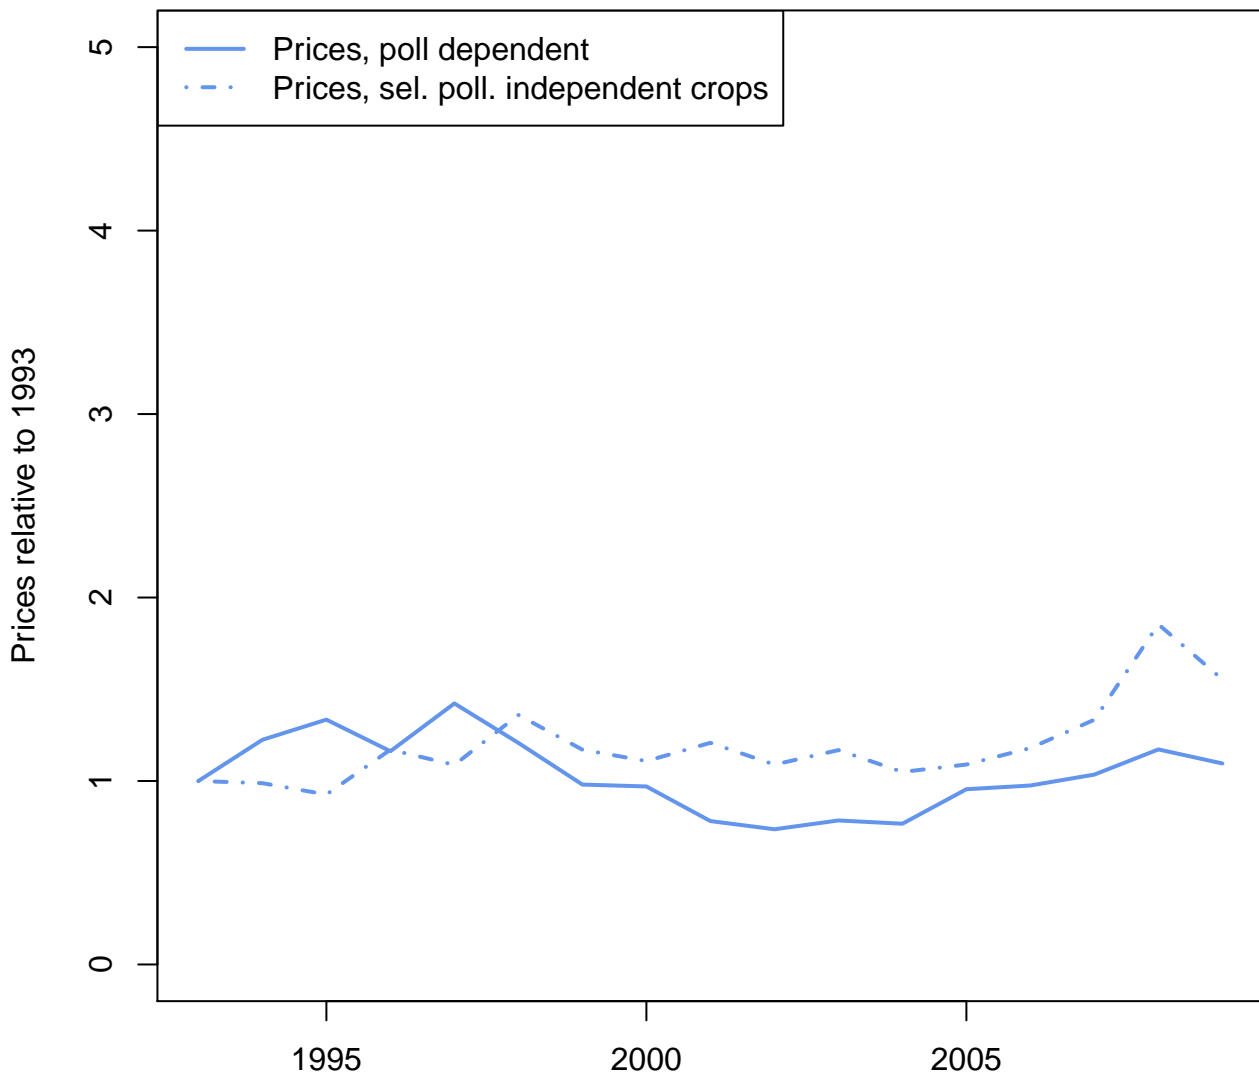

# Philippines

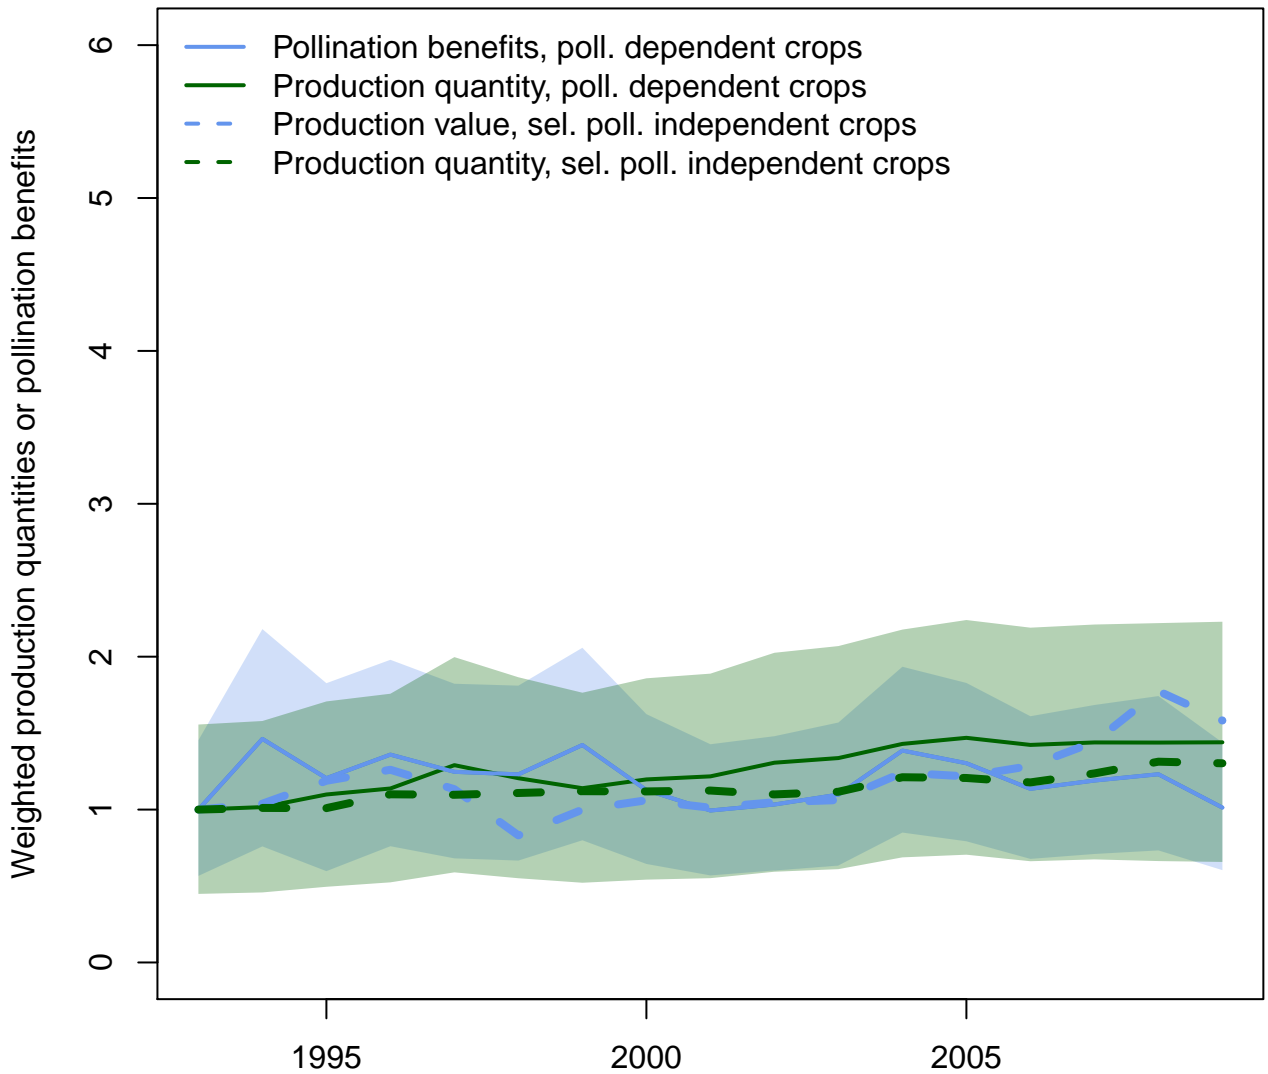

# Philippines

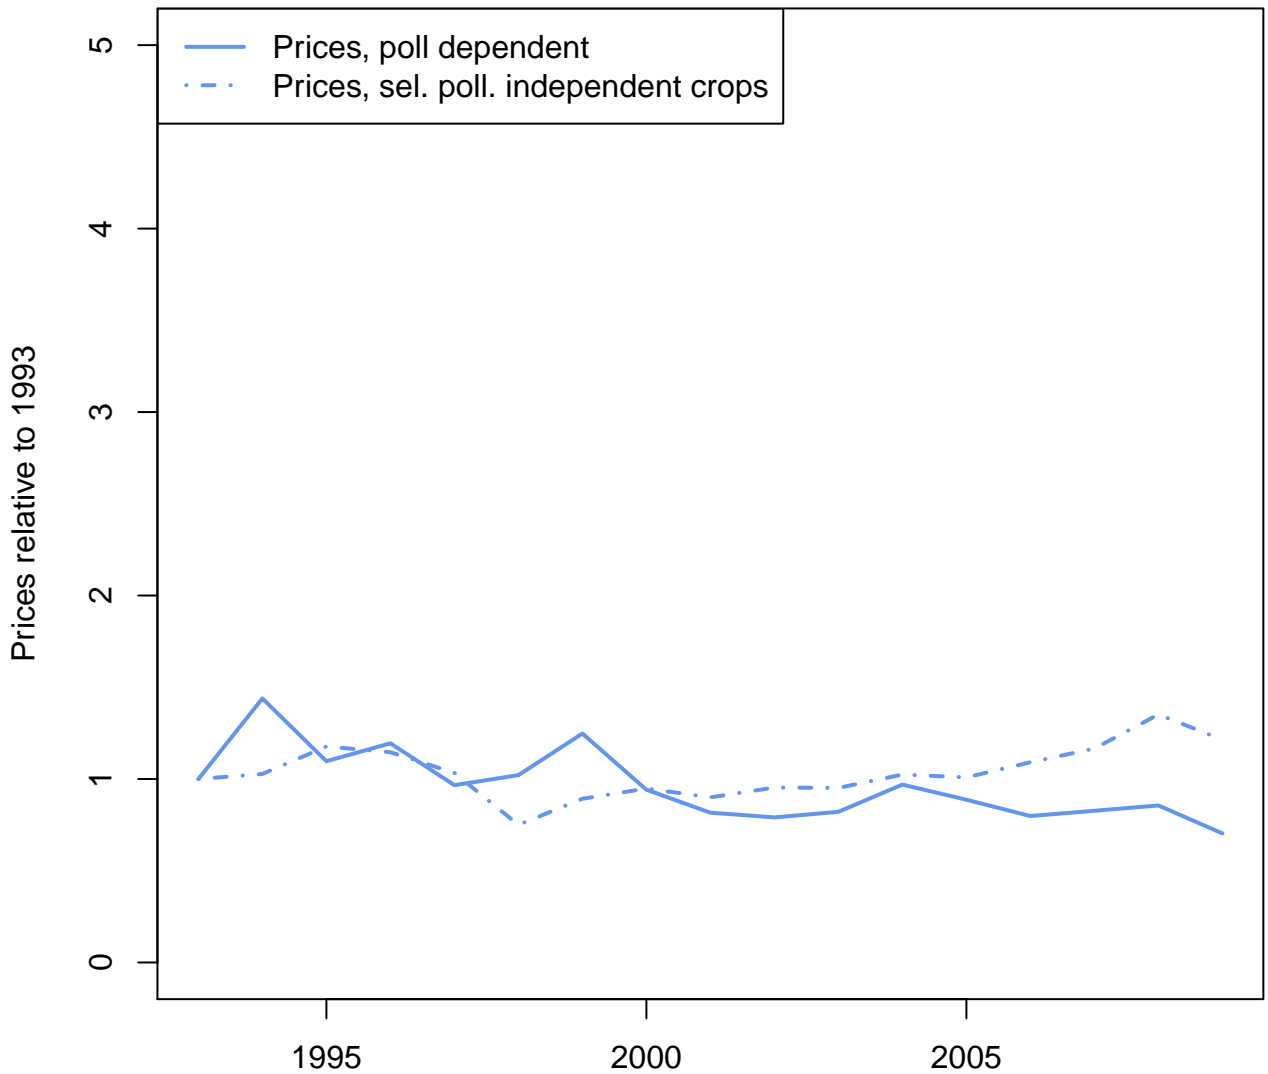

# Poland

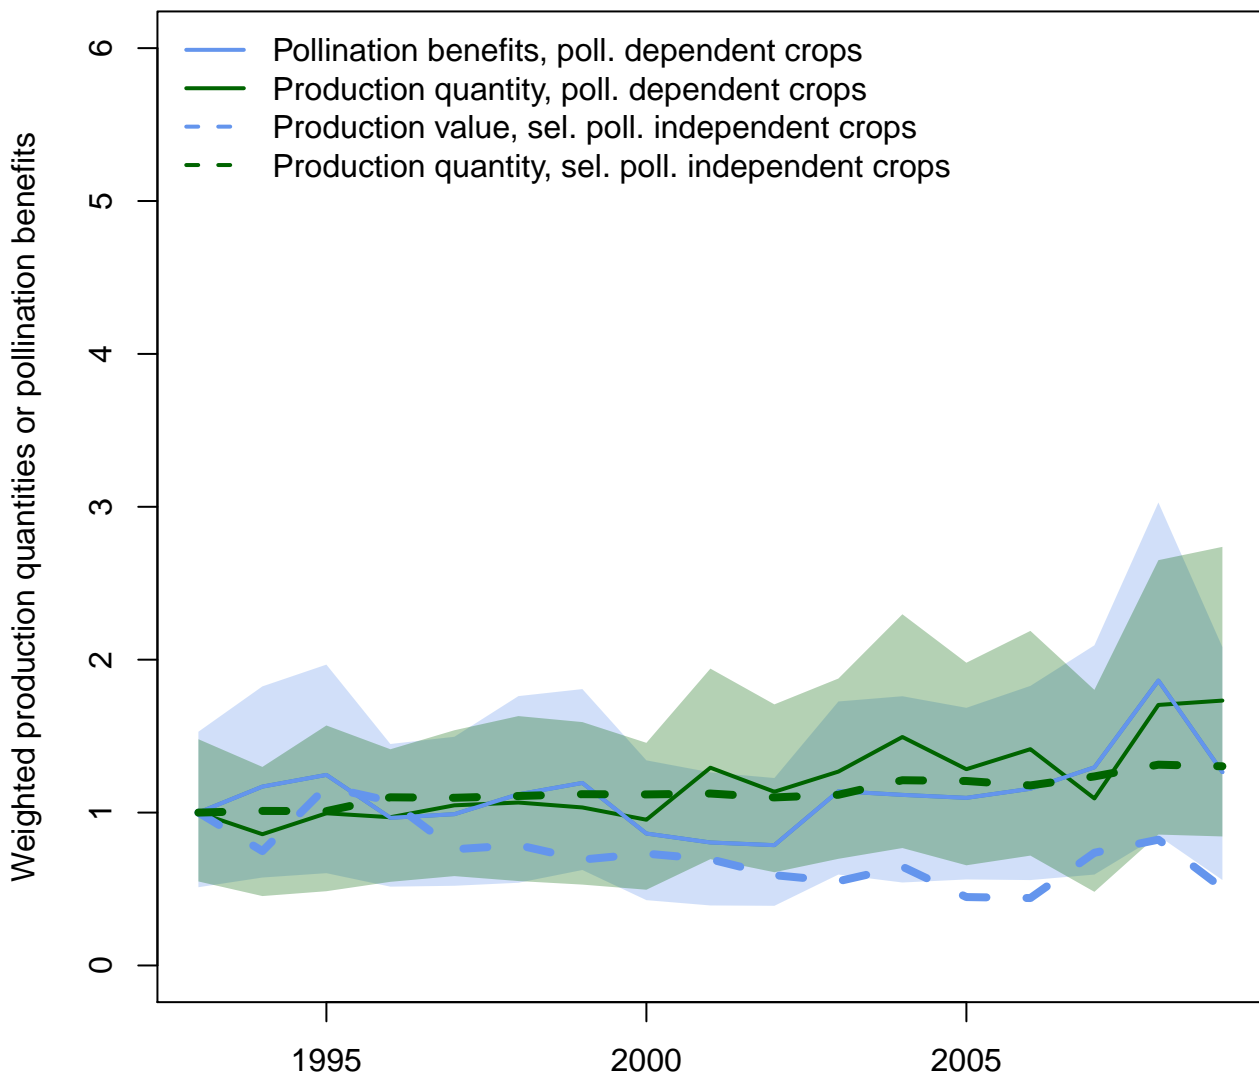



# Poland

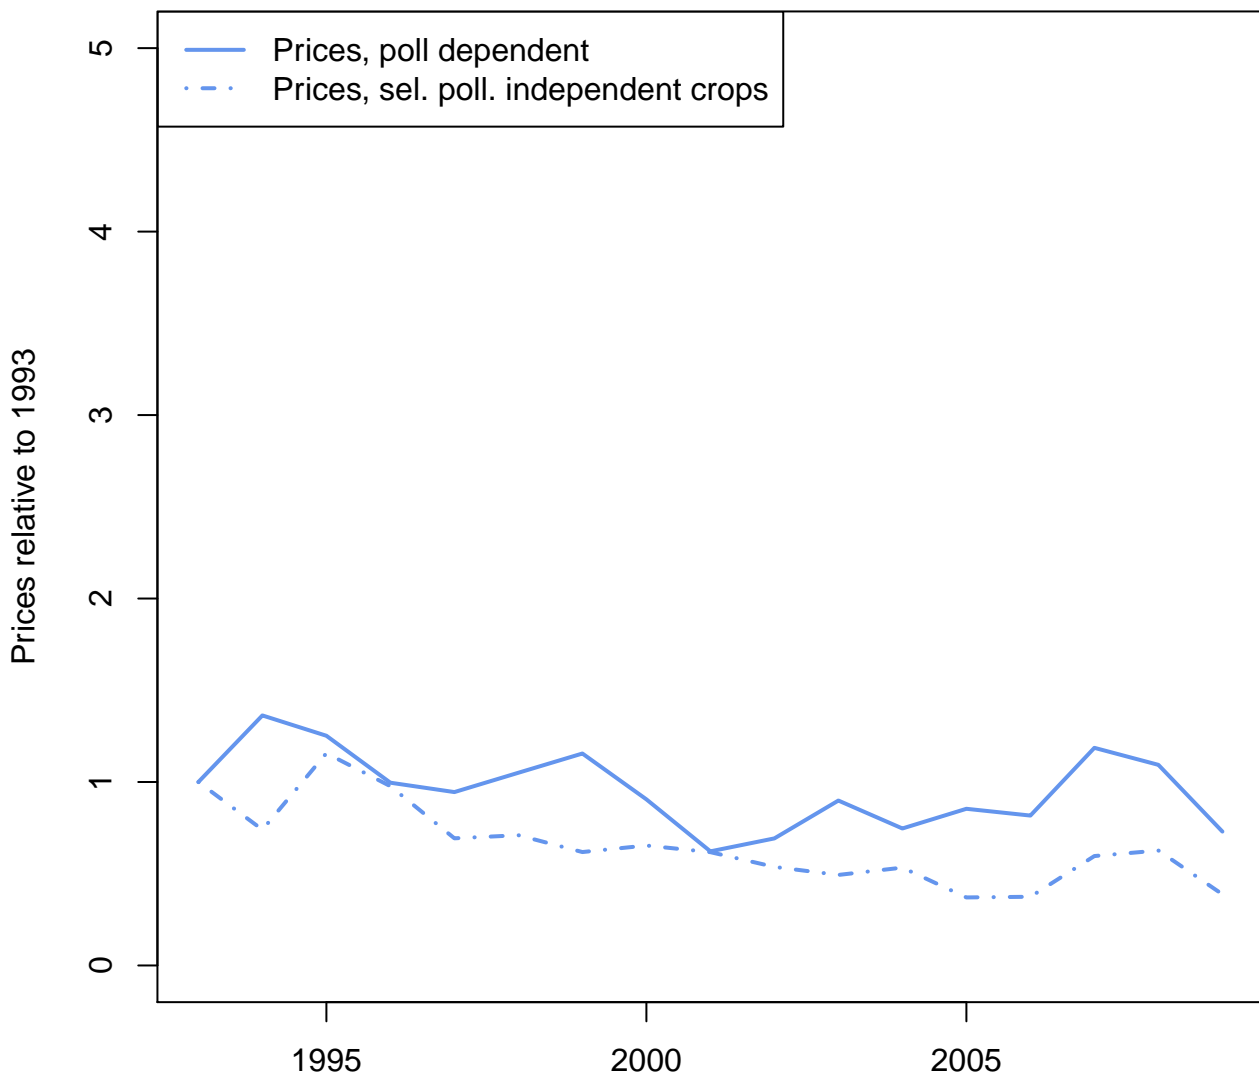

# Portugal

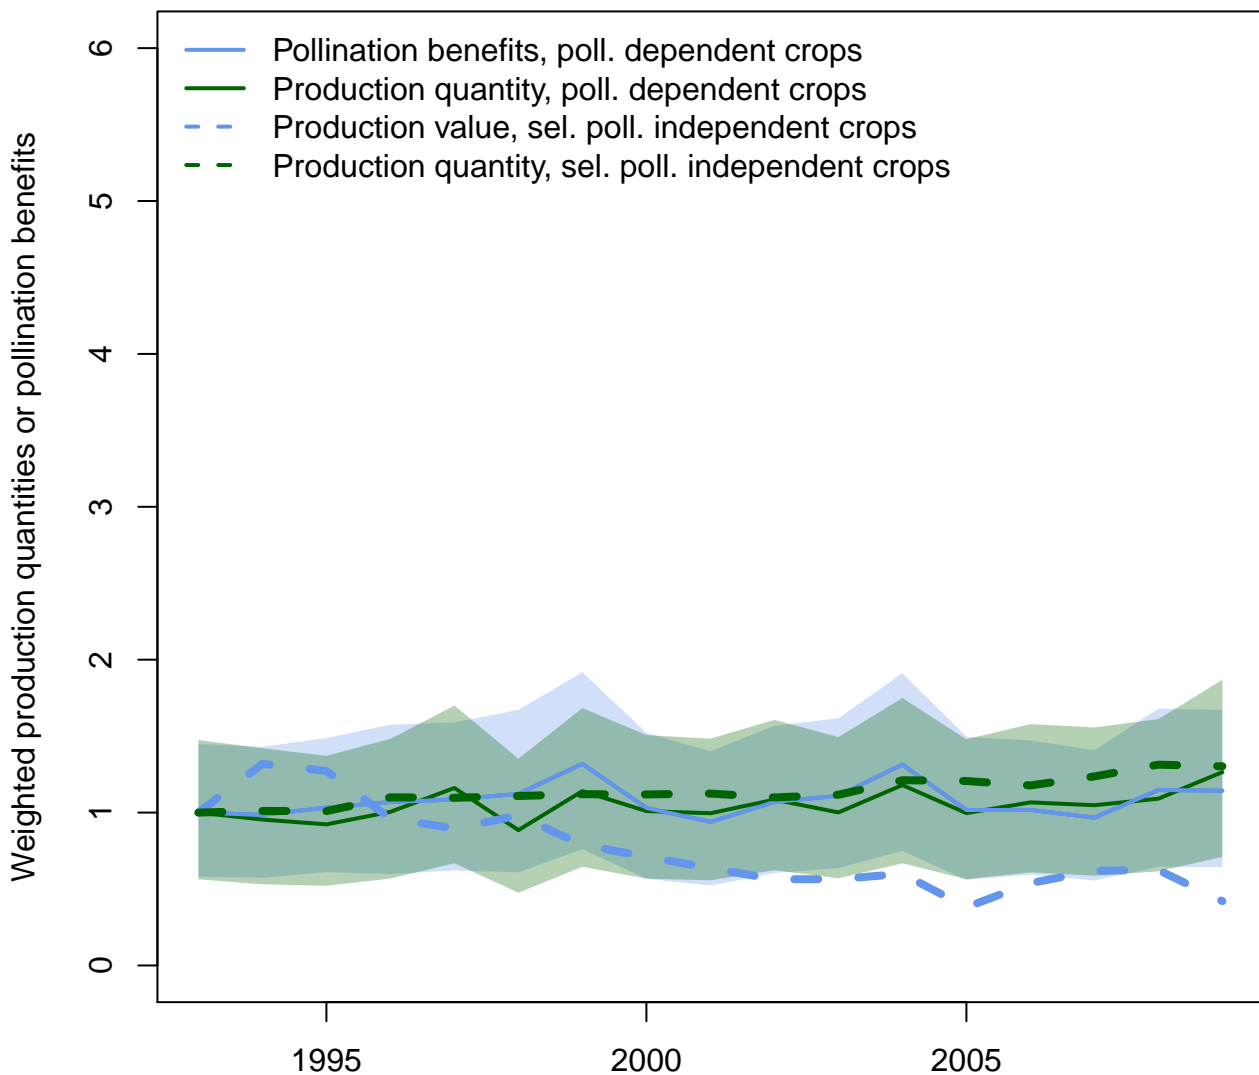

# Portugal

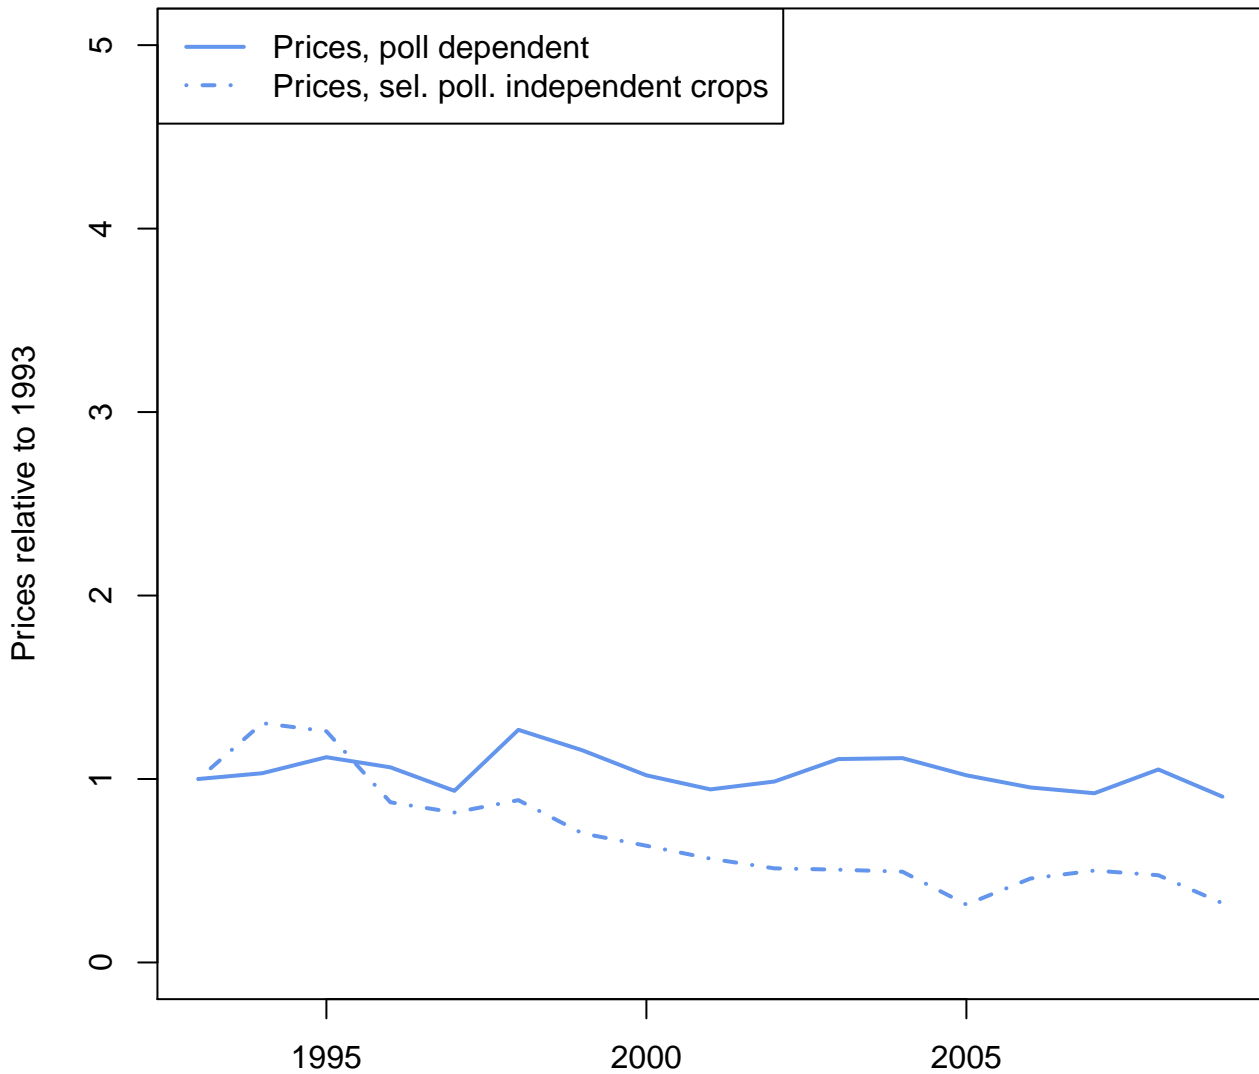

# Puerto Rico

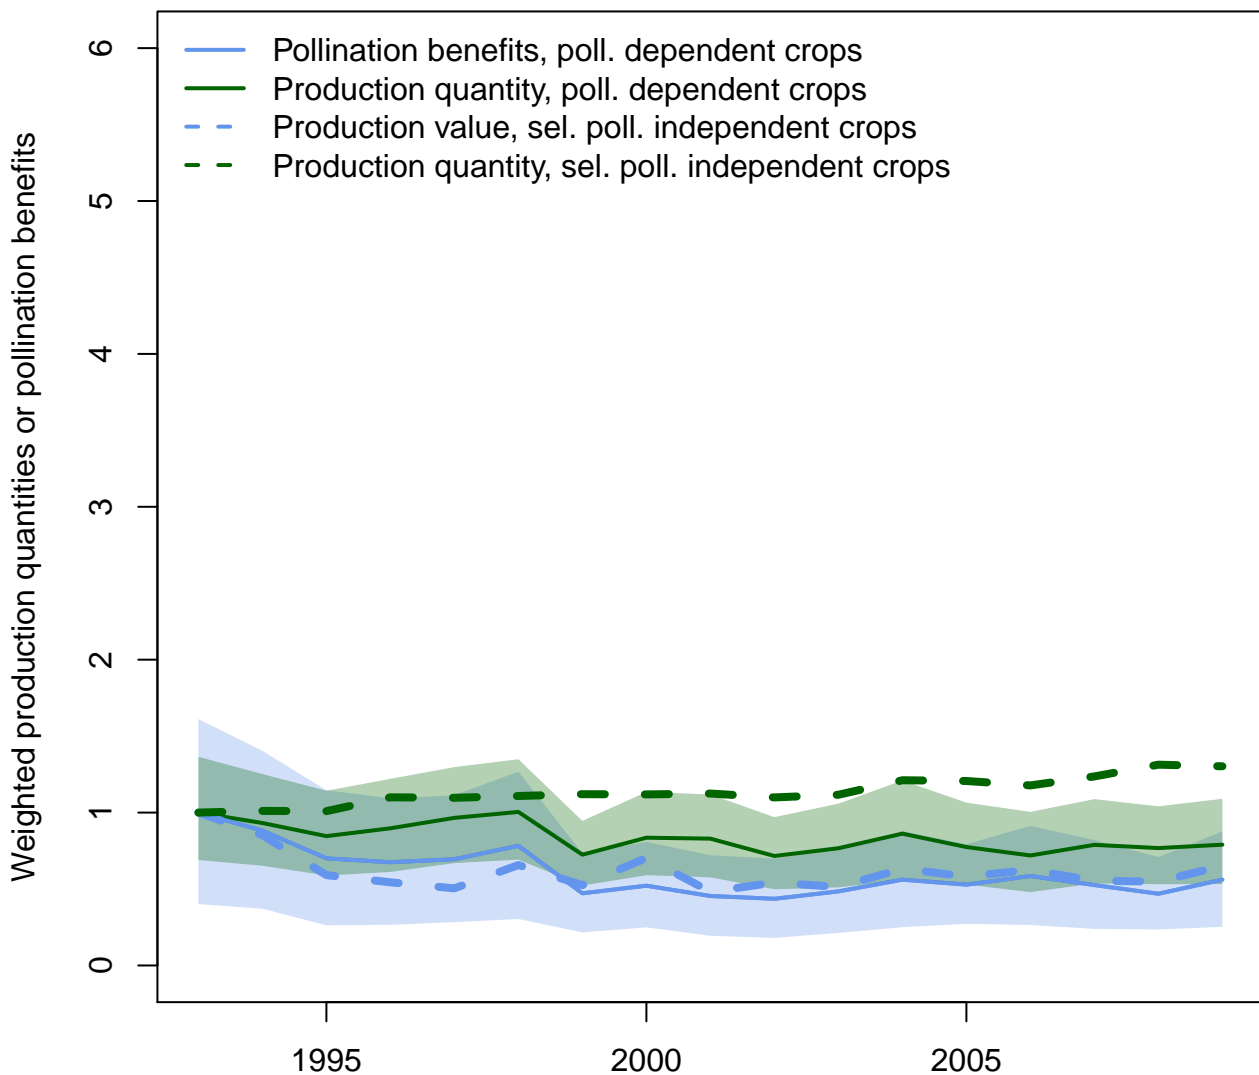

# Puerto Rico

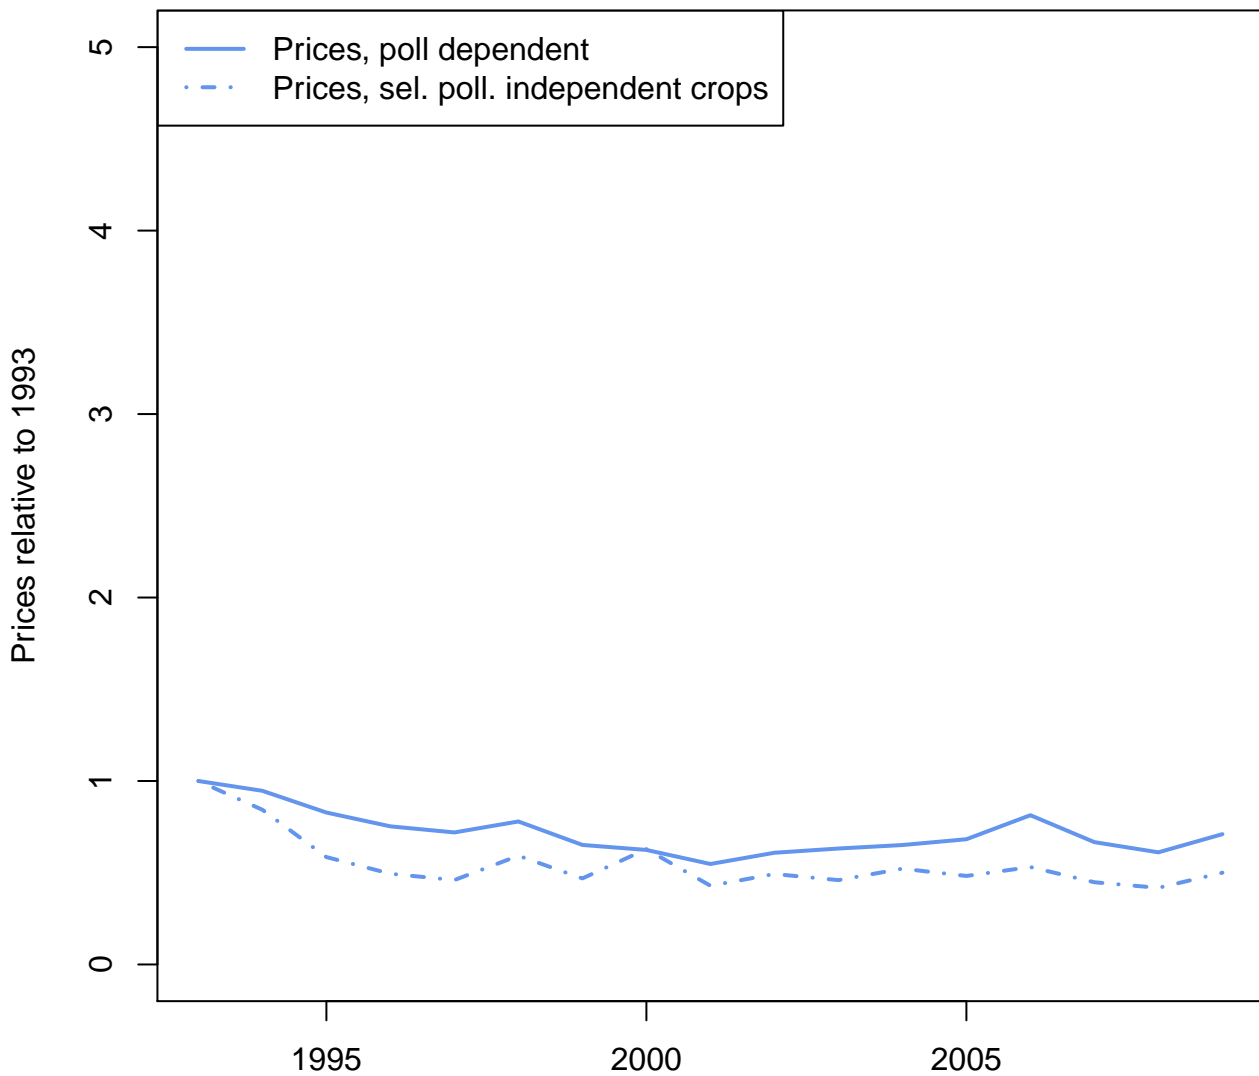

# Qatar

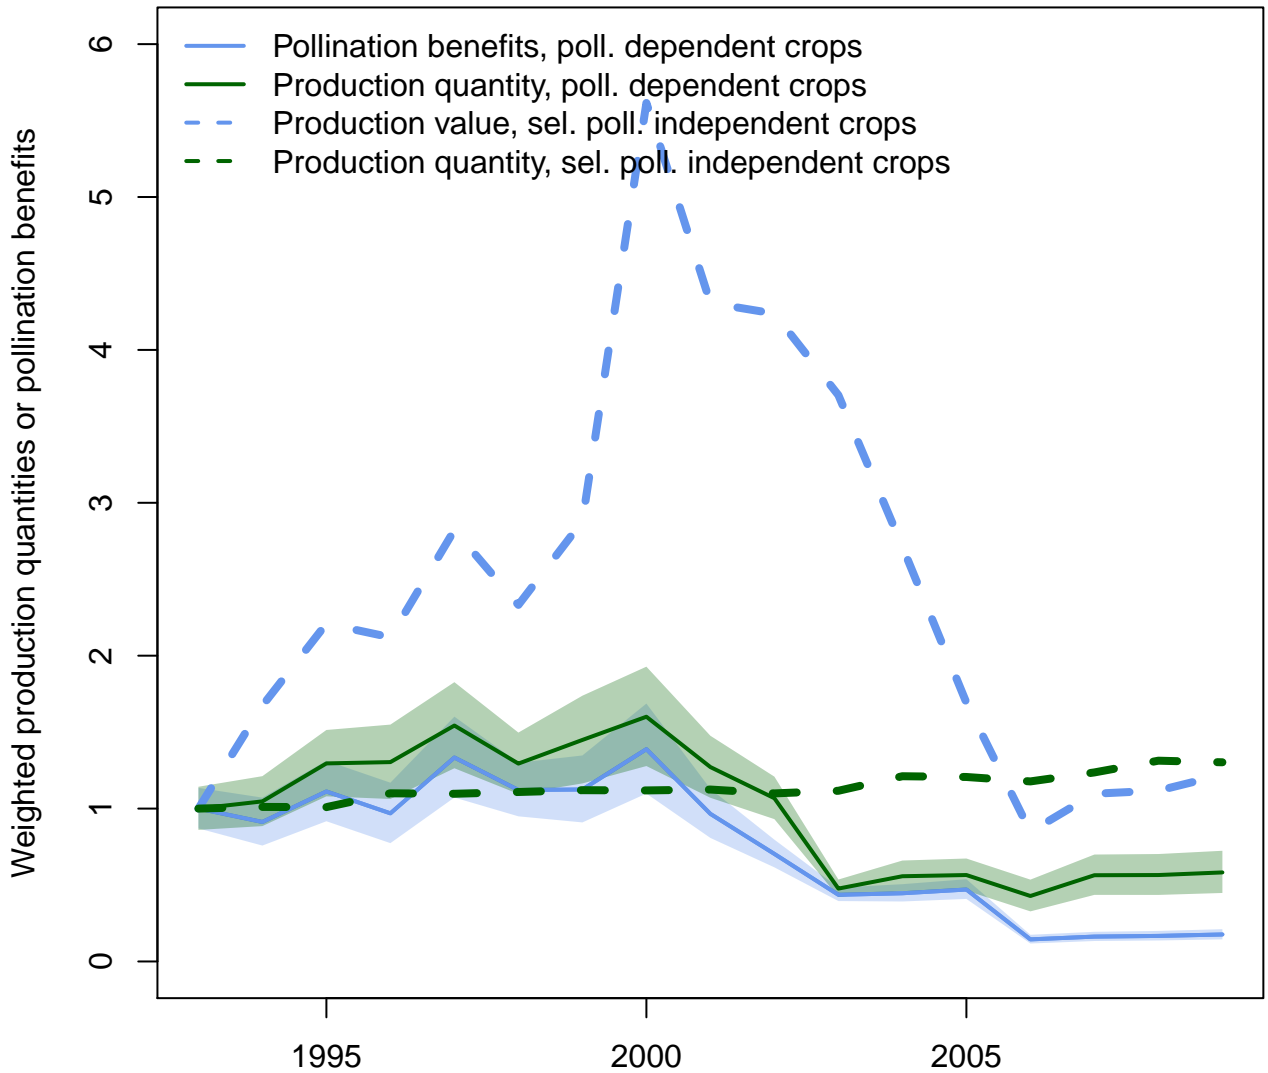

## Qatar

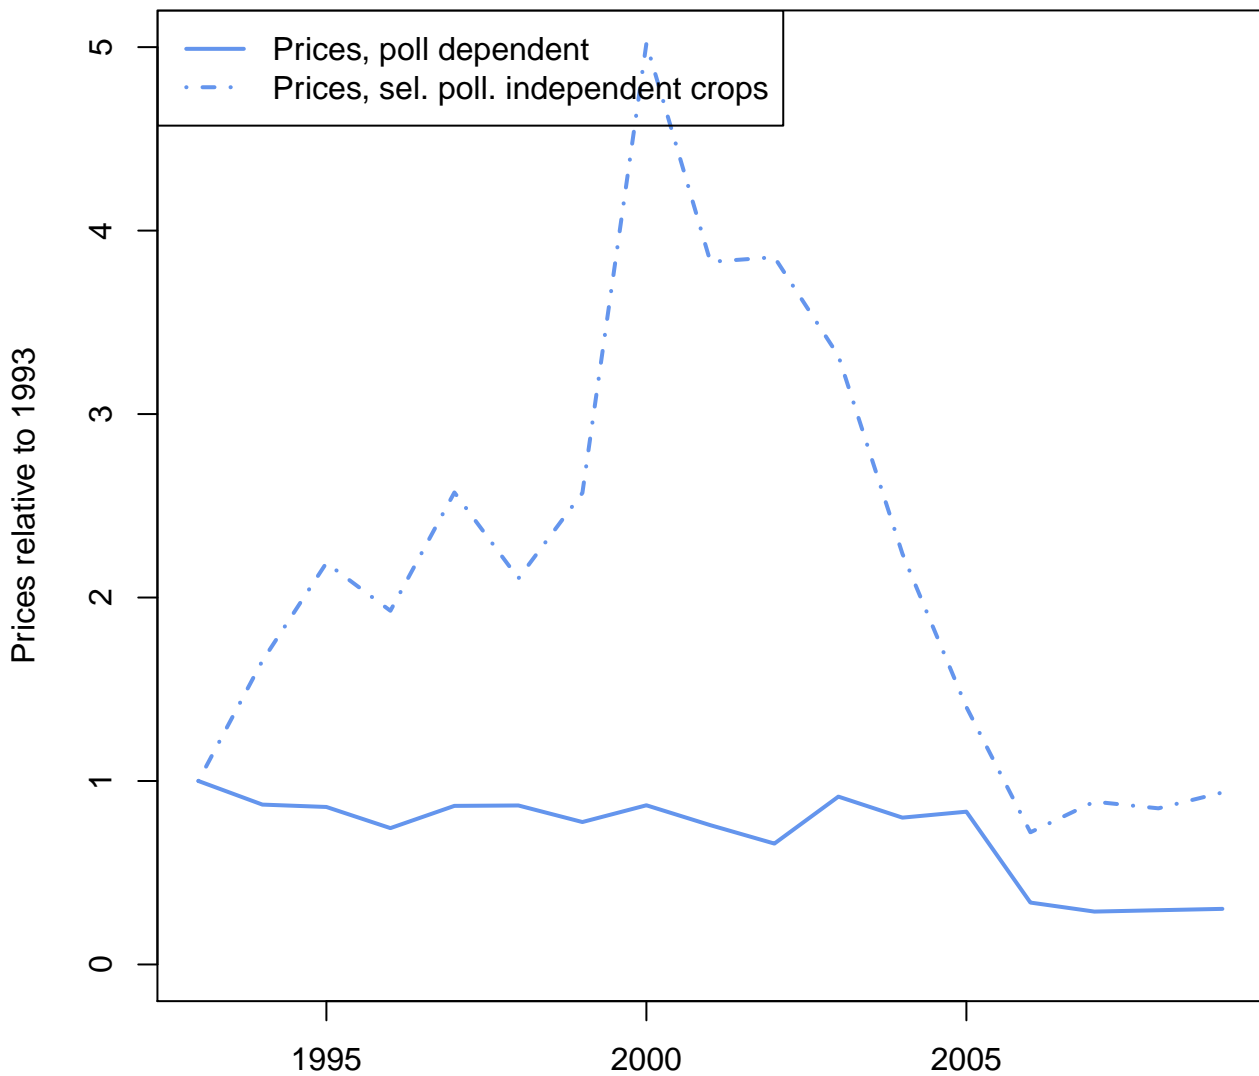

# Republic of Korea

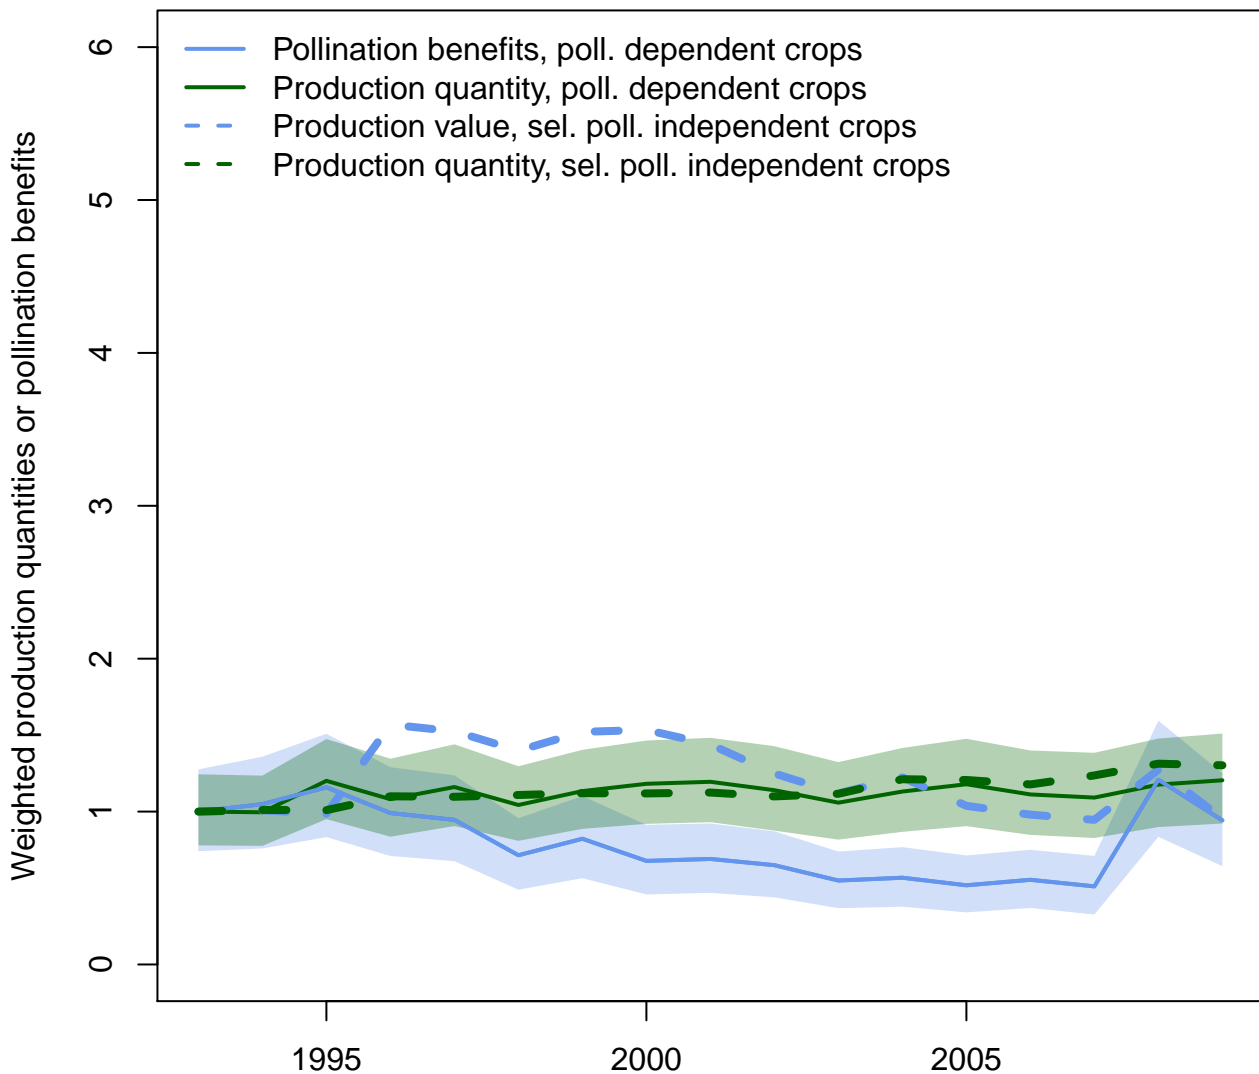



# Republic of Korea

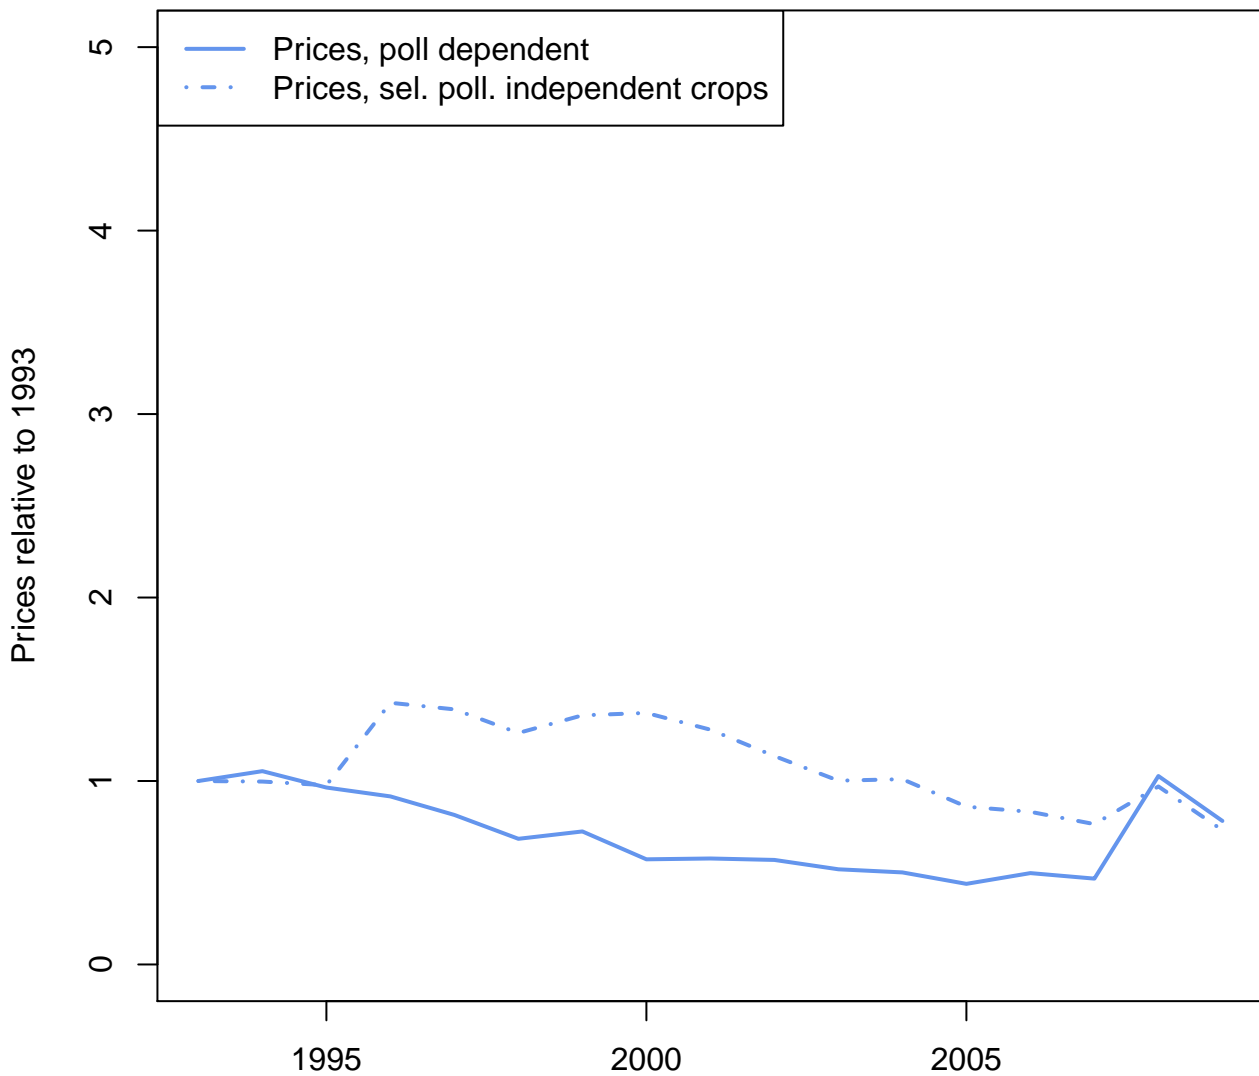

## Republic of Moldova

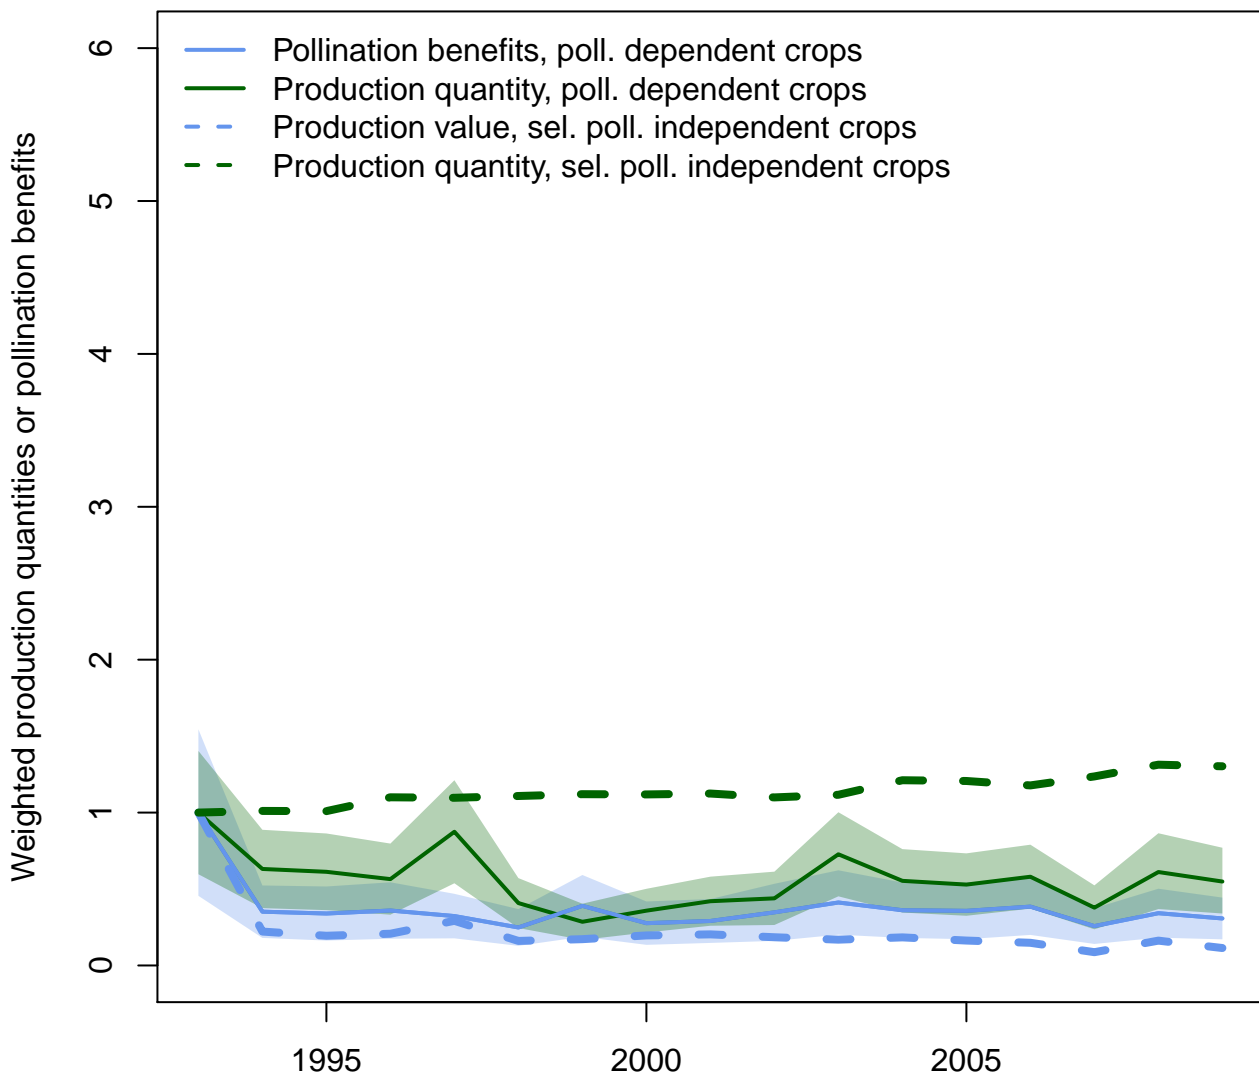

# Republic of Moldova

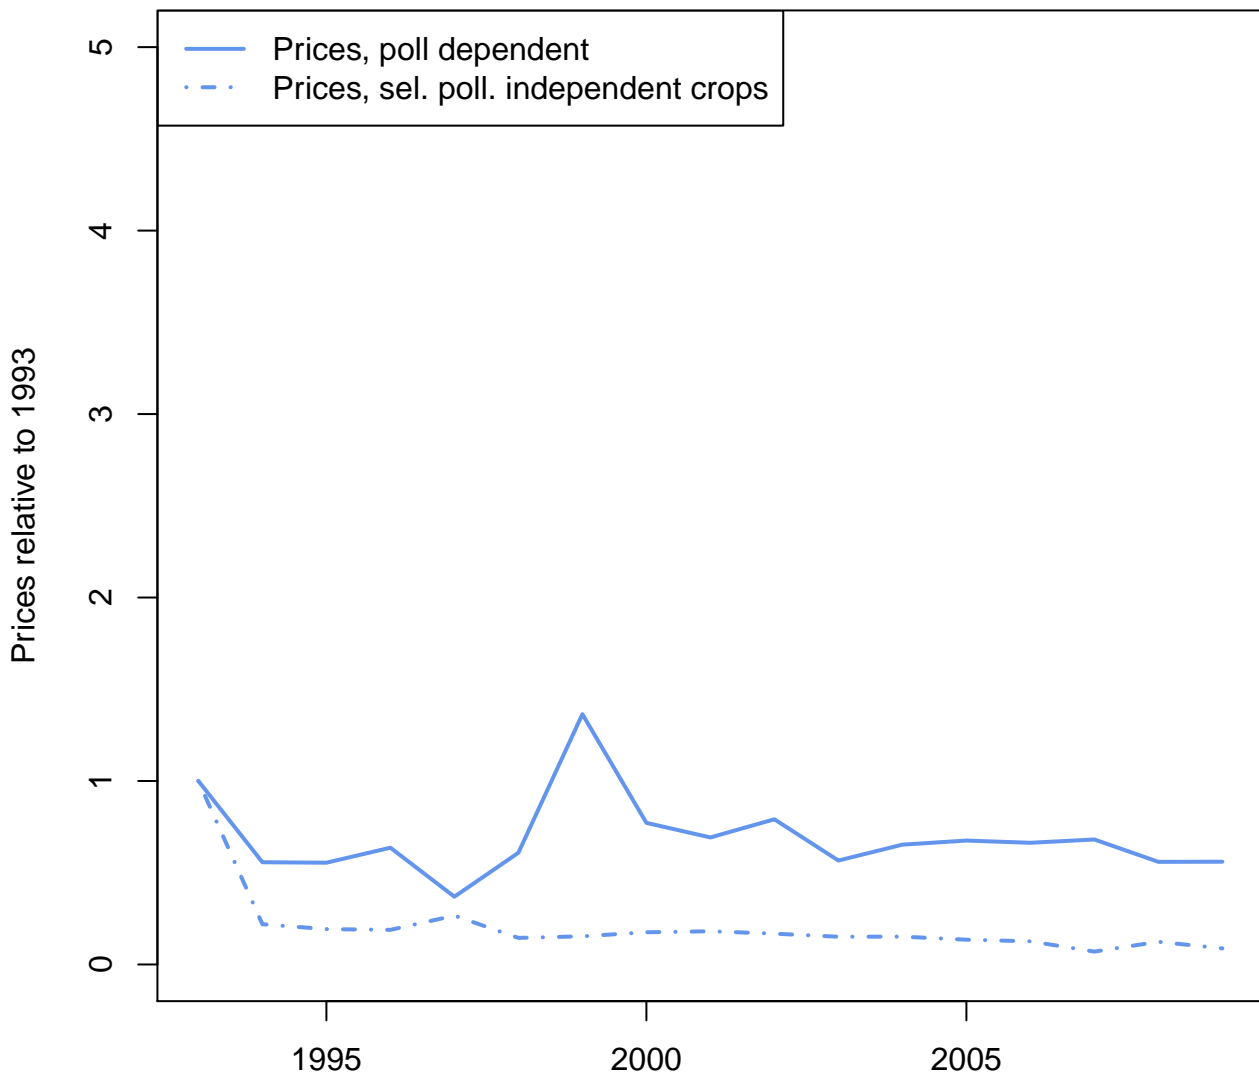

# Romania

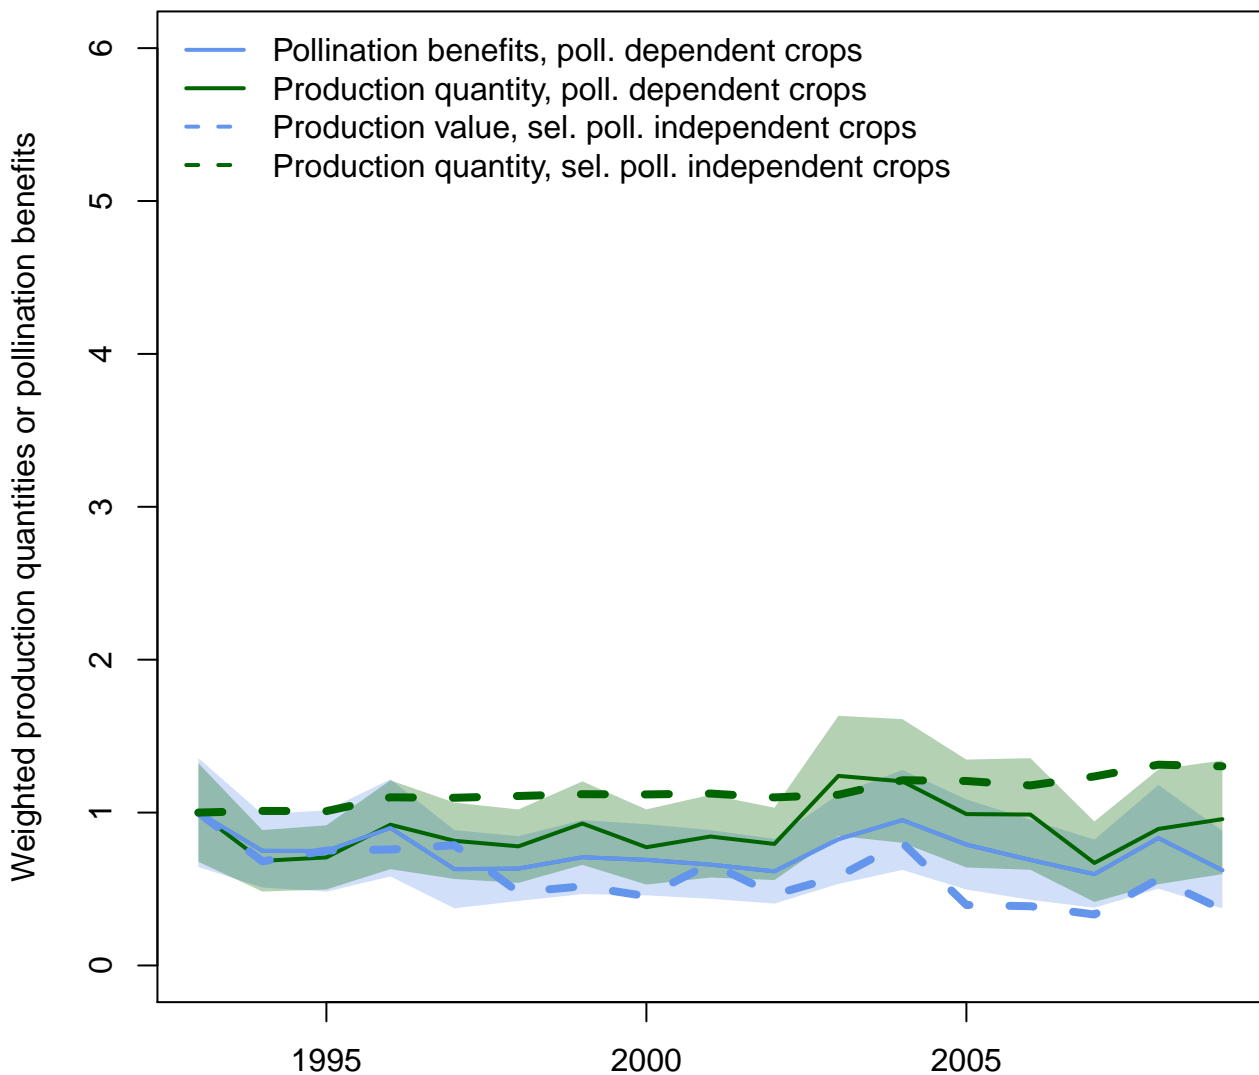

# Romania

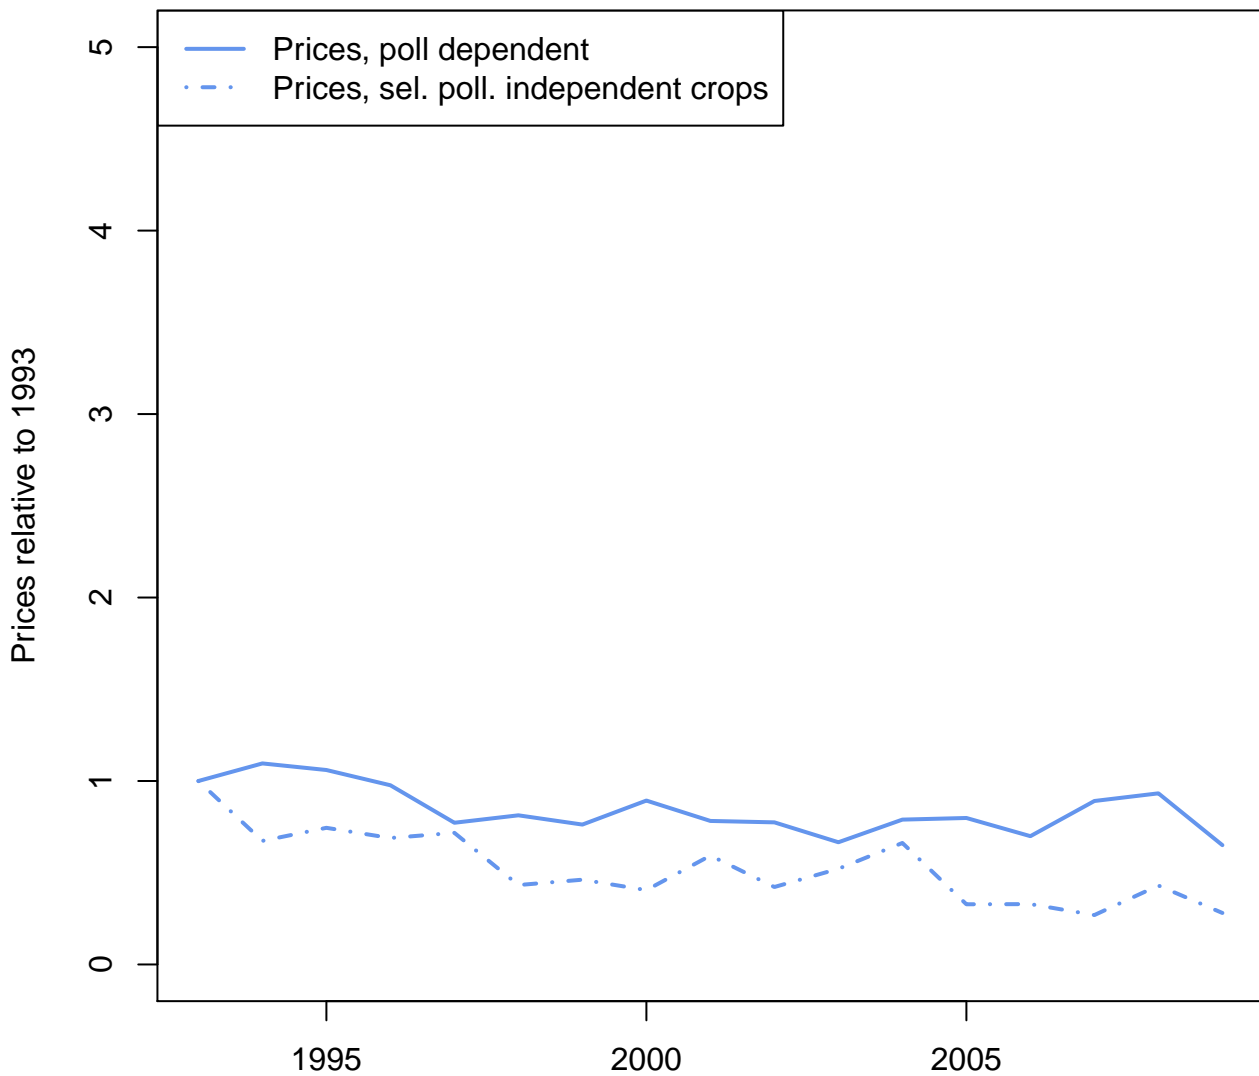

## Russian Federation

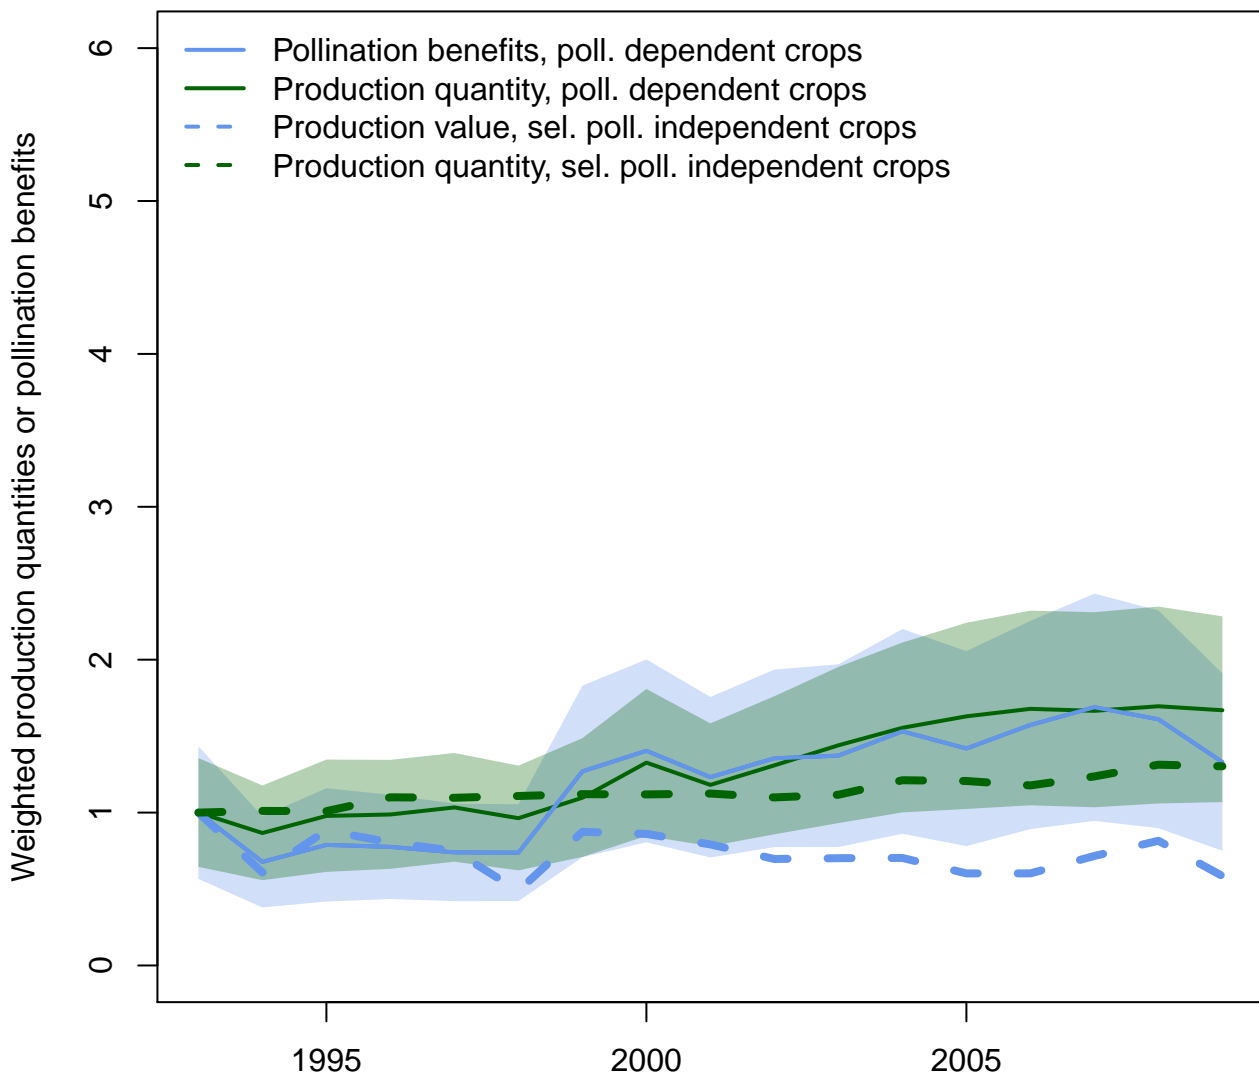

# Russian Federation

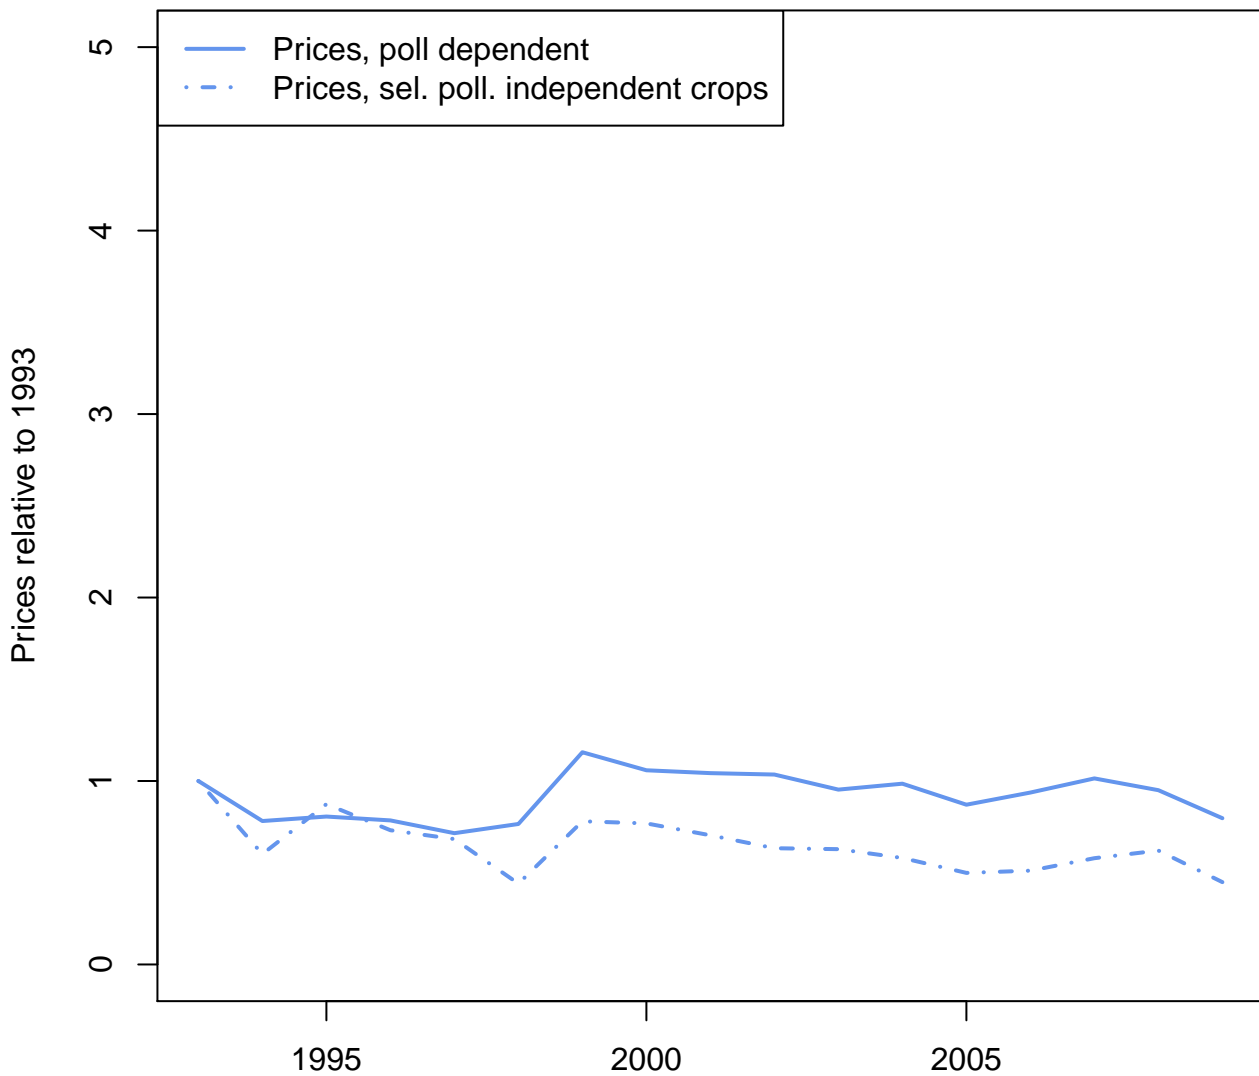

# Rwanda

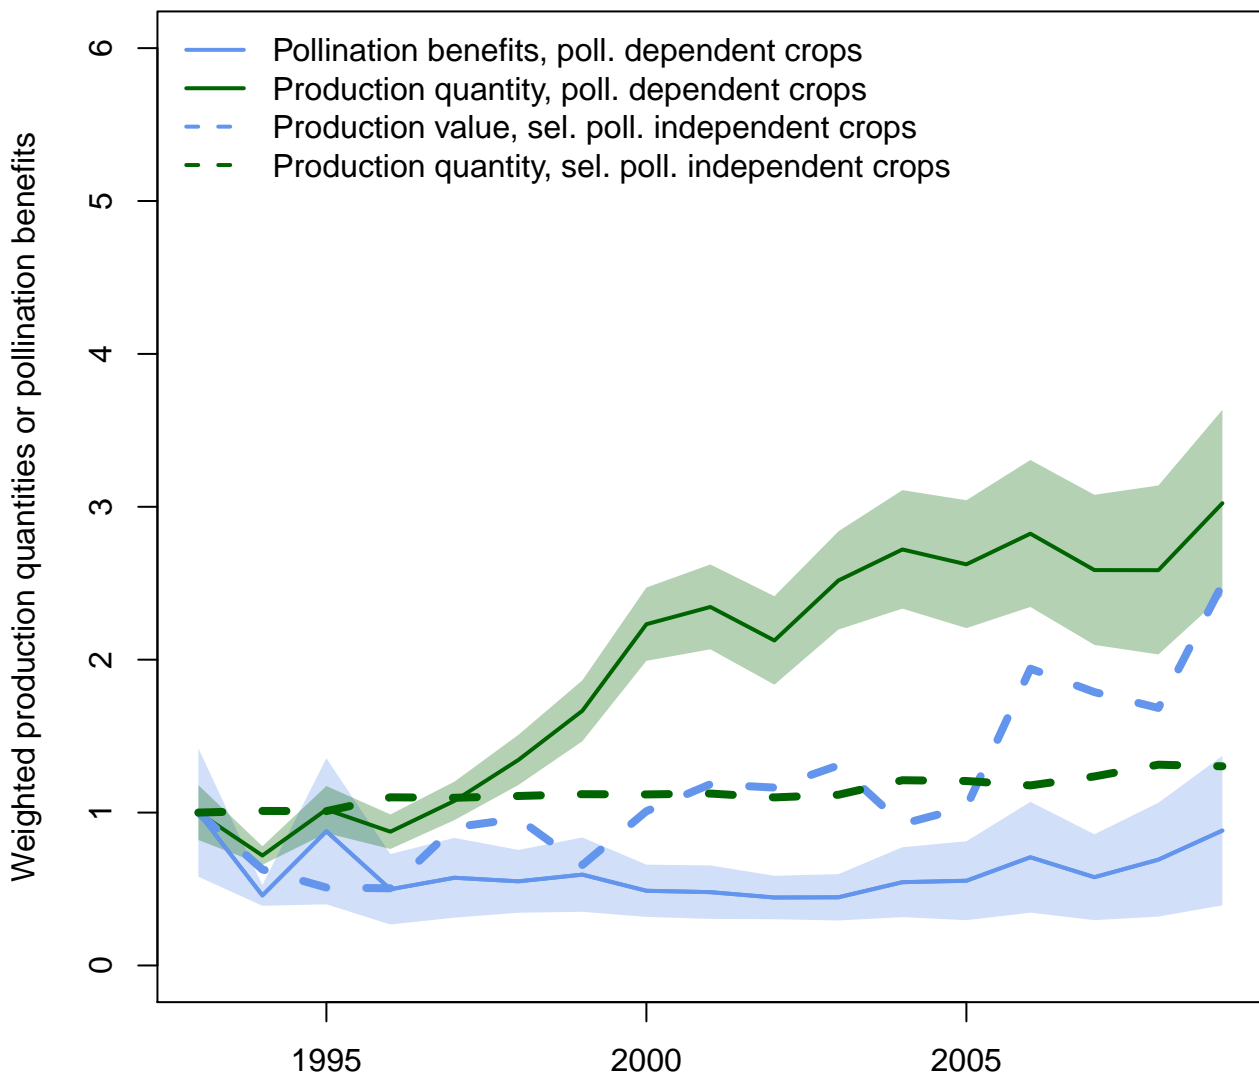



# Rwanda

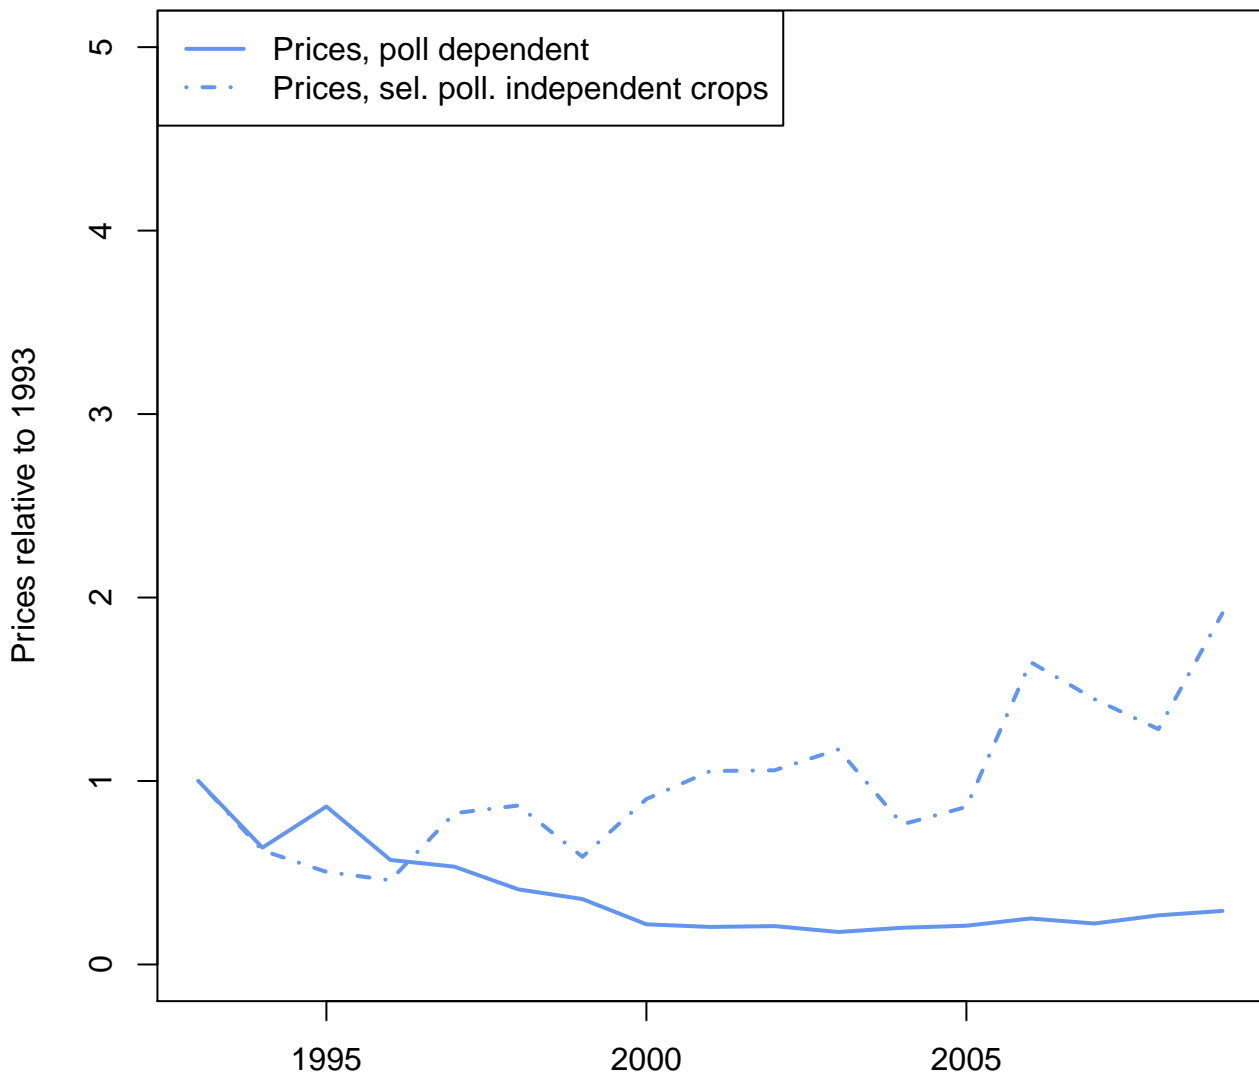

# Saudi Arabia

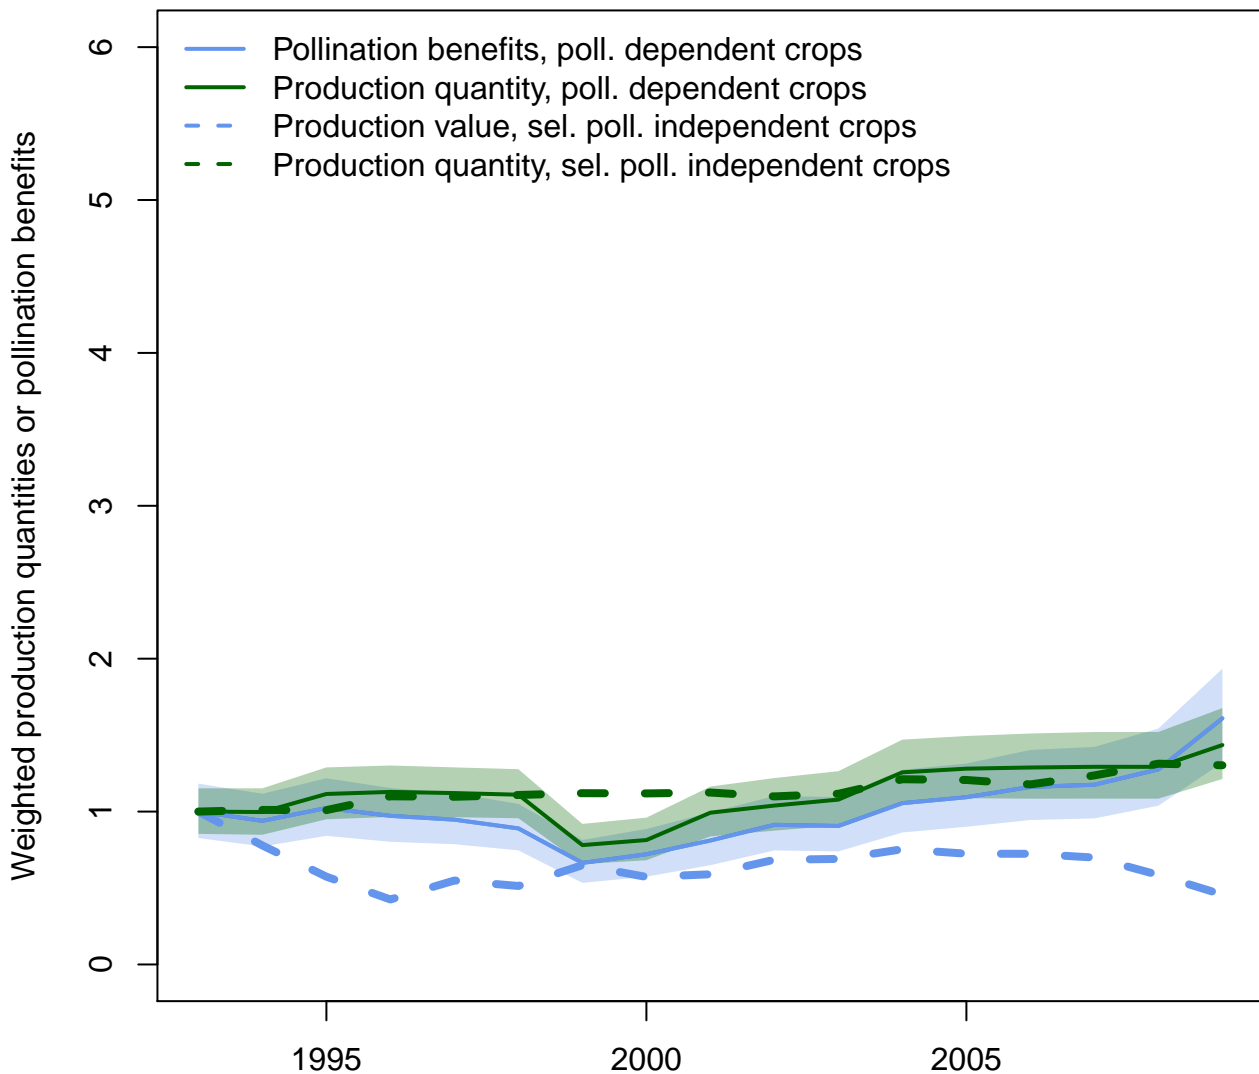

# Saudi Arabia

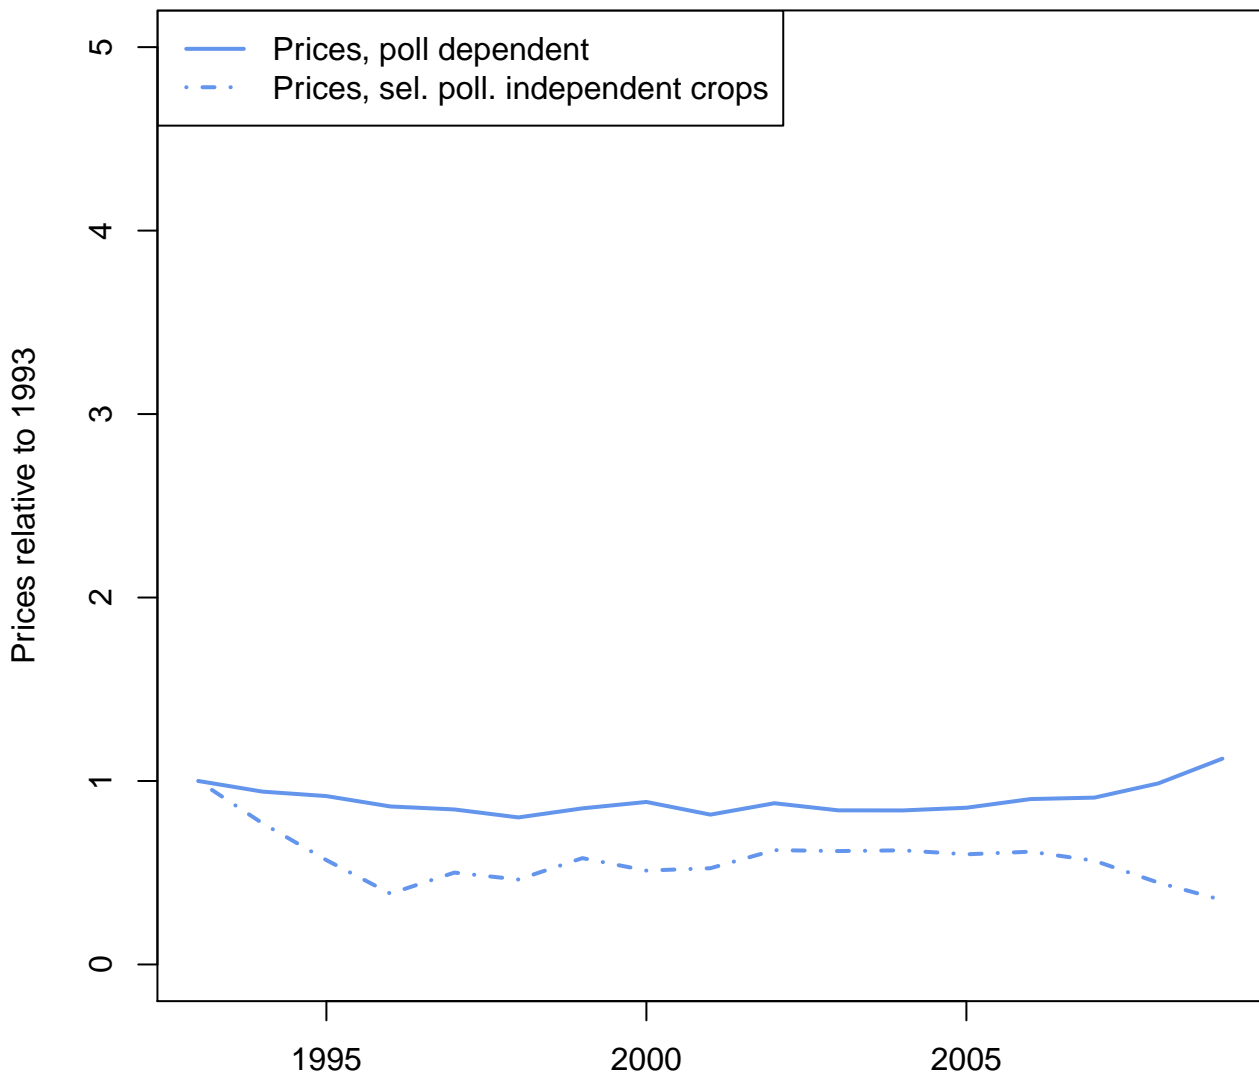

# Serbia

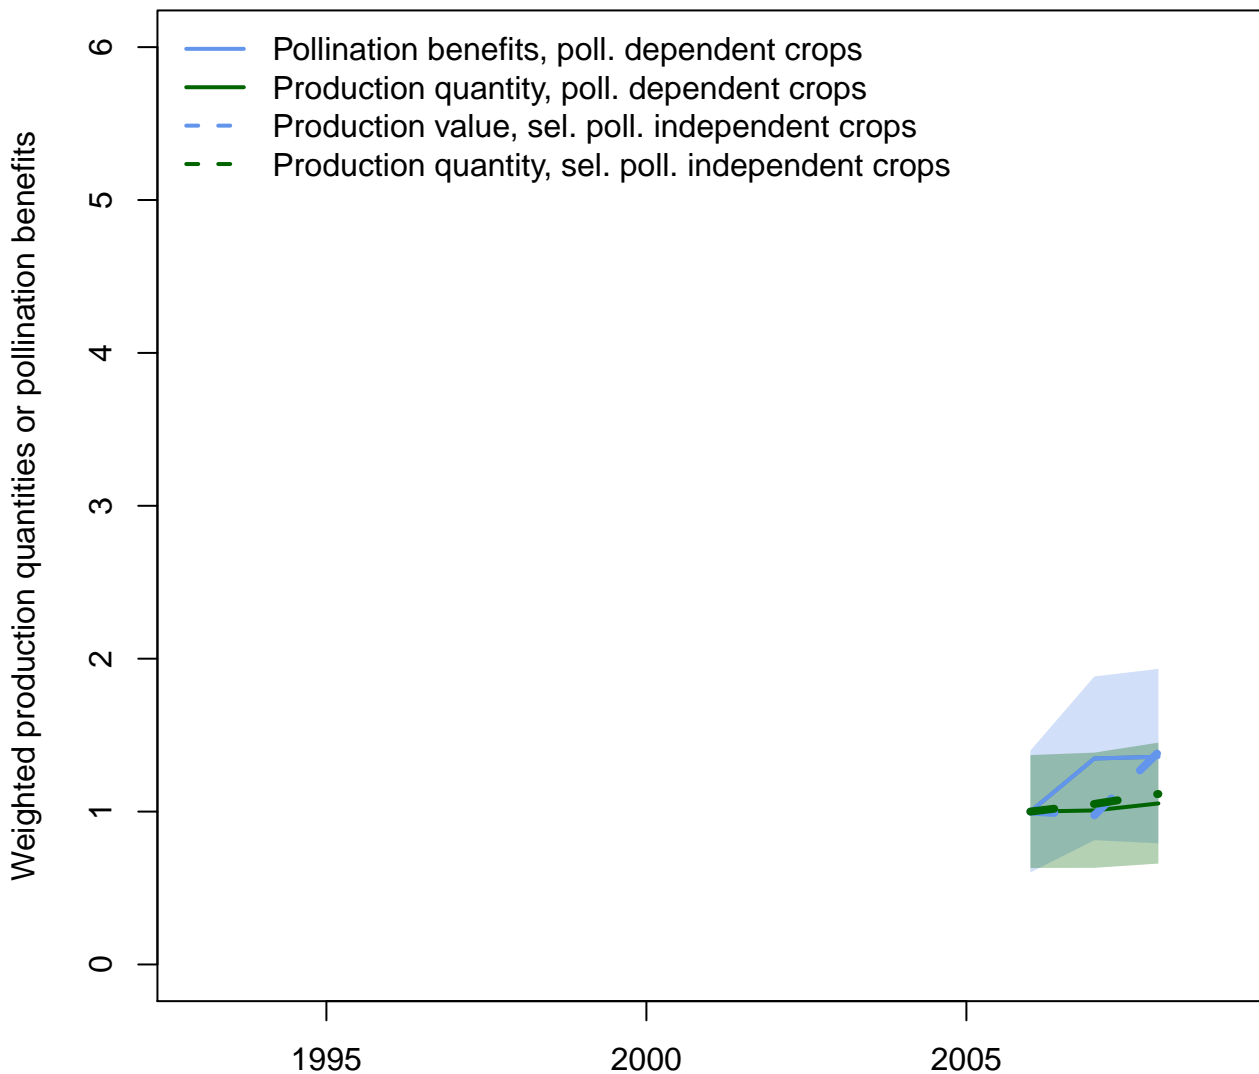

# Serbia

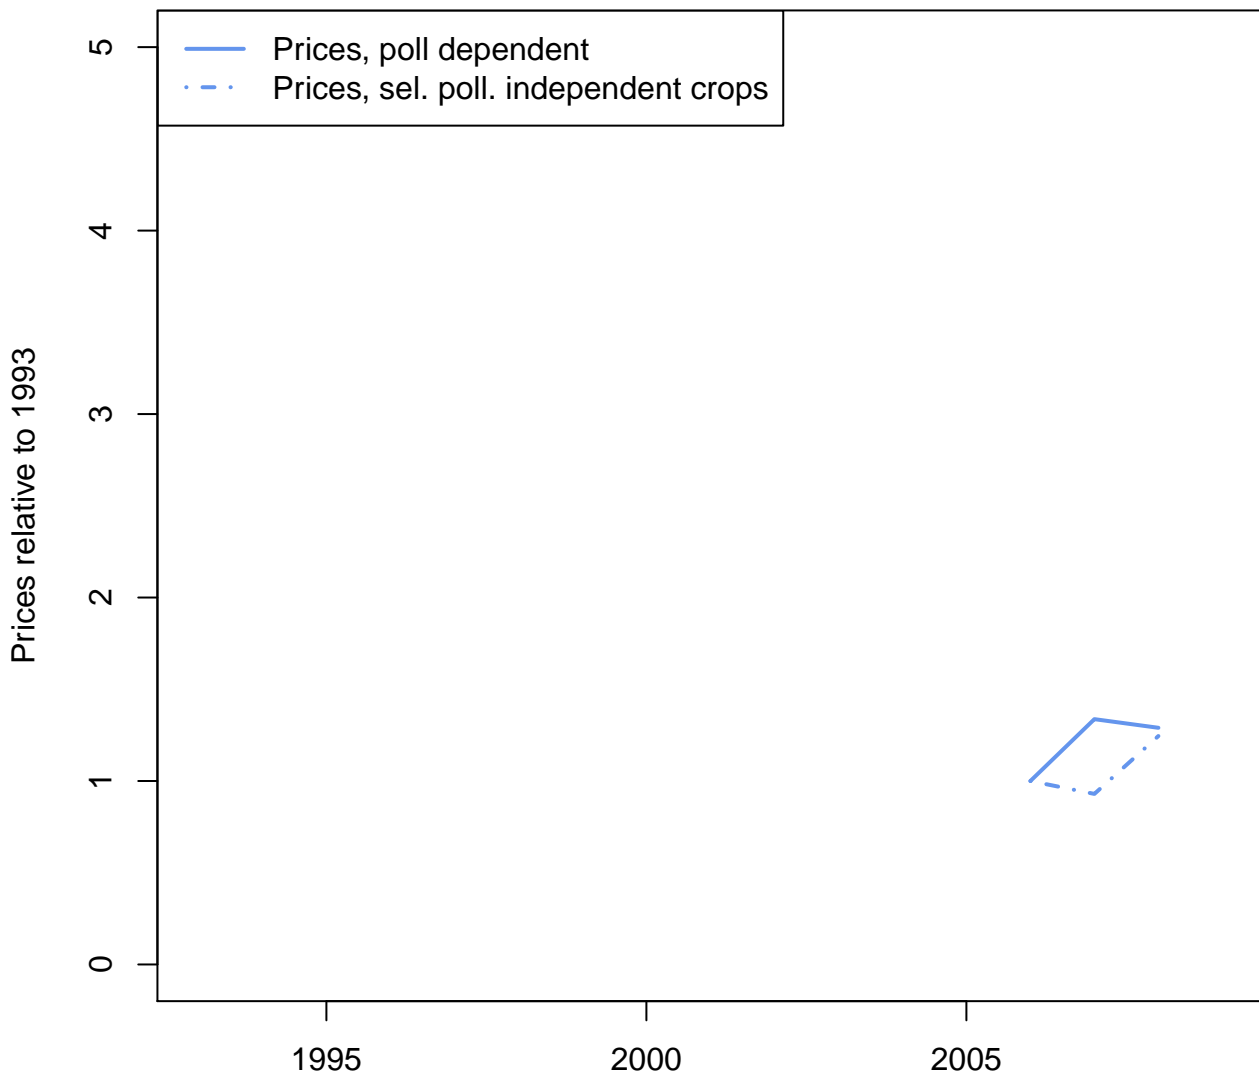

# Slovakia

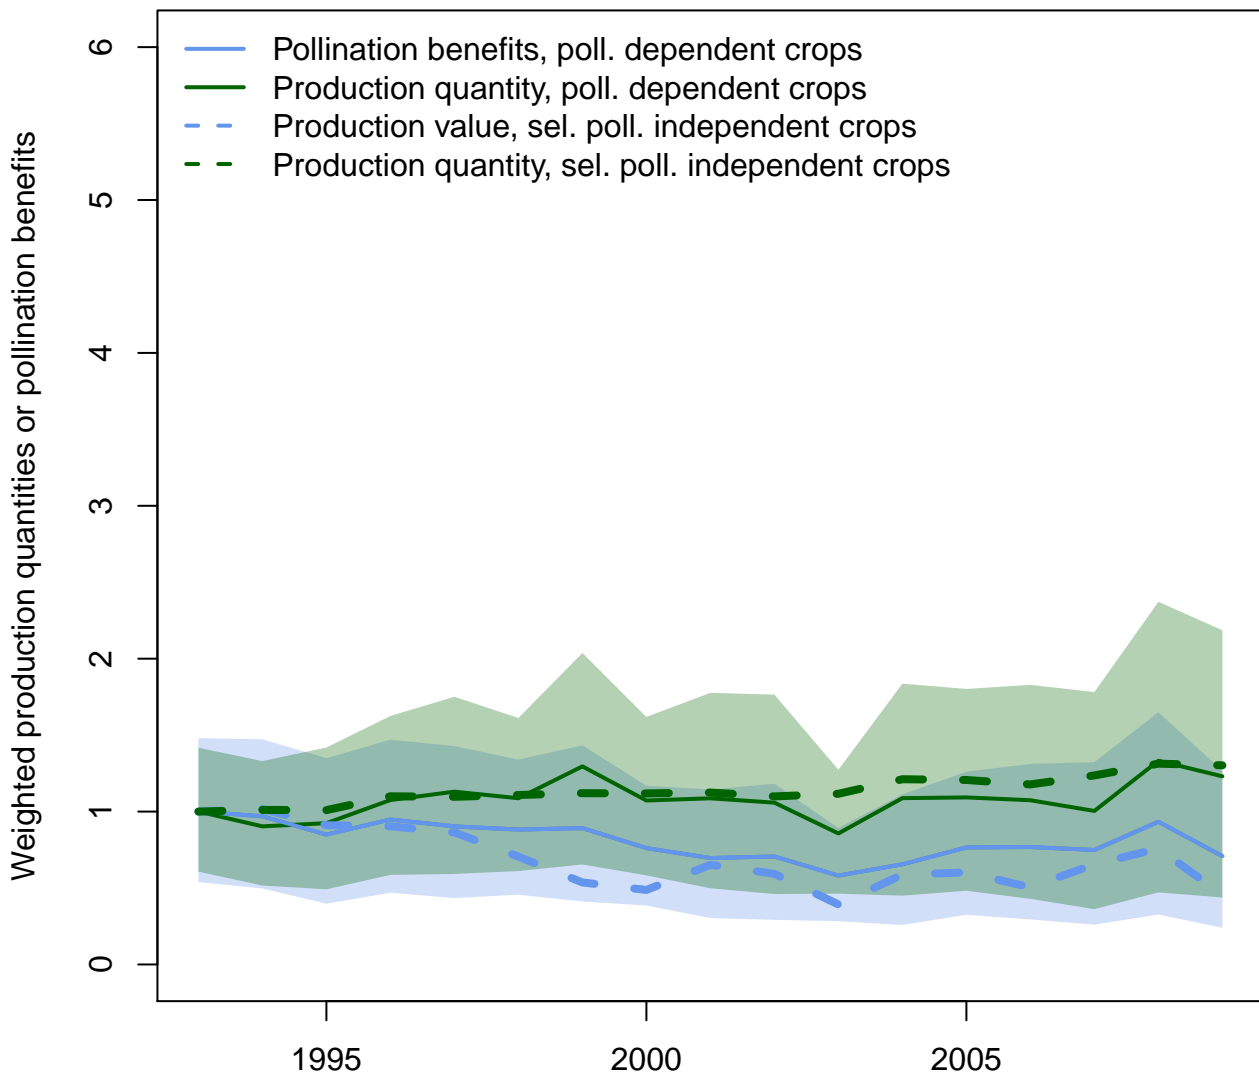

# Slovakia

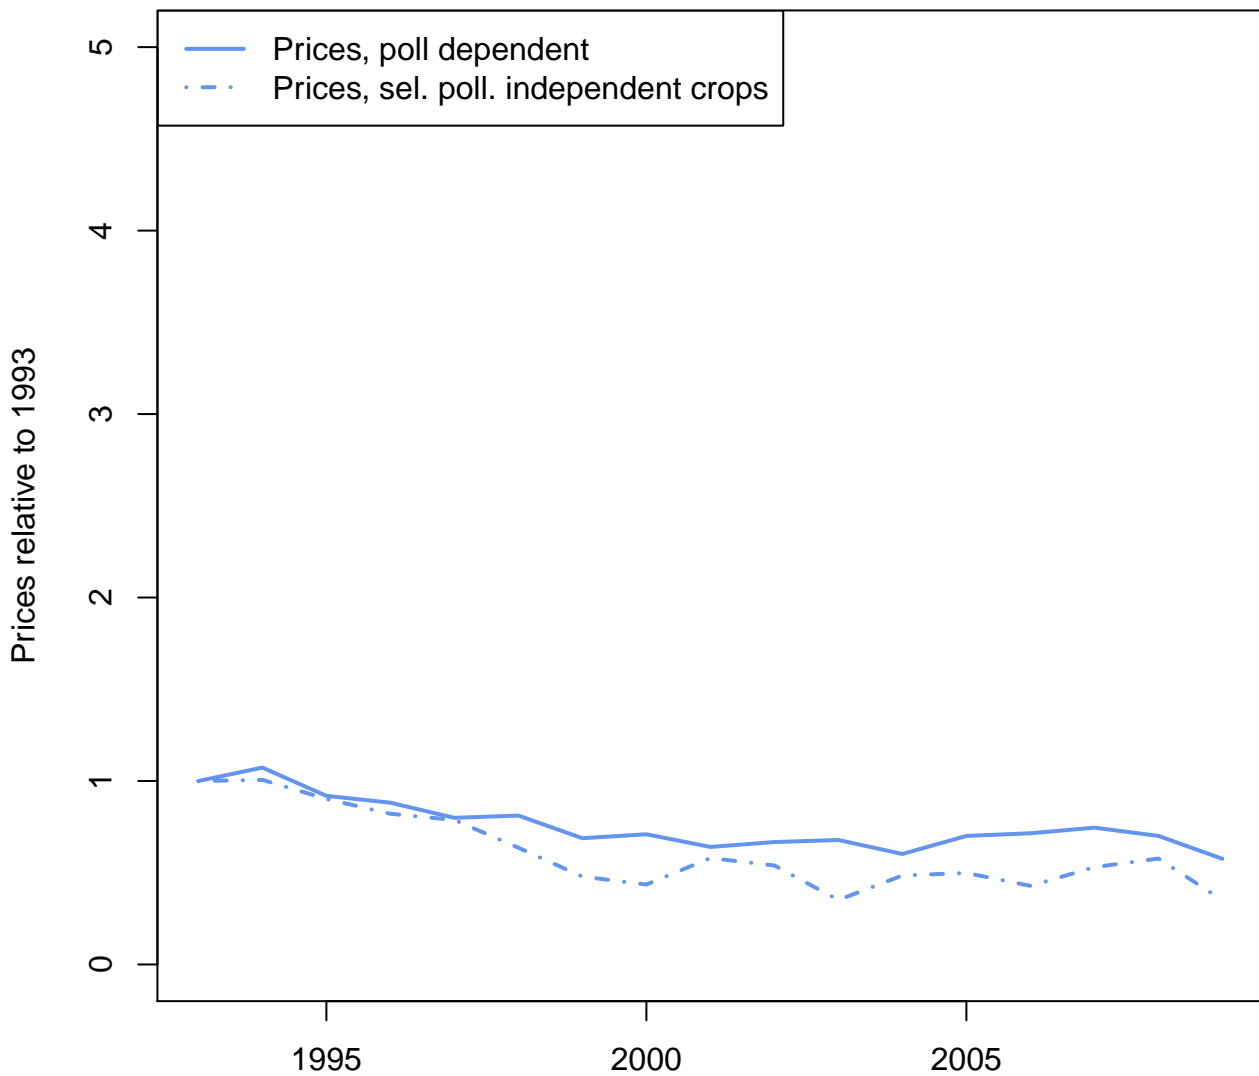

# Slovenia

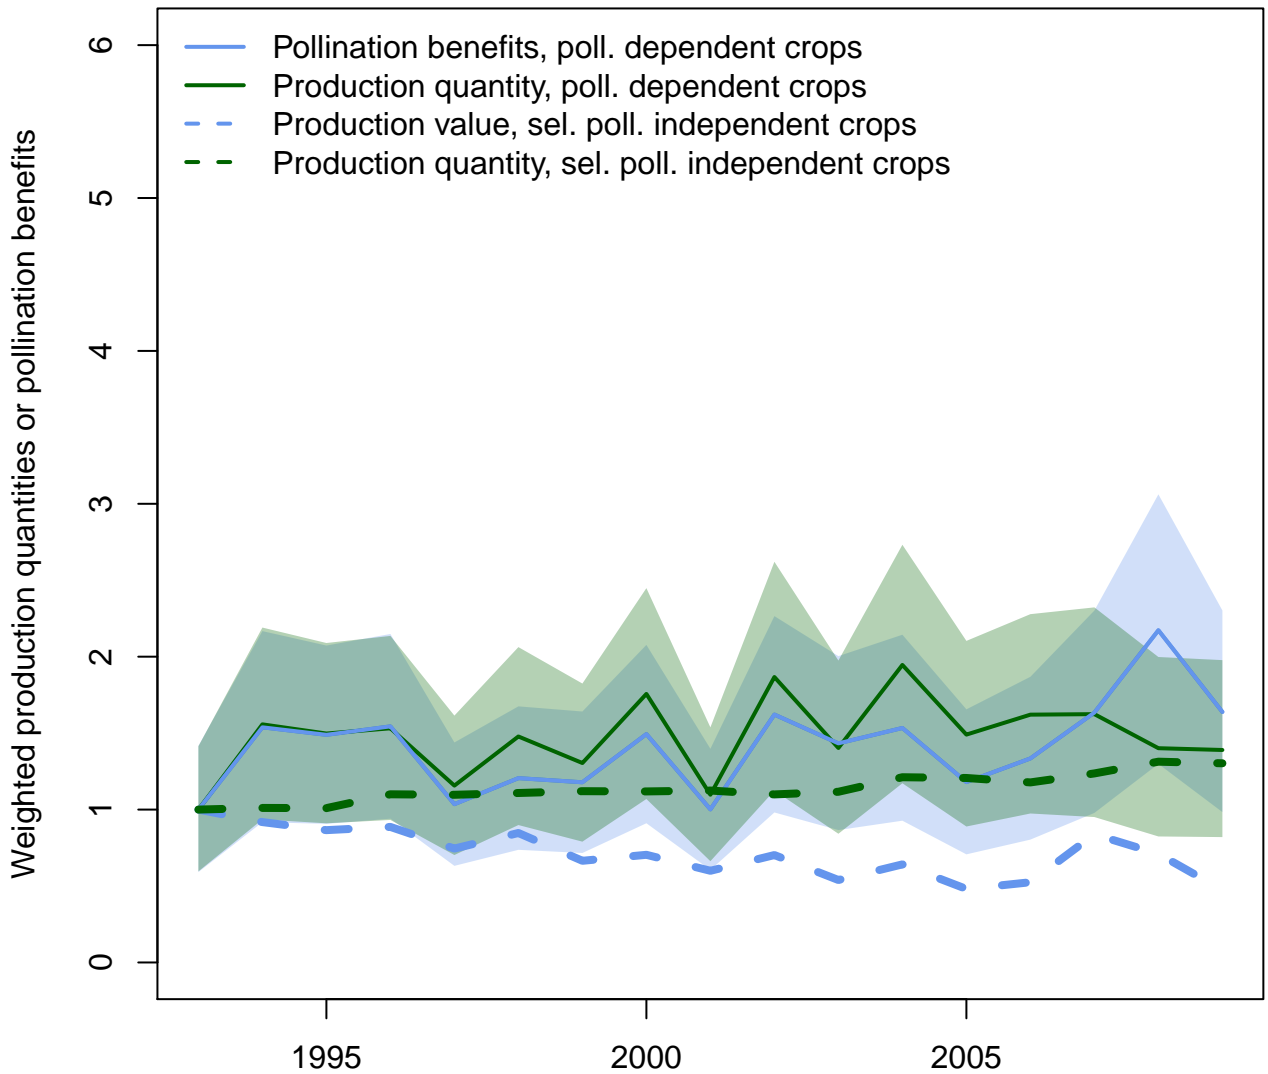



# Slovenia

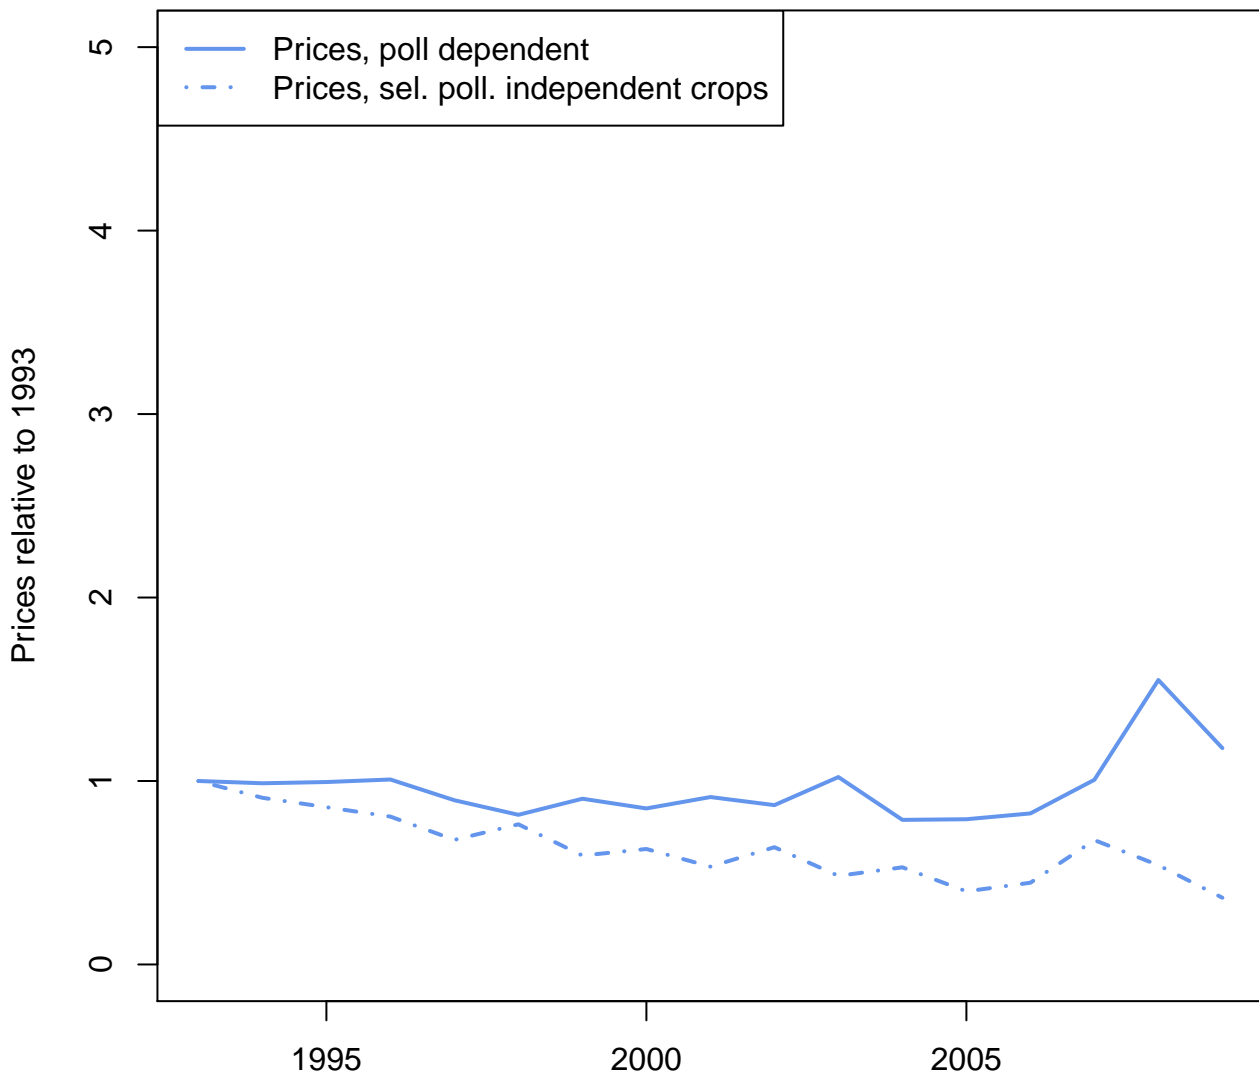

## South Africa

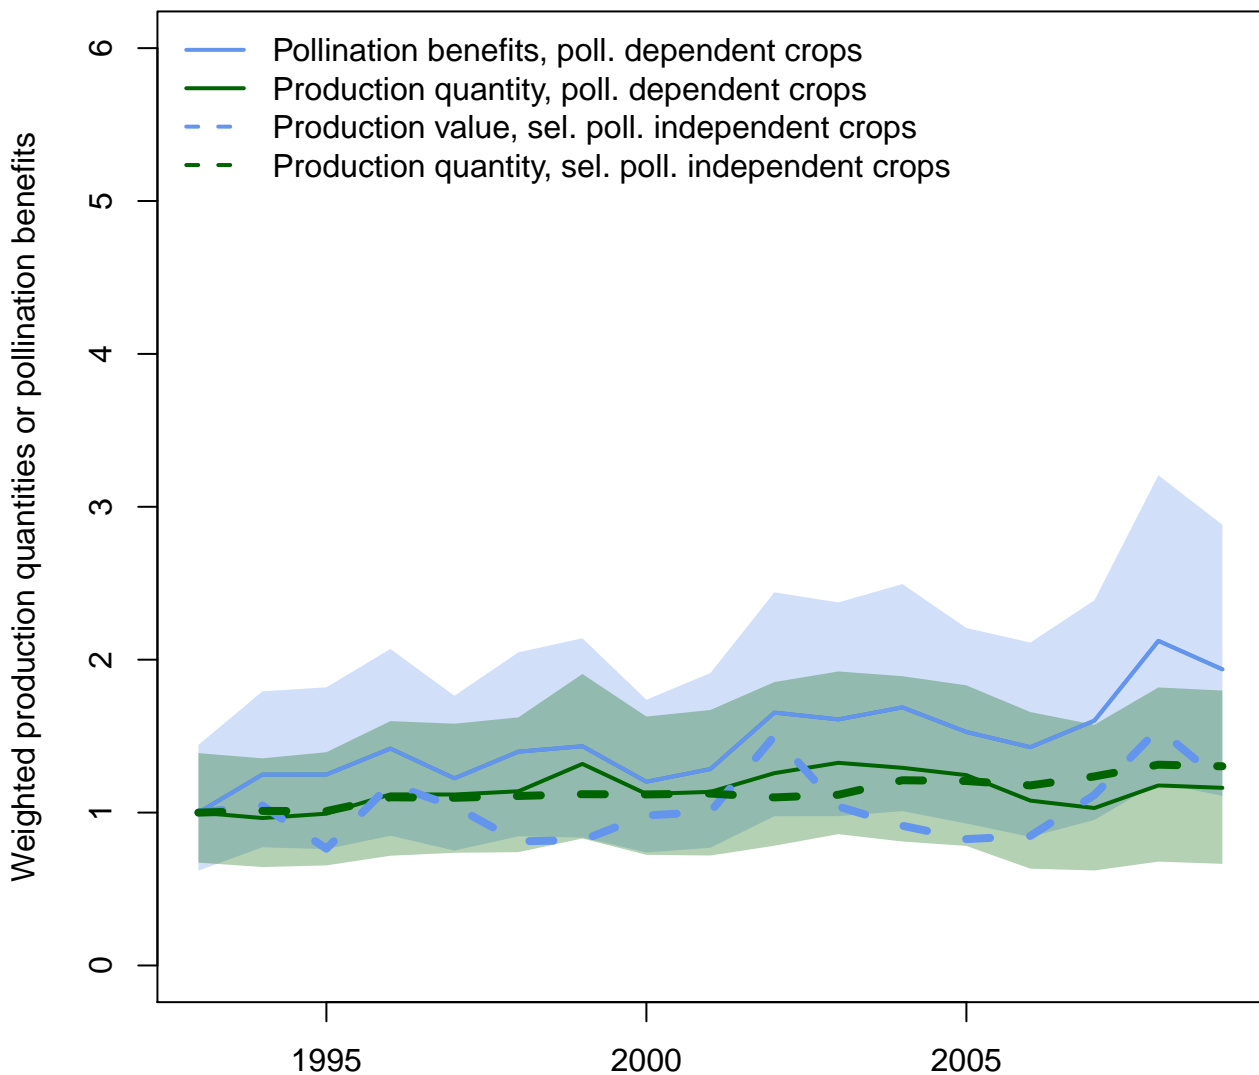

## South Africa

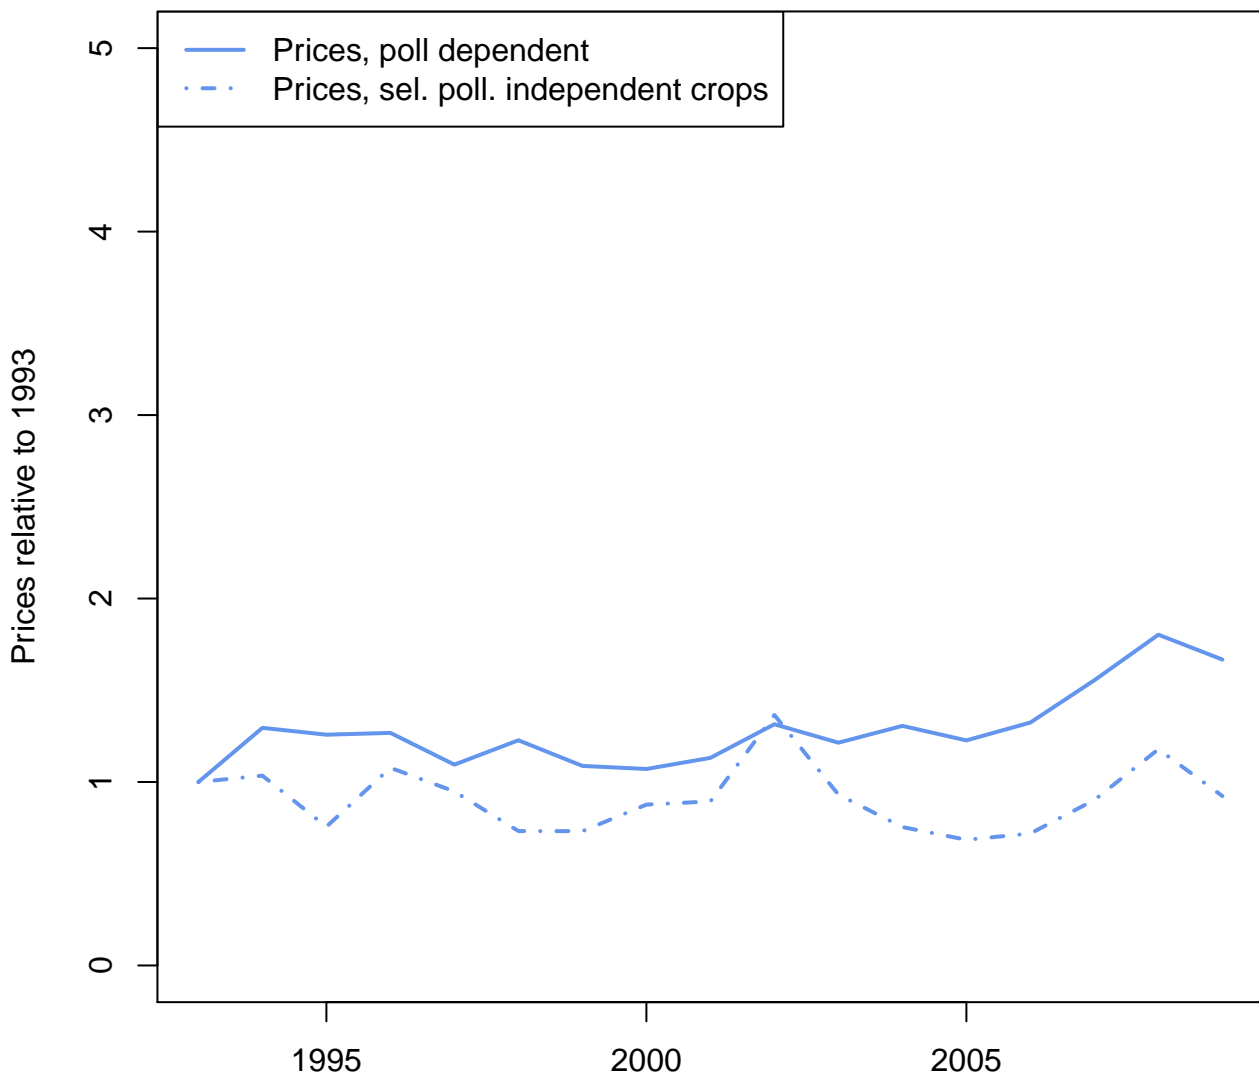

# Spain

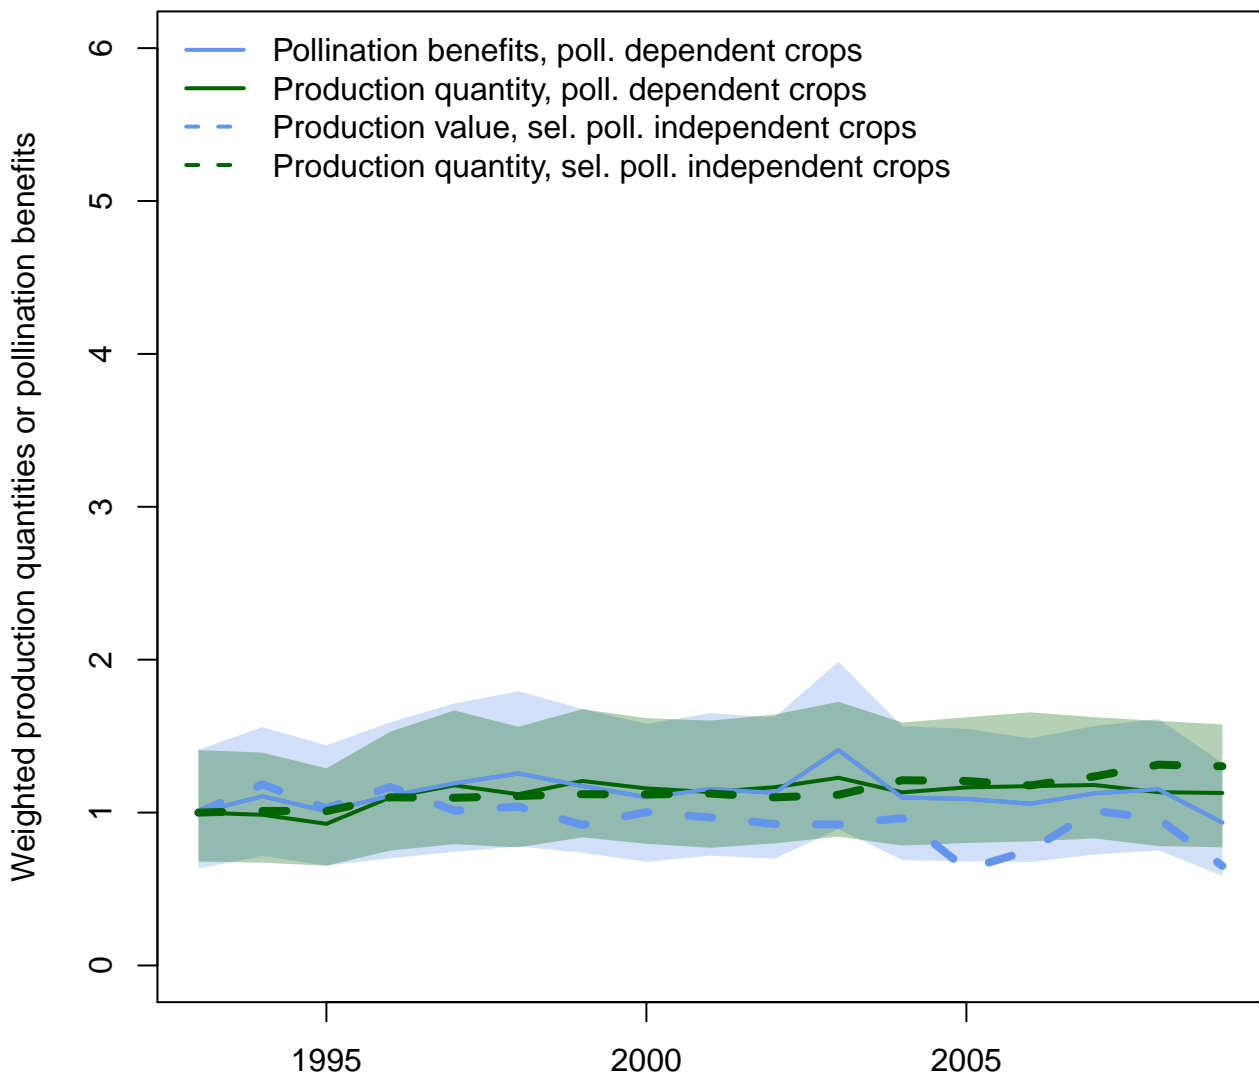

# Spain

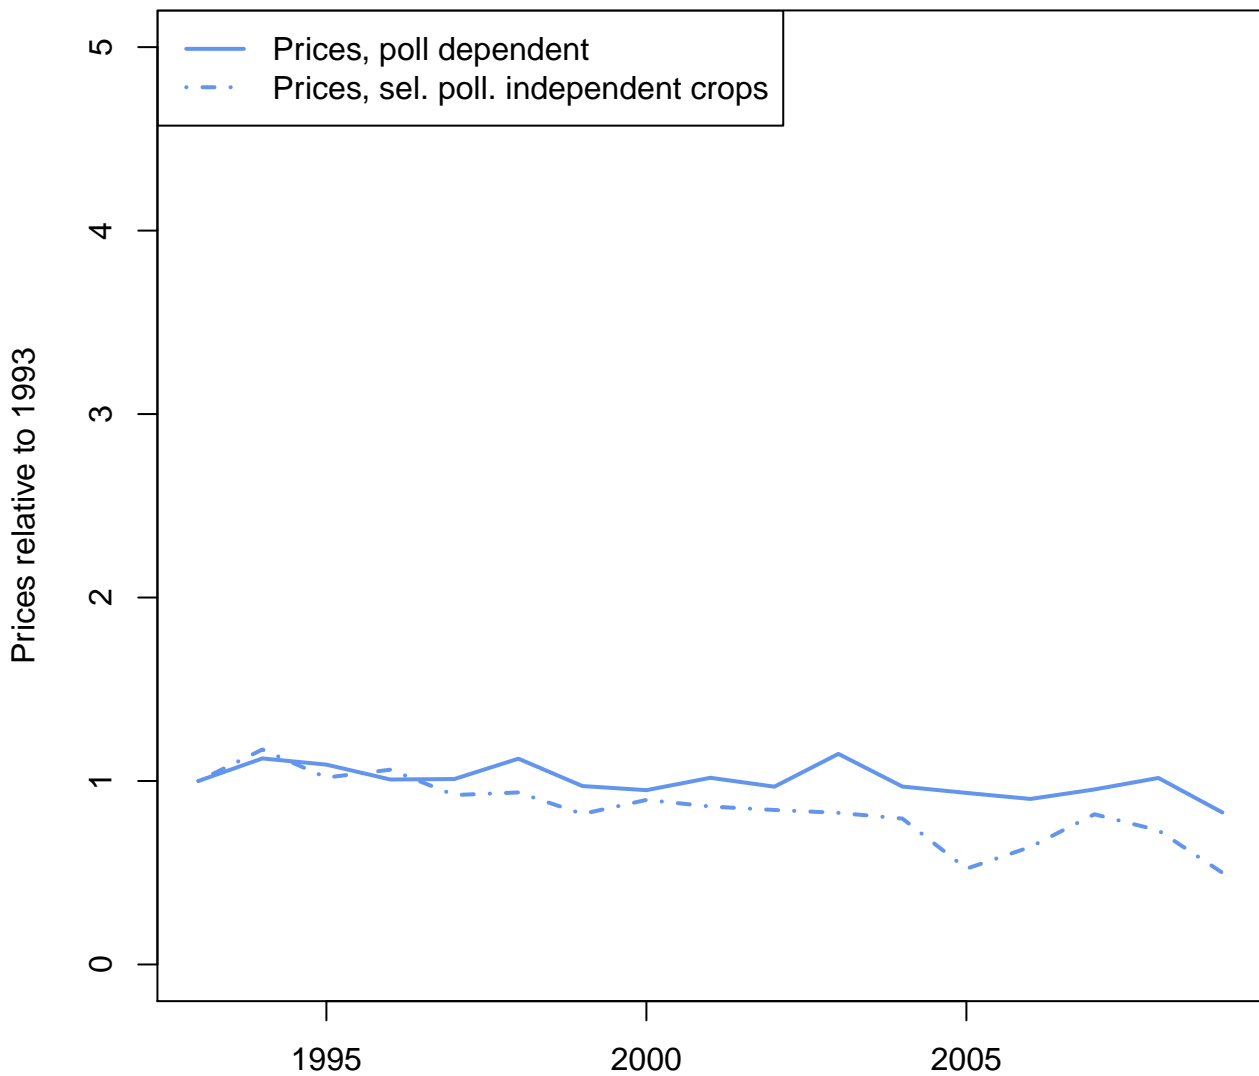

## Sri Lanka

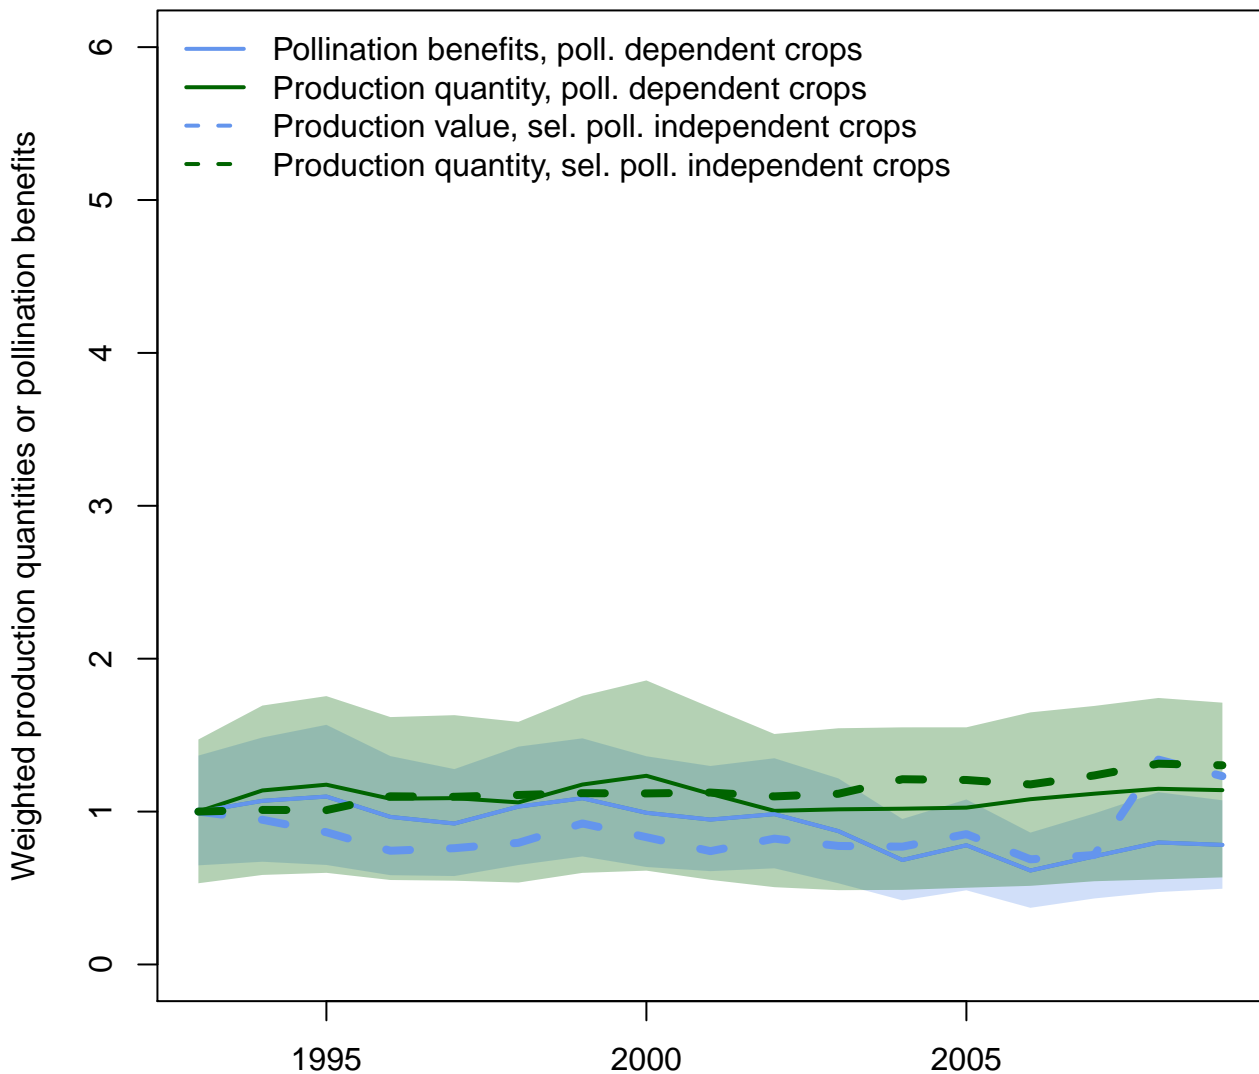

# Sri Lanka

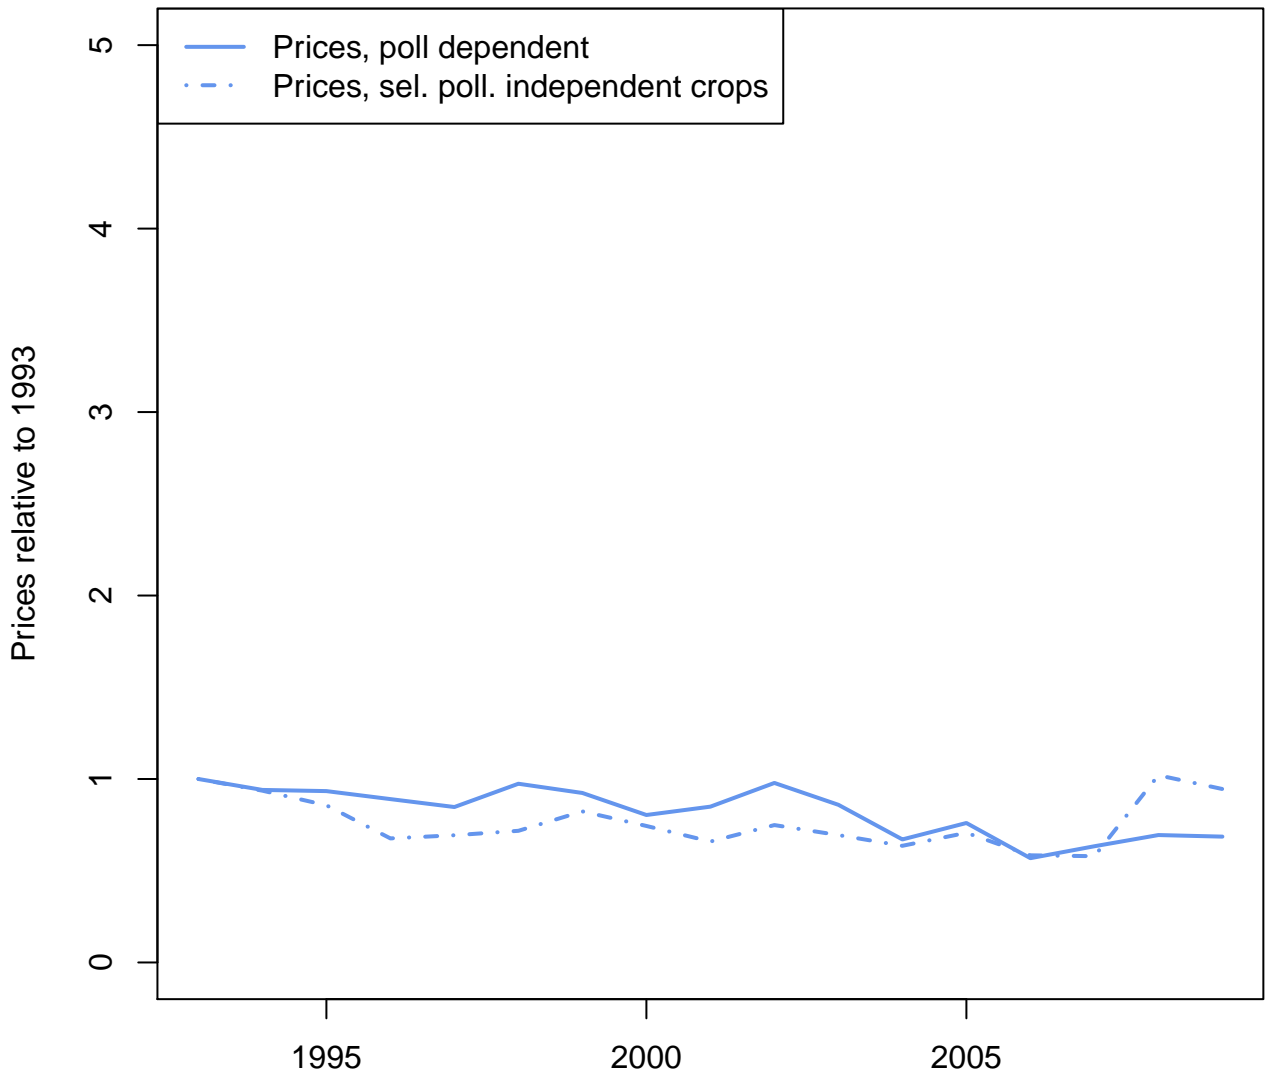

# Sudan

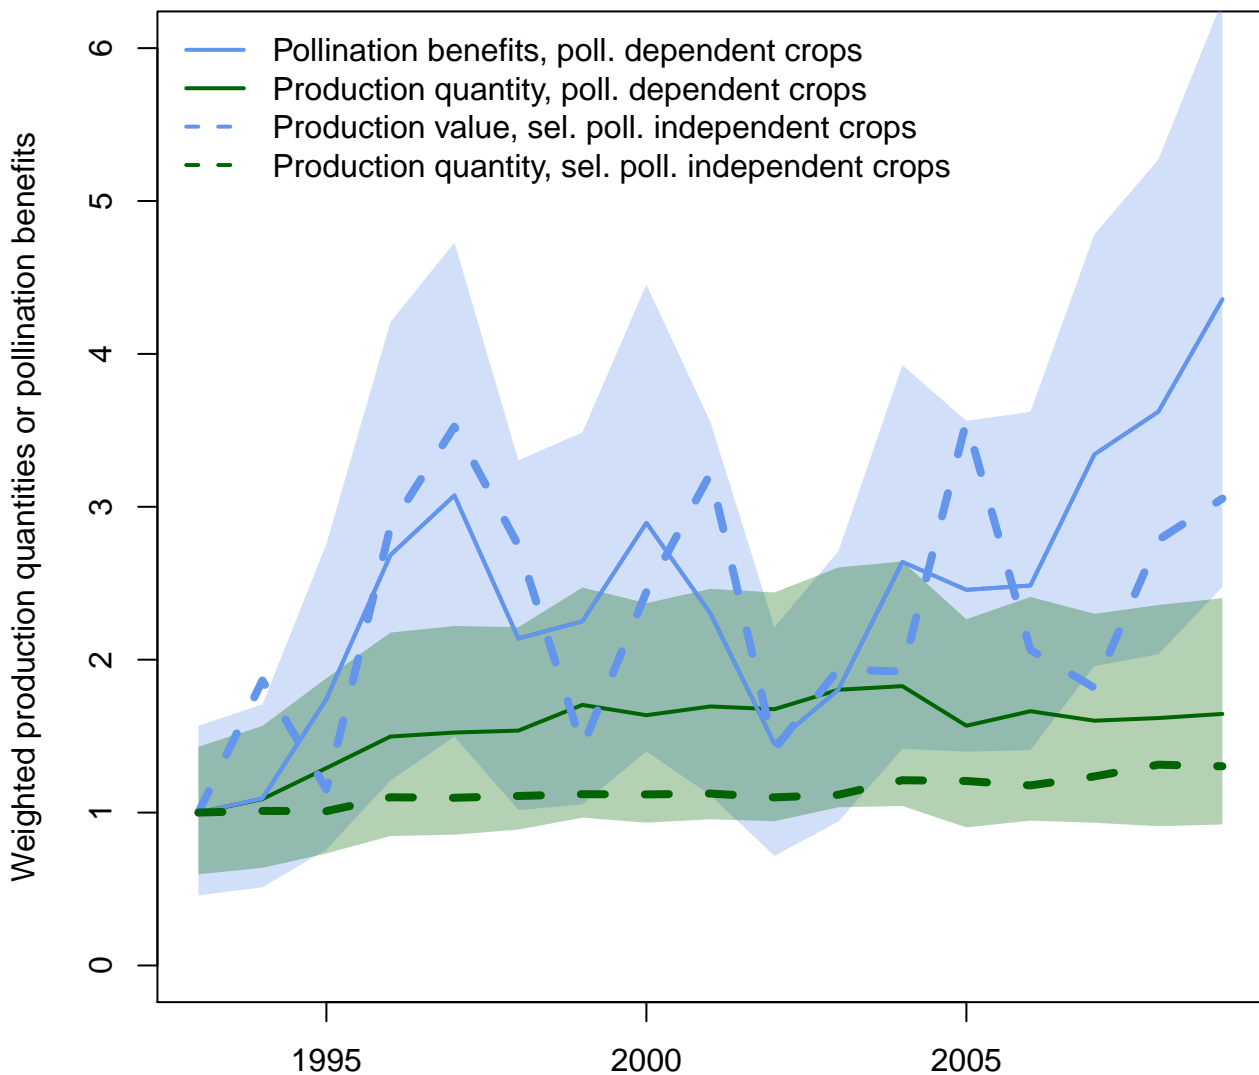



# Sudan

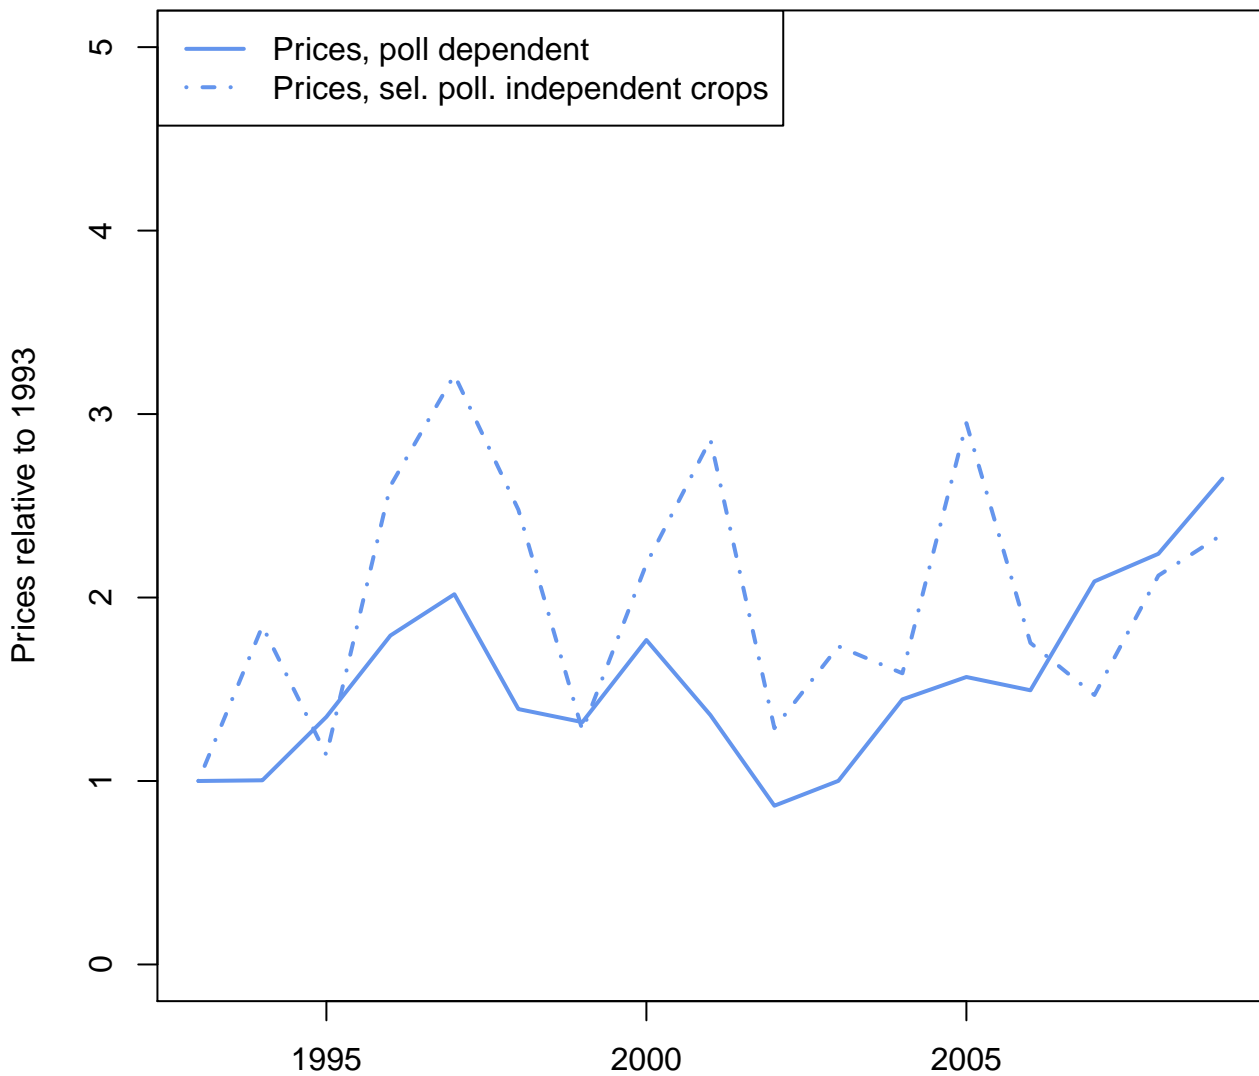

# Suriname

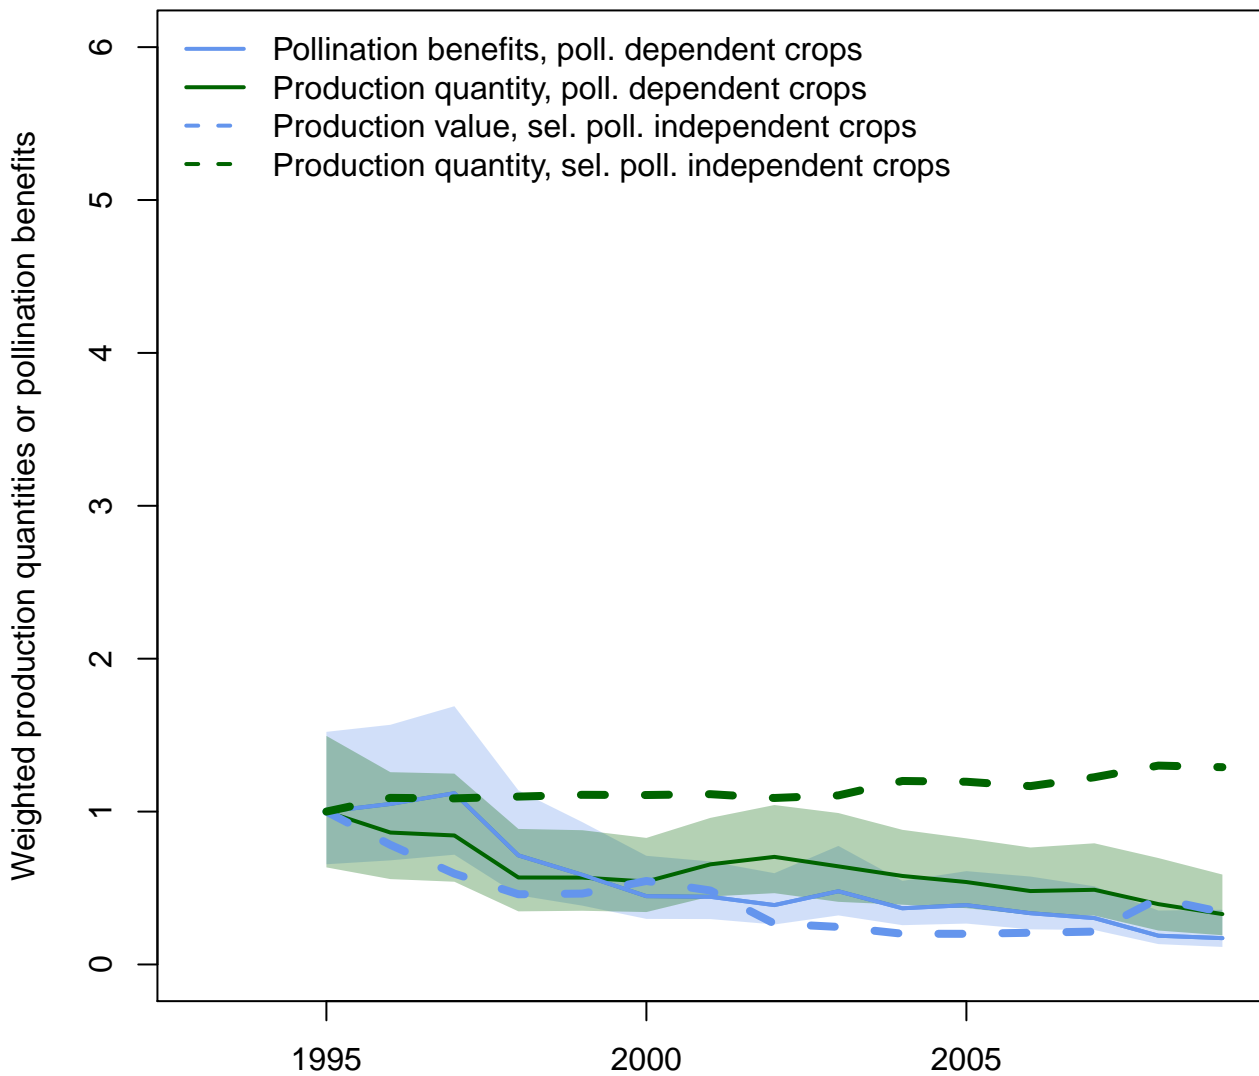

# Suriname

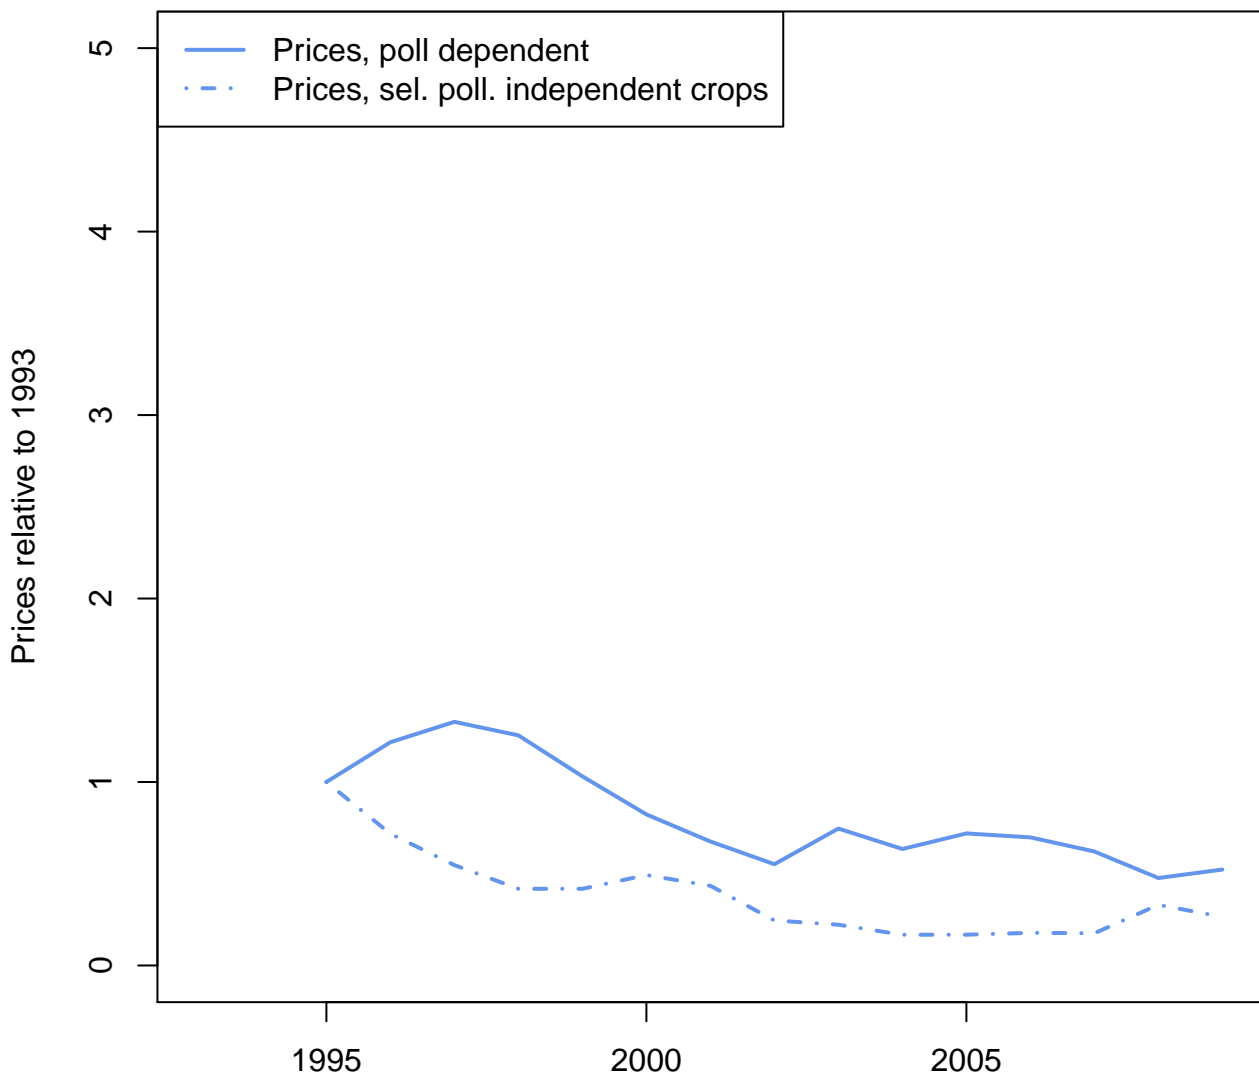

# Sweden

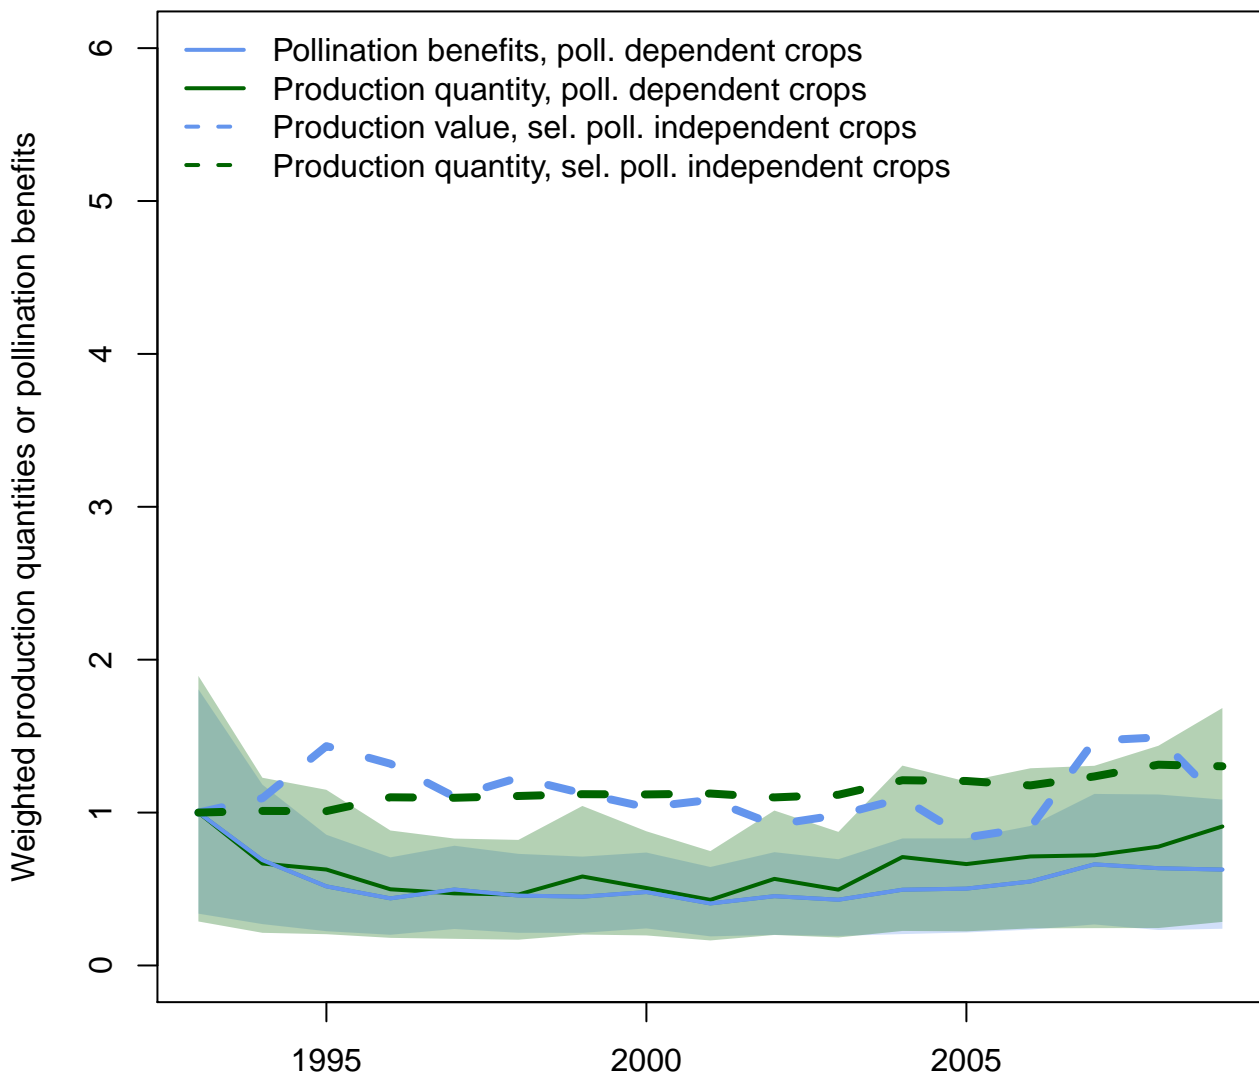

# Sweden

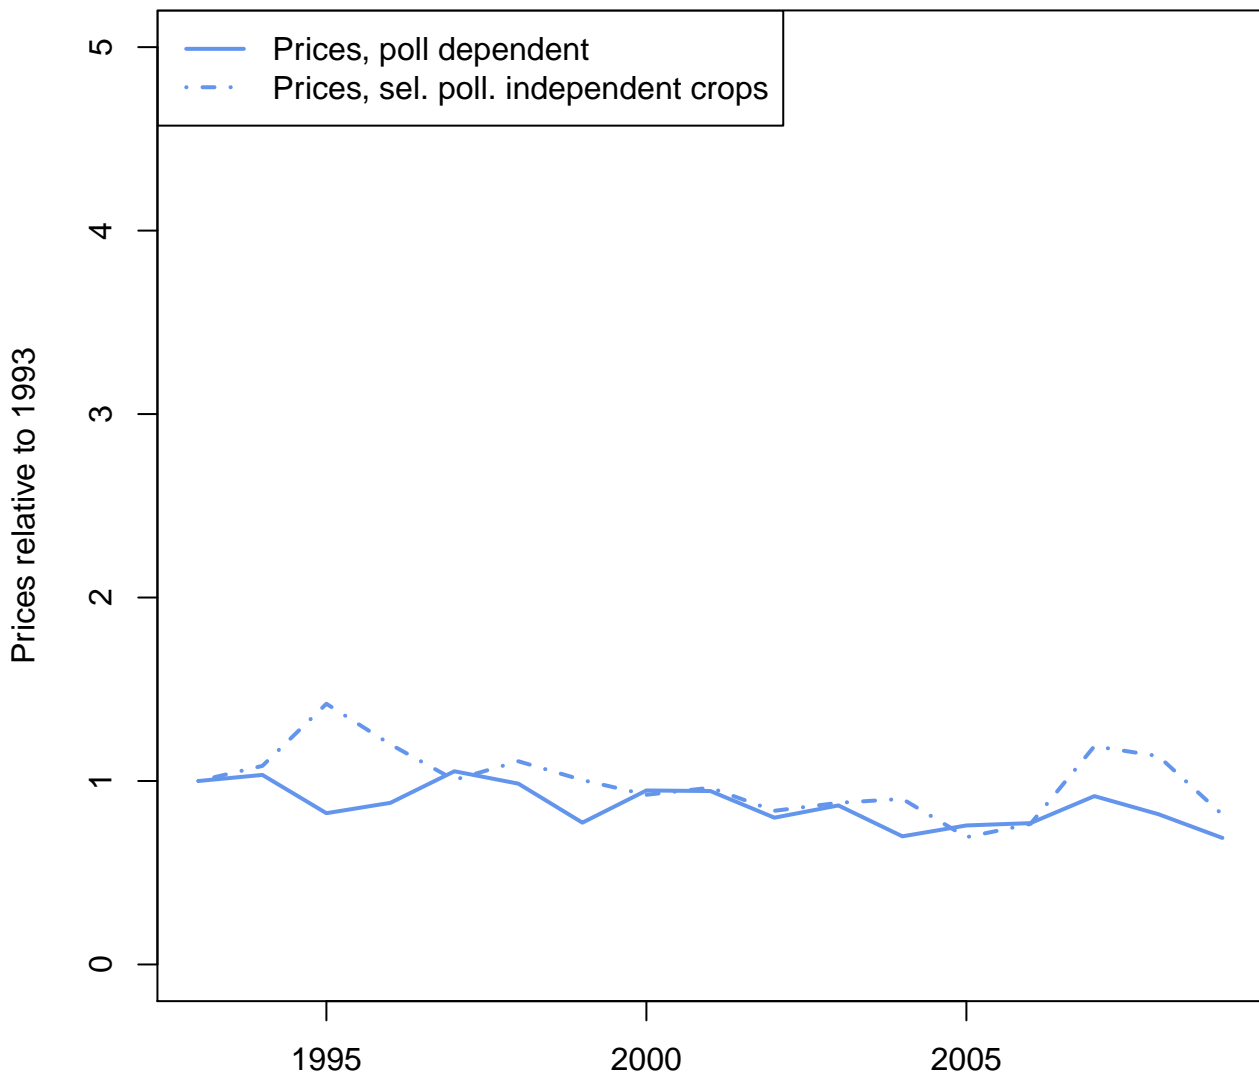

# Switzerland

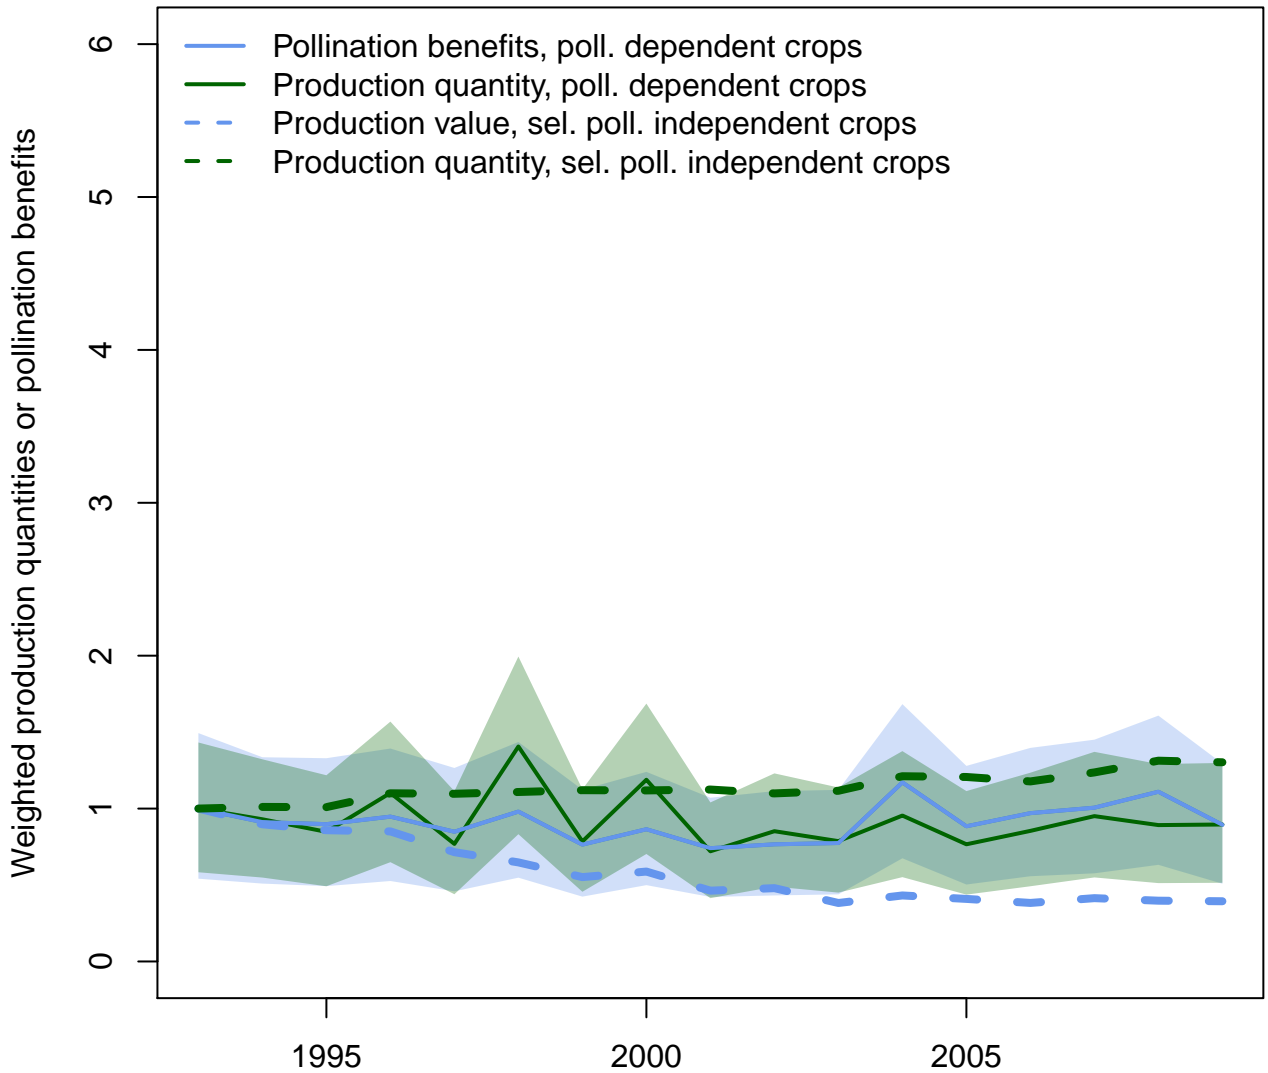

# Switzerland

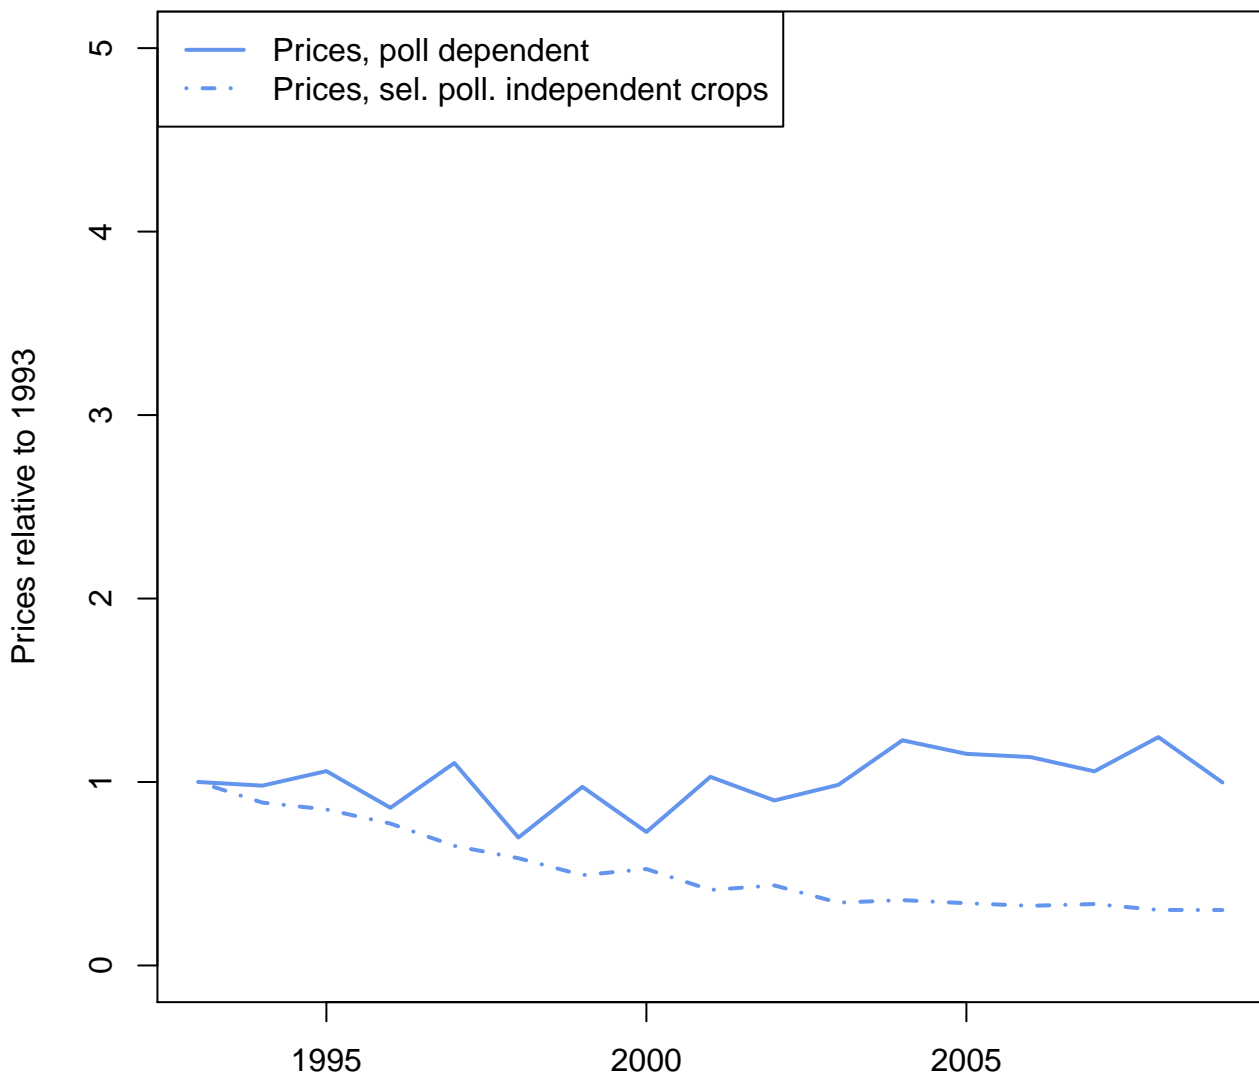

# Tajikistan

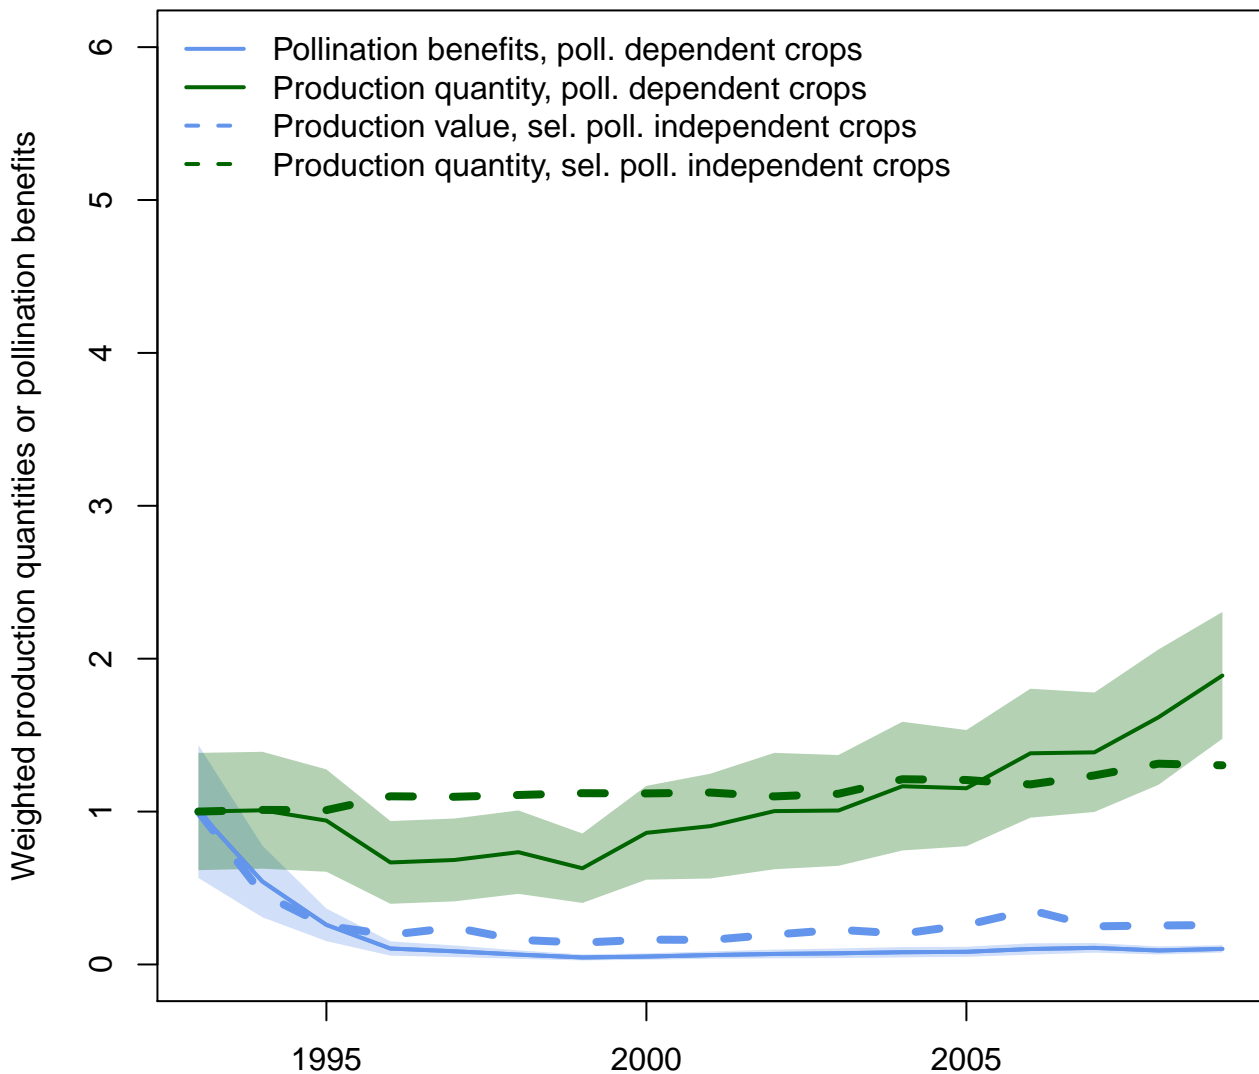



# Tajikistan

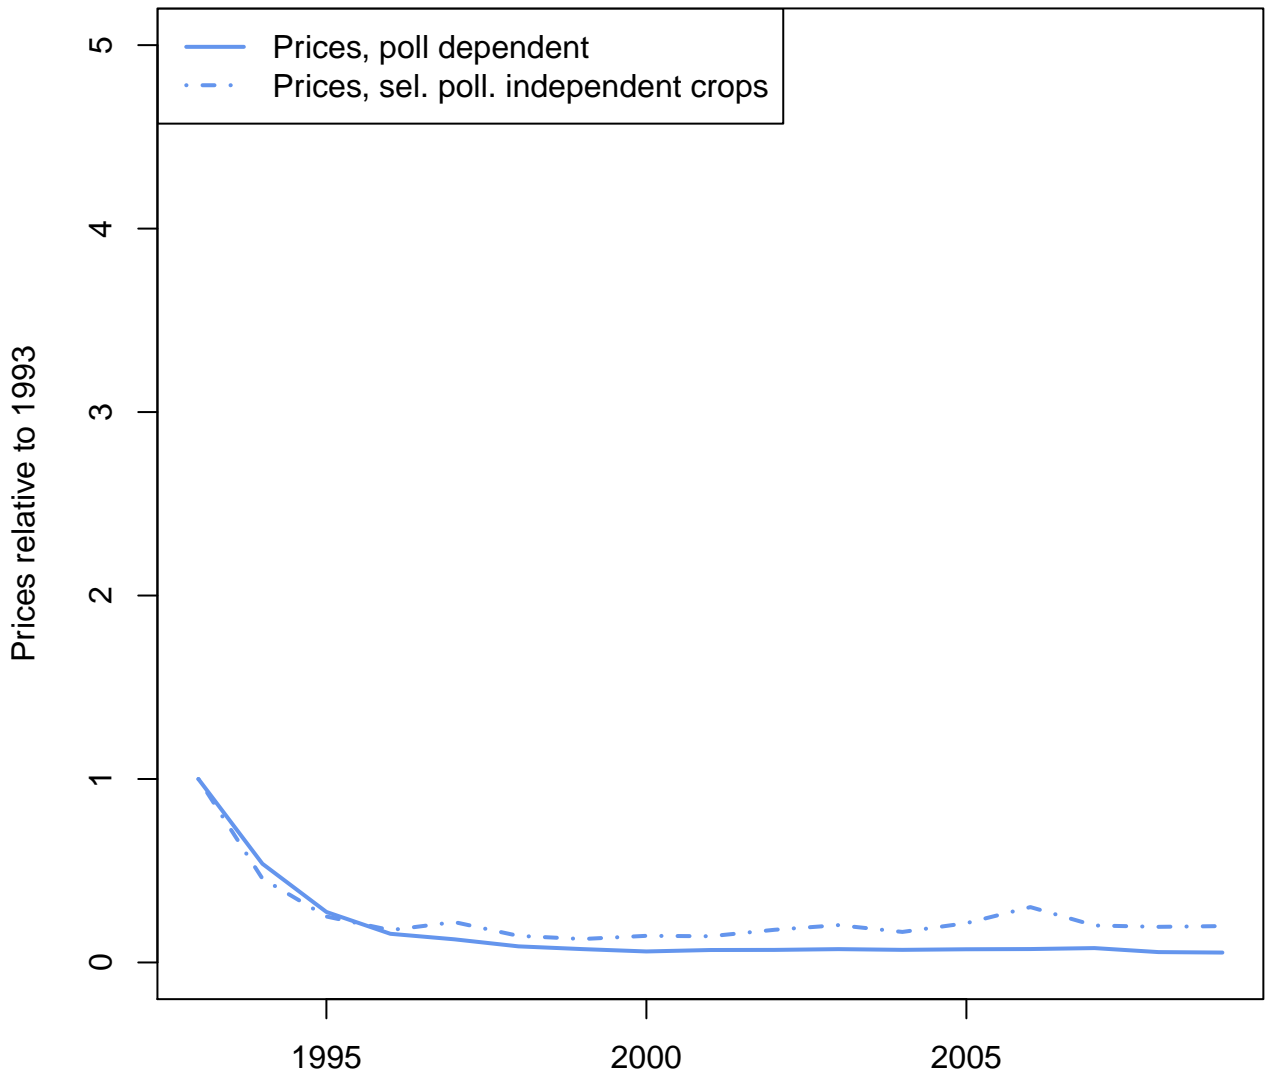

# Thailand

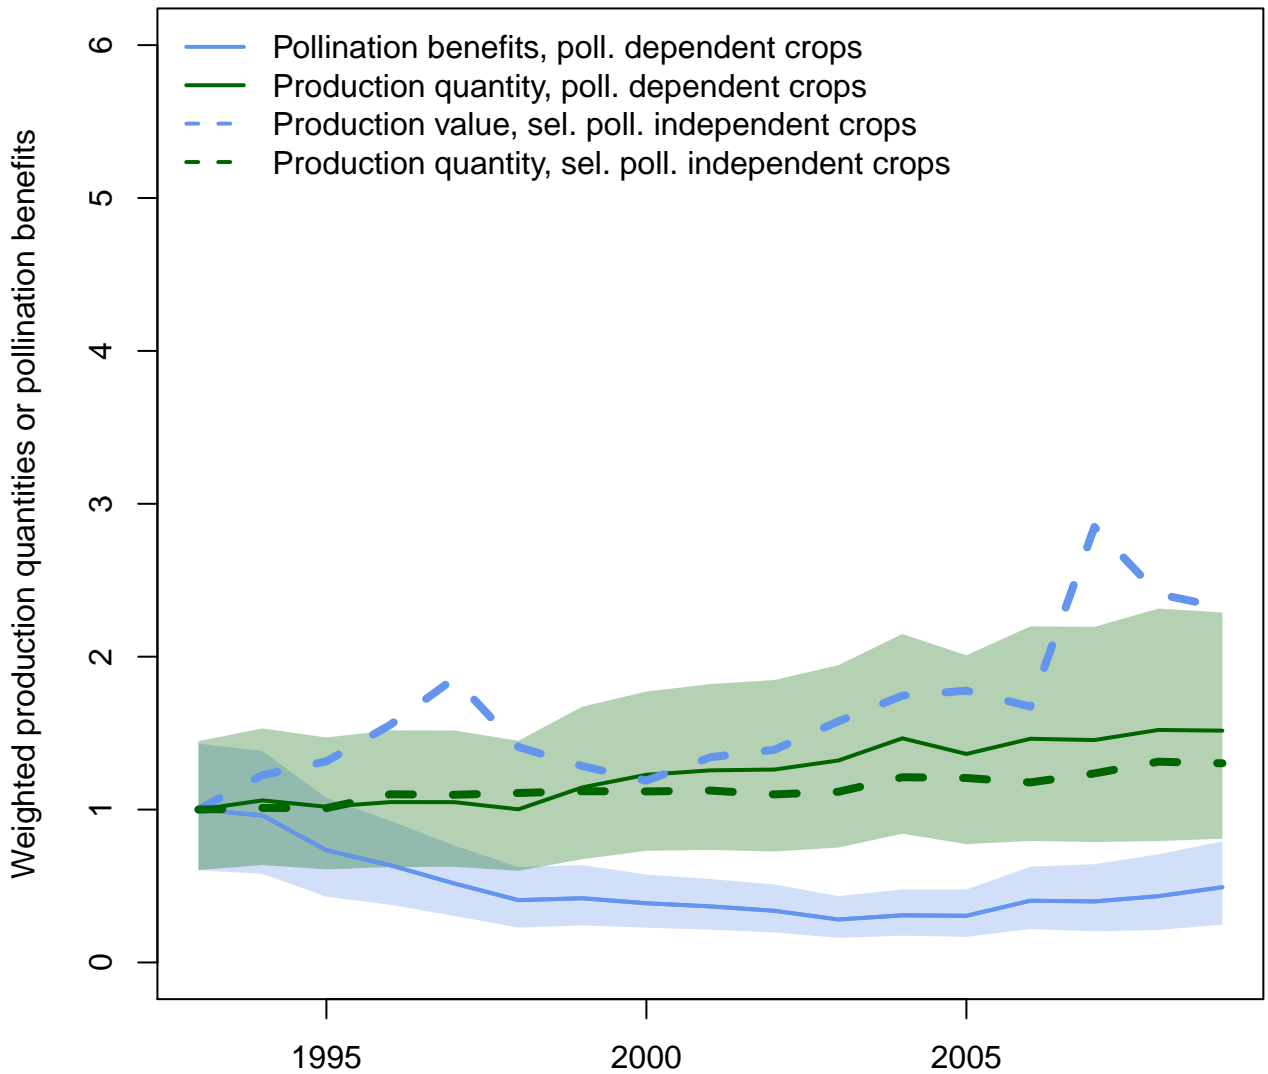

# Thailand

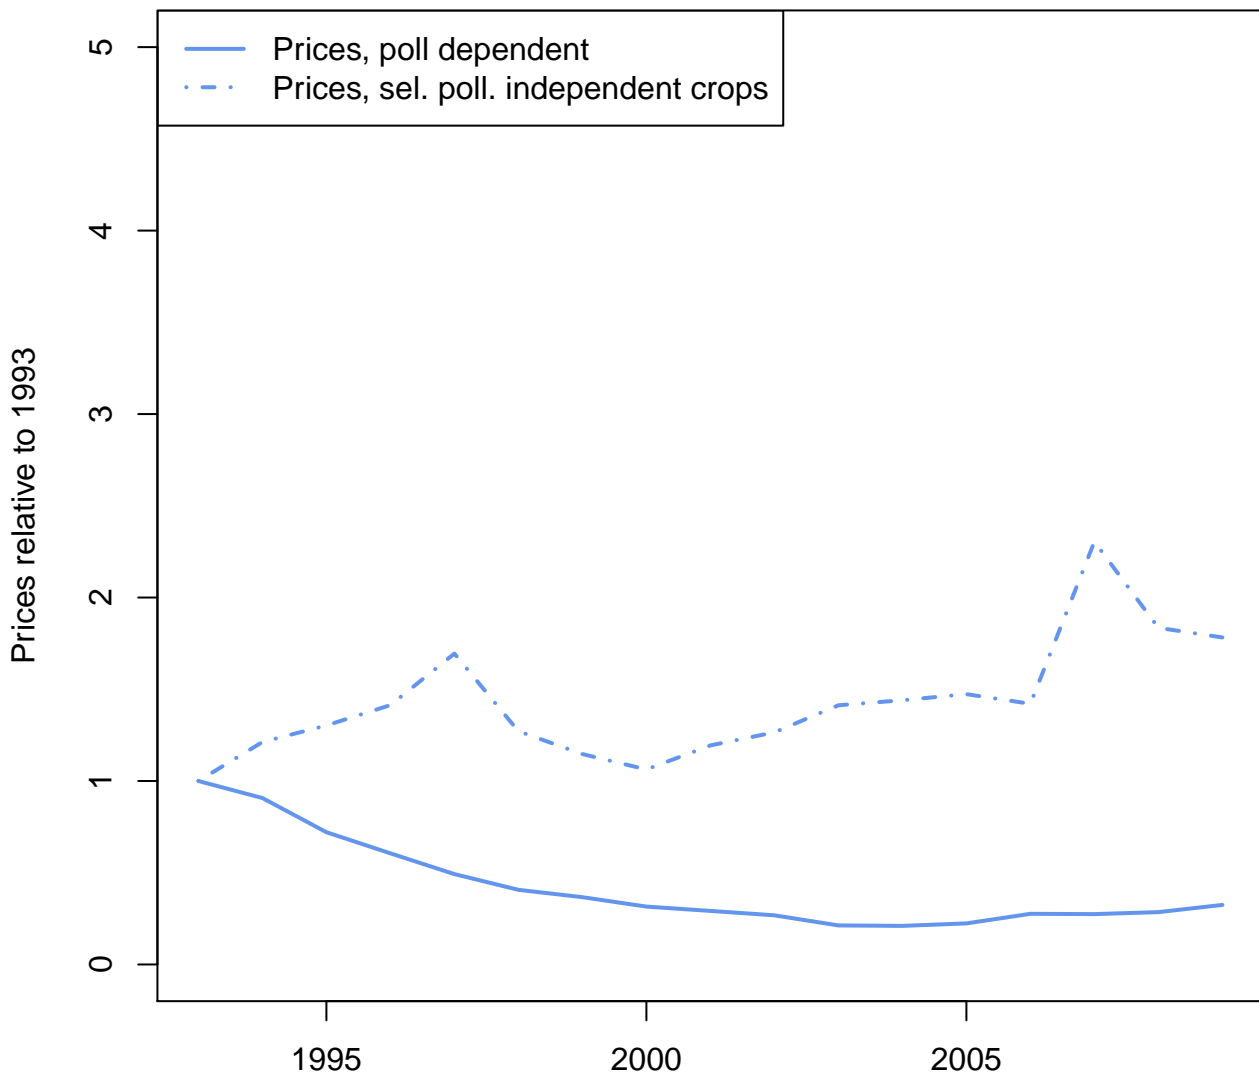

## The former Yugoslav Republic of Macedonia

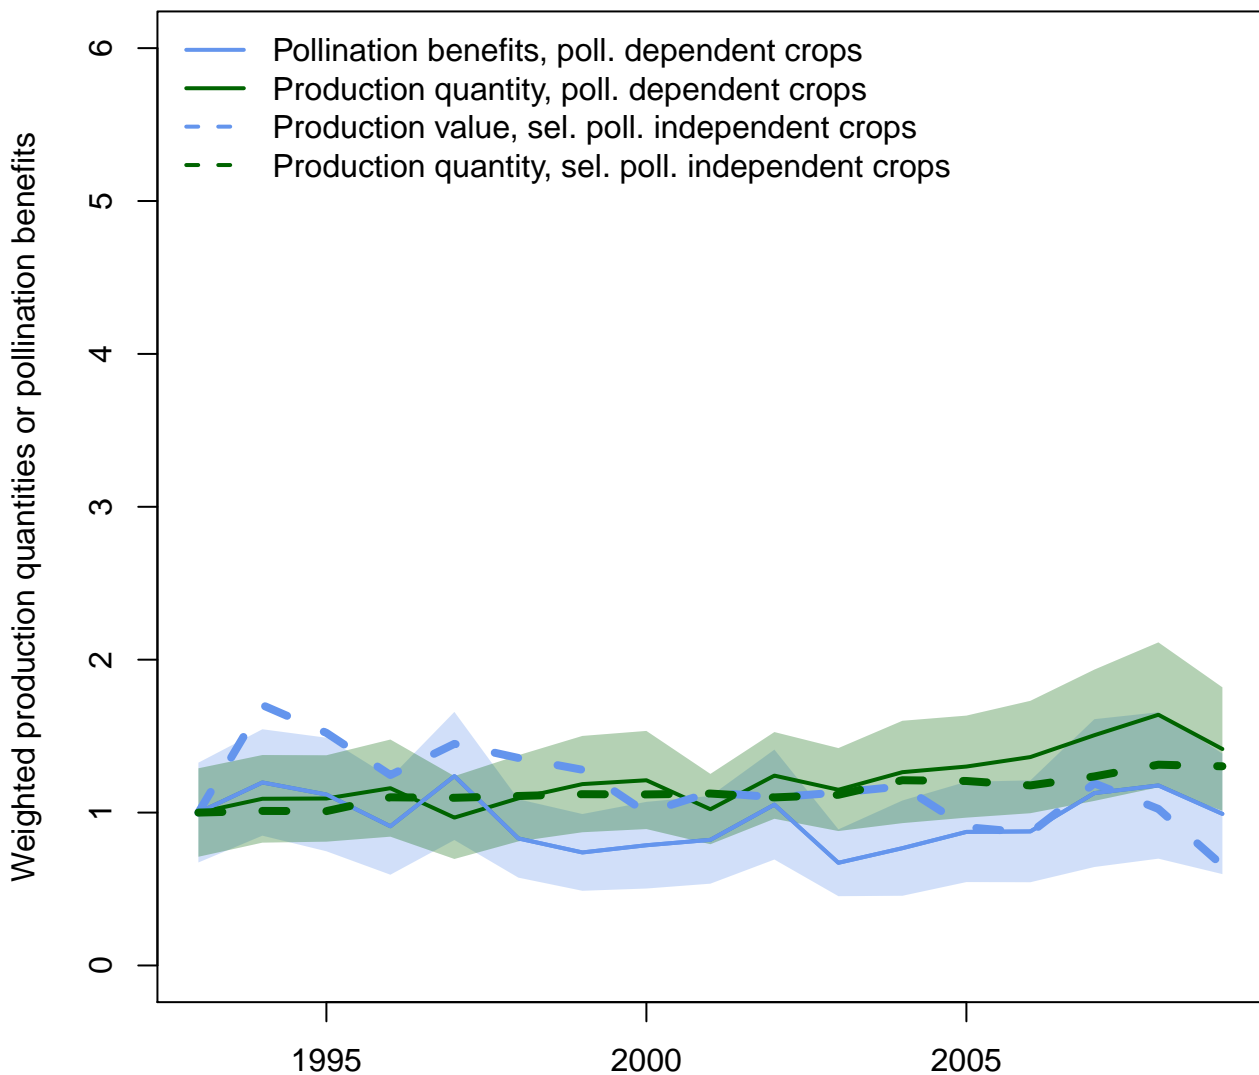

## The former Yugoslav Republic of Macedonia

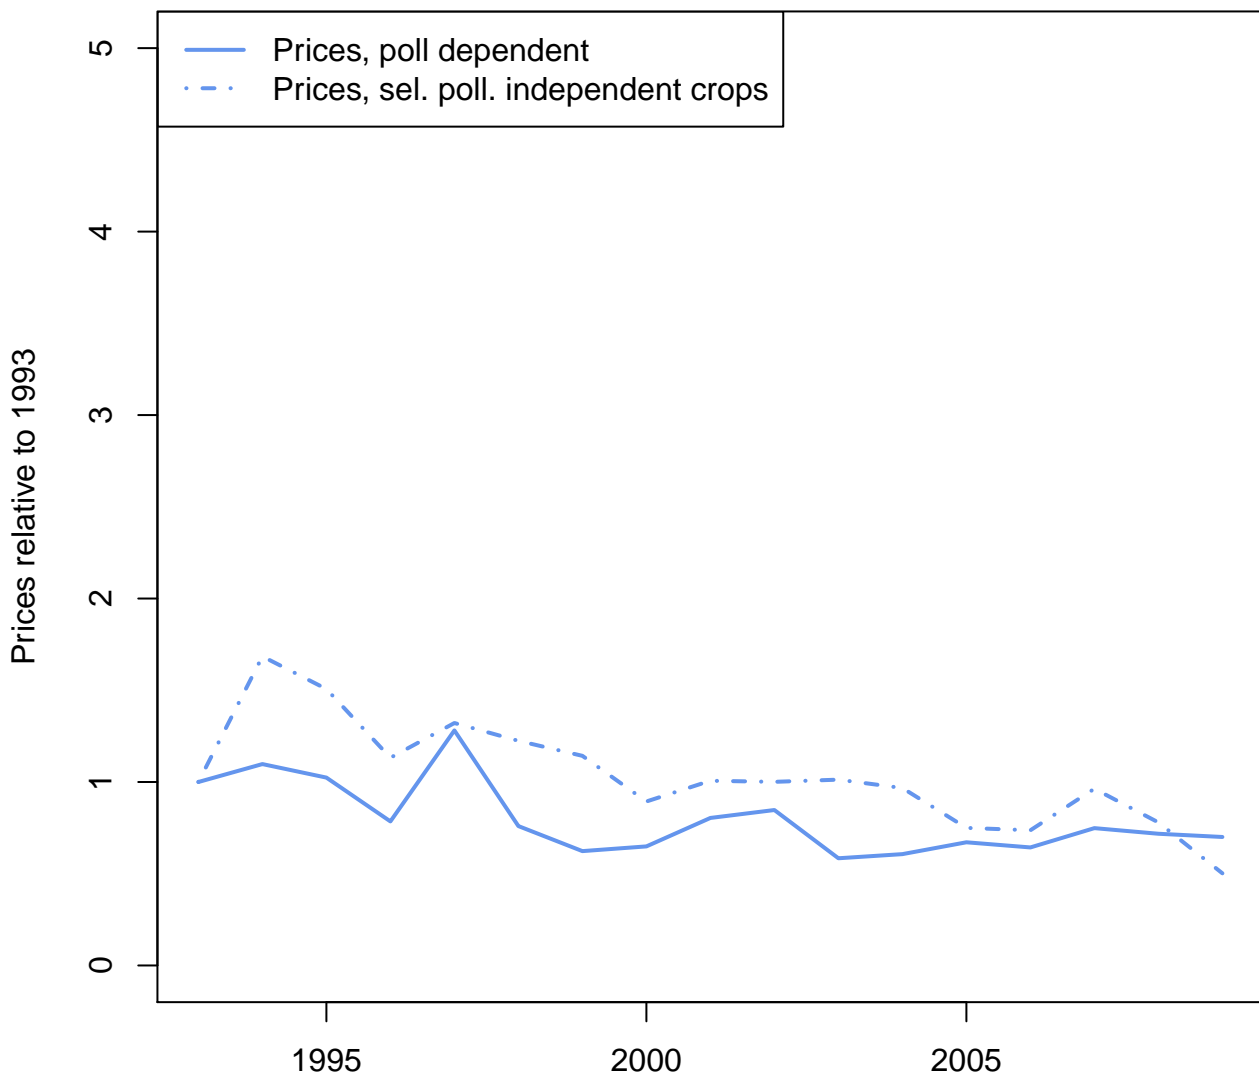

# Togo

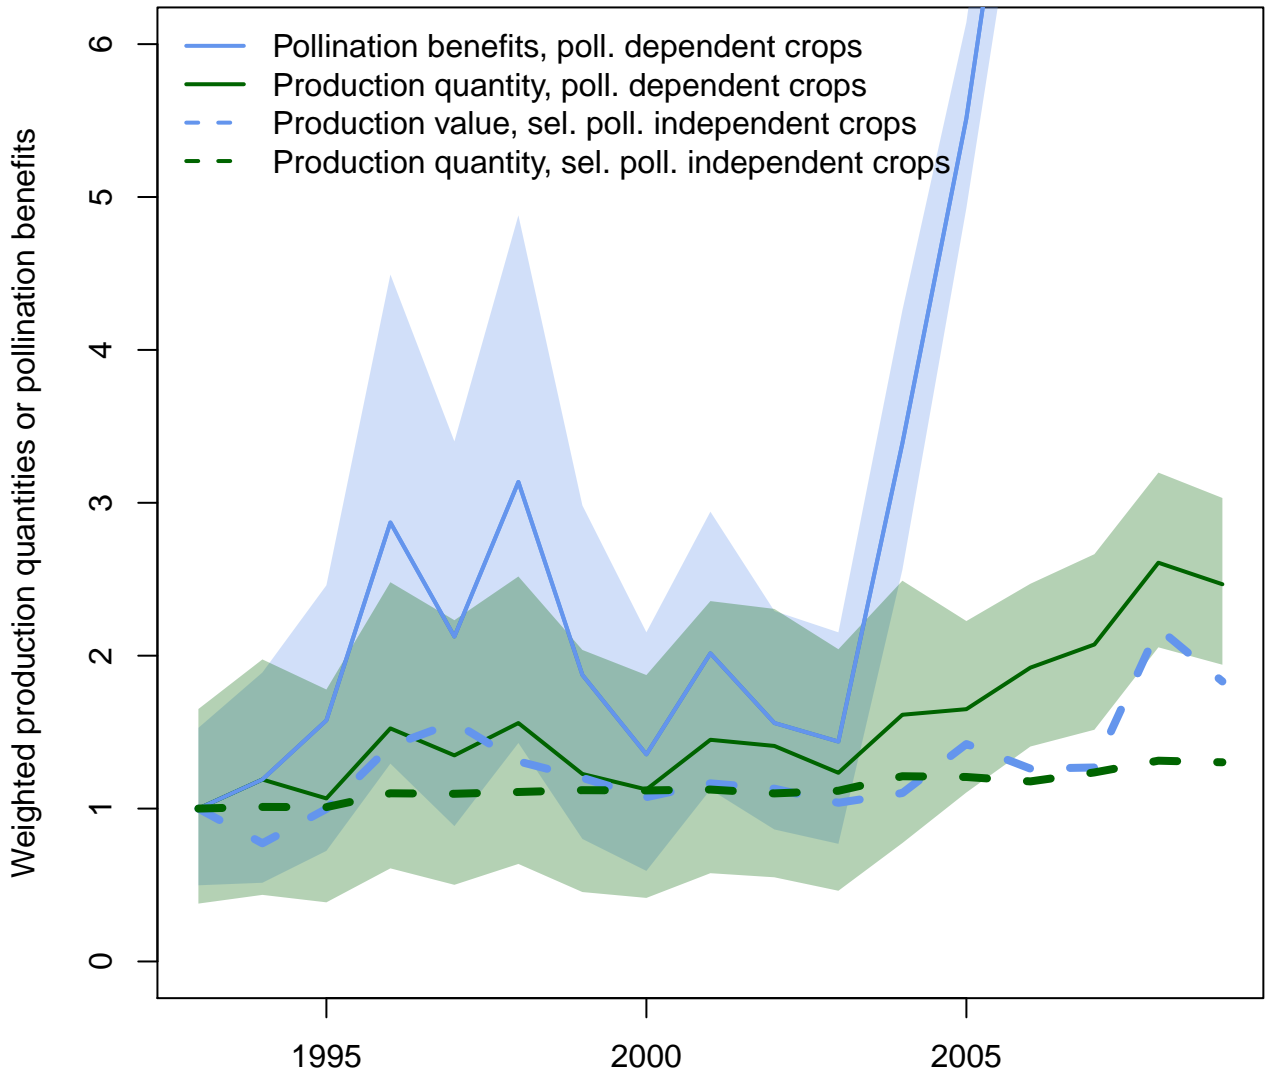

# Togo

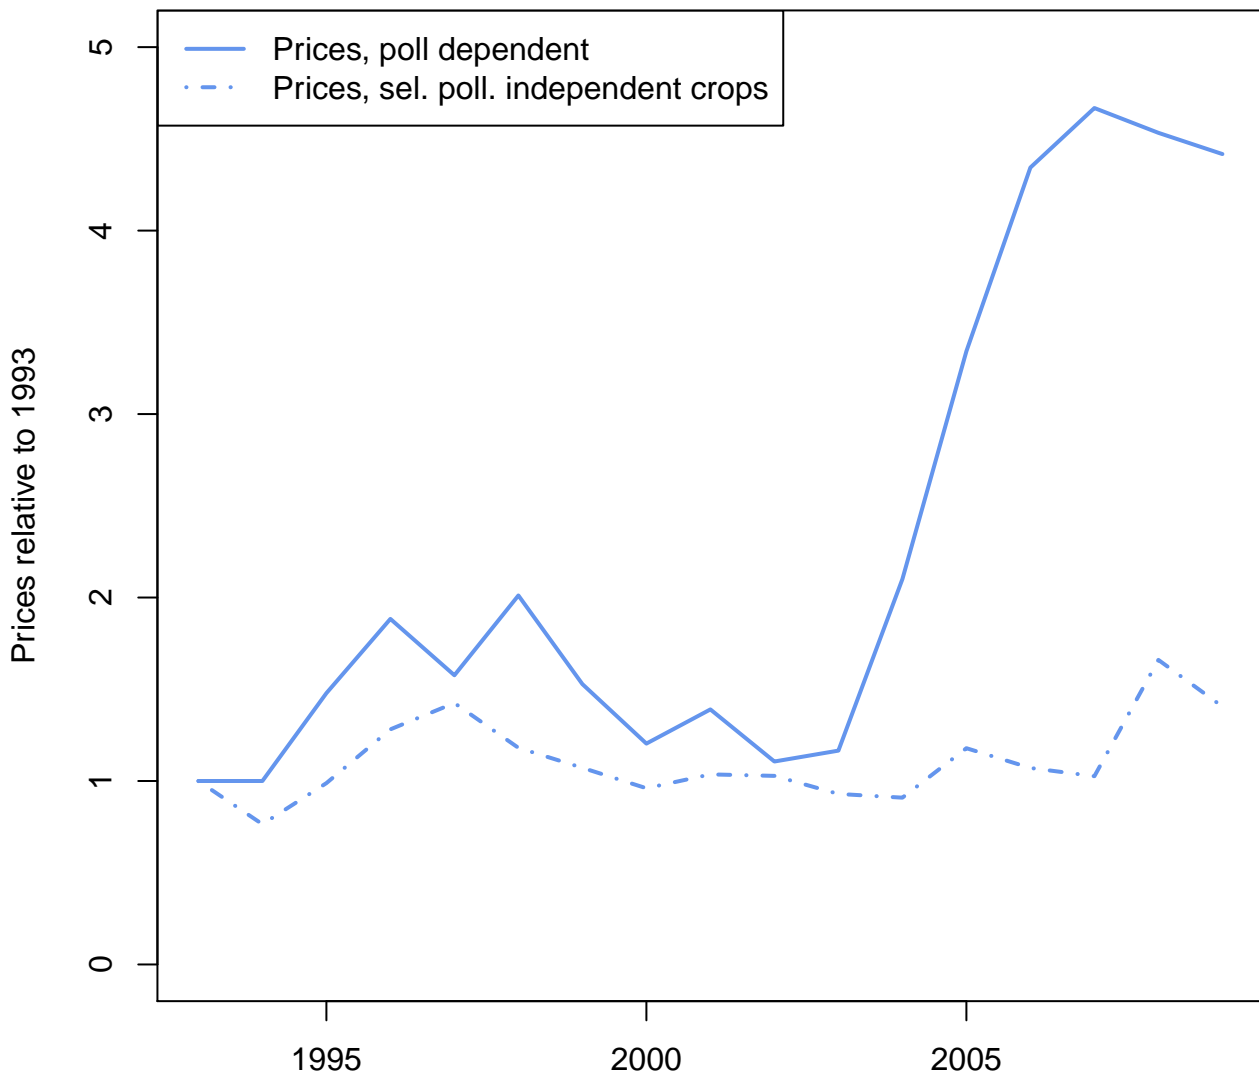

# Trinidad and Tobago

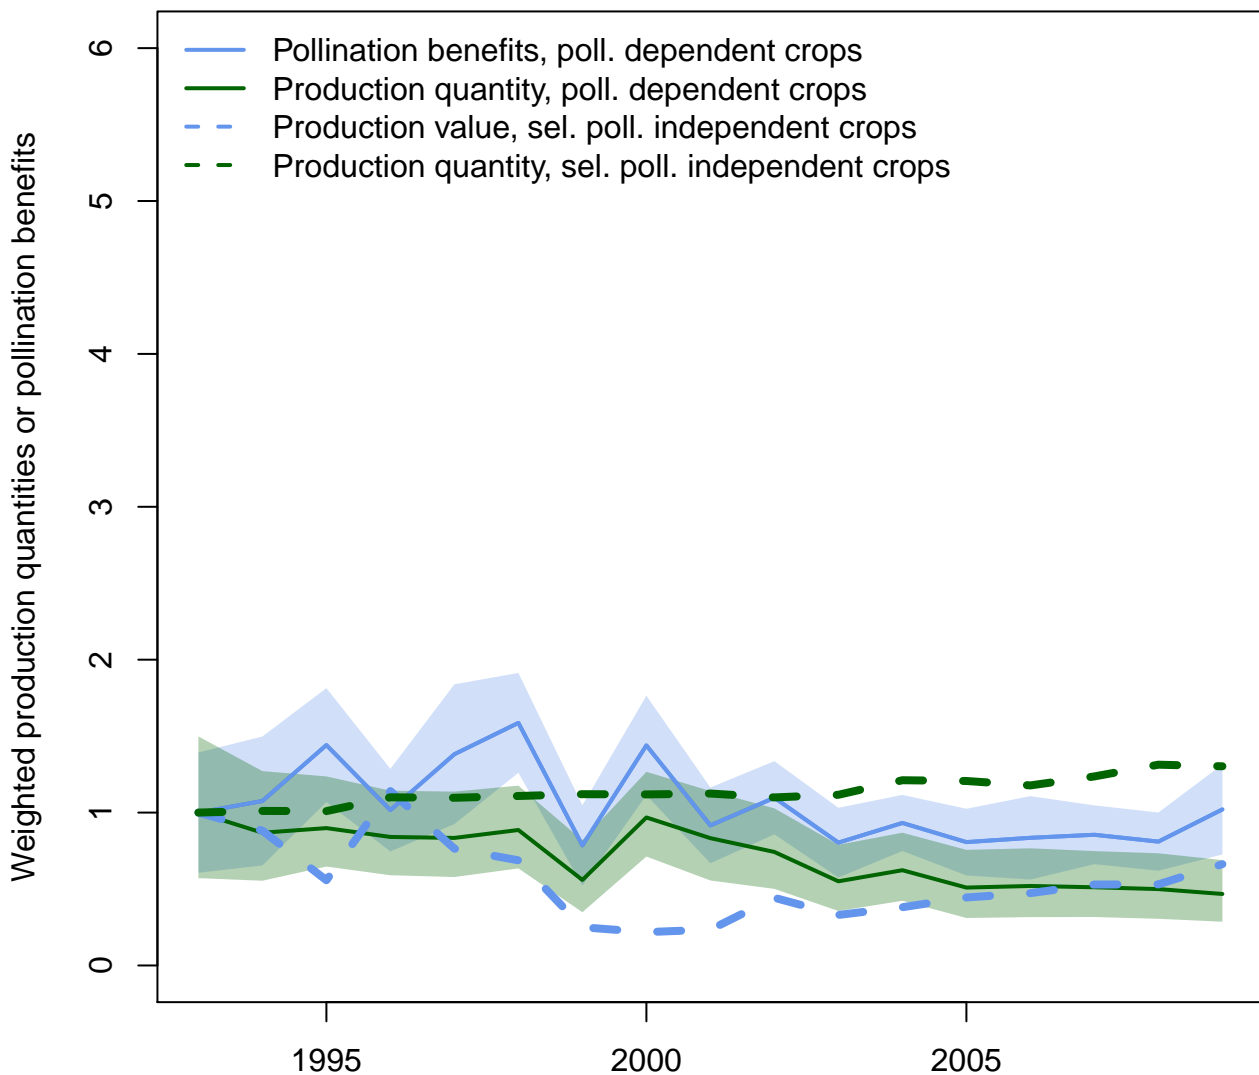



# Trinidad and Tobago

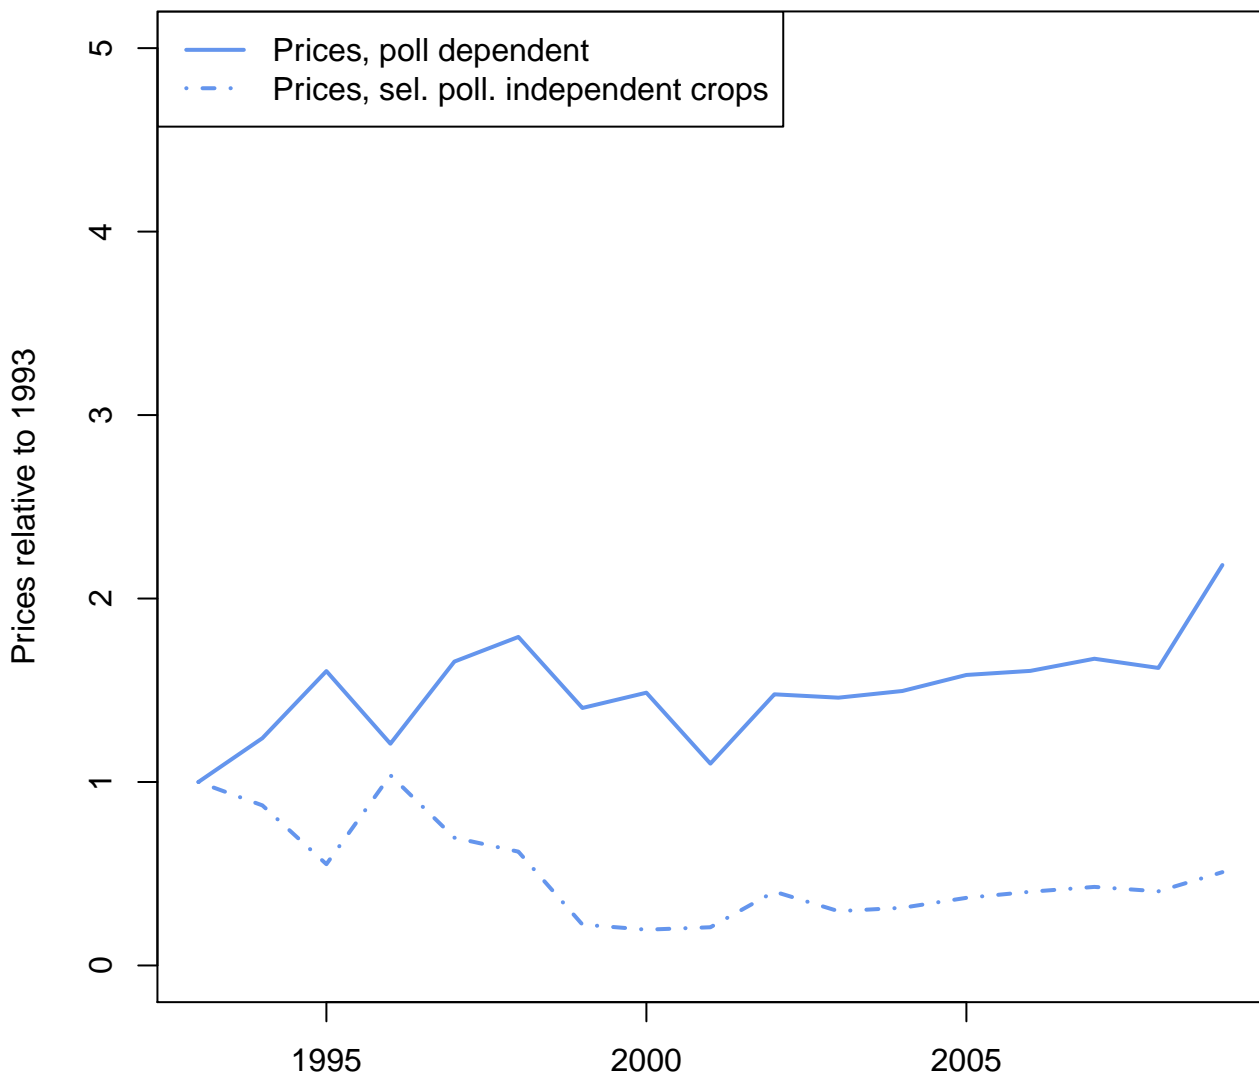

# Tunisia

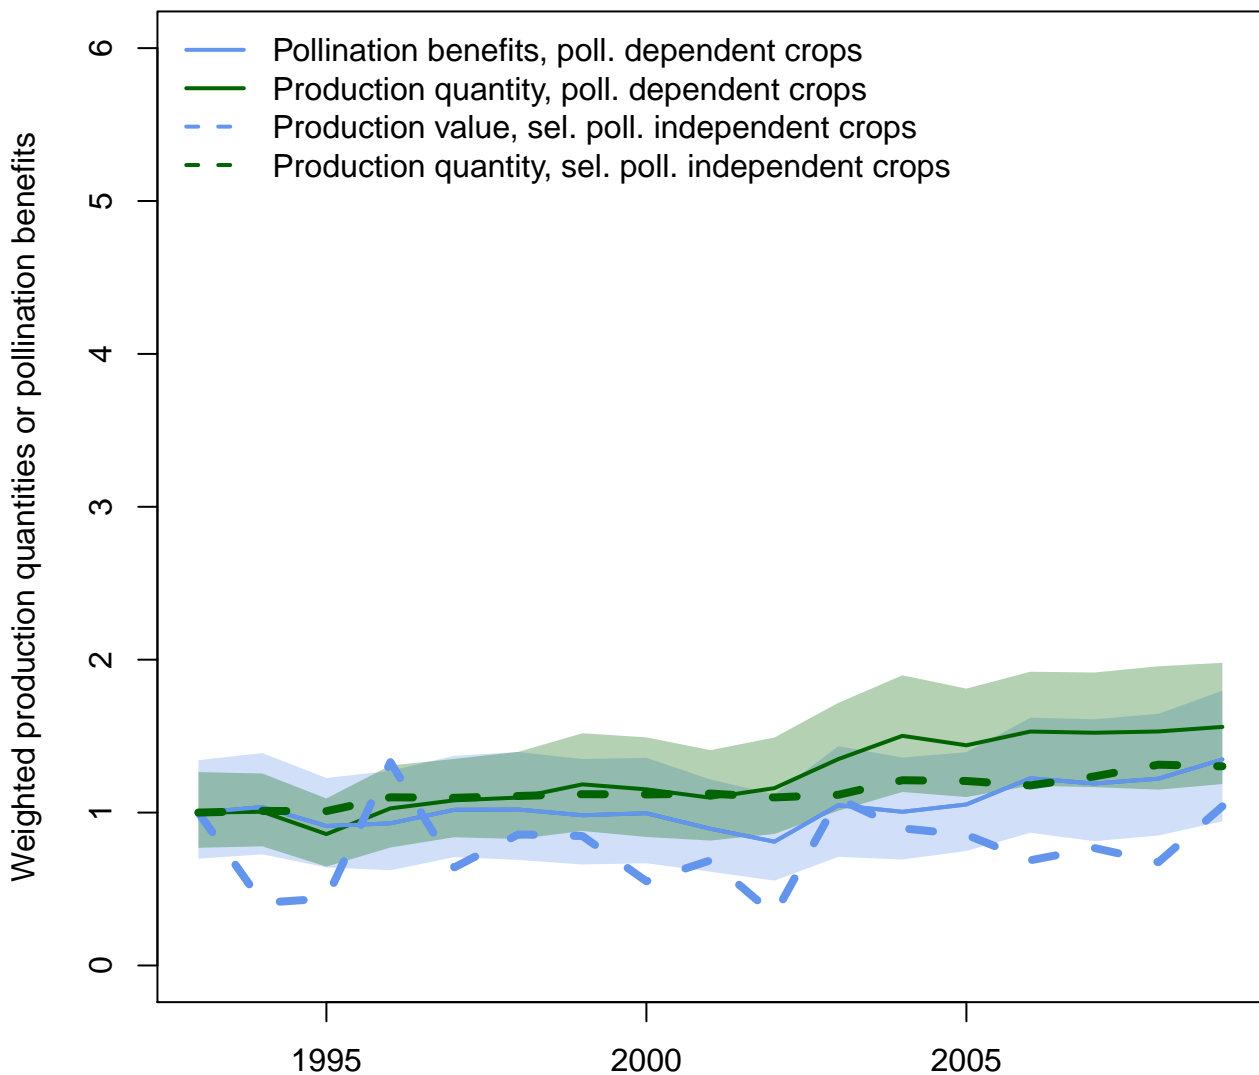

# Tunisia

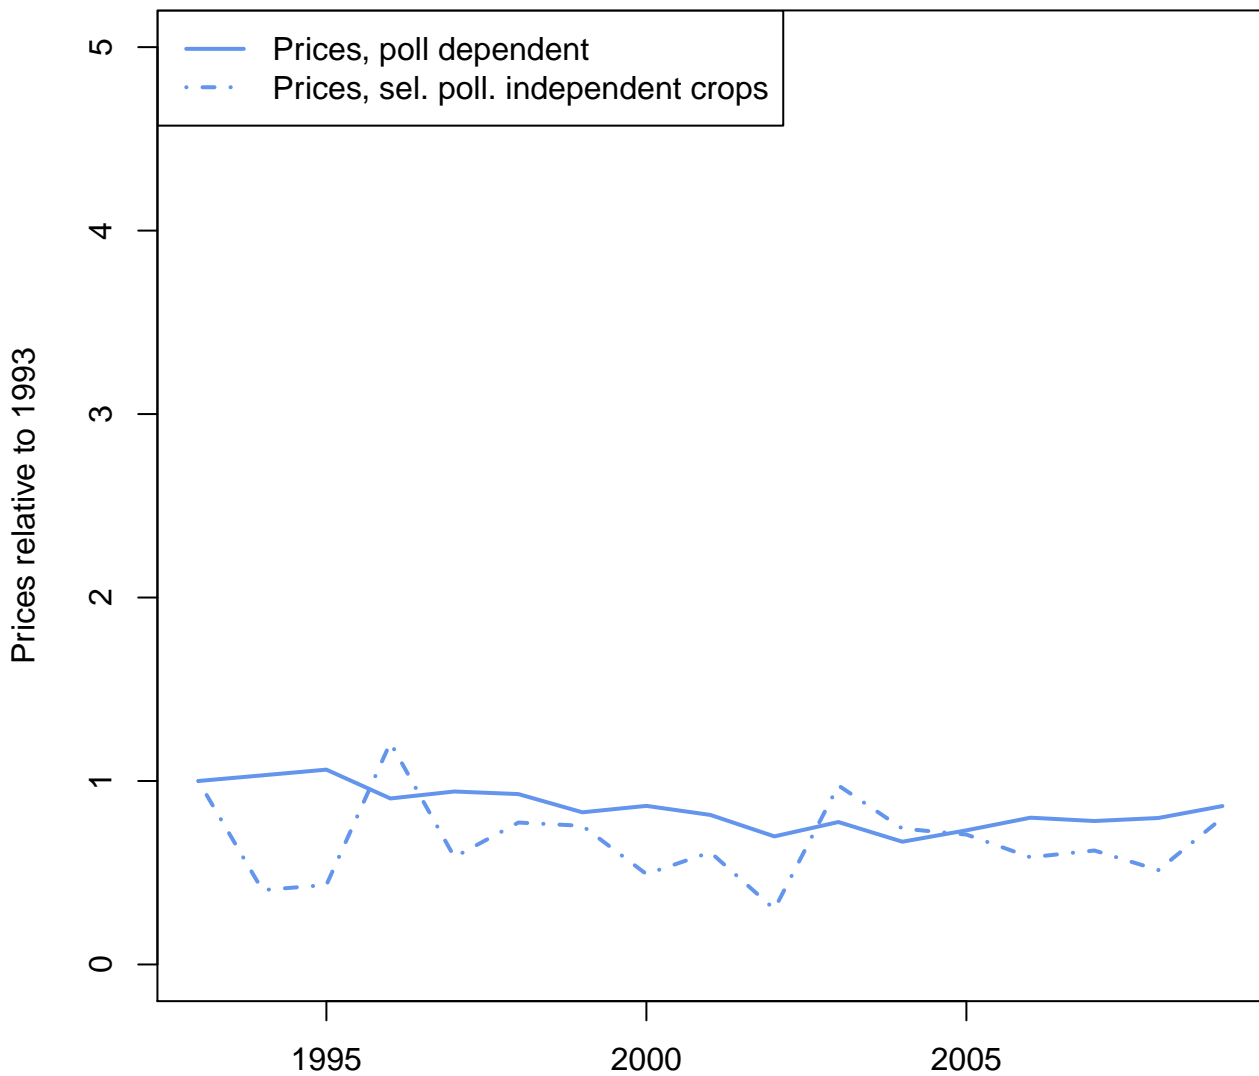

# Turkey

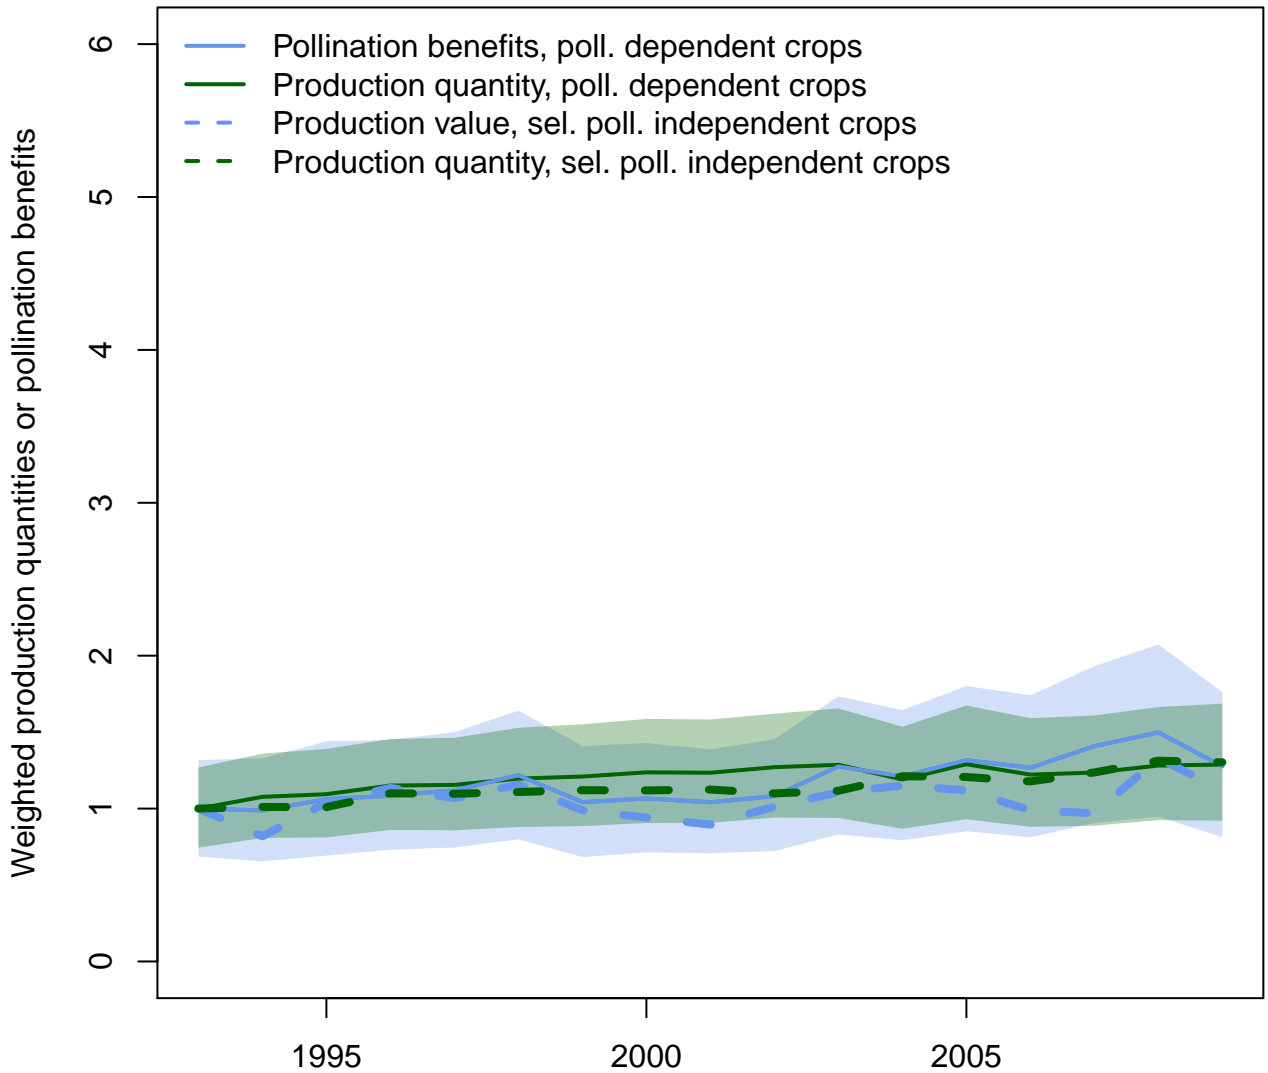

# Turkey

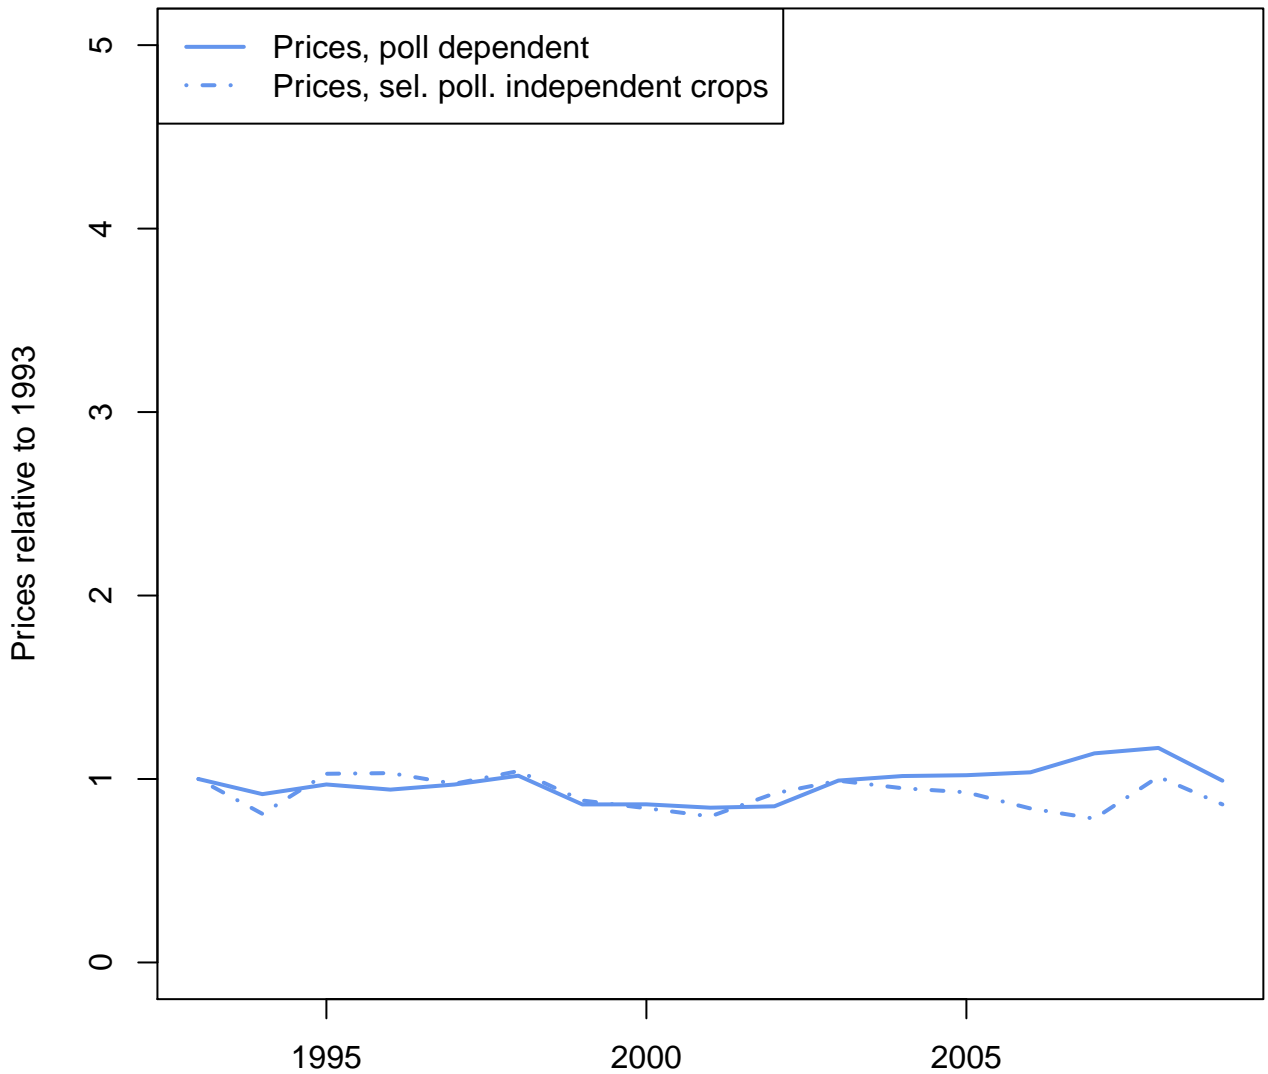

# Turkmenistan

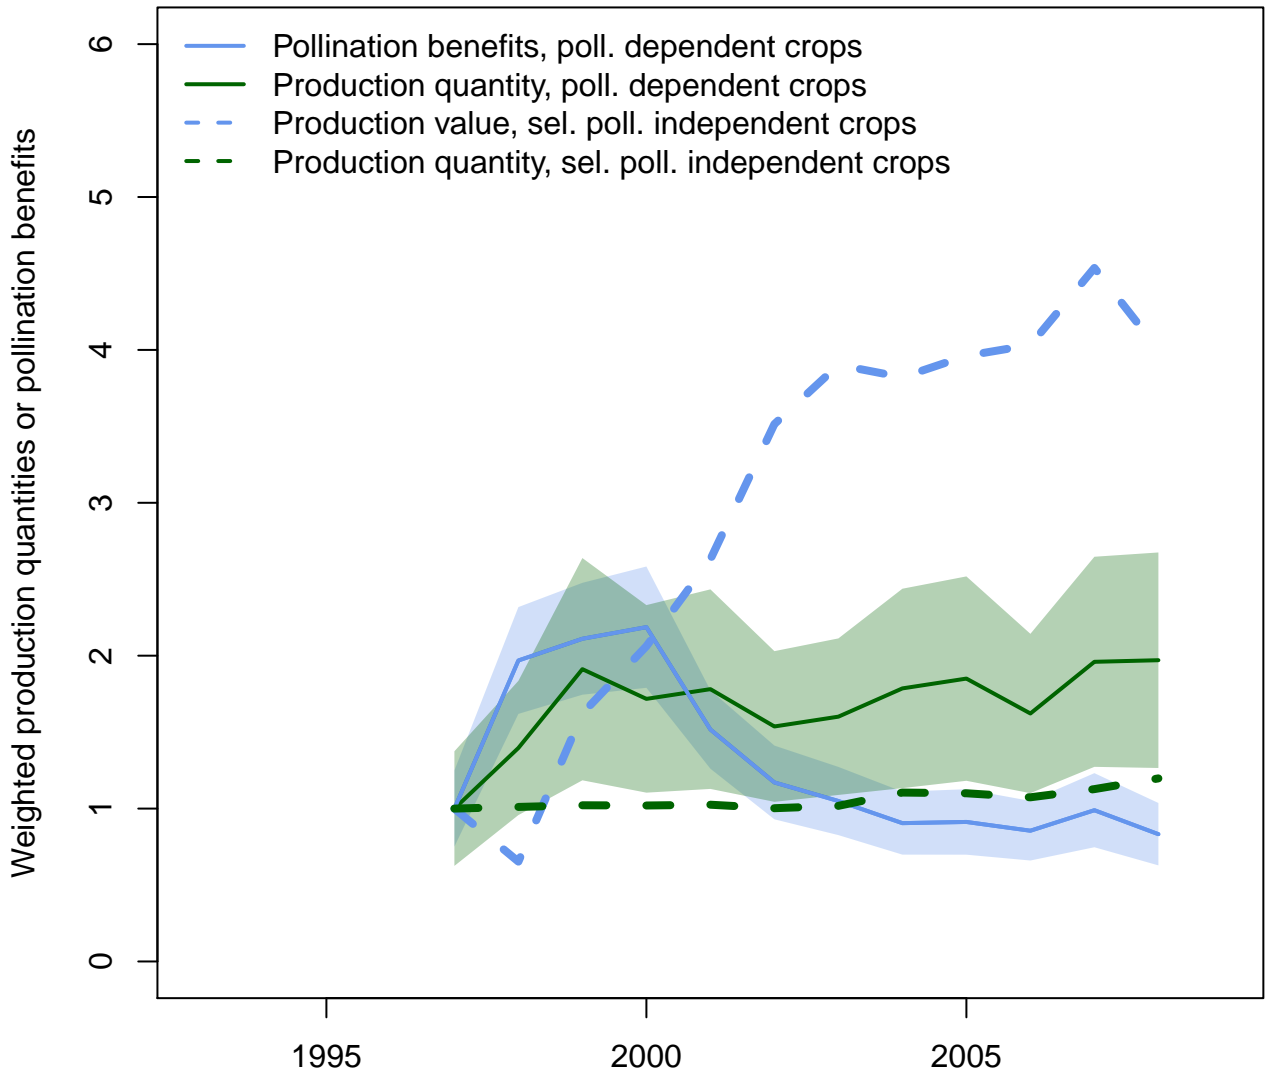

# Turkmenistan

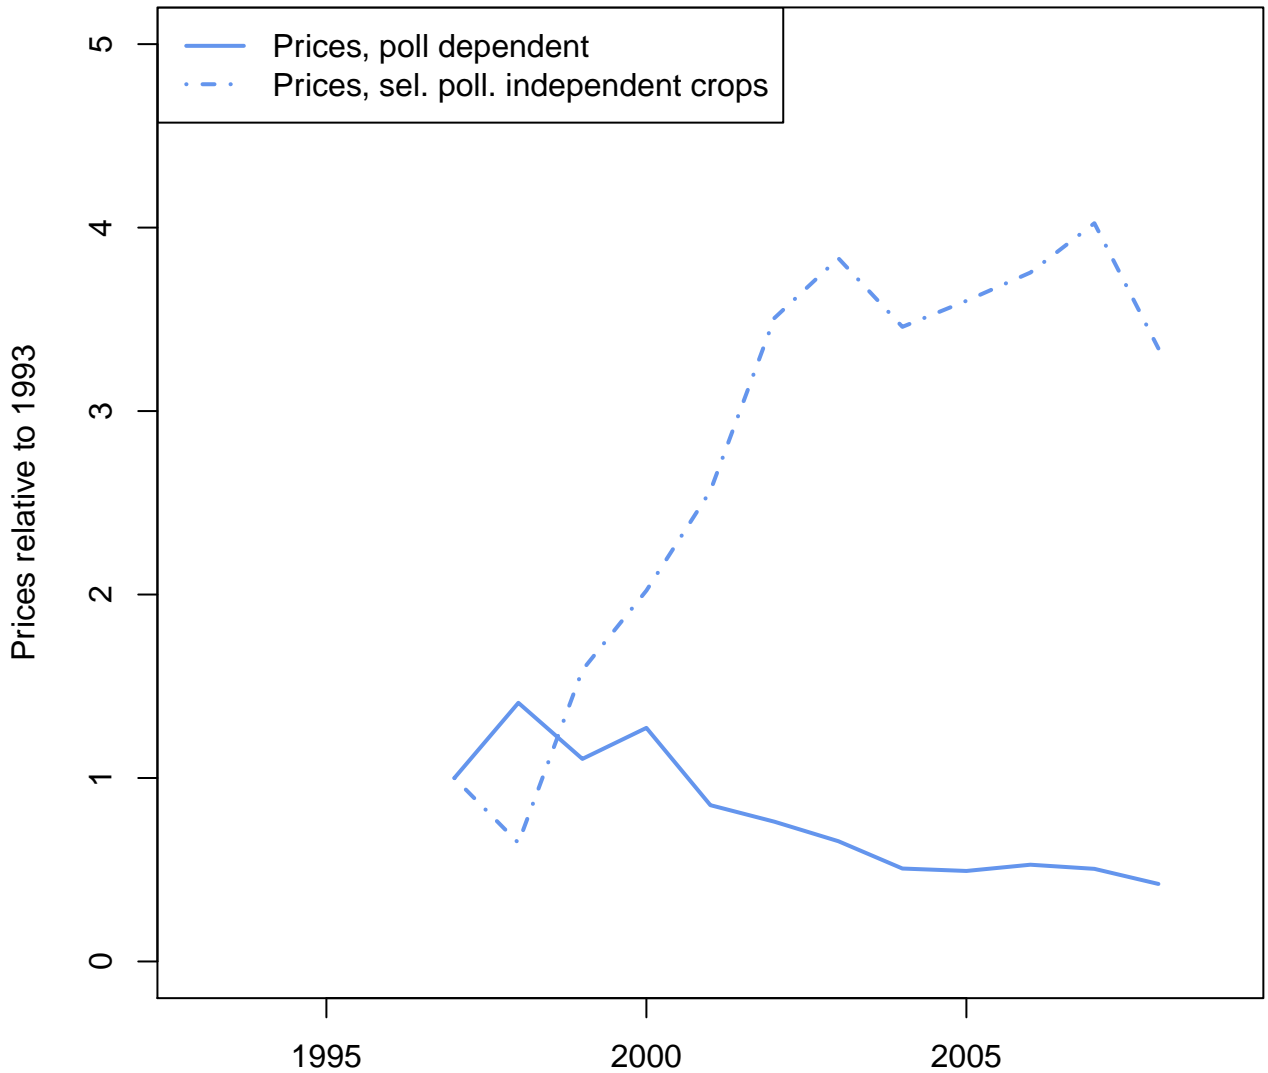

# Ukraine

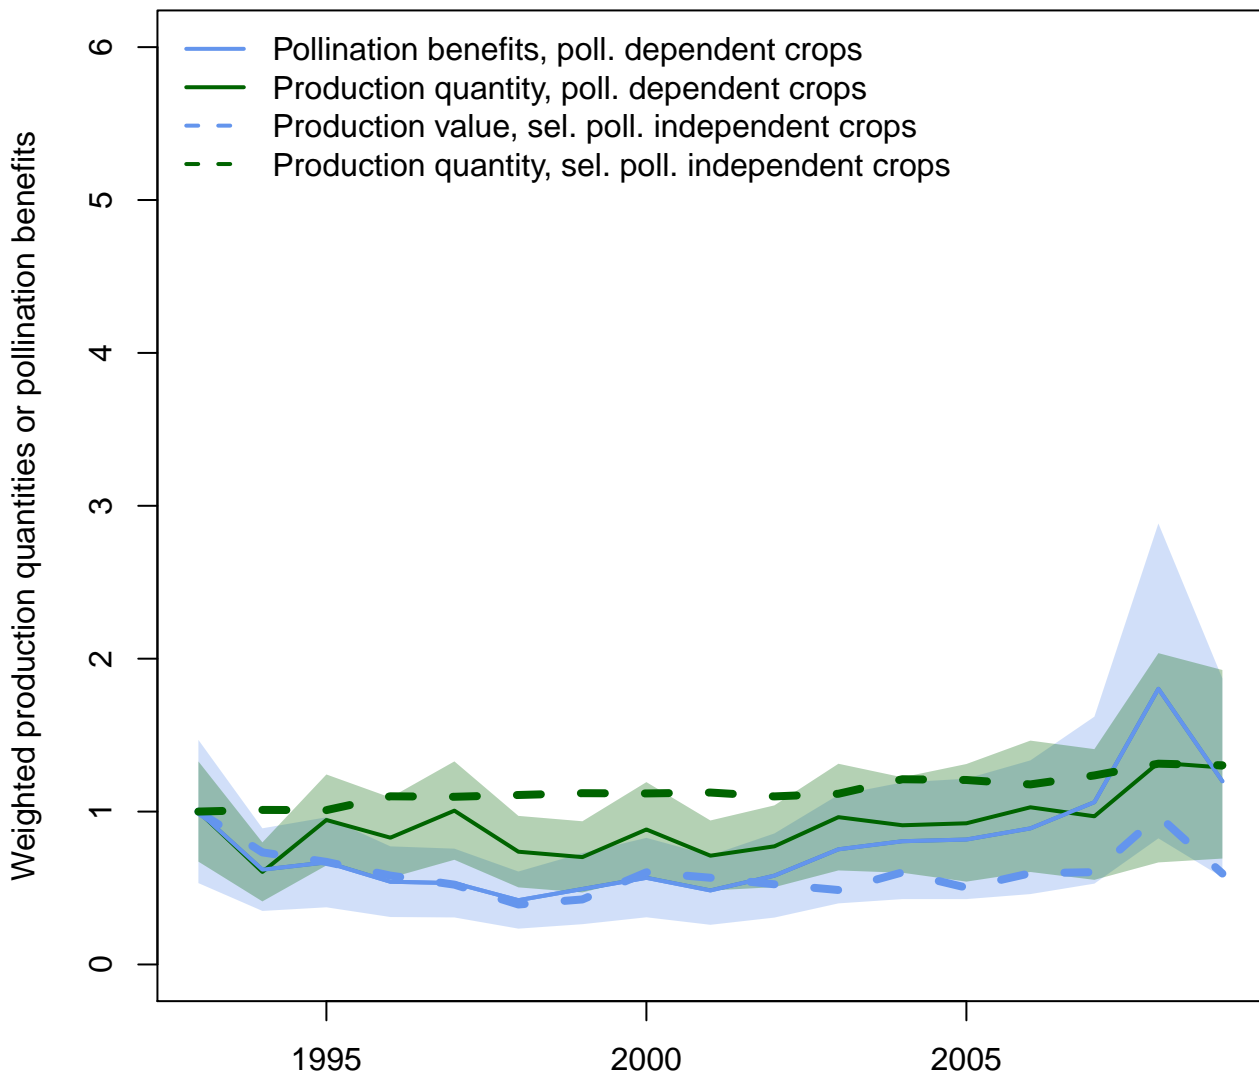



# Ukraine

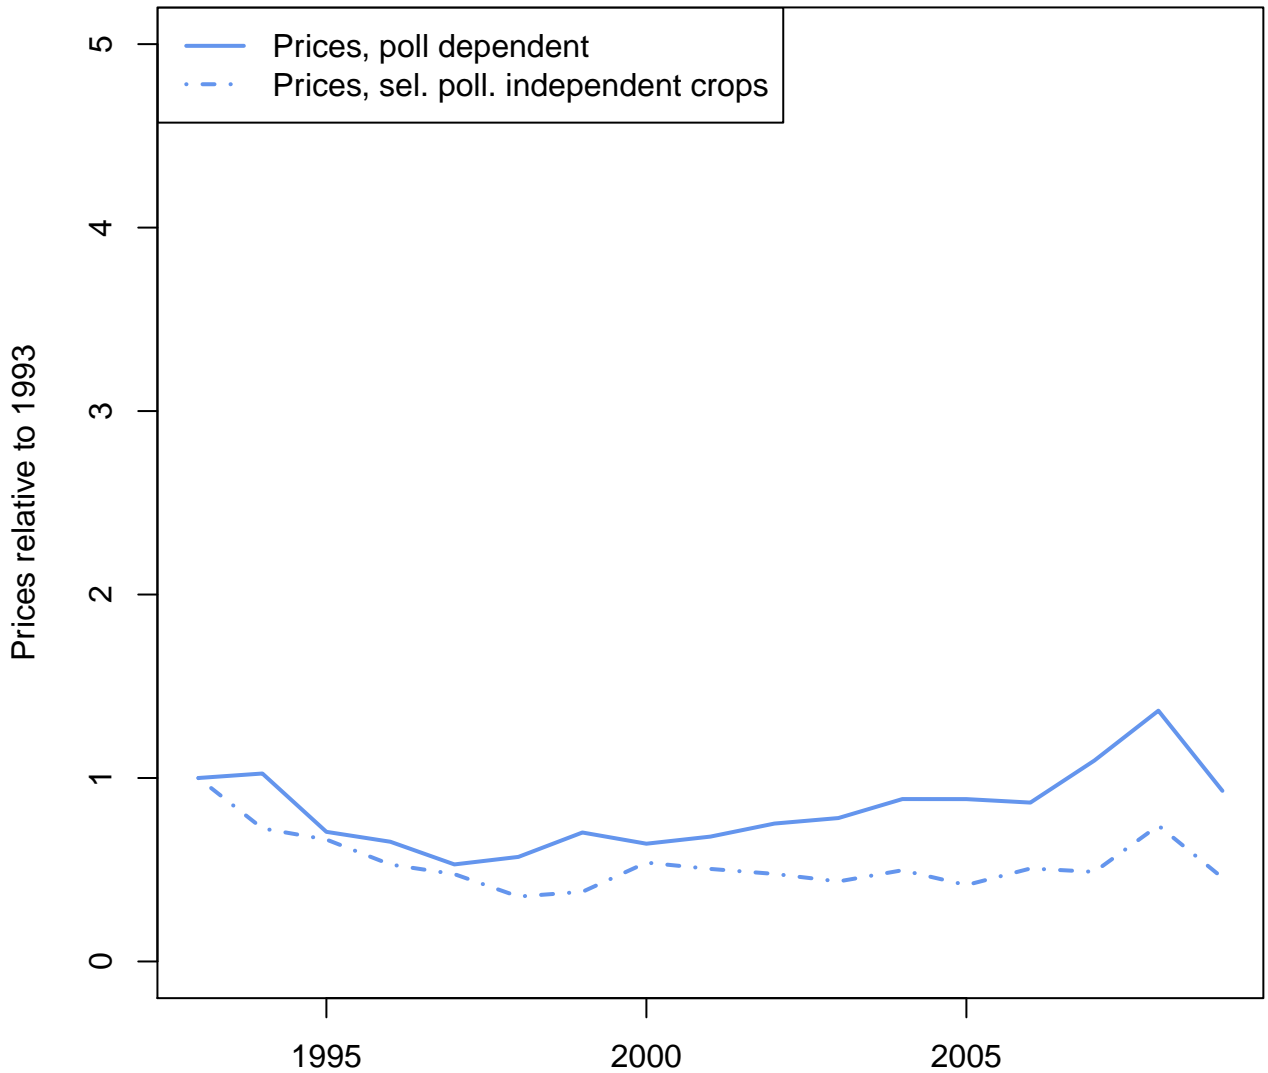

# United Kingdom

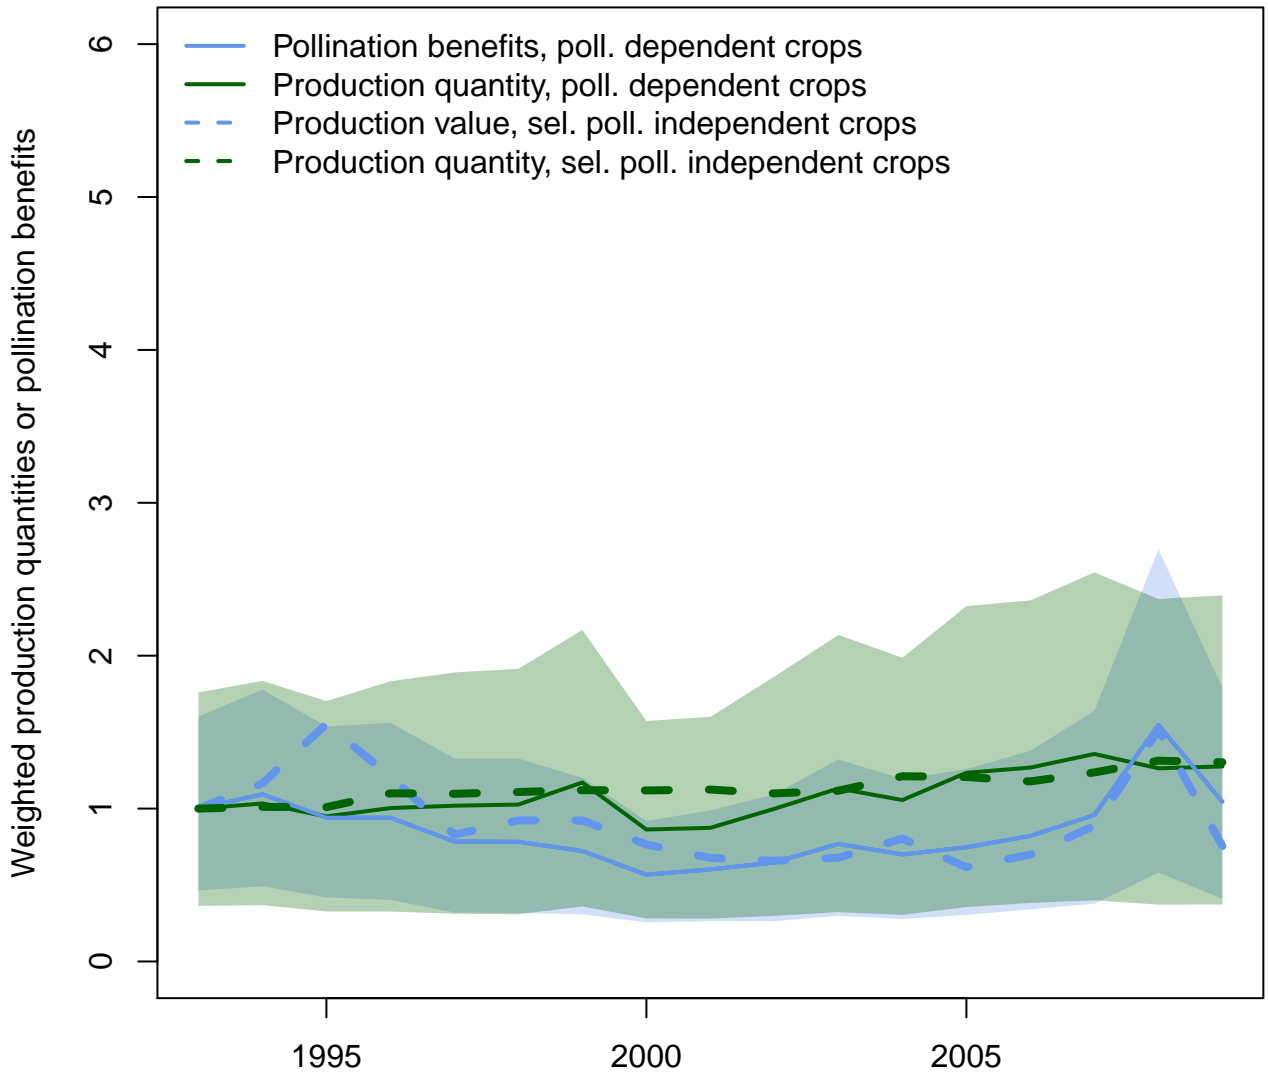

# United Kingdom

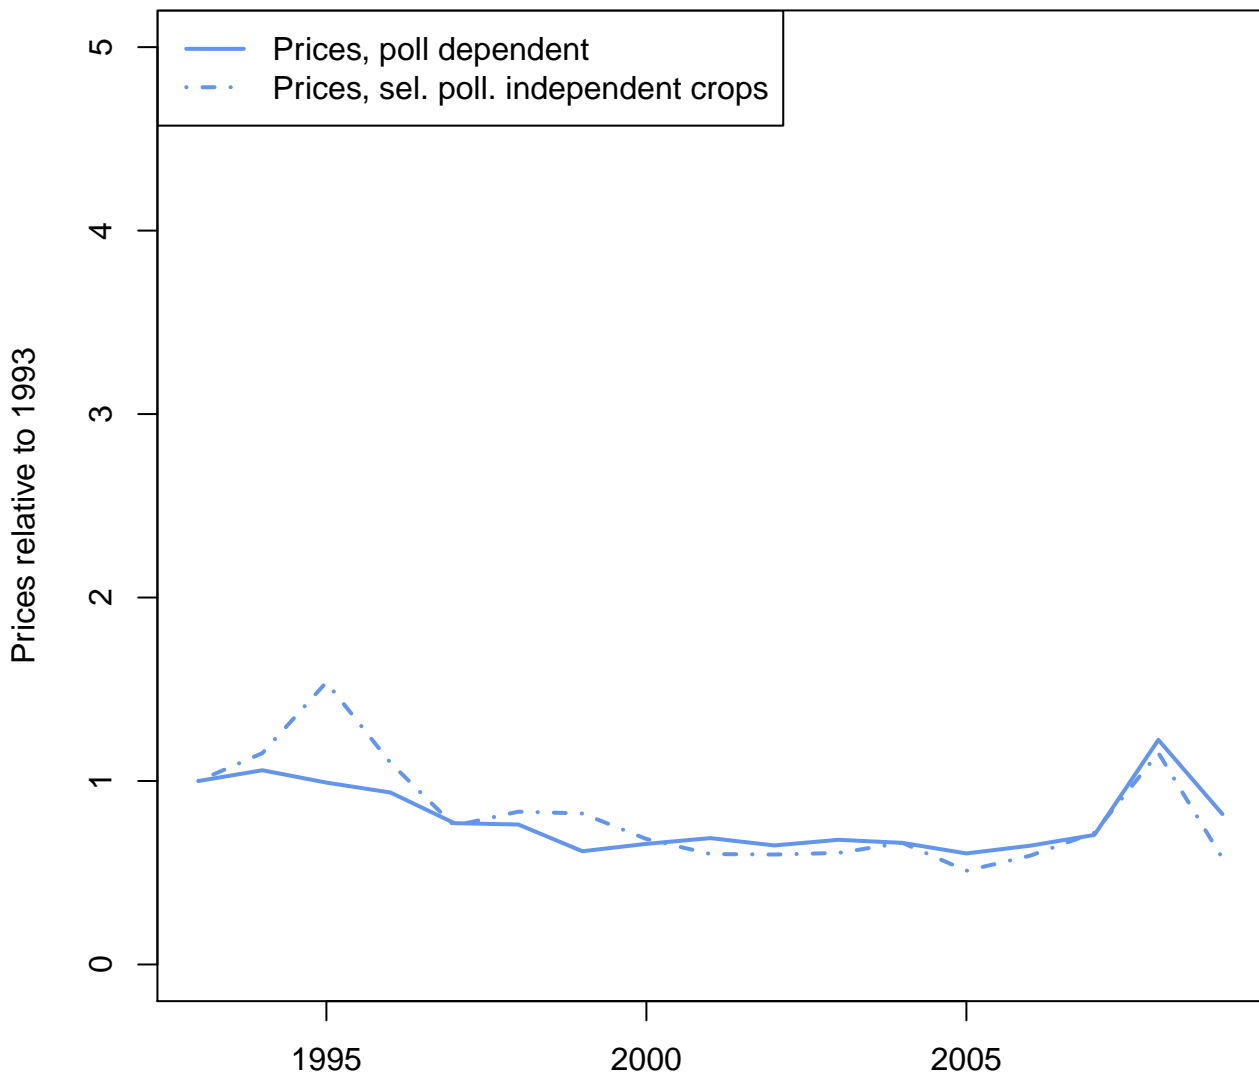

## United States of America

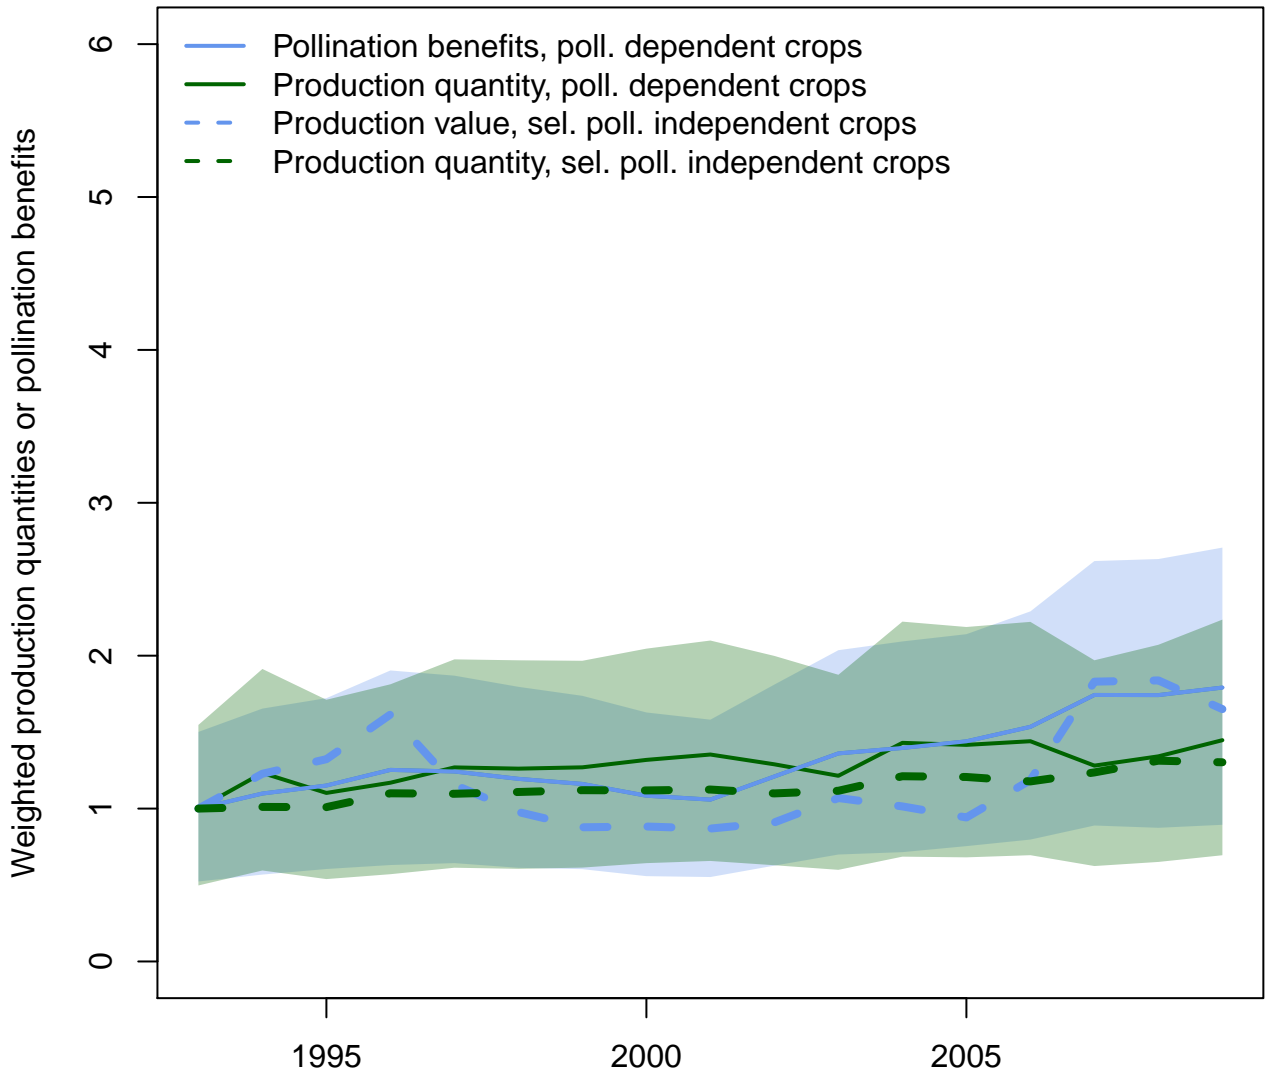

# United States of America

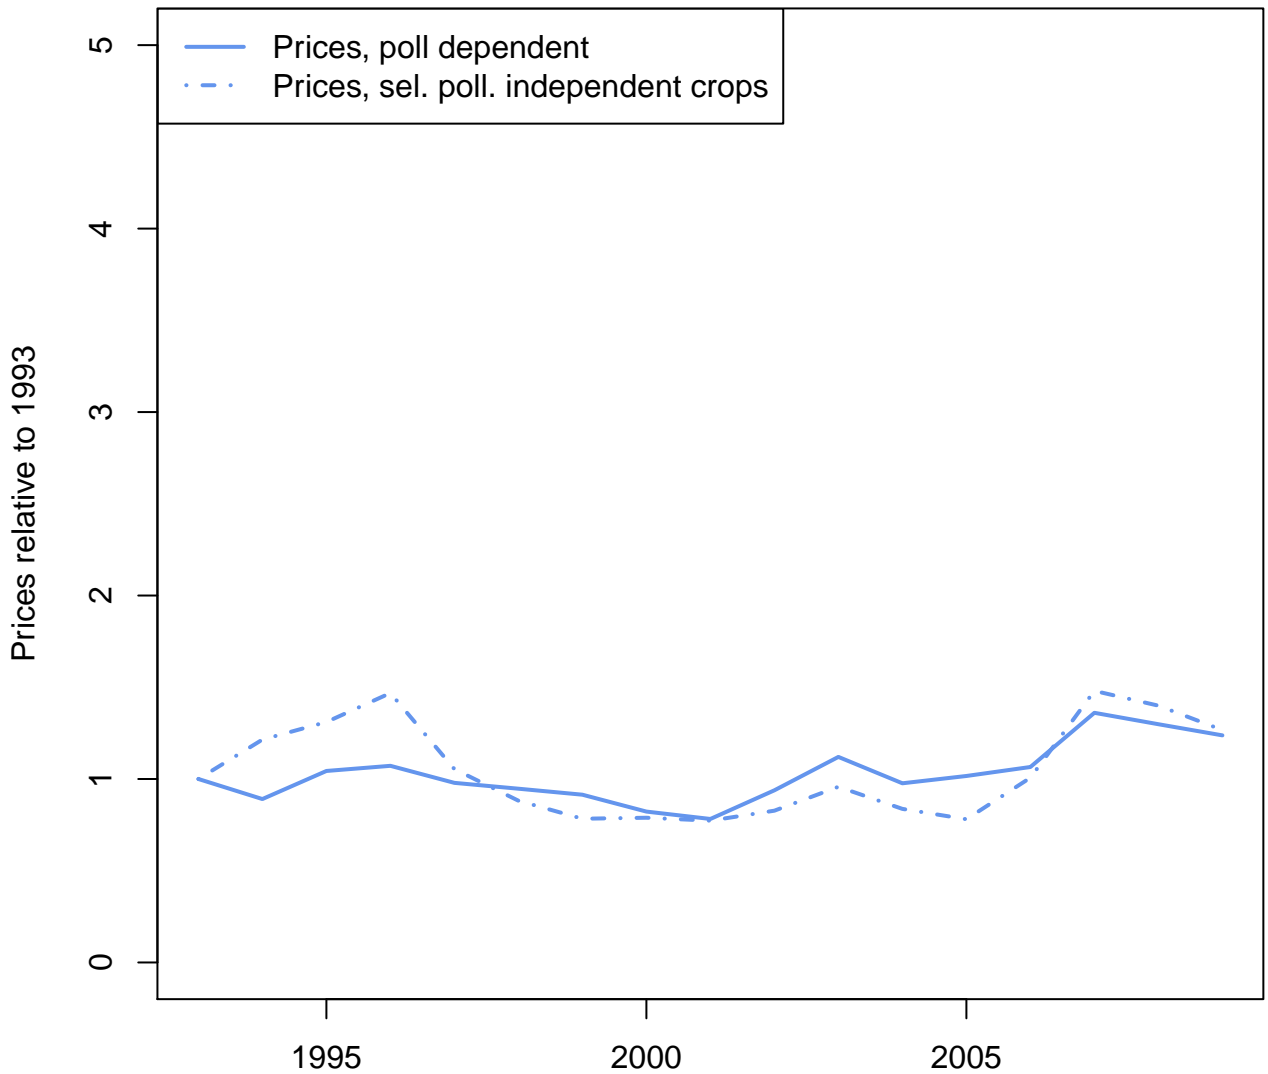

# Uruguay

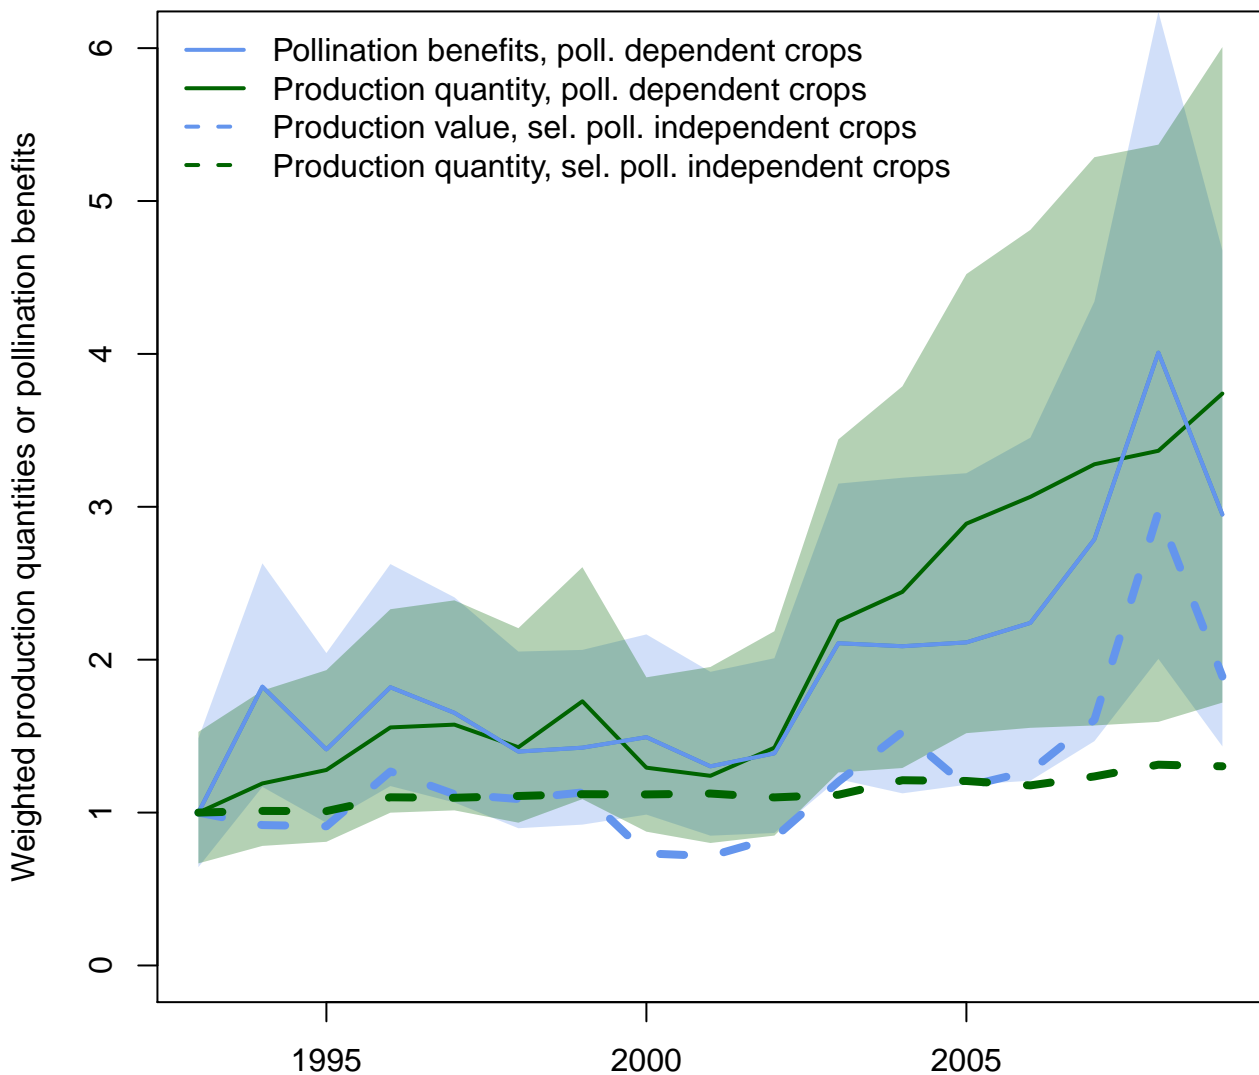

# Uruguay

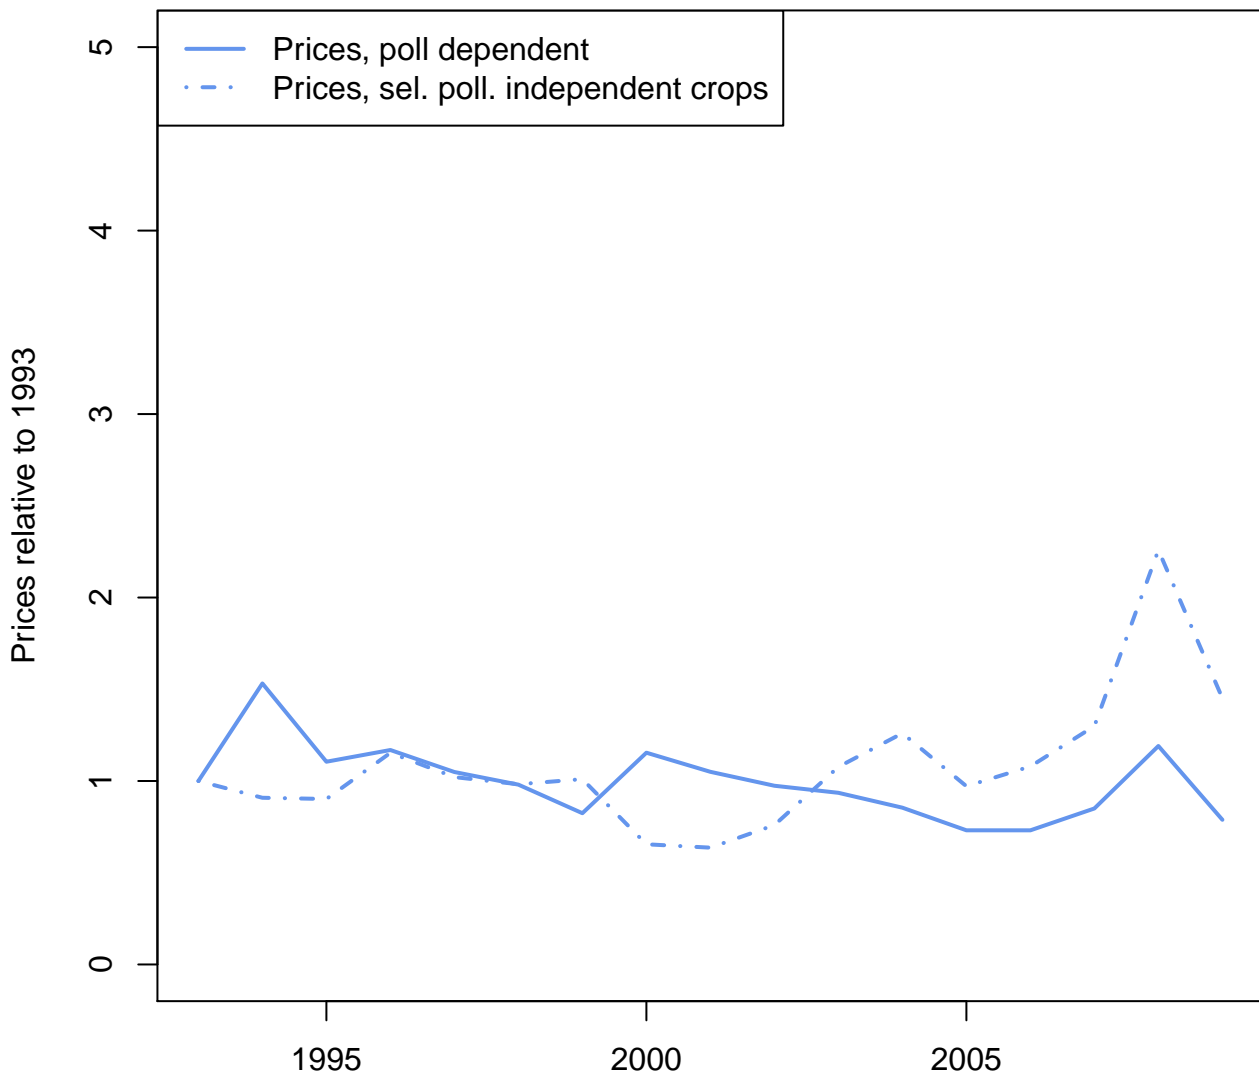

## Venezuela (Bolivarian Republic of)

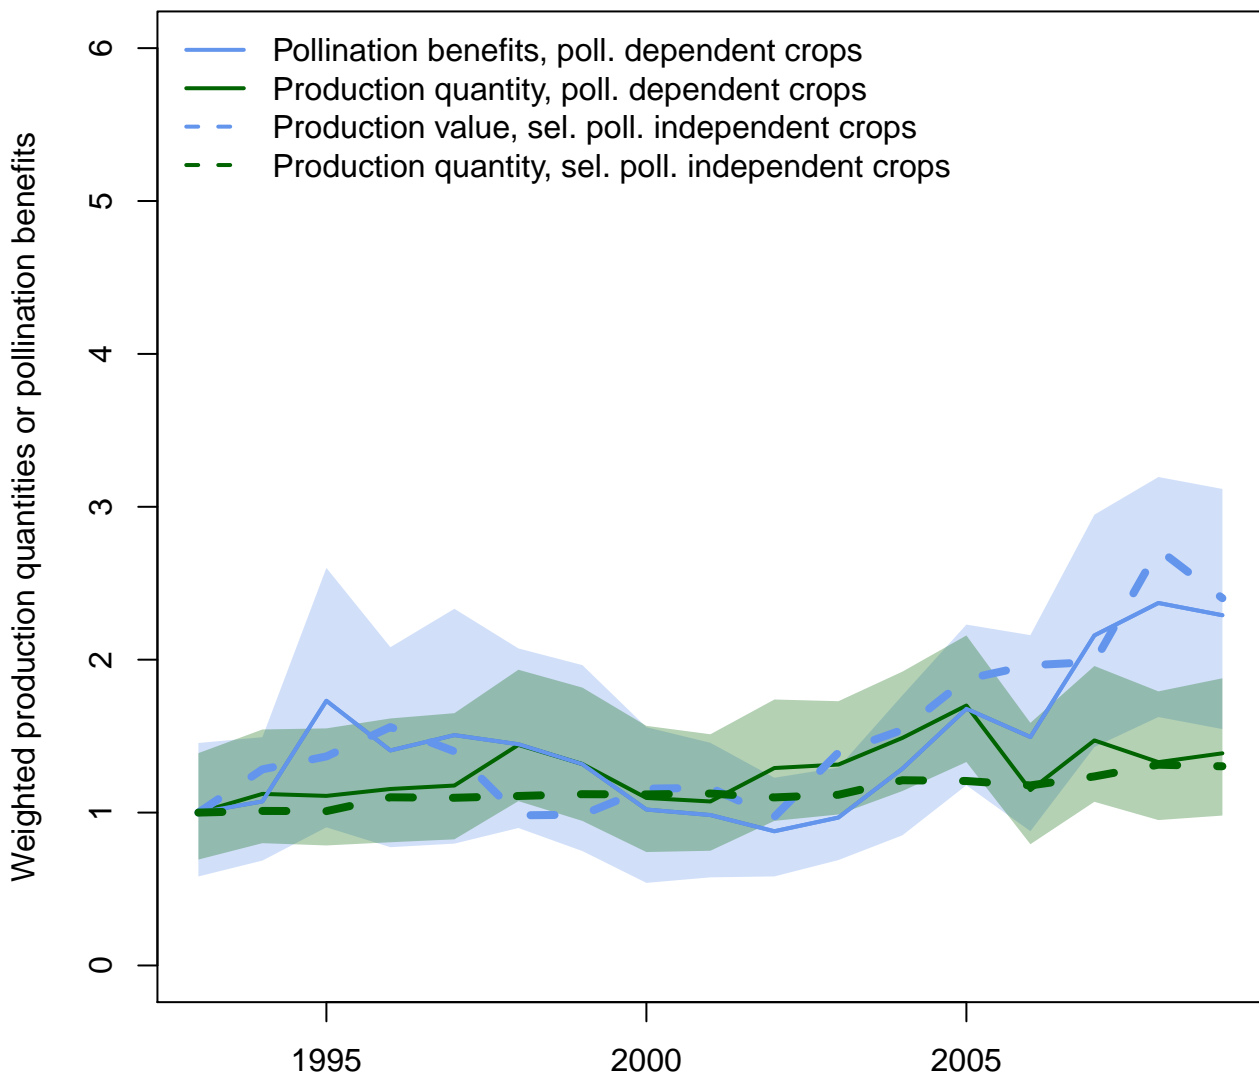



## Venezuela (Bolivarian Republic of)

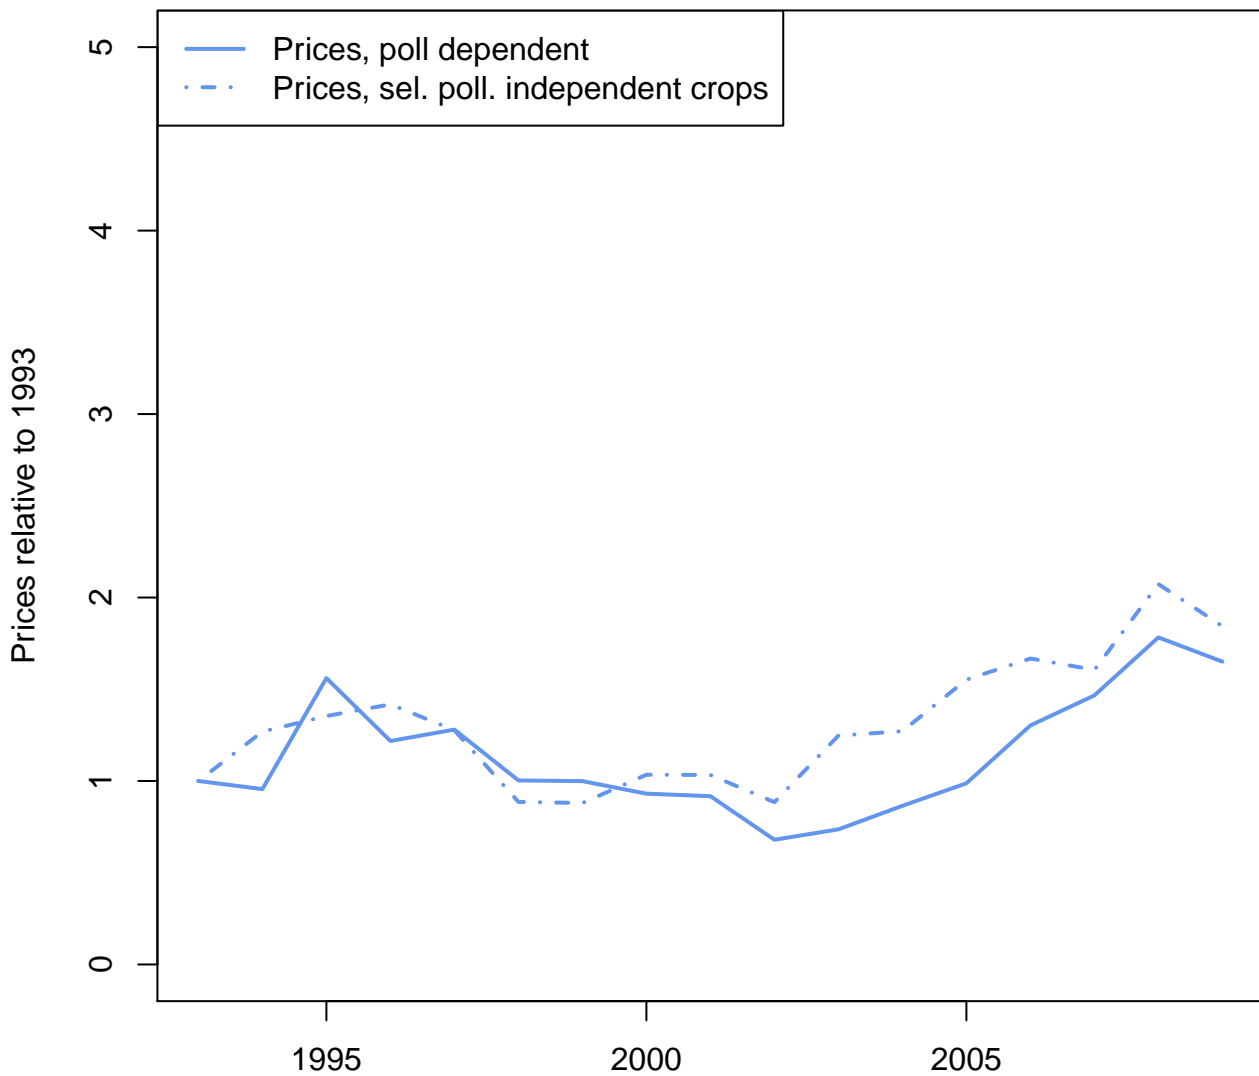

# Yemen

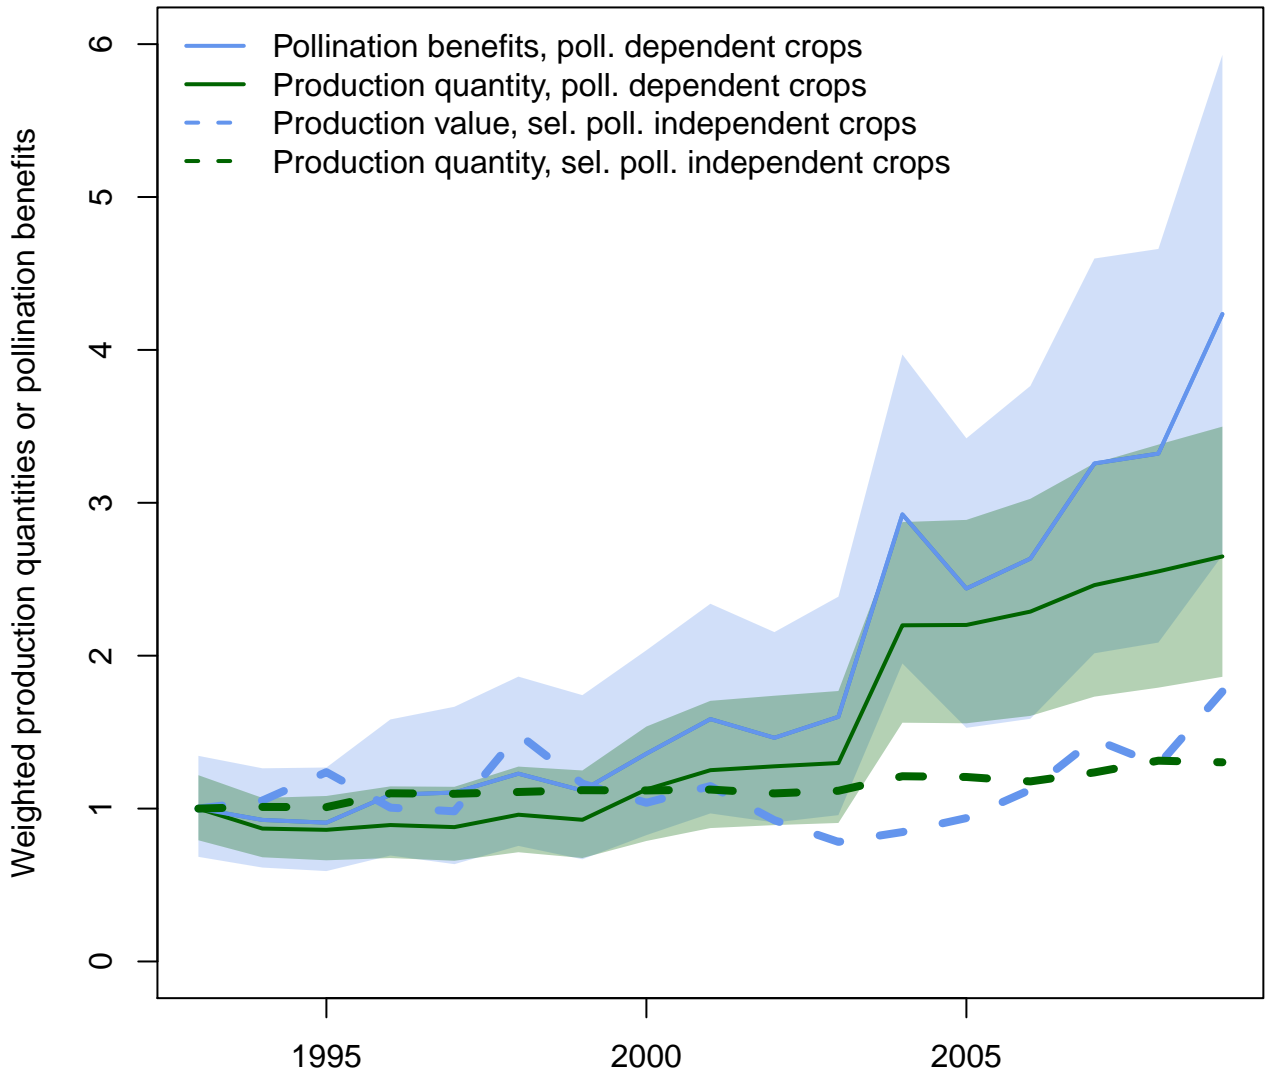

# Yemen

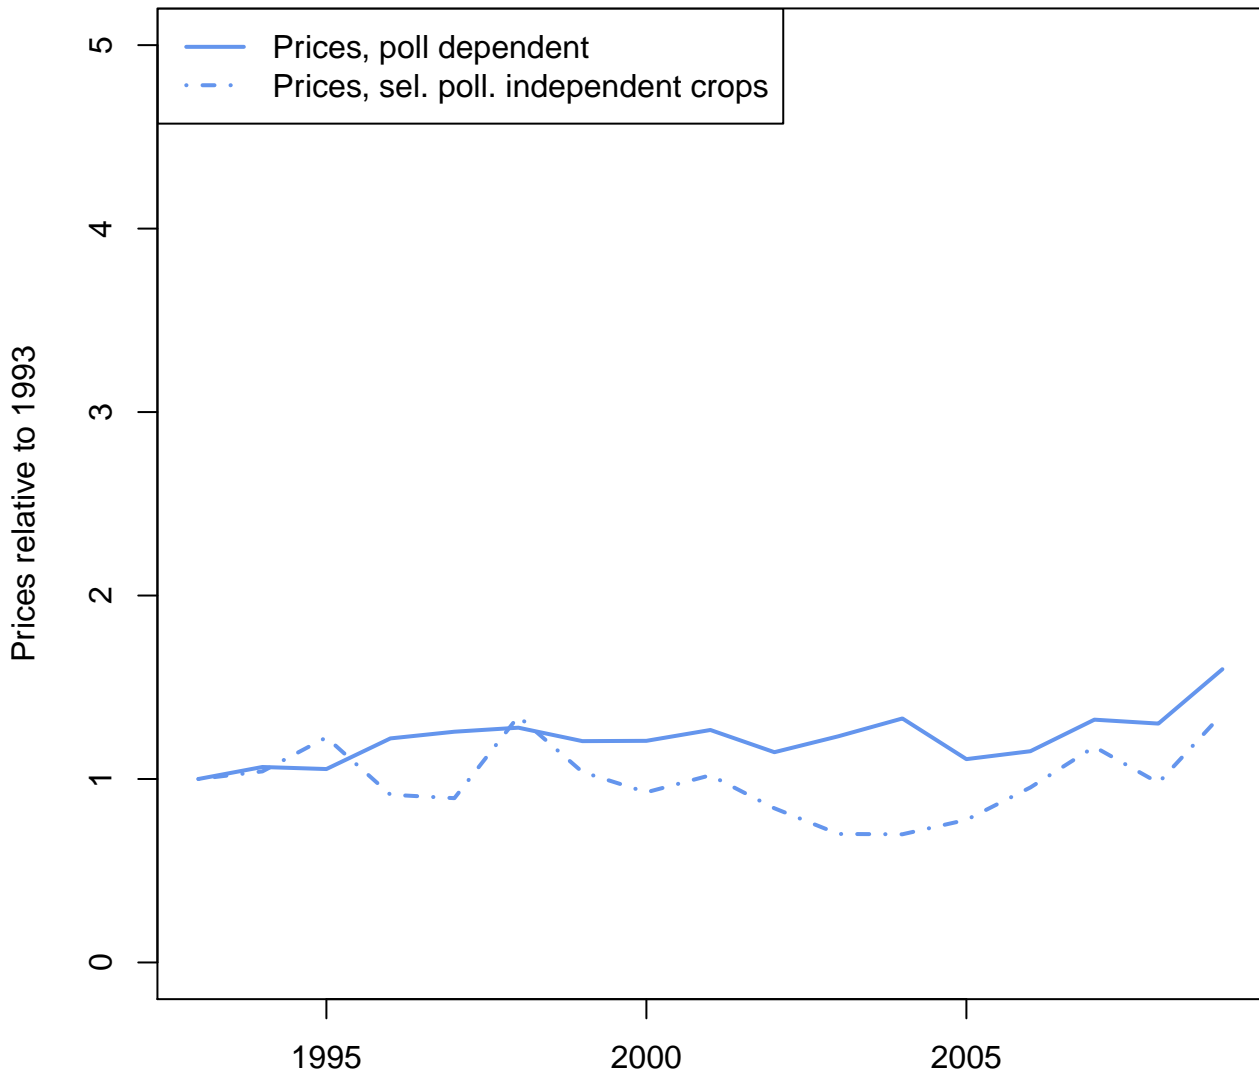

Supplement: S1 (10.1371/journal.pone.0035954.s001) [file journal.pone.0035954.s001]
