# Supplementary material for: Spatial and Temporal Trends of Global Pollination Benefit
Source: PLOS journal article supplement (doi:10.1371/journal.pone.0035954), 2012-04-26
Supplement: S4 (10.1371/journal.pone.0035954.s004) [file journal.pone.0035954.s004]

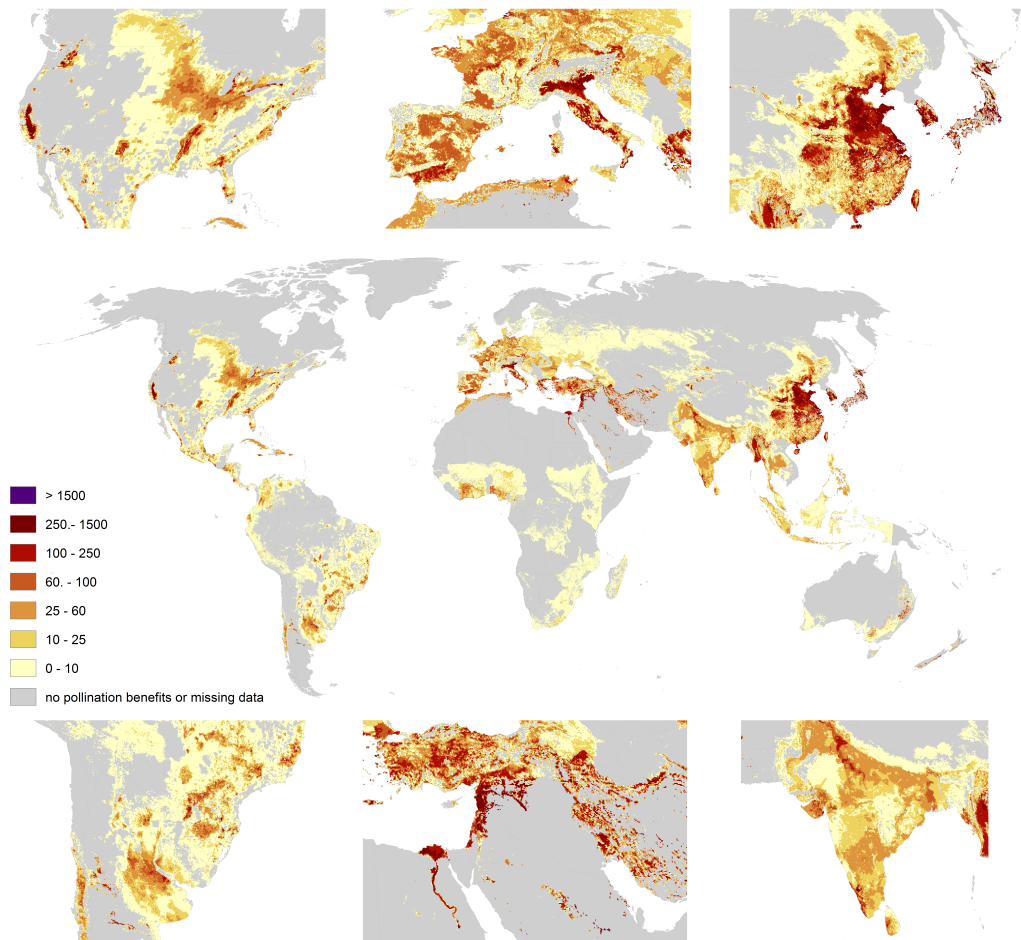

**Figure S4 Global map of pollination benefits. Values are given as US \$ per hectare for the year 2000. The values have been corrected for inflation (to the year 2009) as but not for purchasing power parities. The area we relate yields to is the total area of the raster cell.**
